# Supplementary material for: Poxvirus Replication Remodels Host m⁶A Epitranscriptome to Advance Infection
Source: Research Square preprint supplement (doi:10.21203/rs.3.rs-8681681/v1), 2026-02-05
Supplement: Supplementary file 1 [file 1c7e6d9edb7a4a0d127247c6.xlsx]

## Sheet: Table S1
Gene Information							Differential m6A modification analysis							Differential gene expression analysis						Gene types
Entrez.ID	Uniprot.Accession	Uniprot.Description	Uniprot.GO	Uniprot.Function	keyword_gene	keyword_GO	Peak.Locus	log2.FC.DMR-2hpi	log2.FC.DMR-6hpi	log2.FC.DMR-24hpi	FDR.DMR-2hpi	FDR.DMR-6hpi	FDR.DMR-24hpi	log2.FC.DEG-2hpi	log2.FC.DEG-6hpi	log2.FC.DEG-24hpi	FDR.DEG-2hpi	FDR.DEG-6hpi	FDR.DEG-24hpi	Gene.Type-2hpi	Gene.Type-6hpi	Gene.Type-24hpi
A4GALT	A0A0D9SD56	Lactosylceramide 4-alpha-galactosyltransferase (EC 2.4.1.228) (Alpha-1,4-N-acetylglucosaminyltransferase) (Alpha-1,4-galactosyltransferase) (Globotriaosylceramide synthase) (UDP-galactose:beta-D-galactosyl-beta1-R 4-alpha-D-galactosyltransferase)	Golgi membrane [GO:0000139]; lactosylceramide 4-alpha-galactosyltransferase activity [GO:0050512]; toxic substance binding [GO:0015643]; globoside biosynthetic process [GO:0001576]; plasma membrane organization [GO:0007009]	-	-	-	exon (XM_007975987.2, exon 3 of 3)	-1.43235	-	-	6.66919e-173	-	-	-	-	-3.21487	-	-	3.38843e-05	DMR	-	DEG
AAMDC	A0A0D9QUZ2	Adipogenesis associated Mth938 domain containing	cytoplasm [GO:0005737]; positive regulation of fat cell differentiation [GO:0045600]	-	-	-	-	-	-	-	-	-	-	-	-	-2.04388	-	-	0.0154317	-	-	DEG
AAR2	A0A0D9RCD9	Protein AAR2 homolog (AAR2 splicing factor homolog)	spliceosomal tri-snRNP complex assembly [GO:0000244]	Component of the U5 snRNP complex that is required for spliceosome assembly and for pre-mRNA splicing. {ECO:0000256|ARBA:ARBA00003708}.	-	-	exon (XM_007963964.2, exon 3 of 4)	-1.23097	-	-	0.00709314	-	-	-	-	-	-	-	-	DMR	-	-
AAR2	A0A0D9RCD9	Protein AAR2 homolog (AAR2 splicing factor homolog)	spliceosomal tri-snRNP complex assembly [GO:0000244]	Component of the U5 snRNP complex that is required for spliceosome assembly and for pre-mRNA splicing. {ECO:0000256|ARBA:ARBA00003708}.	-	-	exon (XM_007963964.2, exon 4 of 4)	-1.18556	-	-	0.000694507	-	-	-	-	-	-	-	-	DMR	-	-
AARS1	-	-	-	-	-	-	TTS (XM_007993649.2)	-1.07562	-	-	0.00611943	-	-	-	-	-	-	-	-	DMR	-	-
AASDH	A0A0D9QYE4	Aminoadipate-semialdehyde dehydrogenase	nucleotide binding [GO:0000166]; amino acid activation for nonribosomal peptide biosynthetic process [GO:0043041]; beta-alanine metabolic process [GO:0019482]; lipid metabolic process [GO:0006629]	-	-	-	exon (XM_007998630.2, exon 1 of 15)	1.09242	-	-	0.0206008	-	-	-	-	-	-	-	-	DMR	-	-
AATF	A0A0D9R1B7	Apoptosis antagonizing transcription factor	cytoplasm [GO:0005737]; nucleolus [GO:0005730]; nucleoplasm [GO:0005654]; small-subunit processome [GO:0032040]; transcription regulator complex [GO:0005667]; leucine zipper domain binding [GO:0043522]; cell adhesion [GO:0007155]; embryonic cleavage [GO:0040016]; negative regulation of amyloid precursor protein biosynthetic process [GO:0042985]; negative regulation of apoptotic signaling pathway …	-	-	-	-	-	-	-	-	-	-	-	-	-1.15626	-	-	0.0163092	-	-	DEG
ABCB4	-	-	-	-	-	-	-	-	-	-	-	-	-	-	-	3.25925	-	-	0.00161023	-	-	DEG
ABCC2	A0A0D9R062	ABC-type glutathione-S-conjugate transporter (EC 7.6.2.3)	apical plasma membrane [GO:0016324]; cell surface [GO:0009986]; intercellular canaliculus [GO:0046581]; ABC-type glutathione S-conjugate transporter activity [GO:0015431]; ABC-type xenobiotic transporter activity [GO:0008559]; ATP binding [GO:0005524]; ATP hydrolysis activity [GO:0016887]; bilirubin transmembrane transporter activity [GO:0015127]; bile acid and bile salt transport [GO:0015721]; l…	-	-	-	exon (XM_038009430.1, exon 23 of 34)	-	1.01584	-	-	0.0363874	-	-	-	-	-	-	-	-	DMR	-
ABCC3	A0A0D9QZK1	ABC-type glutathione-S-conjugate transporter (EC 7.6.2.3)	basolateral plasma membrane [GO:0016323]; ABC-type glutathione S-conjugate transporter activity [GO:0015431]; ABC-type xenobiotic transporter activity [GO:0008559]; ATP binding [GO:0005524]; ATP hydrolysis activity [GO:0016887]; glucuronoside transmembrane transporter activity [GO:0015164]; icosanoid transmembrane transporter activity [GO:0071714]; leukotriene transport [GO:0071716]; xenobiotic t…	-	-	-	-	-	-	-	-	-	-	-	-	-1.53789	-	-	1.77238e-05	-	-	DEG
ABCC5	A0A0D9RM21	ATP binding cassette subfamily C member 5	apical plasma membrane [GO:0016324]; basolateral plasma membrane [GO:0016323]; ABC-type xenobiotic transporter activity [GO:0008559]; ATP binding [GO:0005524]; ATP hydrolysis activity [GO:0016887]; carbohydrate derivative transmembrane transporter activity [GO:1901505]; efflux transmembrane transporter activity [GO:0015562]; glutathione transmembrane transporter activity [GO:0034634]; heme transm…	-	-	-	-	-	-	-	-	-	-	-	-	1.62218	-	-	2.92874e-08	-	-	DEG
ABCC9	A0A0D9R6F4	ATP binding cassette subfamily C member 9	inward rectifying potassium channel [GO:0008282]; mitochondrion [GO:0005739]; sarcolemma [GO:0042383]; sarcomere [GO:0030017]; ABC-type transporter activity [GO:0140359]; ATP binding [GO:0005524]; ATP hydrolysis activity [GO:0016887]; potassium channel activity [GO:0005267]; protein-containing complex binding [GO:0044877]; sulfonylurea receptor activity [GO:0008281]; transmembrane transporter bin…	-	-	GO:0051607~defense response to virus;GO:0009615~response to virus;GO:0009615~response to virus	exon (XM_007967878.2, exon 38 of 40)	1.18128	-	-	3.37542e-15	-	-	-	-	-	-	-	-	DMR	-	-
ABCC9	A0A0D9R6F4	ATP binding cassette subfamily C member 9	inward rectifying potassium channel [GO:0008282]; mitochondrion [GO:0005739]; sarcolemma [GO:0042383]; sarcomere [GO:0030017]; ABC-type transporter activity [GO:0140359]; ATP binding [GO:0005524]; ATP hydrolysis activity [GO:0016887]; potassium channel activity [GO:0005267]; protein-containing complex binding [GO:0044877]; sulfonylurea receptor activity [GO:0008281]; transmembrane transporter bin…	-	-	GO:0051607~defense response to virus;GO:0009615~response to virus;GO:0009615~response to virus	TTS (XM_037990271.1)	1.44303	1.07923	-	3.82388e-23	1.81655e-08	-	-	-	-	-	-	-	DMR	DMR	-
ABCE1	A0A0D9S172	ATP binding cassette subfamily E member 1	cytosolic ribosome [GO:0022626]; mitochondrion [GO:0005739]; ATP binding [GO:0005524]; ATP hydrolysis activity [GO:0016887]; CTPase activity [GO:0043273]; endoribonuclease inhibitor activity [GO:0060698]; GTPase activity [GO:0003924]; rescue of stalled ribosome [GO:0072344]; translational termination [GO:0006415]	-	-	-	promoter-TSS (XM_007999898.2)	1.02286	-	-	2.07943e-06	-	-	-	1.02234	-	-	0.0136195	-	DMR	DEG	-
ABHD17A	A0A0D9RHL2	Abhydrolase domain containing 17A, depalmitoylase	endosome membrane [GO:0010008]; nuclear speck [GO:0016607]; plasma membrane [GO:0005886]; palmitoyl-(protein) hydrolase activity [GO:0008474]; negative regulation of NLRP3 inflammasome complex assembly [GO:1900226]; protein localization to membrane [GO:0072657]; regulation of postsynapse organization [GO:0099175]	-	-	-	exon (XM_007994668.2, exon 5 of 5)	-1.07222	-	-	3.01509e-22	-	-	-	-	-	-	-	-	DMR	-	-
ABHD4	A0A0D9RUN8	Abhydrolase domain containing 4, N-acyl phospholipase B	lipid droplet [GO:0005811]; mitochondrion [GO:0005739]; lysophosphatidic acid acyltransferase activity [GO:0042171]; lysophospholipase activity [GO:0004622]; lipid homeostasis [GO:0055088]; phosphatidic acid biosynthetic process [GO:0006654]	-	-	-	-	-	-	-	-	-	-	-	-	-1.48904	-	-	0.000474687	-	-	DEG
ABI1	A0A0D9RHT9	Abl interactor 1	cytoskeleton [GO:0005856]; filopodium tip [GO:0032433]; lamellipodium [GO:0030027]; neuron projection [GO:0043005]; SCAR complex [GO:0031209]; cadherin binding [GO:0045296]; protein tyrosine kinase activator activity [GO:0030296]; SH3 domain binding [GO:0017124]; signaling adaptor activity [GO:0035591]; dendrite morphogenesis [GO:0048813]; lamellipodium morphogenesis [GO:0072673]; megakaryocyte d…	-	-	-	exon (XM_008002578.2, exon 12 of 12)	-	1.0505	-	-	0.000262511	-	-	-	-	-	-	-	-	DMR	-
ABITRAM	A0A0D9RGC1	Protein Abitram (Actin-binding transcription modulator) (Protein Simiate)	dendrite [GO:0030425]; filopodium tip [GO:0032433]; growth cone [GO:0030426]; lamellipodium [GO:0030027]; nuclear speck [GO:0016607]; actin filament binding [GO:0051015]; actin monomer binding [GO:0003785]; dendrite morphogenesis [GO:0048813]; regulation of actin filament polymerization [GO:0030833]; regulation of filopodium assembly [GO:0051489]	-	-	-	-	-	-	-	-	-	-	-	-	-1.77125	-	-	0.0122837	-	-	DEG
ABL1	A0A0D9RQJ3	Tyrosine-protein kinase (EC 2.7.10.2)	actin cytoskeleton [GO:0015629]; cell leading edge [GO:0031252]; cytosol [GO:0005829]; nuclear body [GO:0016604]; nucleolus [GO:0005730]; perinuclear region of cytoplasm [GO:0048471]; protein-containing complex [GO:0032991]; actin filament binding [GO:0051015]; ATP binding [GO:0005524]; bubble DNA binding [GO:0000405]; ephrin receptor binding [GO:0046875]; four-way junction DNA binding [GO:000040…	-	-	GO:0002764~immune response-regulating signaling pathway;GO:0006955~immune response;GO:0050776~regulation of immune response;GO:0050778~positive regulation of immune response;GO:0002520~immune system development;GO:0002376~immune system process;GO:0002252~immune effector process;GO:0002682~regulation of immune system process;GO:0002684~positive regulation of immune system process;GO:0002520~immune…	exon (XM_008005916.2, exon 1 of 11)	-1.40461	-	-	9.66448e-05	-	-	-	-	-	-	-	-	DMR	-	-
ABL1	A0A0D9RQJ3	Tyrosine-protein kinase (EC 2.7.10.2)	actin cytoskeleton [GO:0015629]; cell leading edge [GO:0031252]; cytosol [GO:0005829]; nuclear body [GO:0016604]; nucleolus [GO:0005730]; perinuclear region of cytoplasm [GO:0048471]; protein-containing complex [GO:0032991]; actin filament binding [GO:0051015]; ATP binding [GO:0005524]; bubble DNA binding [GO:0000405]; ephrin receptor binding [GO:0046875]; four-way junction DNA binding [GO:000040…	-	-	GO:0002764~immune response-regulating signaling pathway;GO:0006955~immune response;GO:0050776~regulation of immune response;GO:0050778~positive regulation of immune response;GO:0002520~immune system development;GO:0002376~immune system process;GO:0002252~immune effector process;GO:0002682~regulation of immune system process;GO:0002684~positive regulation of immune system process;GO:0002520~immune…	exon (XM_008005916.2, exon 11 of 11)	-	-1.45966	-	-	0.00624326	-	-	-	-	-	-	-	-	DMR	-
ABL2	A0A0D9RI41	Tyrosine-protein kinase (EC 2.7.10.2)	cytosol [GO:0005829]; ATP binding [GO:0005524]; histone H2AXY142 kinase activity [GO:0140801]; histone H3Y41 kinase activity [GO:0035401]; magnesium ion binding [GO:0000287]; manganese ion binding [GO:0030145]; non-membrane spanning protein tyrosine kinase activity [GO:0004715]; phosphotyrosine residue binding [GO:0001784]; cellular response to retinoic acid [GO:0071300]; phospholipase C-activati…	-	-	-	-	-	-	-	-	-	-	-	-	1.47991	-	-	0.000160378	-	-	DEG
ABR	A0A0D9RNP0	Active breakpoint cluster region-related protein	axon [GO:0030424]; dendritic spine [GO:0043197]; membrane [GO:0016020]; GTPase activator activity [GO:0005096]; guanyl-nucleotide exchange factor activity [GO:0005085]; signal transduction [GO:0007165]	-	-	-	promoter-TSS (XM_037987870.1)	-	1.0261	-	-	1.36835e-05	-	-	-	-	-	-	-	-	DMR	-
ABRACL	A0A0D9RWU5	Costars family protein ABRACL (ABRA C-terminal-like protein)	regulation of actin filament-based process [GO:0032970]	-	-	-	exon (XM_008006851.2, exon 3 of 3)	-	1.05051	-	-	0.0034107	-	-	-	-2.73318	-	-	0.0104991	-	DMR	DEG
ACAA2	A0A0D9RZN3	Acetyl-CoA acyltransferase 2	mitochondrion [GO:0005739]; acetyl-CoA C-acetyltransferase activity [GO:0003985]; fatty acyl-CoA hydrolase activity [GO:0047617]; cellular response to hypoxia [GO:0071456]; fatty acid beta-oxidation [GO:0006635]; negative regulation of mitochondrial membrane permeability involved in apoptotic process [GO:1902109]; negative regulation of mitochondrial outer membrane permeabilization involved in ap…	-	-	-	-	-	-	-	-	-	-	-	-	-2.23088	-	-	5.54311e-05	-	-	DEG
ACAD11	A0A0D9RDW0	Acyl-CoA dehydrogenase family member 11	mitochondrial membrane [GO:0031966]; nucleus [GO:0005634]; peroxisome [GO:0005777]; flavin adenine dinucleotide binding [GO:0050660]; long-chain fatty acyl-CoA dehydrogenase activity [GO:0004466]; medium-chain fatty acyl-CoA dehydrogenase activity [GO:0070991]; very-long-chain fatty acyl-CoA dehydrogenase activity [GO:0017099]; fatty acid beta-oxidation using acyl-CoA dehydrogenase [GO:0033539]	Acyl-CoA dehydrogenase, that exhibits maximal activity towards saturated C22-CoA. Probably participates in beta-oxydation and energy production but could also play a role in the metabolism of specific fatty acids to control fatty acids composition of cellular lipids in brain. {ECO:0000256|ARBA:ARBA00046026}.	-	-	-	-	-	-	-	-	-	-	-	-1.65381	-	-	0.000247847	-	-	DEG
ACAD8	A0A0D9S4X9	Acyl-CoA dehydrogenase family member 8	mitochondrion [GO:0005739]; acyl-CoA dehydrogenase activity [GO:0003995]; flavin adenine dinucleotide binding [GO:0050660]; lipid metabolic process [GO:0006629]	-	-	-	-	-	-	-	-	-	-	-	-	1.07494	-	-	0.025876	-	-	DEG
ACAD9	A0A0D9R8F2	Acyl-CoA dehydrogenase family member 9	dendrite [GO:0030425]; mitochondrial inner membrane [GO:0005743]; nucleus [GO:0005634]; flavin adenine dinucleotide binding [GO:0050660]; long-chain fatty acyl-CoA dehydrogenase activity [GO:0004466]; medium-chain fatty acyl-CoA dehydrogenase activity [GO:0070991]; long-chain fatty acid metabolic process [GO:0001676]; medium-chain fatty acid metabolic process [GO:0051791]; mitochondrial respirato…	-	-	-	-	-	-	-	-	-	-	-	-	-1.41887	-	-	8.93937e-05	-	-	DEG
ACADS	A0A0D9S4L4	short-chain acyl-CoA dehydrogenase (EC 1.3.8.1) (Butyryl-CoA dehydrogenase)	centrosome [GO:0005813]; mitochondrion [GO:0005739]; nucleoplasm [GO:0005654]; acyl-CoA dehydrogenase activity [GO:0003995]; flavin adenine dinucleotide binding [GO:0050660]; butyrate catabolic process [GO:0046359]; fatty acid beta-oxidation using acyl-CoA dehydrogenase [GO:0033539]	-	-	-	exon (XM_008004967.2, exon 10 of 10)	-1.21997	-	-	1.07666e-05	-	-	-	-	-	-	-	-	DMR	-	-
ACADS	A0A0D9S4L4	short-chain acyl-CoA dehydrogenase (EC 1.3.8.1) (Butyryl-CoA dehydrogenase)	centrosome [GO:0005813]; mitochondrion [GO:0005739]; nucleoplasm [GO:0005654]; acyl-CoA dehydrogenase activity [GO:0003995]; flavin adenine dinucleotide binding [GO:0050660]; butyrate catabolic process [GO:0046359]; fatty acid beta-oxidation using acyl-CoA dehydrogenase [GO:0033539]	-	-	-	exon (XM_008004967.2, exon 7 of 10)	-1.33512	-	-	0.0123535	-	-	-	-	-	-	-	-	DMR	-	-
ACADSB	A0A0D9QX02	Short/branched chain specific acyl-CoA dehydrogenase, mitochondrial (EC 1.3.8.5) (2-methyl branched chain acyl-CoA dehydrogenase) (2-methylbutyryl-coenzyme A dehydrogenase)	mitochondrion [GO:0005739]; flavin adenine dinucleotide binding [GO:0050660]; identical protein binding [GO:0042802]; short-chain 2-methyl fatty acyl-CoA dehydrogenase activity [GO:0003853]; fatty acid metabolic process [GO:0006631]; isoleucine catabolic process [GO:0006550]	-	-	-	exon (XM_007964320.2, exon 4 of 11)	1.03164	-	-	1.45533e-09	-	-	-	-	-1.79883	-	-	0.00521032	DMR	-	DEG
ACADSB	A0A0D9QX02	Short/branched chain specific acyl-CoA dehydrogenase, mitochondrial (EC 1.3.8.5) (2-methyl branched chain acyl-CoA dehydrogenase) (2-methylbutyryl-coenzyme A dehydrogenase)	mitochondrion [GO:0005739]; flavin adenine dinucleotide binding [GO:0050660]; identical protein binding [GO:0042802]; short-chain 2-methyl fatty acyl-CoA dehydrogenase activity [GO:0003853]; fatty acid metabolic process [GO:0006631]; isoleucine catabolic process [GO:0006550]	-	-	-	exon (XM_007964320.2, exon 2 of 11)	1.19169	-	-	4.93273e-07	-	-	-	-	-1.79883	-	-	0.00521032	DMR	-	DEG
ACAT1	A0A0D9S2G9	Acetyl-CoA acetyltransferase, mitochondrial (EC 2.3.1.9) (Acetoacetyl-CoA thiolase)	endoplasmic reticulum [GO:0005783]; mitochondrion [GO:0005739]; acetyl-CoA C-acetyltransferase activity [GO:0003985]; cholesterol O-acyltransferase activity [GO:0034736]; potassium ion binding [GO:0030955]; acetyl-CoA biosynthetic process [GO:0006085]; acetyl-CoA catabolic process [GO:0046356]; coenzyme A biosynthetic process [GO:0015937]; fatty acid beta-oxidation [GO:0006635]; isoleucine catabo…	This is one of the enzymes that catalyzes the last step of the mitochondrial beta-oxidation pathway, an aerobic process breaking down fatty acids into acetyl-CoA. Using free coenzyme A/CoA, catalyzes the thiolytic cleavage of medium- to long-chain 3-oxoacyl-CoAs into acetyl-CoA and a fatty acyl-CoA shortened by two carbon atoms. The activity of the enzyme is reversible and it can also catalyze th…	-	-	-	-	-	-	-	-	-	-	-	-2.50948	-	-	0.00317319	-	-	DEG
ACBD3	A0A0D9RUW7	Acyl-CoA binding domain containing 3	Golgi membrane [GO:0000139]; fatty-acyl-CoA binding [GO:0000062]; protein kinase A regulatory subunit binding [GO:0034237]	-	-	-	exon (XM_007988271.2, exon 1 of 8)	1.33707	-	-	7.78752e-28	-	-	-	-	-	-	-	-	DMR	-	-
ACO2	A0A0D9R0H6	Aconitate hydratase, mitochondrial (Aconitase) (EC 4.2.1.3)	cytosol [GO:0005829]; mitochondrial matrix [GO:0005759]; 4 iron, 4 sulfur cluster binding [GO:0051539]; aconitate hydratase activity [GO:0003994]; iron ion binding [GO:0005506]; citrate metabolic process [GO:0006101]; tricarboxylic acid cycle [GO:0006099]	Catalyzes the isomerization of citrate to isocitrate via cis-aconitate. {ECO:0000256|ARBA:ARBA00003113}.	-	-	-	-	-	-	-	-	-	-	-	-2.03614	-	-	3.3413e-06	-	-	DEG
ACOT13	A0A0D9R5Z4	Acyl-CoA thioesterase 13	mitochondrial matrix [GO:0005759]; fatty acyl-CoA hydrolase activity [GO:0047617]; negative regulation of cold-induced thermogenesis [GO:0120163]; protein homotetramerization [GO:0051289]	-	-	-	-	-	-	-	-	-	-	-	-	-2.11262	-	-	0.000141328	-	-	DEG
ACOT6	-	-	-	-	-	-	exon (XM_007987228.2, exon 3 of 3)	-1.7001	-	-	0.0217112	-	-	-	-	-	-	-	-	DMR	-	-
ACOT8	A0A0D9RPZ1	palmitoyl-CoA hydrolase (EC 3.1.2.2)	peroxisomal matrix [GO:0005782]; long-chain fatty acyl-CoA hydrolase activity [GO:0052816]; medium-chain fatty acyl-CoA hydrolase activity [GO:0052815]; acyl-CoA metabolic process [GO:0006637]; dicarboxylic acid catabolic process [GO:0043649]; fatty acid catabolic process [GO:0009062]; negative regulation of CD4 production [GO:0045225]; peroxisome fission [GO:0016559]	-	-	-	promoter-TSS (XM_008015700.2)	1.70838	-	-	0.0257451	-	-	-	-	-	-	-	-	DMR	-	-
ACOT8	A0A0D9RPZ1	palmitoyl-CoA hydrolase (EC 3.1.2.2)	peroxisomal matrix [GO:0005782]; long-chain fatty acyl-CoA hydrolase activity [GO:0052816]; medium-chain fatty acyl-CoA hydrolase activity [GO:0052815]; acyl-CoA metabolic process [GO:0006637]; dicarboxylic acid catabolic process [GO:0043649]; fatty acid catabolic process [GO:0009062]; negative regulation of CD4 production [GO:0045225]; peroxisome fission [GO:0016559]	-	-	-	TTS (XM_008015700.2)	-	-2.07608	-	-	0.0128215	-	-	-	-	-	-	-	-	DMR	-
ACSF2	A0A0D9QZE0	Medium-chain acyl-CoA ligase ACSF2, mitochondrial (EC 6.2.1.2)	medium-chain fatty acid-CoA ligase activity [GO:0031956]; nucleotide binding [GO:0000166]; fatty acid metabolic process [GO:0006631]	Acyl-CoA synthases catalyze the initial reaction in fatty acid metabolism, by forming a thioester with CoA. Has some preference toward medium-chain substrates. Plays a role in adipocyte differentiation. {ECO:0000256|ARBA:ARBA00037247}.	-	-	-	-	-	-	-	-	-	-	-	-1.10095	-	-	0.0139582	-	-	DEG
ACSF3	A0A0D9S2T2	Acyl-CoA synthetase family member 3	mitochondrion [GO:0005739]; nucleoplasm [GO:0005654]; malonyl-CoA synthetase activity [GO:0090409]; medium-chain fatty acid-CoA ligase activity [GO:0031956]; nucleotide binding [GO:0000166]; fatty acid biosynthetic process [GO:0006633]; malonate catabolic process [GO:0090410]	-	-	-	-	-	-	-	-	-	-	-	-	1.05833	-	-	0.0102956	-	-	DEG
ACSL4	-	-	-	-	-	-	exon (XM_037989018.1, exon 3 of 16)	1.10582	-	-	0.00122261	-	-	-	-	-	-	-	-	DMR	-	-
ACSL4	-	-	-	-	-	-	exon (XM_037989018.1, exon 6 of 16)	1.24545	-	-	8.67141e-18	-	-	-	-	-	-	-	-	DMR	-	-
ACSL5	A0A0D9QYM2	Long-chain-fatty-acid--CoA ligase (EC 6.2.1.15) (EC 6.2.1.3) (Acyl-CoA synthetase) (Long-chain acyl-CoA synthetase)	endoplasmic reticulum membrane [GO:0005789]; mitochondrial outer membrane [GO:0005741]; nucleolus [GO:0005730]; nucleoplasm [GO:0005654]; plasma membrane [GO:0005886]; arachidonate-CoA ligase activity [GO:0047676]; ATP binding [GO:0005524]; oleoyl-CoA ligase activity [GO:0090434]; long-chain fatty-acyl-CoA biosynthetic process [GO:0035338]; positive regulation of long-chain fatty acid import acro…	Catalyzes the conversion of long-chain fatty acids to their active form acyl-CoAs for both synthesis of cellular lipids, and degradation via beta-oxidation. {ECO:0000256|RuleBase:RU369030}.	-	-	exon (XM_007964103.2, exon 1 of 21)	-	1.1334	-	-	0.000527173	-	-	-	-	-	-	-	-	DMR	-
ACSS3	A0A0D9QV58	Acyl-CoA synthetase short-chain family member 3, mitochondrial (EC 6.2.1.1) (EC 6.2.1.17) (Acetate--CoA ligase 3) (Propionate--CoA ligase)	mitochondrial matrix [GO:0005759]; acetate-CoA ligase activity [GO:0003987]; nucleotide binding [GO:0000166]; propionate-CoA ligase activity [GO:0050218]; lipid metabolic process [GO:0006629]	-	-	-	-	-	-	-	-	-	-	-	-	-1.72017	-	-	0.0052125	-	-	DEG
ACTA1	A0A0D9RE13	Actin alpha 1, skeletal muscle	actin filament [GO:0005884]; stress fiber [GO:0001725]; striated muscle thin filament [GO:0005865]; skeletal muscle fiber development [GO:0048741]; skeletal muscle thin filament assembly [GO:0030240]	-	-	-	-	-	-	-	-	-	-	-	-	2.95302	-	-	0.000295031	-	-	DEG
ACTB	-	-	-	-	-	-	-	-	-	-	-	-	-	-	-	-3.24439	-	-	2.82279e-07	-	-	DEG
ACTG1	-	-	-	-	-	-	exon (XM_008013242.2, exon 5 of 6)	-1.16019	-	-	2.70844e-301	-	-	-	-	-3.01263	-	-	3.43067e-05	DMR	-	DEG
ACTG2	A0A0D9RSK3	Actin gamma 2, smooth muscle	cell periphery [GO:0071944]; cytoplasm [GO:0005737]; cytoskeleton [GO:0005856]; ATP binding [GO:0005524]; hydrolase activity [GO:0016787]	-	-	-	-	-	-	-	-	-	-	-	-	2.80529	-	-	0.00381517	-	-	DEG
ACTL6A	A0A0D9RKQ2	Actin like 6A	Ino80 complex [GO:0031011]; npBAF complex [GO:0071564]; NuA4 histone acetyltransferase complex [GO:0035267]; nucleoplasm [GO:0005654]; nucleosome [GO:0000786]; plasma membrane [GO:0005886]; SWI/SNF complex [GO:0016514]; chromatin binding [GO:0003682]; blastocyst formation [GO:0001825]; chromatin remodeling [GO:0006338]; nervous system development [GO:0007399]; neural retina development [GO:000340…	-	-	-	exon (XM_007972030.2, exon 9 of 14)	1.15342	-	-	4.91554e-05	-	-	-	-	-2.76727	-	-	8.91693e-07	DMR	-	DEG
ACTN1	A0A0D9RKZ5	Actinin alpha 1	actin filament [GO:0005884]; brush border [GO:0005903]; fascia adherens [GO:0005916]; focal adhesion [GO:0005925]; glutamatergic synapse [GO:0098978]; plasma membrane [GO:0005886]; ruffle [GO:0001726]; stress fiber [GO:0001725]; Z disc [GO:0030018]; actin filament binding [GO:0051015]; calcium ion binding [GO:0005509]; double-stranded RNA binding [GO:0003725]; integrin binding [GO:0005178]; nucle…	-	-	-	-	-	-	-	-	-	-	-	-	-1.82262	-	-	0.0471641	-	-	DEG
ACTR10	A0A0D9RPN2	Actin related protein 10	cytoskeleton [GO:0005856]	-	-	-	-	-	-	-	-	-	-	-	-	-1.27799	-	-	0.00174203	-	-	DEG
ACTR3B	A0A0D9R2J9	Actin related protein 3B	0	-	-	-	-	-	-	-	-	-	-	-	-	1.19678	-	-	0.0108597	-	-	DEG
ACTR6	A0A0D9S136	Actin related protein 6	nucleolus [GO:0005730]; nucleolus organization [GO:0007000]	-	-	-	intron (XM_008004365.2, intron 1 of 10)	1.59574	-	-	0.000436291	-	-	-	-	-	-	-	-	DMR	-	-
ACTR8	A0A0D9RKH0	Actin related protein 8	centrosome [GO:0005813]; Ino80 complex [GO:0031011]; nucleoplasm [GO:0005654]; ATP binding [GO:0005524]; chromatin remodeling [GO:0006338]; DNA recombination [GO:0006310]; DNA repair [GO:0006281]; positive regulation of DNA repair [GO:0045739]; positive regulation of DNA-templated transcription [GO:0045893]; positive regulation of telomere maintenance in response to DNA damage [GO:1904507]; regul…	-	-	-	exon (XM_007984613.2, exon 13 of 13)	-	-1.16747	-	-	0.00820241	-	-	-	-	-	-	-	-	DMR	-
ACY1	A0A0D9RN51	N-acyl-aliphatic-L-amino acid amidohydrolase (EC 3.5.1.14) (N-acyl-L-amino-acid amidohydrolase)	cytoplasm [GO:0005737]; extracellular exosome [GO:0070062]; aminoacylase activity [GO:0004046]; identical protein binding [GO:0042802]; metal ion binding [GO:0046872]; amino acid metabolic process [GO:0006520]	-	-	-	-	-	-	-	-	-	-	-	-	-1.74366	-	-	0.00211134	-	-	DEG
ADAL	A0A0D9R9N1	Adenosine deaminase like	adenosine deaminase activity [GO:0004000]; adenosine catabolic process [GO:0006154]; inosine biosynthetic process [GO:0046103]; nucleotide metabolic process [GO:0009117]; response to alcohol [GO:0097305]	-	-	-	TTS (XM_038009909.1)	-	-1.38532	-	-	3.48136e-07	-	-	-	-	-	-	-	-	DMR	-
ADAM8	A0A0D9R2W8	ADAM metallopeptidase domain 8	cell surface [GO:0009986]; dense core granule membrane [GO:0032127]; phagolysosome [GO:0032010]; plasma membrane [GO:0005886]; podosome [GO:0002102]; specific granule [GO:0042581]; tertiary granule [GO:0070820]; cell adhesion molecule binding [GO:0050839]; immunoglobulin receptor binding [GO:0034987]; metal ion binding [GO:0046872]; metalloendopeptidase activity [GO:0004222]; tumor necrosis facto…	-	-	GO:0002684~positive regulation of immune system process;GO:0002682~regulation of immune system process;GO:0002376~immune system process	-	-	-	-	-	-	-	-	-	3.27964	-	-	4.34928e-05	-	-	DEG
ADAM9	A0A0D9RS75	ADAM metallopeptidase domain 9	extracellular space [GO:0005615]; plasma membrane [GO:0005886]; collagen binding [GO:0005518]; integrin binding [GO:0005178]; laminin binding [GO:0043236]; metal ion binding [GO:0046872]; metalloendopeptidase activity [GO:0004222]; SH3 domain binding [GO:0017124]; cell-cell adhesion mediated by integrin [GO:0033631]; cell-matrix adhesion [GO:0007160]; cellular response to lipopolysaccharide [GO:0…	-	-	-	-	-	-	-	-	-	-	-	-	-1.39309	-	-	0.0143061	-	-	DEG
ADAMTS6	-	-	-	-	-	-	promoter-TSS (XM_037982244.1)	1.01258	-	-	1.35239e-09	-	-	-	-	-	-	-	-	DMR	-	-
ADAMTSL3	A0A0D9RXK4	ADAMTS like 3	extracellular matrix [GO:0031012]; extracellular region [GO:0005576]; intracellular membrane-bounded organelle [GO:0043231]	-	-	-	exon (XM_007990199.2, exon 14 of 30)	1.32226	-	-	0.000221814	-	-	-	-	-	-	-	-	DMR	-	-
ADAMTSL3	A0A0D9RXK4	ADAMTS like 3	extracellular matrix [GO:0031012]; extracellular region [GO:0005576]; intracellular membrane-bounded organelle [GO:0043231]	-	-	-	exon (XM_007990199.2, exon 30 of 30)	2.75768	-	-	3.16268e-08	-	-	-	-	-	-	-	-	DMR	-	-
ADCY3	A0A0D9R832	Adenylate cyclase type 3 (EC 4.6.1.1)	ciliary membrane [GO:0060170]; cytoplasm [GO:0005737]; adenylate cyclase activity [GO:0004016]; ATP binding [GO:0005524]; metal ion binding [GO:0046872]; acrosome reaction [GO:0007340]; adenylate cyclase-activating G protein-coupled receptor signaling pathway [GO:0007189]; cAMP biosynthetic process [GO:0006171]; cellular response to forskolin [GO:1904322]; flagellated sperm motility [GO:0030317];…	Catalyzes the formation of the signaling molecule cAMP in response to G-protein signaling. {ECO:0000256|PIRNR:PIRNR039050}.	-	-	-	-	-	-	-	-	-	-	-	1.28696	-	-	0.0469846	-	-	DEG
ADCY7	A0A0D9QZ92	Adenylate cyclase type 7 (EC 4.6.1.1)	plasma membrane [GO:0005886]; adenylate cyclase activity [GO:0004016]; ATP binding [GO:0005524]; metal ion binding [GO:0046872]; adenylate cyclase-activating G protein-coupled receptor signaling pathway [GO:0007189]; adenylate cyclase-inhibiting G protein-coupled receptor signaling pathway [GO:0007193]; cAMP biosynthetic process [GO:0006171]; cellular response to ethanol [GO:0071361]; cellular re…	Catalyzes the formation of the signaling molecule cAMP in response to G-protein signaling. {ECO:0000256|PIRNR:PIRNR039050}.	-	-	-	-	-	-	-	-	-	-	-	1.50197	-	-	0.000845334	-	-	DEG
ADD3	A0A0D9QYQ6	Adducin 3	brush border [GO:0005903]; cell cortex [GO:0005938]; cell-cell junction [GO:0005911]; condensed nuclear chromosome [GO:0000794]; cytoskeleton [GO:0005856]; plasma membrane [GO:0005886]; postsynaptic density [GO:0014069]; actin filament binding [GO:0051015]; calmodulin binding [GO:0005516]; structural constituent of cytoskeleton [GO:0005200]; barbed-end actin filament capping [GO:0051016]	-	-	-	-	-	-	-	-	-	-	-	-	-1.7731	-	-	0.00180081	-	-	DEG
ADGRA3	A0A0D9RVI1	Adhesion G protein-coupled receptor A3	external side of plasma membrane [GO:0009897]; G protein-coupled receptor activity [GO:0004930]; cell surface receptor signaling pathway [GO:0007166]	-	-	-	-	-	-	-	-	-	-	-	-	-1.29658	-	-	0.00766581	-	-	DEG
ADGRF2	-	-	-	-	-	-	exon (XM_007972313.2, exon 6 of 10)	-1.17581	-	-	0.000756356	-	-	-	-	-	-	-	-	DMR	-	-
ADGRG1	A0A0D9QXV0	Adhesion G-protein coupled receptor G1 (G-protein coupled receptor 56)	extracellular region [GO:0005576]; glial limiting end-foot [GO:0097451]; membrane raft [GO:0045121]; plasma membrane [GO:0005886]; collagen binding [GO:0005518]; extracellular matrix binding [GO:0050840]; G protein-coupled receptor activity [GO:0004930]; heparin binding [GO:0008201]; adenylate cyclase-activating G protein-coupled receptor signaling pathway [GO:0007189]; angiogenesis [GO:0001525];…	-	-	-	-	-	-	-	-	-	-	-	-	-2.53238	-	-	4.45289e-07	-	-	DEG
ADH5	A0A0D9QVT7	S-(hydroxymethyl)glutathione dehydrogenase (EC 1.1.1.284)	cytosol [GO:0005829]; mitochondrion [GO:0005739]; alcohol dehydrogenase (NAD+) activity [GO:0004022]; fatty acid binding [GO:0005504]; formaldehyde dehydrogenase (NAD+) activity [GO:0018467]; identical protein binding [GO:0042802]; S-(hydroxymethyl)glutathione dehydrogenase (NAD+) activity [GO:0106322]; S-(hydroxymethyl)glutathione dehydrogenase (NADP+) activity [GO:0106321]; S-nitrosoglutathione…	Catalyzes the oxidation of long-chain primary alcohols and the oxidation of S-(hydroxymethyl) glutathione. Also oxidizes long chain omega-hydroxy fatty acids, such as 20-HETE, producing both the intermediate aldehyde, 20-oxoarachidonate and the end product, a dicarboxylic acid, (5Z,8Z,11Z,14Z)-eicosatetraenedioate. Class-III ADH is remarkably ineffective in oxidizing ethanol. Required for clearan…	-	-	exon (XM_037990139.1, exon 6 of 9)	-	-1.09814	-	-	1.49379e-26	-	-	-	-2.12601	-	-	0.000432221	-	DMR	DEG
ADK	A0A0D9R9K8	Adenosine kinase (AK) (EC 2.7.1.20) (Adenosine 5'-phosphotransferase)	cytosol [GO:0005829]; nucleoplasm [GO:0005654]; plasma membrane [GO:0005886]; adenosine kinase activity [GO:0004001]; ATP binding [GO:0005524]; deoxyadenosine kinase activity [GO:0004136]; AMP salvage [GO:0044209]; dAMP salvage [GO:0106383]; dATP biosynthetic process [GO:0006175]; GMP salvage [GO:0032263]; purine nucleobase metabolic process [GO:0006144]; purine ribonucleoside salvage [GO:0006166]	ATP dependent phosphorylation of adenosine and other related nucleoside analogs to monophosphate derivatives. {ECO:0000256|RuleBase:RU368116}.	-	-	promoter-TSS (XM_007962951.2)	1.15023	-	-	6.31005e-10	-	-	-	-	-	-	-	-	DMR	-	-
ADNP2	A0A0D9S084	ADNP homeobox 2	nucleus [GO:0005634]; DNA binding [GO:0003677]; metal ion binding [GO:0046872]; nervous system development [GO:0007399]; regulation of gene expression [GO:0010468]	-	-	-	-	-	-	-	-	-	-	-	-	1.08164	-	-	0.00732411	-	-	DEG
ADORA1	A0A0D9RP92	Adenosine receptor A1	dendritic spine [GO:0043197]; plasma membrane [GO:0005886]; G protein-coupled adenosine receptor activity [GO:0001609]; excitatory postsynaptic potential [GO:0060079]; leukocyte migration [GO:0050900]; long-term synaptic depression [GO:0060292]; mucus secretion [GO:0070254]; negative regulation of inflammatory response [GO:0050728]; negative regulation of leukocyte migration [GO:0002686]; negativ…	Receptor for adenosine. The activity of this receptor is mediated by G proteins which inhibit adenylyl cyclase. {ECO:0000256|ARBA:ARBA00025048, ECO:0000256|RuleBase:RU201114}.	-	GO:0002682~regulation of immune system process;GO:0002376~immune system process;GO:0002683~negative regulation of immune system process	-	-	-	-	-	-	-	-	-	-2.76982	-	-	0.0102498	-	-	DEG
ADRB2	A0A0D9SEC3	Beta-2 adrenergic receptor (Beta-2 adrenoceptor) (Beta-2 adrenoreceptor)	apical plasma membrane [GO:0016324]; early endosome [GO:0005769]; Golgi apparatus [GO:0005794]; neuronal dense core vesicle [GO:0098992]; nucleus [GO:0005634]; receptor complex [GO:0043235]; adenylate cyclase binding [GO:0008179]; amyloid-beta binding [GO:0001540]; beta2-adrenergic receptor activity [GO:0004941]; norepinephrine binding [GO:0051380]; potassium channel regulator activity [GO:001545…	Beta-adrenergic receptors mediate the catecholamine-induced activation of adenylate cyclase through the action of G proteins. The beta-2-adrenergic receptor binds epinephrine with an approximately 30-fold greater affinity than it does norepinephrine. {ECO:0000256|RuleBase:RU368057}.	-	-	exon (XM_008014922.2, exon 1 of 1)	2.6325	-	-	0.000689362	-	-	-	-	-	-	-	-	DMR	-	-
AEBP2	A0A0D9R6V8	AE binding protein 2	ESC/E(Z) complex [GO:0035098]; metal ion binding [GO:0046872]; transcription coregulator activity [GO:0003712]; chromatin organization [GO:0006325]; negative regulation of transcription by RNA polymerase II [GO:0000122]	-	-	-	exon (XM_007967841.2, exon 9 of 9)	-	1.36571	-	-	7.73597e-05	-	-	-	-	-	-	-	-	DMR	-
AEN	A0A0D9RX94	Apoptosis enhancing nuclease	nuclear membrane [GO:0031965]; nucleolus [GO:0005730]; nucleoplasm [GO:0005654]; DNA exonuclease activity [GO:0004529]; nucleic acid binding [GO:0003676]; intrinsic apoptotic signaling pathway in response to DNA damage by p53 class mediator [GO:0042771]; response to ionizing radiation [GO:0010212]	-	-	-	-	-	-	-	-	-	-	-	-	1.38084	-	-	0.00769459	-	-	DEG
AFDN	A0A0D9RHZ1	Afadin, adherens junction formation factor	adherens junction [GO:0005912]; cytosol [GO:0005829]; nuclear speck [GO:0016607]; plasma membrane [GO:0005886]; cell adhesion molecule binding [GO:0050839]; cell adhesion [GO:0007155]; regulation of protein localization [GO:0032880]; signal transduction [GO:0007165]	-	-	-	-	-	-	-	-	-	-	-	-	1.15253	-	-	0.0441779	-	-	DEG
AFG3L2	A0A0D9RY48	AFG3 like matrix AAA peptidase subunit 2	m-AAA complex [GO:0005745]; ATP binding [GO:0005524]; ATP hydrolysis activity [GO:0016887]; ATP-dependent peptidase activity [GO:0004176]; metalloendopeptidase activity [GO:0004222]; zinc ion binding [GO:0008270]; axonogenesis [GO:0007409]; calcium import into the mitochondrion [GO:0036444]; cellular response to glutathione [GO:0072753]; cristae formation [GO:0042407]; membrane protein proteolysi…	-	-	-	-	-	-	-	-	-	-	-	-	-1.09566	-	-	0.0275406	-	-	DEG
AGAP3	-	-	-	-	-	-	-	-	-	-	-	-	-	-	-	1.03287	-	-	0.0404674	-	-	DEG
AGER	A0A0D9RAC3	Advanced glycosylation end-product specific receptor	apical plasma membrane [GO:0016324]; cell junction [GO:0030054]; fibrillar center [GO:0001650]; amyloid-beta binding [GO:0001540]; identical protein binding [GO:0042802]; laminin receptor activity [GO:0005055]; protein-containing complex binding [GO:0044877]; S100 protein binding [GO:0044548]; signaling receptor activity [GO:0038023]; astrocyte activation [GO:0048143]; cellular response to amyloi…	-	-	-	-	-	-	-	-	-	-	-	-	2.263	-	-	0.0010475	-	-	DEG
AGFG1	A0A0D9R470	ArfGAP with FG repeats 1	cytoplasmic vesicle [GO:0031410]; membrane [GO:0016020]; GTPase activator activity [GO:0005096]; acrosome assembly [GO:0001675]; intermediate filament organization [GO:0045109]; spermatid nucleus differentiation [GO:0007289]	-	-	-	exon (XM_007966498.2, exon 14 of 14)	-	1.36864	-	-	0.000629451	-	-	-	1.22556	-	-	0.013047	-	DMR	DEG
AGMAT	A0A0D9S8I2	Agmatinase	agmatinase activity [GO:0008783]; arginase activity [GO:0004053]; guanidinobutyrase activity [GO:0047971]; guanidinopropionase activity [GO:0047972]; metal ion binding [GO:0046872]; putrescine biosynthetic process from arginine, using agmatinase [GO:0033389]	-	-	-	exon (XM_007980433.2, exon 7 of 7)	-1.0427	-	-	0.0133056	-	-	-	-	-	-	-	-	DMR	-	-
AGPAT1	A0A0D9RAA8	1-acyl-sn-glycerol-3-phosphate acyltransferase (EC 2.3.1.51)	endoplasmic reticulum [GO:0005783]; membrane [GO:0016020]; 1-acylglycerol-3-phosphate O-acyltransferase activity [GO:0003841]; phosphatidic acid biosynthetic process [GO:0006654]; positive regulation of cytokine production [GO:0001819]	Converts 1-acyl-sn-glycerol-3-phosphate (lysophosphatidic acid or LPA) into 1,2-diacyl-sn-glycerol-3-phosphate (phosphatidic acid or PA) by incorporating an acyl moiety at the sn-2 position of the glycerol backbone. {ECO:0000256|ARBA:ARBA00004086}.	-	-	-	-	-	-	-	-	-	-	-	-1.17164	-	-	0.003856	-	-	DEG
AGPAT2	A0A0D9RTM2	1-acyl-sn-glycerol-3-phosphate acyltransferase (EC 2.3.1.51)	endoplasmic reticulum membrane [GO:0005789]; 1-acylglycerol-3-phosphate O-acyltransferase activity [GO:0003841]; phosphatidic acid biosynthetic process [GO:0006654]; positive regulation of cytokine production [GO:0001819]; triglyceride biosynthetic process [GO:0019432]	Converts 1-acyl-sn-glycerol-3-phosphate (lysophosphatidic acid or LPA) into 1,2-diacyl-sn-glycerol-3-phosphate (phosphatidic acid or PA) by incorporating an acyl moiety at the sn-2 position of the glycerol backbone. {ECO:0000256|ARBA:ARBA00004086}.	-	-	exon (XM_008005605.2, exon 6 of 6)	-2.13427	-	-	7.26125e-07	-	-	-	-	-	-	-	-	DMR	-	-
AGPAT4	A0A0D9RIM1	1-acyl-sn-glycerol-3-phosphate acyltransferase delta (EC 2.3.1.51) (1-acylglycerol-3-phosphate O-acyltransferase 4) (Lysophosphatidic acid acyltransferase delta)	endoplasmic reticulum membrane [GO:0005789]; mitochondrial outer membrane [GO:0005741]; 1-acylglycerol-3-phosphate O-acyltransferase activity [GO:0003841]; phospholipid biosynthetic process [GO:0008654]	Converts 1-acyl-sn-glycerol-3-phosphate (lysophosphatidic acid or LPA) into 1,2-diacyl-sn-glycerol-3-phosphate (phosphatidic acid or PA) by incorporating an acyl moiety at the sn-2 position of the glycerol backbone. Exhibits high acyl-CoA specificity for polyunsaturated fatty acyl-CoA, especially docosahexaenoyl-CoA (22:6-CoA, DHA-CoA). {ECO:0000256|ARBA:ARBA00045404}.	-	-	-	-	-	-	-	-	-	-	-	1.27352	-	-	0.0287704	-	-	DEG
AGRN	A0A0D9S8Z7	Agrin	basement membrane [GO:0005604]; extracellular region [GO:0005576]; plasma membrane [GO:0005886]; calcium ion binding [GO:0005509]; laminin binding [GO:0043236]; cell differentiation [GO:0030154]; neuromuscular junction development [GO:0007528]; receptor clustering [GO:0043113]; regulation of synaptic assembly at neuromuscular junction [GO:0008582]	-	-	-	-	-	-	-	-	-	-	-	-	-2.70369	-	-	2.00602e-16	-	-	DEG
AHCTF1	A0A0D9R9R1	AT-hook containing transcription factor 1	chromatin [GO:0000785]; kinetochore [GO:0000776]; nuclear body [GO:0016604]; nuclear membrane [GO:0031965]; nuclear pore outer ring [GO:0031080]; nuclear pore complex assembly [GO:0051292]; regulation of cytokinesis [GO:0032465]	-	-	-	exon (XM_037986109.1, exon 18 of 36)	1.1776	-	-	0.00363614	-	-	-	-	-	-	-	-	DMR	-	-
AHCY	A0A0D9RI59	Adenosylhomocysteinase	cytosol [GO:0005829]; adenosylhomocysteinase activity [GO:0004013]; one-carbon metabolic process [GO:0006730]; S-adenosylmethionine cycle [GO:0033353]	Catalyzes the hydrolysis of S-adenosyl-L-homocysteine to form adenosine and homocysteine. Binds copper ions. {ECO:0000256|ARBA:ARBA00045926}.	-	-	-	-	-	-	-	-	-	-	-	-2.52183	-	-	6.25756e-16	-	-	DEG
AHCYL2	A0A0D9RC30	Adenosylhomocysteinase like 2	cytosol [GO:0005829]; intracellular membrane-bounded organelle [GO:0043231]; neuron projection [GO:0043005]; one-carbon metabolic process [GO:0006730]; S-adenosylmethionine cycle [GO:0033353]	-	-	-	-	-	-	-	-	-	-	-	-	1.19277	-	-	0.00457448	-	-	DEG
AHDC1	A0A0D9S915	AT-hook DNA binding motif containing 1	nucleus [GO:0005634]; DNA-binding transcription factor activity [GO:0003700]; promoter-enhancer loop anchoring activity [GO:0140585]; mesoderm formation [GO:0001707]; skin morphogenesis [GO:0043589]	-	-	-	promoter-TSS (XM_037985652.1)	1.79923	-	-	1.79597e-20	-	-	-	-	-	-	-	-	DMR	-	-
AHI1	A0A0D9RW90	Abelson helper integration site 1	adherens junction [GO:0005912]; centrosome [GO:0005813]; ciliary basal body [GO:0036064]; identical protein binding [GO:0042802]; motile cilium assembly [GO:0044458]	-	-	-	-	-	-	-	-	-	-	-	-	1.81761	-	-	0.000541992	-	-	DEG
AHNAK	A0A0D9R2J6	AHNAK nucleoprotein	actin cytoskeleton [GO:0015629]; cell-cell contact zone [GO:0044291]; costamere [GO:0043034]; cytosol [GO:0005829]; extracellular exosome [GO:0070062]; membrane raft [GO:0045121]; nucleus [GO:0005634]; plasma membrane protein complex [GO:0098797]; sarcolemma [GO:0042383]; S100 protein binding [GO:0044548]; structural molecule activity conferring elasticity [GO:0097493]; regulation of RNA splicing…	-	-	-	exon (XM_037997353.1, exon 10 of 82)	-1.00185	-	-	0.000910972	-	-	-	-	-1.53182	-	-	0.00908882	DMR	-	DEG
AHNAK2	-	-	-	-	-	-	exon (XM_037984636.1, exon 56 of 70)	-1.1743	-	-	9.98875e-09	-	-	-	-	-2.11962	-	-	5.45849e-05	DMR	-	DEG
AHNAK2	-	-	-	-	-	-	exon (XM_037984636.1, exon 70 of 70)	-1.19676	-	-	1.0335e-46	-	-	-	-	-2.11962	-	-	5.45849e-05	DMR	-	DEG
AHNAK2	-	-	-	-	-	-	exon (XM_037984636.1, exon 38 of 70)	-2.50037	-	-	7.72484e-08	-	-	-	-	-2.11962	-	-	5.45849e-05	DMR	-	DEG
AHNAK2	-	-	-	-	-	-	exon (XM_037984636.1, exon 21 of 70)	-1.35308	-	-	9.78462e-13	-	-	-	-	-2.11962	-	-	5.45849e-05	DMR	-	DEG
AHNAK2	-	-	-	-	-	-	exon (XM_037984636.1, exon 16 of 70)	-1.08708	-	-	4.83528e-08	-	-	-	-	-2.11962	-	-	5.45849e-05	DMR	-	DEG
AHNAK2	-	-	-	-	-	-	exon (XM_037984636.1, exon 23 of 70)	-1.8732	-	-	3.80713e-06	-	-	-	-	-2.11962	-	-	5.45849e-05	DMR	-	DEG
AHNAK2	-	-	-	-	-	-	exon (XM_037984636.1, exon 26 of 70)	-1.57473	-	-	6.36882e-05	-	-	-	-	-2.11962	-	-	5.45849e-05	DMR	-	DEG
AHNAK2	-	-	-	-	-	-	exon (XM_037984636.1, exon 47 of 70)	-1.50737	-	-	1.599e-10	-	-	-	-	-2.11962	-	-	5.45849e-05	DMR	-	DEG
AHNAK2	-	-	-	-	-	-	exon (XM_037984636.1, exon 54 of 70)	-1.89887	-	-	4.76084e-05	-	-	-	-	-2.11962	-	-	5.45849e-05	DMR	-	DEG
AHNAK2	-	-	-	-	-	-	exon (XM_037984636.1, exon 9 of 70)	-1.30171	-	-	3.61782e-05	-	-	-	-	-2.11962	-	-	5.45849e-05	DMR	-	DEG
AHNAK2	-	-	-	-	-	-	exon (XM_037984636.1, exon 28 of 70)	-1.11567	-	-	4.05572e-07	-	-	-	-	-2.11962	-	-	5.45849e-05	DMR	-	DEG
AHRR	A0A0D9RXX4	Aryl hydrocarbon receptor repressor	aryl hydrocarbon receptor complex [GO:0034751]; cytosol [GO:0005829]; nucleoplasm [GO:0005654]; nuclear receptor activity [GO:0004879]; protein dimerization activity [GO:0046983]; transcription cis-regulatory region binding [GO:0000976]; xenobiotic metabolic process [GO:0006805]	-	-	-	exon (XM_007961068.2, exon 11 of 11)	-1.40946	-	-	1.08286e-12	-	-	-	-	-	-	-	-	DMR	-	-
AHSA1	A0A0D9RH65	Activator of HSP90 ATPase activity 1	cytosol [GO:0005829]; ATPase activator activity [GO:0001671]; Hsp90 protein binding [GO:0051879]; protein-folding chaperone binding [GO:0051087]; protein folding [GO:0006457]	-	-	-	exon (XM_007987406.2, exon 8 of 9)	-1.05487	-	-	1.25565e-10	-	-	-	-	1.61954	-	-	0.0029461	DMR	-	DEG
AIDA	A0A0D9RTV0	Axin interactor, dorsalization associated	cytoplasm [GO:0005737]; membrane [GO:0016020]; phosphatidylinositol binding [GO:0035091]; protein domain specific binding [GO:0019904]; determination of ventral identity [GO:0048264]; negative regulation of JNK cascade [GO:0046329]; negative regulation of protein-containing complex assembly [GO:0031333]	-	-	-	-	-	-	-	-	-	-	-	-	-1.72849	-	-	0.000394067	-	-	DEG
AIFM1	A0A0D9R6M6	Apoptosis inducing factor mitochondria associated 1	cytosol [GO:0005829]; mitochondrial intermembrane space [GO:0005758]; nucleus [GO:0005634]; DNA binding [GO:0003677]; FAD binding [GO:0071949]; NAD(P)H oxidase H2O2-forming activity [GO:0016174]; poly-ADP-D-ribose binding [GO:0072572]; protein dimerization activity [GO:0046983]; intrinsic apoptotic signaling pathway in response to endoplasmic reticulum stress [GO:0070059]; mitochondrial respirato…	-	-	-	-	-	-	-	-	-	-	-	-	-1.68107	-	-	0.000166068	-	-	DEG
AIG1	A0A0D9RWX2	Androgen induced 1	endomembrane system [GO:0012505]; membrane [GO:0016020]; hydrolase activity [GO:0016787]; long-chain fatty acid catabolic process [GO:0042758]	-	-	-	exon (XM_008006812.2, exon 6 of 6)	-	1.22614	-	-	0.000316691	-	-	-	-	-	-	-	-	DMR	-
AIMP1	A0A0D9QVF5	Aminoacyl tRNA synthetase complex interacting multifunctional protein 1	aminoacyl-tRNA synthetase multienzyme complex [GO:0017101]; cell surface [GO:0009986]; cytosol [GO:0005829]; GTPase binding [GO:0051020]; protein homodimerization activity [GO:0042803]; tRNA binding [GO:0000049]; cell-cell signaling [GO:0007267]; leukocyte migration [GO:0050900]; negative regulation of endothelial cell proliferation [GO:0001937]	-	-	-	-	-	-	-	-	-	-	-	-	-1.24001	-	-	0.00100654	-	-	DEG
AJM1	A0A0D9SE91	Apical junction component 1 homolog	apical junction complex [GO:0043296]; plasma membrane [GO:0005886]; cell-cell junction organization [GO:0045216]	-	-	-	-	-	-	-	-	-	-	-	-	2.59252	-	-	0.000498185	-	-	DEG
AK1	A0A0D9RN72	Adenylate kinase isoenzyme 1 (AK 1) (EC 2.7.4.3) (EC 2.7.4.6) (ATP-AMP transphosphorylase 1) (ATP:AMP phosphotransferase) (Adenylate monophosphate kinase) (Myokinase)	cytosol [GO:0005829]; outer dense fiber [GO:0001520]; (deoxy)adenylate kinase activity [GO:0047506]; adenylate kinase activity [GO:0004017]; ATP binding [GO:0005524]; nucleoside diphosphate kinase activity [GO:0004550]; ADP biosynthetic process [GO:0006172]; AMP metabolic process [GO:0046033]; ATP metabolic process [GO:0046034]; nucleoside triphosphate biosynthetic process [GO:0009142]	Catalyzes the reversible transfer of the terminal phosphate group between ATP and AMP. Also displays broad nucleoside diphosphate kinase activity. Plays an important role in cellular energy homeostasis and in adenine nucleotide metabolism. Also catalyzes at a very low rate the synthesis of thiamine triphosphate (ThTP) from thiamine diphosphate (ThDP) and ADP. {ECO:0000256|ARBA:ARBA00045177}.	-	-	exon (XM_008006127.2, exon 5 of 7)	-1.48079	-1.6688	-	5.88749e-07	1.69108e-06	-	-	-	-1.33666	-	-	0.0468371	DMR	DMR	DEG
AK3	A0A0D9R8W5	GTP:AMP phosphotransferase AK3, mitochondrial (EC 2.7.4.10) (Adenylate kinase 3) (AK 3) (Adenylate kinase 3 alpha-like 1)	mitochondrial matrix [GO:0005759]; adenylate kinase activity [GO:0004017]; ATP binding [GO:0005524]; GTP binding [GO:0005525]; nucleoside triphosphate adenylate kinase activity [GO:0046899]; ADP biosynthetic process [GO:0006172]; AMP metabolic process [GO:0046033]; GTP metabolic process [GO:0046039]; ITP metabolic process [GO:0046041]; UTP metabolic process [GO:0046051]	Involved in maintaining the homeostasis of cellular nucleotides by catalyzing the interconversion of nucleoside phosphates. Has GTP:AMP phosphotransferase and ITP:AMP phosphotransferase activities. {ECO:0000256|HAMAP-Rule:MF_03169}.	-	-	exon (XM_007969345.2, exon 5 of 5)	1.68818	1.53836	-	1.02399e-12	3.20114e-16	-	-	-	-1.2363	-	-	0.00563521	DMR	DMR	DEG
AKAP10	A0A0D9R625	A-kinase anchoring protein 10	cytosol [GO:0005829]; mitochondrion [GO:0005739]; plasma membrane [GO:0005886]; protein-containing complex [GO:0032991]; protein kinase A binding [GO:0051018]; protein localization [GO:0008104]	-	-	-	-	-	-	-	-	-	-	-	-	1.3407	-	-	0.000208846	-	-	DEG
AKAP11	A0A0D9RYY9	A-kinase anchoring protein 11	cytosol [GO:0005829]; nucleolus [GO:0005730]; plasma membrane [GO:0005886]; protein kinase A regulatory subunit binding [GO:0034237]; cortical actin cytoskeleton organization [GO:0030866]; protein localization to endosome [GO:0036010]; renal water homeostasis [GO:0003091]	-	-	-	exon (XM_007960249.2, exon 4 of 12)	1.06724	-	-	0.00093116	-	-	-	-	-	-	-	-	DMR	-	-
AKAP12	A0A0D9RP66	A-kinase anchoring protein 12	cytosol [GO:0005829]; plasma membrane [GO:0005886]; Schaffer collateral - CA1 synapse [GO:0098685]; adenylate cyclase binding [GO:0008179]; calmodulin binding [GO:0005516]; protein kinase A binding [GO:0051018]; adenylate cyclase-inhibiting G protein-coupled receptor signaling pathway [GO:0007193]; modulation of chemical synaptic transmission [GO:0050804]; positive regulation of protein kinase A …	-	-	-	exon (XM_008007571.2, exon 1 of 4)	1.28535	-	-	6.20881e-11	-	-	-	-	-1.83534	-	-	0.0318576	DMR	-	DEG
AKAP12	A0A0D9RP66	A-kinase anchoring protein 12	cytosol [GO:0005829]; plasma membrane [GO:0005886]; Schaffer collateral - CA1 synapse [GO:0098685]; adenylate cyclase binding [GO:0008179]; calmodulin binding [GO:0005516]; protein kinase A binding [GO:0051018]; adenylate cyclase-inhibiting G protein-coupled receptor signaling pathway [GO:0007193]; modulation of chemical synaptic transmission [GO:0050804]; positive regulation of protein kinase A …	-	-	-	exon (XM_008007574.2, exon 1 of 3)	2.06615	-	-	5.99695e-25	-	-	-	-	-1.83534	-	-	0.0318576	DMR	-	DEG
AKAP12	A0A0D9RP66	A-kinase anchoring protein 12	cytosol [GO:0005829]; plasma membrane [GO:0005886]; Schaffer collateral - CA1 synapse [GO:0098685]; adenylate cyclase binding [GO:0008179]; calmodulin binding [GO:0005516]; protein kinase A binding [GO:0051018]; adenylate cyclase-inhibiting G protein-coupled receptor signaling pathway [GO:0007193]; modulation of chemical synaptic transmission [GO:0050804]; positive regulation of protein kinase A …	-	-	-	exon (XM_008007571.2, exon 2 of 4)	1.38151	-	-	2.03455e-18	-	-	-	-	-1.83534	-	-	0.0318576	DMR	-	DEG
AKAP17A	A0A0D9RZP4	A-kinase anchoring protein 17A	cytosol [GO:0005829]; nuclear speck [GO:0016607]; protein kinase A binding [GO:0051018]; RNA binding [GO:0003723]; regulation of RNA splicing [GO:0043484]	-	-	-	TTS (XM_008019666.2)	-1.64089	-	-	7.14578e-12	-	-	-	-	1.29817	-	-	0.014892	DMR	-	DEG
AKAP17A	A0A0D9RZP4	A-kinase anchoring protein 17A	cytosol [GO:0005829]; nuclear speck [GO:0016607]; protein kinase A binding [GO:0051018]; RNA binding [GO:0003723]; regulation of RNA splicing [GO:0043484]	-	-	-	exon (XM_008019666.2, exon 4 of 5)	-1.01498	-	-	1.48904e-33	-	-	-	-	1.29817	-	-	0.014892	DMR	-	DEG
AKAP7	A0A0D9RVQ3	A-kinase anchoring protein 7	cytosol [GO:0005829]; hippocampal mossy fiber to CA3 synapse [GO:0098686]; nucleus [GO:0005634]; protein-containing complex [GO:0032991]; protein kinase A regulatory subunit binding [GO:0034237]; protein kinase binding [GO:0019901]; modulation of chemical synaptic transmission [GO:0050804]; regulation of protein kinase A signaling [GO:0010738]	-	-	-	exon (XM_008007036.2, exon 8 of 8)	1.16592	-	-	0.0192686	-	-	-	-	-	-	-	-	DMR	-	-
AKNA	A0A0D9RKH4	AT-hook transcription factor	centriole [GO:0005814]; centrosome [GO:0005813]; cytosol [GO:0005829]; fibrillar center [GO:0001650]; microtubule [GO:0005874]; nucleoplasm [GO:0005654]; epithelial to mesenchymal transition [GO:0001837]; neuroblast delamination [GO:0060234]; neuroblast division in subventricular zone [GO:0021849]; positive regulation of transcription by RNA polymerase II [GO:0045944]; regulation of inflammatory …	-	-	-	exon (XM_007968307.2, exon 3 of 22)	1.74635	-	-	2.26394e-05	-	-	-	-	-	-	-	-	DMR	-	-
AKR1A1	A0A0D9S7F8	Aldo-keto reductase family 1 member A1 (EC 1.1.1.19) (EC 1.1.1.2) (EC 1.1.1.20) (EC 1.1.1.372) (EC 1.1.1.54) (Alcohol dehydrogenase [NADP(+)]) (Aldehyde reductase) (Glucuronate reductase) (Glucuronolactone reductase) (S-nitroso-CoA reductase)	apical plasma membrane [GO:0016324]; cytosol [GO:0005829]; synapse [GO:0045202]; aldose reductase (NADPH) activity [GO:0004032]; allyl-alcohol dehydrogenase activity [GO:0047655]; glucuronolactone reductase activity [GO:0047941]; L-glucuronate reductase activity [GO:0047939]; S-nitrosoglutathione reductase (NADH) activity [GO:0080007]; aldehyde catabolic process [GO:0046185]; cellular detoxificat…	-	-	-	-	-	-	-	-	-	-	-	-	-2.62272	-	-	0.00045653	-	-	DEG
AKT1	A0A0D9RBG0	RAC-alpha serine/threonine-protein kinase (EC 2.7.11.1) (RAC-PK-alpha)	cell-cell junction [GO:0005911]; ciliary basal body [GO:0036064]; cytosol [GO:0005829]; glutamatergic synapse [GO:0098978]; mitochondrial intermembrane space [GO:0005758]; nucleoplasm [GO:0005654]; plasma membrane [GO:0005886]; protein-containing complex [GO:0032991]; spindle [GO:0005819]; vesicle [GO:0031982]; 14-3-3 protein binding [GO:0071889]; 3-phosphoinositide-dependent protein kinase activ…	-	-	GO:0002683~negative regulation of immune system process;GO:0002683~negative regulation of immune system process;GO:0002376~immune system process;GO:0002682~regulation of immune system process;GO:0002376~immune system process;GO:0002682~regulation of immune system process;GO:0002682~regulation of immune system process;GO:0002376~immune system process	TTS (XM_007988001.2)	-1.09248	-	-	6.53494e-11	-	-	-	-	-	-	-	-	DMR	-	-
AKT1	A0A0D9RBG0	RAC-alpha serine/threonine-protein kinase (EC 2.7.11.1) (RAC-PK-alpha)	cell-cell junction [GO:0005911]; ciliary basal body [GO:0036064]; cytosol [GO:0005829]; glutamatergic synapse [GO:0098978]; mitochondrial intermembrane space [GO:0005758]; nucleoplasm [GO:0005654]; plasma membrane [GO:0005886]; protein-containing complex [GO:0032991]; spindle [GO:0005819]; vesicle [GO:0031982]; 14-3-3 protein binding [GO:0071889]; 3-phosphoinositide-dependent protein kinase activ…	-	-	GO:0002683~negative regulation of immune system process;GO:0002683~negative regulation of immune system process;GO:0002376~immune system process;GO:0002682~regulation of immune system process;GO:0002376~immune system process;GO:0002682~regulation of immune system process;GO:0002682~regulation of immune system process;GO:0002376~immune system process	promoter-TSS (XM_007987998.2)	-	1.39499	-	-	1.00177e-08	-	-	-	-	-	-	-	-	DMR	-
AKT2	A0A0D9QUT3	non-specific serine/threonine protein kinase (EC 2.7.11.1)	cell cortex [GO:0005938]; cytosol [GO:0005829]; nucleoplasm [GO:0005654]; ruffle membrane [GO:0032587]; 3-phosphoinositide-dependent protein kinase activity [GO:0004676]; AMP-activated protein kinase activity [GO:0004679]; ATP binding [GO:0005524]; DNA-dependent protein kinase activity [GO:0004677]; eukaryotic translation initiation factor 2alpha kinase activity [GO:0004694]; histone H2AS1 kinase…	-	-	-	exon (XM_007996832.2, exon 14 of 14)	-	1.12678	-	-	0.000374969	-	-	-	-	-	-	-	-	DMR	-
ALB	A0A0D9QXP9	Albumin	blood microparticle [GO:0072562]; endoplasmic reticulum [GO:0005783]; extracellular exosome [GO:0070062]; Golgi apparatus [GO:0005794]; protein-containing complex [GO:0032991]; DNA binding [GO:0003677]; enterobactin binding [GO:1903981]; exogenous protein binding [GO:0140272]; fatty acid binding [GO:0005504]; identical protein binding [GO:0042802]; metal ion binding [GO:0046872]; oxygen binding […	-	-	-	-	-	-	-	-	-	-	-	-	2.57428	-	-	0.0412489	-	-	DEG
ALDH1A1	A0A0D9R755	Aldehyde dehydrogenase 1 family member A1	cytosol [GO:0005829]; 3-deoxyglucosone dehydrogenase activity [GO:0106373]; cellular detoxification of aldehyde [GO:0110095]; fructosamine catabolic process [GO:0030392]	-	-	-	-	-	-	-	-	-	-	-	-	-3.99696	-	-	1.48729e-17	-	-	DEG
ALDH1B1	A0A0D9S9K6	Aldehyde dehydrogenase 1 family member B1	cytosol [GO:0005829]; mitochondrial matrix [GO:0005759]; nucleoplasm [GO:0005654]; oxidoreductase activity, acting on the aldehyde or oxo group of donors, NAD or NADP as acceptor [GO:0016620]	-	-	-	-	-	-	-	-	-	-	-	-	-1.49881	-	-	0.00034606	-	-	DEG
ALDH2	A0A0D9S3S0	Aldehyde dehydrogenase 2 family member	mitochondrial matrix [GO:0005759]; aldehyde dehydrogenase (NAD+) activity [GO:0004029]; carboxylesterase activity [GO:0106435]; aldehyde catabolic process [GO:0046185]; nitroglycerin metabolic process [GO:0018937]; regulation of dopamine biosynthetic process [GO:1903179]; regulation of serotonin biosynthetic process [GO:1905627]	-	-	-	-	-	-	-	-	-	-	-	-	-2.08641	-	-	9.97791e-12	-	-	DEG
ALDH4A1	A0A0D9S8E6	Multifunctional fusion protein [Includes: Delta-1-pyrroline-5-carboxylate dehydrogenase (P5C dehydrogenase) (L-glutamate gamma-semialdehyde dehydrogenase); L-glutamate gamma-semialdehyde dehydrogenase (EC 1.2.1.88)]	cytosol [GO:0005829]; mitochondrial matrix [GO:0005759]; 1-pyrroline-5-carboxylate dehydrogenase activity [GO:0003842]; aldehyde dehydrogenase (NAD+) activity [GO:0004029]; identical protein binding [GO:0042802]; proline catabolic process to glutamate [GO:0010133]	-	-	-	-	-	-	-	-	-	-	-	-	-1.72735	-	-	0.00232542	-	-	DEG
ALDH7A1	A0A0D9RPV6	aldehyde dehydrogenase (NAD(+)) (EC 1.2.1.3)	cytosol [GO:0005829]; mitochondrion [GO:0005739]; betaine-aldehyde dehydrogenase (NAD+) activity [GO:0008802]; identical protein binding [GO:0042802]	-	-	-	-	-	-	-	-	-	-	-	-	-3.3989	-	-	2.40796e-12	-	-	DEG
ALDH9A1	-	-	-	-	-	-	-	-	-	-	-	-	-	-	-	-1.79134	-	-	1.33671e-05	-	-	DEG
ALDOA	A0A0D9R1H5	Fructose-bisphosphate aldolase (EC 4.1.2.13)	actin cytoskeleton [GO:0015629]; extracellular exosome [GO:0070062]; I band [GO:0031674]; M band [GO:0031430]; sperm head [GO:0061827]; cytoskeletal protein binding [GO:0008092]; fructose binding [GO:0070061]; fructose-bisphosphate aldolase activity [GO:0004332]; identical protein binding [GO:0042802]; ATP biosynthetic process [GO:0006754]; binding of sperm to zona pellucida [GO:0007339]; fructos…	-	-	-	-	-	-	-	-	-	-	-	-	-1.47801	-	-	0.0194847	-	-	DEG
ALG3	A0A0D9RMG2	Dol-P-Man:Man(5)GlcNAc(2)-PP-Dol alpha-1,3-mannosyltransferase (EC 2.4.1.258) (Dol-P-Man-dependent alpha(1-3)-mannosyltransferase)	endoplasmic reticulum membrane [GO:0005789]; dol-P-Man:Man(5)GlcNAc(2)-PP-Dol alpha-1,3-mannosyltransferase activity [GO:0052925]; dolichol-linked oligosaccharide biosynthetic process [GO:0006488]	Dol-P-Man:Man(5)GlcNAc(2)-PP-Dol alpha-1,3-mannosyltransferase that operates in the biosynthetic pathway of dolichol-linked oligosaccharides, the glycan precursors employed in protein asparagine (N)-glycosylation. The assembly of dolichol-linked oligosaccharides begins on the cytosolic side of the endoplasmic reticulum membrane and finishes in its lumen. The sequential addition of sugars to dolic…	-	-	-	-	-	-	-	-	-	-	-	-1.14233	-	-	0.0331011	-	-	DEG
ALKBH1	-	-	-	-	-	-	-	-	-	-	-	-	-	-	-	1.24863	-	-	0.0145063	-	-	DEG
ALKBH3	A0A0D9QZR0	AlkB homolog 3, alpha-ketoglutarate dependent dioxygenase	cytosol [GO:0005829]; mitochondrion [GO:0005739]; nucleoplasm [GO:0005654]; broad specificity oxidative DNA demethylase activity [GO:0035516]; ferrous iron binding [GO:0008198]; mRNA N1-methyladenosine dioxygenase activity [GO:1990930]; cell population proliferation [GO:0008283]; DNA alkylation repair [GO:0006307]; negative regulation of cytoplasmic translation [GO:2000766]	-	-	-	exon (XM_008001065.2, exon 8 of 10)	-	-1.40839	-	-	0.000184087	-	-	-	-	-	-	-	-	DMR	-
ALKBH4	A0A0D9RZR3	AlkB homolog 4, lysine demethylase	contractile ring [GO:0070938]; midbody [GO:0030496]; actin binding [GO:0003779]; broad specificity oxidative DNA demethylase activity [GO:0035516]; actomyosin structure organization [GO:0031032]; cleavage furrow ingression [GO:0036090]; demethylation [GO:0070988]; positive regulation of gene expression, epigenetic [GO:0141137]	-	-	-	exon (XM_008018425.2, exon 2 of 3)	-1.25707	-	-	6.69568e-08	-	-	-	-	-	-	-	-	DMR	-	-
ALKBH5	A0A0D9R750	RNA demethylase ALKBH5 (EC 1.14.11.53) (Alkylated DNA repair protein alkB homolog 5) (Alpha-ketoglutarate-dependent dioxygenase alkB homolog 5)	cytosol [GO:0005829]; Golgi apparatus [GO:0005794]; nuclear speck [GO:0016607]; paraspeckles [GO:0042382]; molecular condensate scaffold activity [GO:0140693]; mRNA N6-methyladenosine dioxygenase activity [GO:1990931]; gamma-delta T cell proliferation [GO:0046630]; mRNA destabilization [GO:0061157]; mRNA export from nucleus [GO:0006406]; mRNA processing [GO:0006397]; non-membrane-bounded organell…	-	m6A-eraser	-	exon (XM_008010545.2, exon 1 of 4)	-1.33751	-	-	6.11782e-11	-	-	-	-	-	-	-	-	DMR	-	-
ALKBH7	A0A0D9RBD9	AlkB homolog 7	mitochondrial matrix [GO:0005759]; DNA damage response [GO:0006974]; fatty acid metabolic process [GO:0006631]; regulation of lipid storage [GO:0010883]; regulation of mitochondrial membrane permeability involved in programmed necrotic cell death [GO:1902445]	-	-	-	-	-	-	-	-	-	-	-	-	-2.18677	-	-	0.000992787	-	-	DEG
ALMS1	A0A0D9RSH5	ALMS1 centrosome and basal body associated protein	centriole [GO:0005814]; centrosome [GO:0005813]; cytosol [GO:0005829]; microtubule binding [GO:0008017]; endosomal transport [GO:0016197]; regulation of centriole replication [GO:0046599]; regulation of stress fiber assembly [GO:0051492]	-	-	-	exon (XM_038007115.1, exon 8 of 25)	-	1.03935	-	-	0.0195682	-	-	-	-	-	-	-	-	DMR	-
ALOXE3	A0A0D9RED6	Arachidonate lipoxygenase 3	cytoplasm [GO:0005737]; membrane [GO:0016020]; hepoxilin A3 synthase activity [GO:0051120]; intramolecular hydroxytransferase activity [GO:0050486]; iron ion binding [GO:0005506]; oxidoreductase activity, acting on single donors with incorporation of molecular oxygen, incorporation of two atoms of oxygen [GO:0016702]; arachidonate metabolic process [GO:0019369]; ceramide biosynthetic process [GO:…	-	-	-	-	-	-	-	-	-	-	-	-	2.88238	-	-	0.000168022	-	-	DEG
ALPK1	A0A0D9QV10	Alpha kinase 1	centrosome [GO:0005813]; cilium [GO:0005929]; cytosol [GO:0005829]; spindle pole [GO:0000922]; ATP binding [GO:0005524]; monosaccharide binding [GO:0048029]; protein serine/threonine kinase activity [GO:0004674]; cilium assembly [GO:0060271]; cytoplasmic pattern recognition receptor signaling pathway [GO:0002753]; innate immune response [GO:0045087]; positive regulation of canonical NF-kappaB sig…	-	-	GO:0002764~immune response-regulating signaling pathway;GO:0006955~immune response;GO:0050776~regulation of immune response;GO:0002376~immune system process;GO:0002682~regulation of immune system process;GO:0045087~innate immune response	exon (XM_007999558.2, exon 11 of 15)	-3.60943	-	-	0.00375182	-	-	-	-	-	-	-	-	DMR	-	-
ALPK3	A0A0D9RXE4	non-specific serine/threonine protein kinase (EC 2.7.11.1)	nucleus [GO:0005634]; ATP binding [GO:0005524]; protein serine/threonine kinase activity [GO:0004674]; cardiac muscle cell development [GO:0055013]	-	-	-	-	-	-	-	-	-	-	-	-	2.4618	-	-	0.000822356	-	-	DEG
ALX1	A0A0D9QV21	ALX homeobox protein 1 (Cartilage homeoprotein 1)	Golgi apparatus [GO:0005794]; nuclear body [GO:0016604]; DNA-binding transcription activator activity, RNA polymerase II-specific [GO:0001228]; RNA polymerase II transcription regulatory region sequence-specific DNA binding [GO:0000977]; embryonic skeletal system morphogenesis [GO:0048704]; negative regulation of transcription by RNA polymerase II [GO:0000122]; positive regulation of epithelial t…	-	-	-	-	-	-	-	-	-	-	-	-	2.14009	-	-	0.00371383	-	-	DEG
AMACR	A0A0D9RX43	Alpha-methylacyl-CoA racemase	mitochondrion [GO:0005739]; peroxisome [GO:0005777]; plasma membrane [GO:0005886]; alpha-methylacyl-CoA racemase activity [GO:0008111]; bile acid metabolic process [GO:0008206]	-	-	-	-	-	-	-	-	-	-	-	-	-1.79817	-	-	0.0075864	-	-	DEG
AMFR	A0A0D9QYM5	Autocrine motility factor receptor	cytosol [GO:0005829]; Derlin-1 retrotranslocation complex [GO:0036513]; Golgi apparatus [GO:0005794]; perinuclear region of cytoplasm [GO:0048471]; ubiquitin ligase complex [GO:0000151]; BAT3 complex binding [GO:1904288]; identical protein binding [GO:0042802]; metal ion binding [GO:0046872]; protein-folding chaperone binding [GO:0051087]; protein-macromolecule adaptor activity [GO:0030674]; sign…	-	-	-	-	-	-	-	-	-	-	-	-	-1.11511	-	-	0.00134574	-	-	DEG
AMH	A0A0D9RH05	Muellerian-inhibiting factor	extracellular space [GO:0005615]; growth factor activity [GO:0008083]; type II transforming growth factor beta receptor binding [GO:0005114]; anti-Mullerian hormone receptor signaling pathway [GO:1990262]; cell differentiation [GO:0030154]; gonadal mesoderm development [GO:0007506]; Mullerian duct regression [GO:0001880]; positive regulation of gene expression [GO:0010628]; positive regulation of…	Plays an important role in several reproductive functions. Induces Muellerian duct regression during male fetal sexual differentiation and plays a role in Leydig cell differentiation and function. In female acts as a negative regulator of the primordial to primary follicle transition and decreases FSH sensitivity of growing follicles. AMH signals by binding to a specific type-II receptor, AMHR2, …	-	-	-	-	-	-	-	-	-	-	-	3.70869	-	-	0.000208815	-	-	DEG
AMHR2	A0A0D9QZL4	Anti-Muellerian hormone type-2 receptor (EC 2.7.11.30) (Anti-Muellerian hormone type II receptor) (MIS type II receptor)	plasma membrane [GO:0005886]; receptor complex [GO:0043235]; activin receptor activity, type I [GO:0016361]; activin receptor activity, type II [GO:0016362]; anti-Mullerian hormone receptor activity [GO:1990272]; ATP binding [GO:0005524]; BMP receptor activity [GO:0098821]; hormone binding [GO:0042562]; metal ion binding [GO:0046872]; protein homodimerization activity [GO:0042803]; transforming g…	On ligand binding, forms a receptor complex consisting of two type II and two type I transmembrane serine/threonine kinases. Type II receptors phosphorylate and activate type I receptors which autophosphorylate, then bind and activate SMAD transcriptional regulators. Receptor for anti-Muellerian hormone. {ECO:0000256|PIRNR:PIRNR037392}.	-	-	-	-	-	-	-	-	-	-	-	3.10678	-	-	0.000364678	-	-	DEG
AMIGO2	A0A0D9SD18	Adhesion molecule with Ig like domain 2	plasma membrane [GO:0005886]; brain development [GO:0007420]; cell adhesion [GO:0007155]; positive regulation of synapse assembly [GO:0051965]	-	-	-	-	-	-	-	-	-	-	-	-	-1.47841	-	-	0.0214944	-	-	DEG
AMMECR1L	A0A0D9RWC6	AMMECR1 like	nucleus [GO:0005634]	-	-	-	exon (XM_007964587.2, exon 3 of 9)	-1.13402	-	-	0.0130851	-	-	-	-	-	-	-	-	DMR	-	-
AMOT	A0A0D9R8H9	Angiomotin	actin filament [GO:0005884]; bicellular tight junction [GO:0005923]; COP9 signalosome [GO:0008180]; endocytic vesicle [GO:0030139]; external side of plasma membrane [GO:0009897]; lamellipodium [GO:0030027]; nucleoplasm [GO:0005654]; ruffle [GO:0001726]; angiostatin binding [GO:0043532]; signaling receptor activity [GO:0038023]; actin cytoskeleton organization [GO:0030036]; angiogenesis [GO:000152…	-	-	-	-	-	-	-	-	-	-	-	-	-2.0564	-	-	0.000256189	-	-	DEG
AMOTL2	A0A0D9REJ6	Angiomotin-like protein 2	bicellular tight junction [GO:0005923]; cell projection [GO:0042995]; plasma membrane [GO:0005886]; podosome [GO:0002102]; recycling endosome [GO:0055037]; actin cytoskeleton organization [GO:0030036]; angiogenesis [GO:0001525]; establishment of cell polarity involved in ameboidal cell migration [GO:0003365]; hippo signaling [GO:0035329]; positive regulation of protein localization [GO:1903829]; …	-	-	-	exon (XM_008009068.2, exon 2 of 10)	-	-1.10135	-	-	2.2558e-21	-	-	-	-	-	-	-	-	DMR	-
AMZ1	A0A0D9RYG0	Archaelysin family metallopeptidase 1	metallopeptidase activity [GO:0008237]	-	-	-	-	-	-	-	-	-	-	-	-	1.69207	-	-	0.0318922	-	-	DEG
ANAPC11	A0A0D9S4N1	Anaphase-promoting complex subunit 11	anaphase-promoting complex [GO:0005680]; nucleolus [GO:0005730]; nucleoplasm [GO:0005654]; cullin family protein binding [GO:0097602]; ubiquitin-ubiquitin ligase activity [GO:0034450]; zinc ion binding [GO:0008270]; anaphase-promoting complex-dependent catabolic process [GO:0031145]; cell division [GO:0051301]; positive regulation of mitotic metaphase/anaphase transition [GO:0045842]; protein bra…	-	-	-	-	-	-	-	-	-	-	-	-	-2.02136	-	-	0.00212806	-	-	DEG
ANAPC15	A0A0D9QW01	Anaphase promoting complex subunit 15	anaphase-promoting complex [GO:0005680]; anaphase-promoting complex-dependent catabolic process [GO:0031145]; cell division [GO:0051301]; protein branched polyubiquitination [GO:0141198]; protein K11-linked ubiquitination [GO:0070979]; protein K48-linked ubiquitination [GO:0070936]; regulation of mitotic cell cycle spindle assembly checkpoint [GO:0090266]	-	-	-	-	-	-	-	-	-	-	-	-	-1.62357	-	-	0.0264173	-	-	DEG
ANGPT1	A0A0D9RH22	Angiopoietin 1	extracellular space [GO:0005615]; membrane raft [GO:0045121]; microvillus [GO:0005902]; plasma membrane [GO:0005886]; identical protein binding [GO:0042802]; receptor ligand activity [GO:0048018]; receptor tyrosine kinase binding [GO:0030971]; blood coagulation [GO:0007596]; cell-substrate adhesion [GO:0031589]; glomerulus vasculature development [GO:0072012]; hemopoiesis [GO:0030097]; heparin bi…	-	-	-	exon (XM_008001347.2, exon 2 of 9)	1.2093	-	-	0.0196166	-	-	-	-	-	-	-	-	DMR	-	-
ANGPTL2	A0A0D9RMK9	Angiopoietin like 2	blood coagulation [GO:0007596]	-	-	-	exon (XM_008006182.2, exon 1 of 5)	2.56019	-	-	1.40434e-05	-	-	-	-	-	-	-	-	DMR	-	-
ANKDD1B	-	-	-	-	-	-	-	-	-	-	-	-	-	-	-	2.50831	-	-	6.23236e-05	-	-	DEG
ANKEF1	A0A0D9RME7	Ankyrin repeat and EF-hand domain containing 1	calcium ion binding [GO:0005509]	-	-	-	-	-	-	-	-	-	-	-	-	1.24995	-	-	0.00815818	-	-	DEG
ANKH	A0A0D9RXG3	ANKH inorganic pyrophosphate transport regulator	extracellular region [GO:0005576]; plasma membrane [GO:0005886]; ATP transmembrane transporter activity [GO:0005347]; inorganic diphosphate transmembrane transporter activity [GO:0030504]; phosphate transmembrane transporter activity [GO:0005315]; ATP export [GO:1904669]; bone mineralization [GO:0030282]; calcium ion homeostasis [GO:0055074]; cementum mineralization [GO:0071529]; diphosphate meta…	-	-	-	exon (XM_007961244.2, exon 11 of 12)	-1.02078	-	-	3.7166e-09	-	-	-	-	-	-	-	-	DMR	-	-
ANKMY2	A0A0D9RLZ0	Ankyrin repeat and MYND domain containing 2	cilium [GO:0005929]; enzyme binding [GO:0019899]; metal ion binding [GO:0046872]	-	-	-	exon (XM_007981979.2, exon 10 of 10)	1.17645	-	-	0.00123407	-	-	-	-	-	-	-	-	DMR	-	-
ANKRD11	A0A0D9S2V2	Ankyrin repeat domain containing 11	cytosol [GO:0005829]; nucleoplasm [GO:0005654]; face morphogenesis [GO:0060325]; odontogenesis of dentin-containing tooth [GO:0042475]; skeletal system morphogenesis [GO:0048705]	-	-	-	exon (XM_007994393.2, exon 5 of 13)	-1.24912	-	-	1.48138e-17	-	-	-	-	1.30119	-	-	0.000321395	DMR	-	DEG
ANKRD11	A0A0D9S2V2	Ankyrin repeat domain containing 11	cytosol [GO:0005829]; nucleoplasm [GO:0005654]; face morphogenesis [GO:0060325]; odontogenesis of dentin-containing tooth [GO:0042475]; skeletal system morphogenesis [GO:0048705]	-	-	-	promoter-TSS (XM_038008125.1)	-	4.38517	-	-	4.6265e-08	-	-	-	1.30119	-	-	0.000321395	-	DMR	DEG
ANKRD12	A0A0D9RYA1	Ankyrin repeat domain 12	cytosol [GO:0005829]; nucleoplasm [GO:0005654]	-	-	-	-	-	-	-	-	-	-	-	-	1.28272	-	-	4.42029e-05	-	-	DEG
ANKRD24	A0A0D9RE76	Ankyrin repeat domain 24	actin binding [GO:0003779]	-	-	-	-	-	-	-	-	-	-	-	-	2.07463	-	-	0.0134233	-	-	DEG
ANKRD26	A0A0D9RHS0	Ankyrin repeat domain containing 26	centrosome [GO:0005813]	-	-	-	-	-	-	-	-	-	-	-	-	1.15301	-	-	0.00702613	-	-	DEG
ANKRD27	A0A0D9QXP6	Ankyrin repeat domain 27	cytosol [GO:0005829]; early endosome [GO:0005769]; late endosome [GO:0005770]; lysosome [GO:0005764]; melanosome [GO:0042470]; neuron projection [GO:0043005]; plasma membrane [GO:0005886]; transport vesicle [GO:0030133]; tubular endosome [GO:0097422]; guanyl-nucleotide exchange factor activity [GO:0005085]; small GTPase binding [GO:0031267]; SNARE binding [GO:0000149]; early endosome to late endo…	-	-	-	exon (XM_007996209.2, exon 29 of 29)	-1.19086	1.72734	-	0.00418174	1.25717e-05	-	-	-	-	-	-	-	DMR	DMR	-
ANKRD33B	A0A0D9RXK5	Ankyrin repeat domain 33B	0	-	-	-	exon (XM_007961215.2, exon 4 of 4)	-1.71781	-	-	1.5203e-35	-	-	-	-	-	-	-	-	DMR	-	-
ANKRD42	A0A0D9QUM8	Ankyrin repeat domain 42	nucleus [GO:0005634]; NF-kappaB binding [GO:0051059]; positive regulation of cytokine production involved in inflammatory response [GO:1900017]	-	-	-	-	-	-	-	-	-	-	-	-	2.69639	-	-	1.57792e-10	-	-	DEG
ANKRD46	A0A0D9RI30	Ankyrin repeat domain 46	membrane [GO:0016020]	-	-	-	exon (XM_008001223.2, exon 5 of 5)	-	1.23523	-	-	1.19218e-06	-	-	-	-	-	-	-	-	DMR	-
ANKRD49	A0A0D9S1D4	Ankyrin repeat domain 49	cytoplasm [GO:0005737]; positive regulation of DNA-templated transcription [GO:0045893]	-	-	-	-	-	-	-	-	-	-	-	-	1.23823	-	-	0.0313063	-	-	DEG
ANKS6	A0A0D9RF71	Ankyrin repeat and sterile alpha motif domain containing 6	ciliary inversin compartment [GO:0097543]; cytoplasm [GO:0005737]; determination of left/right symmetry [GO:0007368]; heart development [GO:0007507]; in utero embryonic development [GO:0001701]; innate immune response [GO:0045087]; kidney development [GO:0001822]	-	-	-	exon (XM_007968611.2, exon 1 of 16)	-	3.43428	-	-	3.74716e-15	-	-	-	-	-	-	-	-	DMR	-
ANKZF1	A0A0D9R736	Ankyrin repeat and zinc finger peptidyl tRNA hydrolase 1	cytoplasm [GO:0005737]; catalytic activity, acting on a tRNA [GO:0140101]; metal ion binding [GO:0046872]; RNA endonuclease activity [GO:0004521]; cellular response to hydrogen peroxide [GO:0070301]; ERAD pathway [GO:0036503]; protein quality control for misfolded or incompletely synthesized proteins [GO:0006515]; rescue of stalled ribosome [GO:0072344]	-	-	-	exon (XM_007966355.2, exon 10 of 14)	-1.07727	-	-	1.0972e-08	-	-	-	-	-	-	-	-	DMR	-	-
ANKZF1	A0A0D9R736	Ankyrin repeat and zinc finger peptidyl tRNA hydrolase 1	cytoplasm [GO:0005737]; catalytic activity, acting on a tRNA [GO:0140101]; metal ion binding [GO:0046872]; RNA endonuclease activity [GO:0004521]; cellular response to hydrogen peroxide [GO:0070301]; ERAD pathway [GO:0036503]; protein quality control for misfolded or incompletely synthesized proteins [GO:0006515]; rescue of stalled ribosome [GO:0072344]	-	-	-	exon (XM_007966355.2, exon 11 of 14)	-1.12849	-	-	1.88257e-09	-	-	-	-	-	-	-	-	DMR	-	-
ANO3	A0A0D9QYS3	Anoctamin	plasma membrane [GO:0005886]; chloride channel activity [GO:0005254]; phospholipid scramblase activity [GO:0017128]; protein dimerization activity [GO:0046983]; calcium activated galactosylceramide scrambling [GO:0061591]; calcium activated phosphatidylcholine scrambling [GO:0061590]; establishment of localization in cell [GO:0051649]	-	-	-	intron (XM_008003923.2, intron 4 of 26)	-	1.07199	-	-	0.00439197	-	-	-	-	-	-	-	-	DMR	-
ANP32A	-	-	-	-	-	-	-	-	-	-	-	-	-	-	-	-1.45935	-	-	0.000159246	-	-	DEG
ANP32E	A0A0D9RZT2	Acidic leucine-rich nuclear phosphoprotein 32 family member	glutamatergic synapse [GO:0098978]; postsynaptic density membrane [GO:0098839]; postsynaptic endosome membrane [GO:0098895]; Swr1 complex [GO:0000812]; synaptic vesicle membrane [GO:0030672]; histone binding [GO:0042393]; histone chaperone activity [GO:0140713]; phosphatase inhibitor activity [GO:0019212]; chromatin organization [GO:0006325]; regulation of apoptotic process [GO:0042981]	Histone chaperone that specifically mediates the genome-wide removal of histone H2A.Z/H2AZ1 from the nucleosome: removes H2A.Z/H2AZ1 from its normal sites of deposition, especially from enhancer and insulator regions. Not involved in deposition of H2A.Z/H2AZ1 in the nucleosome. May stabilize the evicted H2A.Z/H2AZ1-H2B dimer, thus shifting the equilibrium towards dissociation and the off-chromati…	-	-	-	-	-	-	-	-	-	-	-	-1.43647	-	-	1.75664e-05	-	-	DEG
ANTKMT	-	-	-	-	-	-	-	-	-	-	-	-	-	-	-	-2.19375	-	-	0.00147233	-	-	DEG
ANTXR1	A0A0D9RR35	ANTXR cell adhesion molecule 1	external side of plasma membrane [GO:0009897]; filopodium membrane [GO:0031527]; lamellipodium membrane [GO:0031258]; actin filament binding [GO:0051015]; collagen binding [GO:0005518]; transmembrane signaling receptor activity [GO:0004888]; actin cytoskeleton organization [GO:0030036]; blood vessel development [GO:0001568]; negative regulation of extracellular matrix assembly [GO:1901202]; subst…	-	-	-	-	-	-	-	-	-	-	-	-	-1.86447	-	-	0.00181102	-	-	DEG
ANXA11	A0A0D9RAJ5	Annexin	azurophil granule [GO:0042582]; cytosol [GO:0005829]; midbody [GO:0030496]; nuclear envelope [GO:0005635]; nucleoplasm [GO:0005654]; phagocytic vesicle [GO:0045335]; plasma membrane [GO:0005886]; specific granule [GO:0042581]; spindle [GO:0005819]; vesicle membrane [GO:0012506]; calcium ion binding [GO:0005509]; calcium-dependent phospholipid binding [GO:0005544]; calcium-dependent protein bindin…	-	-	-	-	-	-	-	-	-	-	-	-	-2.10721	-	-	0.000759543	-	-	DEG
ANXA2	-	-	-	-	-	-	exon (XM_008016395.2, exon 8 of 13)	-	-1.09049	-	-	4.04289e-292	-	-	-	-2.03482	-	-	0.0192241	-	DMR	DEG
ANXA2	-	-	-	-	-	-	exon (XM_008016395.2, exon 12 of 13)	-	-1.01061	-	-	1.8932e-83	-	-	-	-2.03482	-	-	0.0192241	-	DMR	DEG
ANXA4	A0A0D9RRC2	Annexin	cell surface [GO:0009986]; nuclear membrane [GO:0031965]; perinuclear region of cytoplasm [GO:0048471]; plasma membrane [GO:0005886]; zymogen granule membrane [GO:0042589]; calcium ion binding [GO:0005509]; calcium-dependent phospholipid binding [GO:0005544]; calcium-dependent protein binding [GO:0048306]; identical protein binding [GO:0042802]; NF-kappaB binding [GO:0051059]; phosphatidylserine …	-	-	-	-	-	-	-	-	-	-	-	-	-2.91601	-	-	2.50083e-06	-	-	DEG
ANXA5	A0A0D9QUP4	Annexin	cytoplasm [GO:0005737]; nucleus [GO:0005634]; plasma membrane [GO:0005886]; vesicle membrane [GO:0012506]; calcium ion binding [GO:0005509]; calcium-dependent phospholipid binding [GO:0005544]; phosphatidylserine binding [GO:0001786]; negative regulation of coagulation [GO:0050819]	This protein is an anticoagulant protein that acts as an indirect inhibitor of the thromboplastin-specific complex, which is involved in the blood coagulation cascade. {ECO:0000256|ARBA:ARBA00002758}.	-	-	-	-	-	-	-	-	-	-	-	-1.58744	-	-	0.0220223	-	-	DEG
ANXA6	A0A0D9RF24	Annexin	late endosome membrane [GO:0031902]; lysosomal membrane [GO:0005765]; melanosome [GO:0042470]; mitochondrion [GO:0005739]; nucleus [GO:0005634]; plasma membrane [GO:0005886]; calcium ion binding [GO:0005509]; calcium-dependent phospholipid binding [GO:0005544]; calcium-dependent protein binding [GO:0048306]; cholesterol binding [GO:0015485]; GTP binding [GO:0005525]; identical protein binding [GO…	May associate with CD21. May regulate the release of Ca(2+) from intracellular stores. {ECO:0000256|ARBA:ARBA00025332}.	-	-	-	-	-	-	-	-	-	-	-	-1.22927	-	-	0.011991	-	-	DEG
AOC2	A0A0D9S1F7	Amine oxidase (EC 1.4.3.-)	plasma membrane [GO:0005886]; copper ion binding [GO:0005507]; primary methylamine oxidase activity [GO:0008131]; quinone binding [GO:0048038]; amine metabolic process [GO:0009308]	-	-	-	-	-	-	-	-	-	-	-	-	3.46127	-	-	9.11405e-07	-	-	DEG
AOC3	A0A0D9S1F2	Amine oxidase (EC 1.4.3.-)	cell surface [GO:0009986]; early endosome [GO:0005769]; endoplasmic reticulum [GO:0005783]; Golgi apparatus [GO:0005794]; microvillus [GO:0005902]; plasma membrane [GO:0005886]; calcium ion binding [GO:0005509]; copper ion binding [GO:0005507]; identical protein binding [GO:0042802]; primary methylamine oxidase activity [GO:0008131]; protein heterodimerization activity [GO:0046982]; quinone bindi…	-	-	-	-	-	-	-	-	-	-	-	-	3.71891	-	-	0.00930134	-	-	DEG
AP1G1	A0A0D9QW83	AP-1 complex subunit gamma	AP-1 adaptor complex [GO:0030121]; cytosol [GO:0005829]; recycling endosome [GO:0055037]; GTP-dependent protein binding [GO:0030742]; kinesin binding [GO:0019894]; small GTPase binding [GO:0031267]; endosome to melanosome transport [GO:0035646]; Golgi to lysosome transport [GO:0090160]; intracellular protein transport [GO:0006886]; positive regulation of natural killer cell degranulation [GO:0043…	-	-	GO:0002443~leukocyte mediated immunity;GO:0002449~lymphocyte mediated immunity;GO:0006955~immune response;GO:0050776~regulation of immune response;GO:0002252~immune effector process;GO:0045087~innate immune response;GO:0050778~positive regulation of immune response;GO:0002697~regulation of immune effector process;GO:0002684~positive regulation of immune system process;GO:0050778~positive regulati…	exon (XM_007993748.2, exon 24 of 24)	-	1.08332	-	-	0.0107321	-	-	-	-	-	-	-	-	DMR	-
AP1G1	A0A0D9QW83	AP-1 complex subunit gamma	AP-1 adaptor complex [GO:0030121]; cytosol [GO:0005829]; recycling endosome [GO:0055037]; GTP-dependent protein binding [GO:0030742]; kinesin binding [GO:0019894]; small GTPase binding [GO:0031267]; endosome to melanosome transport [GO:0035646]; Golgi to lysosome transport [GO:0090160]; intracellular protein transport [GO:0006886]; positive regulation of natural killer cell degranulation [GO:0043…	-	-	GO:0002443~leukocyte mediated immunity;GO:0002449~lymphocyte mediated immunity;GO:0006955~immune response;GO:0050776~regulation of immune response;GO:0002252~immune effector process;GO:0045087~innate immune response;GO:0050778~positive regulation of immune response;GO:0002697~regulation of immune effector process;GO:0002684~positive regulation of immune system process;GO:0050778~positive regulati…	exon (XM_007993748.2, exon 10 of 24)	1.01209	-	-	0.00109141	-	-	-	-	-	-	-	-	DMR	-	-
AP1M2	A0A0D9R425	AP-1 complex subunit mu-2	clathrin adaptor complex [GO:0030131]; clathrin-coated vesicle membrane [GO:0030665]; cytosol [GO:0005829]; Golgi apparatus [GO:0005794]; intracellular protein transport [GO:0006886]; vesicle-mediated transport [GO:0016192]	Subunit of clathrin-associated adaptor protein complex 1 that plays a role in protein sorting in the trans-Golgi network (TGN) and endosomes. The AP complexes mediate the recruitment of clathrin to membranes and the recognition of sorting signals within the cytosolic tails of transmembrane cargo molecules. {ECO:0000256|PIRNR:PIRNR005992}.	-	-	-	-	-	-	-	-	-	-	-	-2.15603	-	-	0.00179759	-	-	DEG
AP1S1	A0A0D9RZJ4	AP complex subunit sigma	AP-1 adaptor complex [GO:0030121]; clathrin-coated pit [GO:0005905]; clathrin adaptor activity [GO:0035615]; intracellular protein transport [GO:0006886]; response to virus [GO:0009615]	-	-	-	-	-	-	-	-	-	-	-	-	-2.91275	-	-	8.51091e-07	-	-	DEG
AP1S2	A0A0D9RQS9	Adaptor related protein complex 1 subunit sigma 2	AP-1 adaptor complex [GO:0030121]; clathrin-coated pit [GO:0005905]; clathrin adaptor activity [GO:0035615]; intracellular protein transport [GO:0006886]	-	-	-	exon (XM_007991119.2, exon 2 of 6)	1.63244	-	-	1.21757e-33	-	-	-	-	-	-	-	-	DMR	-	-
AP1S3	A0A0D9R5Y1	AP complex subunit sigma	AP-1 adaptor complex [GO:0030121]; clathrin-coated pit [GO:0005905]; clathrin adaptor activity [GO:0035615]; intracellular protein transport [GO:0006886]; protein targeting [GO:0006605]	-	-	-	-	-	-	-	-	-	-	-	-	1.44173	-	-	0.0366562	-	-	DEG
AP2M1	A0A0D9RM84	AP-2 complex subunit mu (AP-2 mu chain) (Clathrin assembly protein complex 2 mu medium chain) (Clathrin coat assembly protein AP50) (Clathrin coat-associated protein AP50) (Plasma membrane adaptor AP-2 50 kDa protein)	AP-2 adaptor complex [GO:0030122]; glutamatergic synapse [GO:0098978]; postsynapse [GO:0098794]; presynapse [GO:0098793]; disordered domain specific binding [GO:0097718]; signal sequence binding [GO:0005048]; transmembrane transporter binding [GO:0044325]; clathrin-dependent endocytosis [GO:0072583]; intracellular protein transport [GO:0006886]; negative regulation of protein localization to plas…	-	-	-	-	-	-	-	-	-	-	-	-	-1.65713	-	-	0.000123575	-	-	DEG
AP2S1	-	-	-	-	-	-	-	-	-	-	-	-	-	-	-	-2.14439	-	-	0.00340959	-	-	DEG
AP3S1	A0A0D9RQQ1	AP complex subunit sigma	AP-3 adaptor complex [GO:0030123]; axon cytoplasm [GO:1904115]; cytoplasmic vesicle membrane [GO:0030659]; Golgi apparatus [GO:0005794]; anterograde synaptic vesicle transport [GO:0048490]; Golgi to vacuole transport [GO:0006896]; intracellular protein transport [GO:0006886]	Part of the AP-3 complex, an adaptor-related complex which is not clathrin-associated. The complex is associated with the Golgi region as well as more peripheral structures. It facilitates the budding of vesicles from the Golgi membrane and may be directly involved in trafficking to lysosomes. In concert with the BLOC-1 complex, AP-3 is required to target cargos into vesicles assembled at cell bo…	-	-	-	-	-	-	-	-	-	-	-	-1.44997	-	-	0.00401618	-	-	DEG
AP4E1	A0A0D9RFG7	AP-4 complex subunit epsilon	AP-4 adaptor complex [GO:0030124]; Golgi apparatus [GO:0005794]; intracellular protein transport [GO:0006886]; vesicle-mediated transport [GO:0016192]	Component of the adaptor protein complex 4 (AP-4). Adaptor protein complexes are vesicle coat components involved both in vesicle formation and cargo selection. They control the vesicular transport of proteins in different trafficking pathways. AP-4 forms a non clathrin-associated coat on vesicles departing the trans-Golgi network (TGN) and may be involved in the targeting of proteins from the tr…	-	-	-	-	-	-	-	-	-	-	-	1.01627	-	-	0.000246749	-	-	DEG
AP4M1	A0A0D9RZ30	AP-4 complex subunit mu-1	AP-4 adaptor complex [GO:0030124]; clathrin adaptor complex [GO:0030131]; cytosol [GO:0005829]; early endosome [GO:0005769]; trans-Golgi network [GO:0005802]; protein domain specific binding [GO:0019904]; autophagosome assembly [GO:0000045]; Golgi to endosome transport [GO:0006895]; Golgi to lysosome transport [GO:0090160]; protein targeting to lysosome [GO:0006622]	Component of the adaptor protein complex 4 (AP-4). Adaptor protein complexes are vesicle coat components involved both in vesicle formation and cargo selection. They control the vesicular transport of proteins in different trafficking pathways. AP-4 forms a non clathrin-associated coat on vesicles departing the trans-Golgi network (TGN) and may be involved in the targeting of proteins from the tr…	-	-	TTS (XM_008018589.2)	-1.10124	-	-	0.00896345	-	-	-	-	-	-	-	-	DMR	-	-
AP4S1	-	-	-	-	-	-	exon (XM_038002247.1, exon 1 of 1)	1.33268	-	-	0.00830158	-	-	-	-	-	-	-	-	DMR	-	-
APC	A0A0D9RR03	APC regulator of WNT signaling pathway	adherens junction [GO:0005912]; beta-catenin destruction complex [GO:0030877]; bicellular tight junction [GO:0005923]; catenin complex [GO:0016342]; centrosome [GO:0005813]; cytoplasmic microtubule [GO:0005881]; Golgi apparatus [GO:0005794]; kinetochore [GO:0000776]; lamellipodium [GO:0030027]; lateral plasma membrane [GO:0016328]; nucleus [GO:0005634]; perinuclear region of cytoplasm [GO:0048471…	-	-	-	exon (XM_008014135.2, exon 11 of 16)	1.61951	-	-	2.07094e-05	-	-	-	-	-	-	-	-	DMR	-	-
APC	A0A0D9RR03	APC regulator of WNT signaling pathway	adherens junction [GO:0005912]; beta-catenin destruction complex [GO:0030877]; bicellular tight junction [GO:0005923]; catenin complex [GO:0016342]; centrosome [GO:0005813]; cytoplasmic microtubule [GO:0005881]; Golgi apparatus [GO:0005794]; kinetochore [GO:0000776]; lamellipodium [GO:0030027]; lateral plasma membrane [GO:0016328]; nucleus [GO:0005634]; perinuclear region of cytoplasm [GO:0048471…	-	-	-	exon (XM_008014135.2, exon 13 of 16)	1.20259	-	-	6.7533e-10	-	-	-	-	-	-	-	-	DMR	-	-
APC	A0A0D9RR03	APC regulator of WNT signaling pathway	adherens junction [GO:0005912]; beta-catenin destruction complex [GO:0030877]; bicellular tight junction [GO:0005923]; catenin complex [GO:0016342]; centrosome [GO:0005813]; cytoplasmic microtubule [GO:0005881]; Golgi apparatus [GO:0005794]; kinetochore [GO:0000776]; lamellipodium [GO:0030027]; lateral plasma membrane [GO:0016328]; nucleus [GO:0005634]; perinuclear region of cytoplasm [GO:0048471…	-	-	-	exon (XM_008014139.2, exon 2 of 17)	1.33154	-	-	1.19295e-08	-	-	-	-	-	-	-	-	DMR	-	-
APC	A0A0D9RR03	APC regulator of WNT signaling pathway	adherens junction [GO:0005912]; beta-catenin destruction complex [GO:0030877]; bicellular tight junction [GO:0005923]; catenin complex [GO:0016342]; centrosome [GO:0005813]; cytoplasmic microtubule [GO:0005881]; Golgi apparatus [GO:0005794]; kinetochore [GO:0000776]; lamellipodium [GO:0030027]; lateral plasma membrane [GO:0016328]; nucleus [GO:0005634]; perinuclear region of cytoplasm [GO:0048471…	-	-	-	promoter-TSS (XM_008014141.2)	1.13245	-	-	0.00468789	-	-	-	-	-	-	-	-	DMR	-	-
APEH	A0A0D9RR27	Acylamino-acid-releasing enzyme (EC 3.4.19.1) (Acyl-peptide hydrolase) (Acylaminoacyl-peptidase)	cytosol [GO:0005829]; nuclear membrane [GO:0031965]; identical protein binding [GO:0042802]; omega peptidase activity [GO:0008242]; serine-type endopeptidase activity [GO:0004252]; amyloid-beta metabolic process [GO:0050435]; proteolysis [GO:0006508]	This enzyme catalyzes the hydrolysis of the N-terminal peptide bond of an N-acetylated peptide to generate an N-acetylated amino acid and a peptide with a free N-terminus. It preferentially cleaves off Ac-Ala, Ac-Met and Ac-Ser. Also, involved in the degradation of oxidized and glycated proteins. {ECO:0000256|ARBA:ARBA00045885}.	-	-	-	-	-	-	-	-	-	-	-	-1.1032	-	-	0.00148206	-	-	DEG
APH1A	A0A0D9RZT0	Gamma-secretase subunit APH-1 (APH-1)	endoplasmic reticulum [GO:0005783]; gamma-secretase complex [GO:0070765]; Golgi apparatus [GO:0005794]; endopeptidase activator activity [GO:0061133]; enzyme binding [GO:0019899]; protein-macromolecule adaptor activity [GO:0030674]; amyloid-beta formation [GO:0034205]; membrane protein ectodomain proteolysis [GO:0006509]; membrane protein intracellular domain proteolysis [GO:0031293]; metanephros…	Potential subunit of the gamma-secretase complex, an endoprotease complex that catalyzes the intramembrane cleavage of integral proteins such as Notch receptors. {ECO:0000256|RuleBase:RU369072}.	-	-	-	-	-	-	-	-	-	-	-	-1.1653	-	-	0.000945503	-	-	DEG
APLP2	A0A0D9S4Q6	Amyloid beta precursor like protein 2	endomembrane system [GO:0012505]; nucleus [GO:0005634]; plasma membrane [GO:0005886]; heparin binding [GO:0008201]; identical protein binding [GO:0042802]; serine-type endopeptidase inhibitor activity [GO:0004867]; transition metal ion binding [GO:0046914]; axonogenesis [GO:0007409]; central nervous system development [GO:0007417]	-	-	-	-	-	-	-	-	-	-	-	-	-2.75754	-	-	1.81701e-11	-	-	DEG
APOBEC3C	A0A0D9R255	Apolipoprotein B mRNA editing enzyme catalytic subunit 3C	nucleus [GO:0005634]; P-body [GO:0000932]; cytidine deaminase activity [GO:0004126]; RNA binding [GO:0003723]; zinc ion binding [GO:0008270]; clearance of foreign intracellular DNA [GO:0044355]; cytidine deamination [GO:0009972]; cytidine to uridine editing [GO:0016554]; defense response to virus [GO:0051607]; DNA cytosine deamination [GO:0070383]; innate immune response [GO:0045087]; negative re…	-	-	-	-	-	-	-	-	-	-	-	-	-2.09029	-	-	0.000425714	-	-	DEG
APOBEC3G	A0A0D9R229	DNA dC->dU-editing enzyme APOBEC-3G (EC 3.5.4.-) (Deoxycytidine deaminase)	nucleus [GO:0005634]; P-body [GO:0000932]; ribonucleoprotein complex [GO:1990904]; cytidine deaminase activity [GO:0004126]; identical protein binding [GO:0042802]; RNA binding [GO:0003723]; zinc ion binding [GO:0008270]; cytidine deamination [GO:0009972]; cytidine to uridine editing [GO:0016554]; defense response to virus [GO:0051607]; DNA cytosine deamination [GO:0070383]; innate immune respons…	DNA deaminase (cytidine deaminase) which acts as an inhibitor of retrovirus replication and retrotransposon mobility. After the penetration of retroviral nucleocapsids into target cells of infection and the initiation of reverse transcription, it can induce the conversion of cytosine to uracil in the minus-sense single-strand viral DNA, leading to G-to-A hypermutations in the subsequent plus-stra…	-	GO:0002376~immune system process;GO:0006955~immune response;GO:0051607~defense response to virus;GO:0045087~innate immune response;GO:0009615~response to virus	-	-	-	-	-	-	-	-	-	-2.10235	-	-	0.00181102	-	-	DEG
APOE	A0A0D9S1R0	Apolipoprotein E (Apo-E)	chylomicron [GO:0042627]; extracellular exosome [GO:0070062]; extracellular matrix [GO:0031012]; extracellular space [GO:0005615]; high-density lipoprotein particle [GO:0034364]; intermediate-density lipoprotein particle [GO:0034363]; low-density lipoprotein particle [GO:0034362]; multivesicular body, internal vesicle [GO:0097487]; very-low-density lipoprotein particle [GO:0034361]; cholesterol t…	APOE is an apolipoprotein, a protein associating with lipid particles, that mainly functions in lipoprotein-mediated lipid transport between organs via the plasma and interstitial fluids. APOE is a core component of plasma lipoproteins and is involved in their production, conversion and clearance. Apolipoproteins are amphipathic molecules that interact both with lipids of the lipoprotein particle…	-	GO:0016032~viral process;GO:0002682~regulation of immune system process;GO:0002376~immune system process;GO:0019058~viral life cycle;GO:0006955~immune response;GO:0050776~regulation of immune response;GO:0045087~innate immune response;GO:0045088~regulation of innate immune response	exon (XM_007997156.2, exon 4 of 5)	-1.00638	-	-	1.36857e-173	-	-	-	-	-2.40634	-	-	6.83532e-05	DMR	-	DEG
APPBP2	A0A0D9R101	Amyloid beta precursor protein binding protein 2	Cul2-RING ubiquitin ligase complex [GO:0031462]; cytoplasmic vesicle membrane [GO:0030659]; nucleoplasm [GO:0005654]; ubiquitin-like ligase-substrate adaptor activity [GO:1990756]; intracellular protein transport [GO:0006886]; proteasome-mediated ubiquitin-dependent protein catabolic process [GO:0043161]	-	-	-	exon (XM_008011202.2, exon 13 of 13)	1.24546	1.12482	-	1.58795e-05	3.63462e-11	-	-	-	-	-	-	-	DMR	DMR	-
APPL1	A0A0D9RK09	Adaptor protein, phosphotyrosine interacting with PH domain and leucine zipper 1	cytosol [GO:0005829]; early endosome membrane [GO:0031901]; early phagosome [GO:0032009]; glutamatergic synapse [GO:0098978]; macropinosome [GO:0044354]; nucleus [GO:0005634]; plasma membrane [GO:0005886]; ruffle [GO:0001726]; beta-tubulin binding [GO:0048487]; phosphatidylinositol binding [GO:0035091]; phosphatidylserine binding [GO:0001786]; protein homodimerization activity [GO:0042803]; prote…	-	-	GO:0002683~negative regulation of immune system process;GO:0002682~regulation of immune system process;GO:0045088~regulation of innate immune response;GO:0002376~immune system process;GO:0002684~positive regulation of immune system process;GO:0002683~negative regulation of immune system process;GO:0002376~immune system process;GO:0002682~regulation of immune system process	exon (XM_007984691.2, exon 22 of 22)	1.34558	1.303	-	3.92798e-09	5.66796e-10	-	-	-	-	-	-	-	DMR	DMR	-
APPL2	A0A0D9S2I0	Adaptor protein, phosphotyrosine interacting with PH domain and leucine zipper 2	early endosome membrane [GO:0031901]; early phagosome membrane [GO:0036186]; macropinosome [GO:0044354]; nucleus [GO:0005634]; ruffle membrane [GO:0032587]; phosphatidylinositol binding [GO:0035091]; phosphatidylserine binding [GO:0001786]; protein homodimerization activity [GO:0042803]; protein-containing complex binding [GO:0044877]; adiponectin-activated signaling pathway [GO:0033211]; cellula…	-	-	-	-	-	-	-	-	-	-	-	-	-1.28599	-	-	0.00281171	-	-	DEG
APRT	A0A0D9S2Q6	Adenine phosphoribosyltransferase (EC 2.4.2.7)	cytosol [GO:0005829]; nucleoplasm [GO:0005654]; adenine binding [GO:0002055]; adenine phosphoribosyltransferase activity [GO:0003999]; AMP binding [GO:0016208]; adenine salvage [GO:0006168]; AMP salvage [GO:0044209]; GMP salvage [GO:0032263]; grooming behavior [GO:0007625]; IMP salvage [GO:0032264]; purine ribonucleoside salvage [GO:0006166]	Catalyzes a salvage reaction resulting in the formation of AMP, that is energically less costly than de novo synthesis. {ECO:0000256|ARBA:ARBA00003968}.	-	-	-	-	-	-	-	-	-	-	-	-1.36066	-	-	0.00714828	-	-	DEG
APTX	A0A0D9RBY7	Aprataxin (EC 3.6.1.71) (EC 3.6.1.72) (Forkhead-associated domain histidine triad-like protein)	chromatin [GO:0000785]; nucleolus [GO:0005730]; nucleoplasm [GO:0005654]; chromatin binding [GO:0003682]; DNA 5'-adenosine monophosphate hydrolase activity [GO:0033699]; DNA-3'-diphospho-5'-guanosine diphosphatase [GO:0120108]; double-stranded RNA binding [GO:0003725]; metal ion binding [GO:0046872]; mismatched DNA binding [GO:0030983]; phosphoglycolate phosphatase activity [GO:0008967]; phosphop…	DNA-binding protein involved in single-strand DNA break repair, double-strand DNA break repair and base excision repair. Resolves abortive DNA ligation intermediates formed either at base excision sites, or when DNA ligases attempt to repair non-ligatable breaks induced by reactive oxygen species. Catalyzes the release of adenylate groups covalently linked to 5'-phosphate termini, resulting in th…	-	-	exon (XM_007969009.2, exon 4 of 8)	-	-1.02992	-	-	0.0019019	-	-	-	-	-	-	-	-	DMR	-
AQR	A0A0D9R489	RNA helicase aquarius	nucleoplasm [GO:0005654]; U2-type catalytic step 2 spliceosome [GO:0071007]; 3'-5' RNA helicase activity [GO:0034458]; mRNA binding [GO:0003729]; single-stranded RNA binding [GO:0003727]; mRNA splicing, via spliceosome [GO:0000398]	Intron-binding spliceosomal protein required to link pre-mRNA splicing and snoRNP (small nucleolar ribonucleoprotein) biogenesis. Plays a key role in position-dependent assembly of intron-encoded box C/D small snoRNP, splicing being required for snoRNP assembly. May act by helping the folding of the snoRNA sequence. Binds to intron of pre-mRNAs in a sequence-independent manner, contacting the reg…	-	-	intron (XM_008017124.2, intron 7 of 34)	-	1.09152	-	-	1.70843e-05	-	-	-	-	-	-	-	-	DMR	-
ARAP2	A0A0D9RW49	ArfGAP with RhoGAP domain, ankyrin repeat and PH domain 2	cytoplasm [GO:0005737]; GTPase activator activity [GO:0005096]; phosphatidylinositol-3,4,5-trisphosphate binding [GO:0005547]; signal transduction [GO:0007165]	-	-	-	exon (XM_008017677.2, exon 33 of 33)	-	1.65182	-	-	0.0324877	-	-	-	1.25832	-	-	0.0180587	-	DMR	DEG
ARAP3	A0A0D9RJ36	ArfGAP with RhoGAP domain, ankyrin repeat and PH domain 3	cytoplasm [GO:0005737]; GTPase activator activity [GO:0005096]; phosphatidylinositol-3,4,5-trisphosphate binding [GO:0005547]; phosphatidylinositol-3,4-bisphosphate binding [GO:0043325]; signal transduction [GO:0007165]	-	-	-	-	-	-	-	-	-	-	-	-	1.30649	-	-	0.014387	-	-	DEG
ARCN1	A0A0D9S3N4	Coatomer subunit delta	COPI vesicle coat [GO:0030126]; endoplasmic reticulum [GO:0005783]; Golgi membrane [GO:0000139]; adult locomotory behavior [GO:0008344]; cerebellar Purkinje cell layer maturation [GO:0021691]; endoplasmic reticulum to Golgi vesicle-mediated transport [GO:0006888]; Golgi localization [GO:0051645]; pigmentation [GO:0043473]; protein transport [GO:0015031]; retrograde vesicle-mediated transport, Gol…	The coatomer is a cytosolic protein complex that binds to dilysine motifs and reversibly associates with Golgi non-clathrin-coated vesicles, which further mediate biosynthetic protein transport from the ER, via the Golgi up to the trans Golgi network. Coatomer complex is required for budding from Golgi membranes, and is essential for the retrograde Golgi-to-ER transport of dilysine-tagged protein…	-	-	exon (XM_008021077.2, exon 3 of 10)	1.07848	-	-	2.08446e-25	-	-	-	-	-	-	-	-	DMR	-	-
ARCN1	A0A0D9S3N4	Coatomer subunit delta	COPI vesicle coat [GO:0030126]; endoplasmic reticulum [GO:0005783]; Golgi membrane [GO:0000139]; adult locomotory behavior [GO:0008344]; cerebellar Purkinje cell layer maturation [GO:0021691]; endoplasmic reticulum to Golgi vesicle-mediated transport [GO:0006888]; Golgi localization [GO:0051645]; pigmentation [GO:0043473]; protein transport [GO:0015031]; retrograde vesicle-mediated transport, Gol…	The coatomer is a cytosolic protein complex that binds to dilysine motifs and reversibly associates with Golgi non-clathrin-coated vesicles, which further mediate biosynthetic protein transport from the ER, via the Golgi up to the trans Golgi network. Coatomer complex is required for budding from Golgi membranes, and is essential for the retrograde Golgi-to-ER transport of dilysine-tagged protein…	-	-	exon (XM_008021077.2, exon 5 of 10)	1.15471	-	-	9.75786e-22	-	-	-	-	-	-	-	-	DMR	-	-
ARF1	A0A0D9RV83	ADP-ribosylation factor	cell leading edge [GO:0031252]; cytosol [GO:0005829]; Golgi membrane [GO:0000139]; neuron projection [GO:0043005]; protein-containing complex [GO:0032991]; sarcomere [GO:0030017]; synapse [GO:0045202]; GTP binding [GO:0005525]; GTPase activity [GO:0003924]; magnesium ion binding [GO:0000287]; protein domain specific binding [GO:0019904]; cellular response to virus [GO:0098586]; intracellular copp…	GTP-binding protein involved in protein trafficking; modulates vesicle budding and uncoating within the Golgi apparatus. {ECO:0000256|RuleBase:RU369003}.	-	GO:0098586~cellular response to virus	-	-	-	-	-	-	-	-	-	-1.12697	-	-	0.0343311	-	-	DEG
ARF3	A0A0D9R1N4	ADP-ribosylation factor	Golgi apparatus [GO:0005794]; GTP binding [GO:0005525]; GTPase activity [GO:0003924]; protein transport [GO:0015031]; retrograde vesicle-mediated transport, Golgi to endoplasmic reticulum [GO:0006890]	GTP-binding protein involved in protein trafficking; modulates vesicle budding and uncoating within the Golgi apparatus. {ECO:0000256|RuleBase:RU369003}.	-	-	-	-	-	-	-	-	-	-	-	-1.24767	-	-	0.000221451	-	-	DEG
ARF4	A0A0D9RIL8	ADP-ribosylation factor	cytosol [GO:0005829]; dendritic spine [GO:0043197]; glutamatergic synapse [GO:0098978]; Golgi membrane [GO:0000139]; ruffle membrane [GO:0032587]; epidermal growth factor receptor binding [GO:0005154]; GTP binding [GO:0005525]; GTPase activity [GO:0003924]; NAD+-protein-arginine ADP-ribosyltransferase activity [GO:0106274]; phospholipase D activator activity [GO:1990583]; apical protein localizat…	GTP-binding protein involved in protein trafficking; modulates vesicle budding and uncoating within the Golgi apparatus. {ECO:0000256|RuleBase:RU369003}.	-	-	-	-	-	-	-	-	-	-	-	-1.08617	-	-	0.00362661	-	-	DEG
ARF5	A0A0D9RCV7	ADP-ribosylation factor	Golgi apparatus [GO:0005794]; plasma membrane [GO:0005886]; GTP binding [GO:0005525]; GTPase activity [GO:0003924]; protein transport [GO:0015031]; retrograde vesicle-mediated transport, Golgi to endoplasmic reticulum [GO:0006890]	GTP-binding protein involved in protein trafficking; modulates vesicle budding and uncoating within the Golgi apparatus. {ECO:0000256|RuleBase:RU369003}.	-	-	-	-	-	-	-	-	-	-	-	-1.41843	-	-	0.00775448	-	-	DEG
ARFGAP1	A0A0D9RUT3	ADP ribosylation factor GTPase activating protein 1	Golgi membrane [GO:0000139]; synapse [GO:0045202]; GTPase activator activity [GO:0005096]; regulation of ARF protein signal transduction [GO:0032012]; regulation of endocytosis [GO:0030100]	-	-	-	exon (XM_008011175.2, exon 11 of 16)	-1.12493	-	-	1.6448e-05	-	-	-	-	-	-	-	-	DMR	-	-
ARFGAP1	A0A0D9RUT3	ADP ribosylation factor GTPase activating protein 1	Golgi membrane [GO:0000139]; synapse [GO:0045202]; GTPase activator activity [GO:0005096]; regulation of ARF protein signal transduction [GO:0032012]; regulation of endocytosis [GO:0030100]	-	-	-	exon (XM_008011175.2, exon 13 of 16)	-1.10348	-	-	0.000269932	-	-	-	-	-	-	-	-	DMR	-	-
ARFIP2	A0A0D9QWC9	ADP ribosylation factor interacting protein 2	cell cortex [GO:0005938]; nucleolus [GO:0005730]; ruffle [GO:0001726]; trans-Golgi network membrane [GO:0032588]; GTP-dependent protein binding [GO:0030742]; identical protein binding [GO:0042802]; membrane curvature sensor activity [GO:0140090]; phosphatidylinositol-4-phosphate binding [GO:0070273]; protein domain specific binding [GO:0019904]; actin cytoskeleton organization [GO:0030036]; intra…	-	-	-	promoter-TSS (XM_008008621.2)	-1.58169	-	-	0.00086683	-	-	-	-	-	-	-	-	DMR	-	-
ARFRP1	A0A0D9RVM9	ADP-ribosylation factor-related protein 1	cytosol [GO:0005829]; membrane [GO:0016020]; trans-Golgi network [GO:0005802]; GTP binding [GO:0005525]; GTPase activity [GO:0003924]; gastrulation [GO:0007369]; Golgi to plasma membrane protein transport [GO:0043001]; intracellular protein transport [GO:0006886]; protein localization to Golgi apparatus [GO:0034067]; retrograde transport, endosome to Golgi [GO:0042147]	Trans-Golgi-associated GTPase that regulates protein sorting. Controls the targeting of ARL1 and its effector to the trans-Golgi. Required for the lipidation of chylomicrons in the intestine and required for VLDL lipidation in the liver. {ECO:0000256|ARBA:ARBA00037377}.	-	-	exon (XM_008010714.2, exon 8 of 8)	-1.35153	-1.10722	-	0.00259208	0.00463847	-	-	-	-	-	-	-	DMR	DMR	-
ARHGAP1	A0A0D9R051	Rho GTPase activating protein 1	endosome membrane [GO:0010008]; perinuclear region of cytoplasm [GO:0048471]; sorting endosome [GO:0097443]; GTPase activator activity [GO:0005096]; small GTPase binding [GO:0031267]; endosomal transport [GO:0016197]; negative regulation of endocytic recycling [GO:2001136]; small GTPase-mediated signal transduction [GO:0007264]; transferrin transport [GO:0033572]	-	-	-	-	-	-	-	-	-	-	-	-	-1.88945	-	-	2.09194e-06	-	-	DEG
ARHGAP12	A0A0D9RGS7	Rho GTPase activating protein 12	cytoplasm [GO:0005737]; phagocytic cup [GO:0001891]; GTPase activator activity [GO:0005096]; actin filament organization [GO:0007015]; morphogenesis of an epithelial sheet [GO:0002011]; negative regulation of small GTPase mediated signal transduction [GO:0051058]; phagocytosis, engulfment [GO:0006911]; signal transduction [GO:0007165]	-	-	-	-	-	-	-	-	-	-	-	-	1.3902	-	-	0.00294566	-	-	DEG
ARHGAP18	A0A0D9RVJ0	Rho GTPase activating protein 18	cytoplasmic microtubule [GO:0005881]; cytosol [GO:0005829]; nuclear speck [GO:0016607]; plasma membrane [GO:0005886]; ruffle [GO:0001726]; GTPase activator activity [GO:0005096]; regulation of actin filament polymerization [GO:0030833]; regulation of cell motility [GO:2000145]; regulation of cell shape [GO:0008360]; regulation of small GTPase mediated signal transduction [GO:0051056]; small GTPas…	-	-	-	-	-	-	-	-	-	-	-	-	-1.57248	-	-	0.00578623	-	-	DEG
ARHGAP23	A0A0D9S3H3	Rho GTPase activating protein 23	GTPase activator activity [GO:0005096]; signal transduction [GO:0007165]	-	-	-	exon (XM_008012931.2, exon 7 of 24)	-	1.15815	-	-	0.00148492	-	-	-	-	-	-	-	-	DMR	-
ARHGAP24	-	-	-	-	-	-	-	-	-	-	-	-	-	-	-	-1.05368	-	-	0.0266143	-	-	DEG
ARHGAP27	A0A0D9QUL6	Rho GTPase activating protein 27	cytoplasm [GO:0005737]; actin filament binding [GO:0051015]; GTPase activator activity [GO:0005096]; protein heterooligomerization [GO:0051291]; signal transduction [GO:0007165]	-	-	-	-	-	-	-	-	-	-	-	-	1.80285	-	-	0.0207774	-	-	DEG
ARHGAP29	A0A0D9S6Q3	Rho GTPase-activating protein 29 (Rho-type GTPase-activating protein 29)	cytoplasm [GO:0005737]; protein-containing complex [GO:0032991]; GTPase activator activity [GO:0005096]; metal ion binding [GO:0046872]; PDZ domain binding [GO:0030165]; regulation of small GTPase mediated signal transduction [GO:0051056]; signal transduction [GO:0007165]	-	-	-	-	-	-	-	-	-	-	-	-	-1.77729	-	-	3.61075e-06	-	-	DEG
ARHGAP31	A0A0D9R3V7	Rho GTPase activating protein 31	lamellipodium [GO:0030027]; GTPase activator activity [GO:0005096]; SH3 domain binding [GO:0017124]; small GTPase-mediated signal transduction [GO:0007264]	-	-	-	exon (XM_038003366.1, exon 12 of 12)	1.49337	-1.54038	-	1.2774e-21	0.000732303	-	-	-	-	-	-	-	DMR	DMR	-
ARHGAP32	A0A0D9S4N3	Rho GTPase activating protein 32	actin cytoskeleton [GO:0015629]; cell cortex [GO:0005938]; fibrillar center [GO:0001650]; Golgi apparatus [GO:0005794]; nucleoplasm [GO:0005654]; postsynaptic density [GO:0014069]; GTPase activator activity [GO:0005096]; phosphatidylinositol phosphate binding [GO:1901981]; small GTPase-mediated signal transduction [GO:0007264]	-	-	-	-	-	-	-	-	-	-	-	-	1.27956	-	-	0.000860371	-	-	DEG
ARHGAP42	A0A0D9S1P3	Rho GTPase activating protein 42	cytoplasm [GO:0005737]; GTPase activator activity [GO:0005096]; negative regulation of Rho protein signal transduction [GO:0035024]; negative regulation of systemic arterial blood pressure [GO:0003085]; negative regulation of vascular associated smooth muscle contraction [GO:1904694]; signal transduction [GO:0007165]	-	-	-	exon (XM_038005287.1, exon 7 of 24)	2.02054	-	-	0.00719755	-	-	-	-	-	-	-	-	DMR	-	-
ARHGAP6	A0A0D9RRS4	Rho GTPase activating protein 6	actin cytoskeleton [GO:0015629]; cytosol [GO:0005829]; GTPase activator activity [GO:0005096]; phospholipase activator activity [GO:0016004]; phospholipase binding [GO:0043274]; actin filament organization [GO:0007015]; focal adhesion assembly [GO:0048041]; negative regulation of focal adhesion assembly [GO:0051895]; negative regulation of stress fiber assembly [GO:0051497]; signal transduction […	-	-	-	exon (XM_037986570.1, exon 5 of 5)	-1.31698	-	-	0.000547388	-	-	-	-	-	-	-	-	DMR	-	-
ARHGDIA	A0A0D9S4M8	Rho GDP-dissociation inhibitor 1 (Rho-GDI alpha)	cytosol [GO:0005829]; immunological synapse [GO:0001772]; nucleus [GO:0005634]; Schaffer collateral - CA1 synapse [GO:0098685]; GTPase activator activity [GO:0005096]; Rho GDP-dissociation inhibitor activity [GO:0005094]; regulation of protein localization [GO:0032880]; regulation of Rho protein signal transduction [GO:0035023]; regulation of synaptic vesicle cycle [GO:0098693]; Rho protein signa…	Controls Rho proteins homeostasis. Regulates the GDP/GTP exchange reaction of the Rho proteins by inhibiting the dissociation of GDP from them, and the subsequent binding of GTP to them. Retains Rho proteins such as CDC42, RAC1 and RHOA in an inactive cytosolic pool, regulating their stability and protecting them from degradation. Actively involved in the recycling and distribution of activated R…	-	-	-	-	-	-	-	-	-	-	-	-1.57953	-	-	0.0105953	-	-	DEG
ARHGEF12	A0A0D9S3Y4	Rho guanine nucleotide exchange factor 12	cytoplasm [GO:0005737]; membrane [GO:0016020]; G protein-coupled receptor binding [GO:0001664]; GTPase activator activity [GO:0005096]; guanyl-nucleotide exchange factor activity [GO:0005085]; G protein-coupled receptor signaling pathway [GO:0007186]; Rho protein signal transduction [GO:0007266]	-	-	-	exon (XM_038005085.1, exon 1 of 41)	-	-1.14625	-	-	4.46422e-13	-	-	-	-	-	-	-	-	DMR	-
ARHGEF12	A0A0D9S3Y4	Rho guanine nucleotide exchange factor 12	cytoplasm [GO:0005737]; membrane [GO:0016020]; G protein-coupled receptor binding [GO:0001664]; GTPase activator activity [GO:0005096]; guanyl-nucleotide exchange factor activity [GO:0005085]; G protein-coupled receptor signaling pathway [GO:0007186]; Rho protein signal transduction [GO:0007266]	-	-	-	exon (XM_038005085.1, exon 18 of 41)	1.14322	-	-	2.52447e-34	-	-	-	-	-	-	-	-	DMR	-	-
ARHGEF12	A0A0D9S3Y4	Rho guanine nucleotide exchange factor 12	cytoplasm [GO:0005737]; membrane [GO:0016020]; G protein-coupled receptor binding [GO:0001664]; GTPase activator activity [GO:0005096]; guanyl-nucleotide exchange factor activity [GO:0005085]; G protein-coupled receptor signaling pathway [GO:0007186]; Rho protein signal transduction [GO:0007266]	-	-	-	exon (XM_038005085.1, exon 30 of 41)	1.56417	-	-	5.63438e-98	-	-	-	-	-	-	-	-	DMR	-	-
ARHGEF12	A0A0D9S3Y4	Rho guanine nucleotide exchange factor 12	cytoplasm [GO:0005737]; membrane [GO:0016020]; G protein-coupled receptor binding [GO:0001664]; GTPase activator activity [GO:0005096]; guanyl-nucleotide exchange factor activity [GO:0005085]; G protein-coupled receptor signaling pathway [GO:0007186]; Rho protein signal transduction [GO:0007266]	-	-	-	exon (XM_038005085.1, exon 41 of 41)	1.48231	-	-	3.83175e-13	-	-	-	-	-	-	-	-	DMR	-	-
ARHGEF17	A0A0D9QVP3	Rho guanine nucleotide exchange factor 17	guanyl-nucleotide exchange factor activity [GO:0005085]; actin cytoskeleton organization [GO:0030036]	-	-	-	exon (XM_008020093.2, exon 6 of 21)	-	-1.0574	-	-	0.00961589	-	-	-	-	-	-	-	-	DMR	-
ARHGEF33	A0A0D9RIU3	Rho guanine nucleotide exchange factor 33	guanyl-nucleotide exchange factor activity [GO:0005085]	-	-	-	-	-	-	-	-	-	-	-	-	1.89443	-	-	0.0351813	-	-	DEG
ARHGEF37	A0A0D9RHB0	Rho guanine nucleotide exchange factor 37	cytoplasm [GO:0005737]; guanyl-nucleotide exchange factor activity [GO:0005085]	-	-	-	-	-	-	-	-	-	-	-	-	1.96912	-	-	0.0132	-	-	DEG
ARHGEF40	A0A0D9RVM7	Rho guanine nucleotide exchange factor 40	cytosol [GO:0005829]; plasma membrane [GO:0005886]; guanyl-nucleotide exchange factor activity [GO:0005085]	-	-	-	exon (XM_007990709.2, exon 10 of 24)	-1.63506	-	-	0.000112061	-	-	-	-	-	-	-	-	DMR	-	-
ARHGEF40	A0A0D9RVM7	Rho guanine nucleotide exchange factor 40	cytosol [GO:0005829]; plasma membrane [GO:0005886]; guanyl-nucleotide exchange factor activity [GO:0005085]	-	-	-	exon (XM_007990709.2, exon 17 of 24)	-	-1.23368	-	-	0.00019753	-	-	-	-	-	-	-	-	DMR	-
ARHGEF40	A0A0D9RVM7	Rho guanine nucleotide exchange factor 40	cytosol [GO:0005829]; plasma membrane [GO:0005886]; guanyl-nucleotide exchange factor activity [GO:0005085]	-	-	-	exon (XM_007990709.2, exon 4 of 24)	-	-1.29799	-	-	0.0345194	-	-	-	-	-	-	-	-	DMR	-
ARHGEF40	A0A0D9RVM7	Rho guanine nucleotide exchange factor 40	cytosol [GO:0005829]; plasma membrane [GO:0005886]; guanyl-nucleotide exchange factor activity [GO:0005085]	-	-	-	exon (XM_007990709.2, exon 9 of 24)	-	-1.88955	-	-	2.86008e-05	-	-	-	-	-	-	-	-	DMR	-
ARHGEF40	A0A0D9RVM7	Rho guanine nucleotide exchange factor 40	cytosol [GO:0005829]; plasma membrane [GO:0005886]; guanyl-nucleotide exchange factor activity [GO:0005085]	-	-	-	promoter-TSS (XM_007990709.2)	-	-1.27515	-	-	0.000124034	-	-	-	-	-	-	-	-	DMR	-
ARHGEF5	A0A0D9R437	Rho guanine nucleotide exchange factor 5	cytosol [GO:0005829]; nucleoplasm [GO:0005654]; plasma membrane [GO:0005886]; guanyl-nucleotide exchange factor activity [GO:0005085]; actin cytoskeleton organization [GO:0030036]; hematopoietic stem cell homeostasis [GO:0061484]; intracellular signal transduction [GO:0035556]; myeloid dendritic cell chemotaxis [GO:0002408]; positive regulation of podosome assembly [GO:0071803]; positive regulati…	-	-	GO:0002376~immune system process	exon (XM_007983322.2, exon 14 of 15)	-	-1.25191	-	-	0.0176789	-	-	-	-	-	-	-	-	DMR	-
ARHGEF5	A0A0D9R437	Rho guanine nucleotide exchange factor 5	cytosol [GO:0005829]; nucleoplasm [GO:0005654]; plasma membrane [GO:0005886]; guanyl-nucleotide exchange factor activity [GO:0005085]; actin cytoskeleton organization [GO:0030036]; hematopoietic stem cell homeostasis [GO:0061484]; intracellular signal transduction [GO:0035556]; myeloid dendritic cell chemotaxis [GO:0002408]; positive regulation of podosome assembly [GO:0071803]; positive regulati…	-	-	GO:0002376~immune system process	exon (XM_007983322.2, exon 13 of 15)	-	-1.208	-	-	0.0101274	-	-	-	-	-	-	-	-	DMR	-
ARHGEF9	A0A0D9RI01	Rho guanine nucleotide exchange factor 9 (Collybistin) (Rac/Cdc42 guanine nucleotide exchange factor 9)	cytosol [GO:0005829]; postsynaptic density [GO:0014069]; guanyl-nucleotide exchange factor activity [GO:0005085]	Acts as a guanine nucleotide exchange factor (GEF) for CDC42. Promotes formation of GPHN clusters. {ECO:0000256|ARBA:ARBA00043844}.	-	-	exon (XM_007991889.2, exon 8 of 10)	-1.00108	-	-	0.00275232	-	-	-	-	-	-	-	-	DMR	-	-
ARID2	A0A0D9R346	AT-rich interaction domain 2	nucleoplasm [GO:0005654]; plasma membrane [GO:0005886]; SWI/SNF complex [GO:0016514]; DNA binding [GO:0003677]; cardiac muscle cell proliferation [GO:0060038]; coronary artery morphogenesis [GO:0060982]; embryonic organ development [GO:0048568]; heart morphogenesis [GO:0003007]; homeostatic process [GO:0042592]; negative regulation of cell migration [GO:0030336]; negative regulation of cell popul…	-	-	-	exon (XM_037997235.1, exon 19 of 21)	1.34807	-	-	0.011724	-	-	-	-	-	-	-	-	DMR	-	-
ARID2	A0A0D9R346	AT-rich interaction domain 2	nucleoplasm [GO:0005654]; plasma membrane [GO:0005886]; SWI/SNF complex [GO:0016514]; DNA binding [GO:0003677]; cardiac muscle cell proliferation [GO:0060038]; coronary artery morphogenesis [GO:0060982]; embryonic organ development [GO:0048568]; heart morphogenesis [GO:0003007]; homeostatic process [GO:0042592]; negative regulation of cell migration [GO:0030336]; negative regulation of cell popul…	-	-	-	exon (XM_037997235.1, exon 8 of 21)	1.09265	-	-	0.00621646	-	-	-	-	-	-	-	-	DMR	-	-
ARID3B	A0A0D9RP25	AT-rich interactive domain-containing protein 3 (ARID domain-containing protein)	nucleoplasm [GO:0005654]; DNA binding [GO:0003677]; positive regulation of transcription by RNA polymerase II [GO:0045944]	Transcription factor. {ECO:0000256|RuleBase:RU369100}.	-	-	-	-	-	-	-	-	-	-	-	2.61479	-	-	0.00302298	-	-	DEG
ARIH2	A0A0D9RRZ6	RBR-type E3 ubiquitin transferase (EC 2.3.2.31)	Cul5-RING ubiquitin ligase complex [GO:0031466]; cytoplasm [GO:0005737]; nucleoplasm [GO:0005654]; ubiquitin conjugating enzyme binding [GO:0031624]; ubiquitin protein ligase activity [GO:0061630]; zinc ion binding [GO:0008270]; hematopoietic stem cell proliferation [GO:0071425]; proteasome-mediated ubiquitin-dependent protein catabolic process [GO:0043161]; protein K48-linked ubiquitination [GO:…	-	-	-	-	-	-	-	-	-	-	-	-	1.25356	-	-	0.000939219	-	-	DEG
ARL1	A0A0D9S1E3	ADP ribosylation factor like GTPase 1	cytosol [GO:0005829]; trans-Golgi network [GO:0005802]; GTP binding [GO:0005525]; GTPase activity [GO:0003924]; phospholipase D activator activity [GO:1990583]; protein domain specific binding [GO:0019904]; protein localization to Golgi apparatus [GO:0034067]; retrograde transport, endosome to Golgi [GO:0042147]; toxin metabolic process [GO:0009404]	-	-	-	-	-	-	-	-	-	-	-	-	-1.40388	-	-	0.00220226	-	-	DEG
ARL13B	A0A0D9R0W4	ADP ribosylation factor like GTPase 13B	ciliary membrane [GO:0060170]; motile cilium [GO:0031514]; non-motile cilium [GO:0097730]; GTP binding [GO:0005525]; GTPase activity [GO:0003924]; non-motile cilium assembly [GO:1905515]; receptor localization to non-motile cilium [GO:0097500]	-	-	-	exon (XM_007986145.2, exon 1 of 9)	1.42759	-	-	1.75221e-09	-	-	-	-	-	-	-	-	DMR	-	-
ARL2	A0A0D9R5D2	ADP-ribosylation factor-like protein 2	centrosome [GO:0005813]; cytosol [GO:0005829]; focal adhesion [GO:0005925]; Golgi apparatus [GO:0005794]; mitochondrial intermembrane space [GO:0005758]; nucleolus [GO:0005730]; nucleoplasm [GO:0005654]; GDP binding [GO:0019003]; GTP binding [GO:0005525]; GTPase activity [GO:0003924]; centrosome cycle [GO:0007098]; maintenance of protein location in nucleus [GO:0051457]; positive regulation of mi…	-	-	-	-	-	-	-	-	-	-	-	-	-2.40827	-	-	2.5291e-06	-	-	DEG
ARL3	A0A0D9QZC8	ADP ribosylation factor like GTPase 3	axoneme [GO:0005930]; centrosome [GO:0005813]; ciliary basal body [GO:0036064]; cytoplasmic microtubule [GO:0005881]; Golgi membrane [GO:0000139]; midbody [GO:0030496]; nucleoplasm [GO:0005654]; photoreceptor connecting cilium [GO:0032391]; spindle microtubule [GO:0005876]; GDP binding [GO:0019003]; GTP binding [GO:0005525]; GTPase activity [GO:0003924]; magnesium ion binding [GO:0000287]; microt…	-	-	-	-	-	-	-	-	-	-	-	-	-1.34003	-	-	0.0149961	-	-	DEG
ARL6IP1	A0A0D9R6H5	Small ribosomal subunit protein uS8 (40S ribosomal protein S15a)	ribonucleoprotein complex [GO:1990904]; ribosome [GO:0005840]; Sec61 translocon complex [GO:0005784]; structural constituent of ribosome [GO:0003735]; cotranslational protein targeting to membrane [GO:0006613]; translation [GO:0006412]	-	-	-	-	-	-	-	-	-	-	-	-	-2.35518	-	-	2.92644e-16	-	-	DEG
ARL6IP4	A0A0D9S520	ADP-ribosylation factor-like protein 6-interacting protein 4	nuclear speck [GO:0016607]; nucleolus [GO:0005730]; mRNA processing [GO:0006397]; RNA splicing [GO:0008380]	-	-	-	-	-	-	-	-	-	-	-	-	-1.58755	-	-	0.0145543	-	-	DEG
ARL6IP5	A0A0D9RGU3	PRA1 family protein	cytoskeleton [GO:0005856]; endoplasmic reticulum membrane [GO:0005789]; plasma membrane [GO:0005886]; presynaptic cytosol [GO:0099523]; cellular response to organic cyclic compound [GO:0071407]; cellular response to oxidative stress [GO:0034599]; glutathione metabolic process [GO:0006749]; intrinsic apoptotic signaling pathway in response to oxidative stress [GO:0008631]; L-glutamate import acros…	-	-	-	-	-	-	-	-	-	-	-	-	-1.47272	-	-	0.0180587	-	-	DEG
ARL8B	A0A0D9RES0	ADP-ribosylation factor-like protein 8B (EC 3.6.5.2)	axon cytoplasm [GO:1904115]; cytolytic granule membrane [GO:0101004]; cytosol [GO:0005829]; early endosome membrane [GO:0031901]; late endosome membrane [GO:0031902]; midbody [GO:0030496]; spindle midzone [GO:0051233]; synapse [GO:0045202]; alpha-tubulin binding [GO:0043014]; beta-tubulin binding [GO:0048487]; G protein activity [GO:0003925]; GDP binding [GO:0019003]; GTP binding [GO:0005525]; an…	-	-	-	exon (XM_007985075.2, exon 4 of 8)	1.03684	-	-	4.87134e-07	-	-	-	-	-	-	-	-	DMR	-	-
ARMCX2	A0A0D9RBQ6	Armadillo repeat containing X-linked 2	mitochondrial outer membrane [GO:0005741]	-	-	-	exon (XM_007992313.2, exon 5 of 5)	-	-1.02296	-	-	9.23773e-05	-	-	-	-	-	-	-	-	DMR	-
ARNTL	-	-	-	-	-	-	-	-	-	-	-	-	-	-	-	1.92183	-	-	6.94321e-07	-	-	DEG
ARNTL2	-	-	-	-	-	-	exon (XM_007968013.2, exon 10 of 18)	1.49487	-	-	4.95369e-14	-	-	-	-	-	-	-	-	DMR	-	-
ARNTL2	-	-	-	-	-	-	exon (XM_007968013.2, exon 6 of 18)	1.81792	-	-	9.66387e-05	-	-	-	-	-	-	-	-	DMR	-	-
ARPC1B	A0A0D9RYW8	Actin-related protein 2/3 complex subunit	Arp2/3 protein complex [GO:0005885]; cytoplasm [GO:0005737]; nucleus [GO:0005634]; actin filament binding [GO:0051015]; Arp2/3 complex-mediated actin nucleation [GO:0034314]	Functions as component of the Arp2/3 complex which is involved in regulation of actin polymerization and together with an activating nucleation-promoting factor (NPF) mediates the formation of branched actin networks. {ECO:0000256|PIRNR:PIRNR038093}.	-	-	-	-	-	-	-	-	-	-	-	-2.33128	-	-	1.20057e-08	-	-	DEG
ARPC3	-	-	-	-	-	-	-	-	-	-	-	-	-	-	-	-1.86764	-	-	2.43879e-06	-	-	DEG
ARPC4	A0A0D9RDV7	Actin-related protein 2/3 complex subunit 4	Arp2/3 protein complex [GO:0005885]; cytoplasm [GO:0005737]; actin filament binding [GO:0051015]; enzyme binding [GO:0019899]; protein-macromolecule adaptor activity [GO:0030674]; structural constituent of cytoskeleton [GO:0005200]; actin filament polymerization [GO:0030041]; Arp2/3 complex-mediated actin nucleation [GO:0034314]	Functions as actin-binding component of the Arp2/3 complex which is involved in regulation of actin polymerization and together with an activating nucleation-promoting factor (NPF) mediates the formation of branched actin networks. Seems to contact the mother actin filament. {ECO:0000256|PIRNR:PIRNR039100}.	-	-	-	-	-	-	-	-	-	-	-	-1.46754	-	-	0.0136331	-	-	DEG
ARPC5	A0A0D9RJR5	Actin-related protein 2/3 complex subunit 5	Arp2/3 protein complex [GO:0005885]; cytoplasm [GO:0005737]; lamellipodium [GO:0030027]; nucleus [GO:0005634]; actin filament binding [GO:0051015]; structural constituent of cytoskeleton [GO:0005200]; Arp2/3 complex-mediated actin nucleation [GO:0034314]; cell migration [GO:0016477]; regulation of actin filament polymerization [GO:0030833]	Functions as component of the Arp2/3 complex which is involved in regulation of actin polymerization and together with an activating nucleation-promoting factor (NPF) mediates the formation of branched actin networks. Arp2/3 complex plays a critical role in the control of cell morphogenesis via the modulation of cell polarity development. {ECO:0000256|RuleBase:RU004301}.	-	-	-	-	-	-	-	-	-	-	-	-1.90292	-	-	7.26727e-05	-	-	DEG
ARRDC3	A0A0D9RQA9	Arrestin domain-containing protein 3	early endosome [GO:0005769]; lysosome [GO:0005764]; plasma membrane [GO:0005886]; beta-3 adrenergic receptor binding [GO:0031699]; fat pad development [GO:0060613]; heat generation [GO:0031649]; negative regulation of adenylate cyclase-activating adrenergic receptor signaling pathway [GO:0071878]; negative regulation of cold-induced thermogenesis [GO:0120163]; negative regulation of heat generati…	Adapter protein that plays a role in regulating cell-surface expression of adrenergic receptors and probably also other G protein-coupled receptors. Plays a role in NEDD4-mediated ubiquitination and endocytosis af activated ADRB2 and subsequent ADRB2 degradation. May recruit NEDD4 to ADRB2. Alternatively, may function as adapter protein that does not play a major role in recruiting NEDD4 to ADRB2…	-	-	-	-	-	-	-	-	-	-	-	1.95708	-	-	2.33261e-16	-	-	DEG
ARRDC4	A0A0D9RWL6	Arrestin domain containing 4	endosome [GO:0005768]; extracellular vesicle [GO:1903561]; plasma membrane [GO:0005886]; ubiquitin-like ligase-substrate adaptor activity [GO:1990756]; extracellular vesicle biogenesis [GO:0140112]; positive regulation of interferon-beta production [GO:0032728]; protein K63-linked ubiquitination [GO:0070534]; protein transport [GO:0015031]	-	-	-	-	-	-	-	-	-	-	-	-	2.11806	-	-	0.00362418	-	-	DEG
ARSB	A0A0D9RRW7	Arylsulfatase B	N-acetylgalactosamine-4-sulfatase activity [GO:0003943]; colon epithelial cell migration [GO:0061580]; regulation of epithelial cell migration [GO:0010632]	-	-	-	-	-	-	-	-	-	-	-	-	-2.66578	-	-	2.49033e-05	-	-	DEG
ARSJ	A0A0D9QUW9	Arylsulfatase family member J	actin cytoskeleton [GO:0015629]; membrane [GO:0016020]; sulfuric ester hydrolase activity [GO:0008484]	-	-	-	exon (XM_007999637.2, exon 3 of 3)	1.0072	-	-	0.000765879	-	-	-	-	-1.25475	-	-	0.000291549	DMR	-	DEG
ARV1	A0A0D9RDE7	Protein ARV	cortical endoplasmic reticulum [GO:0032541]; endoplasmic reticulum membrane [GO:0005789]; Golgi apparatus [GO:0005794]; bile acid metabolic process [GO:0008206]; cholesterol transport [GO:0030301]; intracellular sterol transport [GO:0032366]; regulation of cholesterol metabolic process [GO:0090181]; regulation of intracellular cholesterol transport [GO:0032383]; regulation of plasma membrane ster…	Mediator of sterol homeostasis involved in sterol uptake, trafficking and distribution into membranes. {ECO:0000256|RuleBase:RU368065}.	-	-	exon (XM_007989770.2, exon 5 of 6)	1.23425	-	-	0.011549	-	-	-	-	-	-	-	-	DMR	-	-
ARVCF	A0A0D9RHR6	ARVCF delta catenin family member	adherens junction [GO:0005912]; cytoplasm [GO:0005737]; nucleus [GO:0005634]; plasma membrane [GO:0005886]; cadherin binding [GO:0045296]; cell-cell adhesion [GO:0098609]; RNA splicing [GO:0008380]	-	-	-	exon (XM_007975018.2, exon 5 of 16)	-	-1.09261	-	-	0.0130098	-	-	-	-	-	-	-	-	DMR	-
ASAH1	A0A0D9RVZ2	Acid ceramidase (EC 3.5.1.23)	extracellular space [GO:0005615]; lysosome [GO:0005764]; membrane [GO:0016020]; fatty acid amide hydrolase activity [GO:0017064]; N-acylsphingosine amidohydrolase activity [GO:0017040]; ceramide biosynthetic process [GO:0046513]; ceramide catabolic process [GO:0046514]; fatty acid metabolic process [GO:0006631]; keratinocyte differentiation [GO:0030216]; regulation of steroid biosynthetic process…	-	-	-	-	-	-	-	-	-	-	-	-	-3.03366	-	-	4.66356e-12	-	-	DEG
ASAP3	A0A0D9S894	ArfGAP with SH3 domain, ankyrin repeat and PH domain 3	cytosol [GO:0005829]; focal adhesion [GO:0005925]; nucleoplasm [GO:0005654]; ruffle [GO:0001726]; GTPase activator activity [GO:0005096]; metal ion binding [GO:0046872]; cell migration [GO:0016477]; regulation of stress fiber assembly [GO:0051492]	-	-	-	-	-	-	-	-	-	-	-	-1.23833	-	-	4.41727e-06	-	-	DEG	-
ASB2	A0A0D9RF35	Ankyrin repeat and SOCS box containing 2	ubiquitin ligase complex [GO:0000151]; cullin family protein binding [GO:0097602]; ubiquitin protein ligase activity [GO:0061630]; actin cytoskeleton organization [GO:0030036]; cardiac muscle cell development [GO:0055013]; heart looping [GO:0001947]; intracellular signal transduction [GO:0035556]; proteasome-mediated ubiquitin-dependent protein catabolic process [GO:0043161]; protein ubiquitinati…	-	-	-	exon (XM_007987674.2, exon 8 of 8)	-1.811	-	-	3.30254e-93	-	-	-	-	-	-	-	-	DMR	-	-
ASB3	A0A0D9RMP9	Ankyrin repeat and SOCS box containing 3	cytoplasm [GO:0005737]; intracellular signal transduction [GO:0035556]; protein ubiquitination [GO:0016567]	-	-	-	exon (XM_038006919.1, exon 3 of 10)	1.2514	-	-	0.00144524	-	-	-	-	-	-	-	-	DMR	-	-
ASB3	A0A0D9RMP9	Ankyrin repeat and SOCS box containing 3	cytoplasm [GO:0005737]; intracellular signal transduction [GO:0035556]; protein ubiquitination [GO:0016567]	-	-	-	promoter-TSS (XM_038006925.1)	1.04064	-	-	0.0149575	-	-	-	-	-	-	-	-	DMR	-	-
ASB6	A0A0D9RQ36	Ankyrin repeat and SOCS box containing 6	intracellular signal transduction [GO:0035556]; protein ubiquitination [GO:0016567]	-	-	-	TTS (XM_008005970.2)	-	-1.02729	-	-	0.0211604	-	-	-	-	-	-	-	-	DMR	-
ASCC3	A0A0D9RQA2	Activating signal cointegrator 1 complex subunit 3	activating signal cointegrator 1 complex [GO:0099053]; cytosolic ribosome [GO:0022626]; DNA repair complex [GO:1990391]; 3'-5' DNA helicase activity [GO:0043138]; ATP binding [GO:0005524]; ATP hydrolysis activity [GO:0016887]; nucleic acid binding [GO:0003676]; DNA alkylation repair [GO:0006307]; rescue of stalled ribosome [GO:0072344]; ribosome-associated ubiquitin-dependent protein catabolic pr…	-	-	-	exon (XM_008007490.2, exon 6 of 42)	1.49332	-	-	5.65268e-09	-	-	-	-	-	-	-	-	DMR	-	-
ASIC3	A0A0D9R308	Acid sensing ion channel subunit 3	plasma membrane [GO:0005886]; enterobactin transmembrane transporter activity [GO:0042931]; ligand-gated sodium channel activity [GO:0015280]; pH-gated monoatomic ion channel activity [GO:0160128]; detection of chemical stimulus involved in sensory perception of pain [GO:0050968]; detection of mechanical stimulus involved in sensory perception of pain [GO:0050966]; detection of temperature stimul…	-	-	-	-	-	-	-	-	-	-	-	-	2.02427	-	-	0.0208699	-	-	DEG
ASIC4	A0A0D9R6I4	Acid sensing ion channel subunit family member 4	plasma membrane [GO:0005886]; ligand-gated sodium channel activity [GO:0015280]; behavioral fear response [GO:0001662]	-	-	-	TTS (XM_007966411.2)	-1.94813	-	-	2.31136e-81	-	-	-	-	-	-	-	-	DMR	-	-
ASPH	A0A0D9RPB3	Aspartate beta-hydroxylase	cortical endoplasmic reticulum [GO:0032541]; plasma membrane [GO:0005886]; sarcoplasmic reticulum membrane [GO:0033017]; peptidyl-aspartic acid 3-dioxygenase activity [GO:0062101]; positive regulation of proteolysis [GO:0045862]	-	-	-	exon (XM_008000738.2, exon 6 of 6)	-	1.17	-	-	0.00232137	-	-	-	-1.12935	-	-	8.6775e-05	-	DMR	DEG
ASPSCR1	A0A0D9S4S2	ASPSCR1 tether for SLC2A4, UBX domain containing	cytoplasmic side of plasma membrane [GO:0009898]; cytosol [GO:0005829]; nucleoplasm [GO:0005654]; perinuclear region of cytoplasm [GO:0048471]; vesicle membrane [GO:0012506]; glucose homeostasis [GO:0042593]; intracellular protein transport [GO:0006886]; positive regulation of protein modification process [GO:0031401]; regulation of D-glucose import [GO:0046324]	-	-	-	exon (XM_037993446.1, exon 7 of 17)	-2.47336	-	-	1.90214e-10	-	-	-	-	-	-	-	-	DMR	-	-
ASRGL1	A0A0D9R2I6	Isoaspartyl peptidase/L-asparaginase (EC 3.4.19.5) (EC 3.5.1.1) (Asparaginase-like protein 1) (Beta-aspartyl-peptidase) (Isoaspartyl dipeptidase) (L-asparagine amidohydrolase)	cytoplasm [GO:0005737]; photoreceptor inner segment [GO:0001917]; asparaginase activity [GO:0004067]; beta-aspartyl-peptidase activity [GO:0008798]; asparagine catabolic process via L-aspartate [GO:0033345]; proteolysis [GO:0006508]	-	-	-	-	-	-	-	-	-	-	-	-	-2.37663	-	-	0.000707094	-	-	DEG
ATF3	A0A0D9RSA2	Activating transcription factor 3	CHOP-ATF3 complex [GO:1990622]; nucleolus [GO:0005730]; nucleoplasm [GO:0005654]; RNA polymerase II transcription regulator complex [GO:0090575]; DNA-binding transcription activator activity, RNA polymerase II-specific [GO:0001228]; DNA-binding transcription repressor activity, RNA polymerase II-specific [GO:0001227]; protein heterodimerization activity [GO:0046982]; protein homodimerization acti…	-	-	-	exon (XM_007988501.2, exon 3 of 4)	-1.11069	-	-	8.80462e-10	-	-	-	-	2.65853	-	-	0.0333756	DMR	-	DEG
ATIC	-	-	-	-	-	-	-	-	-	-	-	-	-	-	-	-1.12675	-	-	0.0194847	-	-	DEG
ATL1	A0A0D9RRJ9	Atlastin GTPase 1	axon [GO:0030424]; endoplasmic reticulum tubular network membrane [GO:0098826]; Golgi membrane [GO:0000139]; GTP binding [GO:0005525]; GTPase activity [GO:0003924]; identical protein binding [GO:0042802]; endoplasmic reticulum tubular network membrane organization [GO:1990809]; protein homooligomerization [GO:0051260]	-	-	-	exon (XM_007986643.2, exon 13 of 15)	2.78714	-	-	0.000615498	-	-	-	-	-	-	-	-	DMR	-	-
ATOX1	-	-	-	-	-	-	-	-	-	-	-	-	-	-	-	-3.52491	-	-	2.47031e-08	-	-	DEG
ATP11C	A0A0D9R4T0	Phospholipid-transporting ATPase (EC 7.6.2.1)	endoplasmic reticulum [GO:0005783]; plasma membrane [GO:0005886]; recycling endosome [GO:0055037]; ATP binding [GO:0005524]; ATP hydrolysis activity [GO:0016887]; ATPase-coupled intramembrane lipid transporter activity [GO:0140326]; magnesium ion binding [GO:0000287]; phospholipid translocation [GO:0045332]; positive regulation of B cell differentiation [GO:0045579]; pre-B cell differentiation [G…	-	-	GO:0002520~immune system development;GO:0002682~regulation of immune system process;GO:0002376~immune system process;GO:0002684~positive regulation of immune system process	exon (XM_007992849.2, exon 10 of 30)	1.86964	-	-	0.0063078	-	-	-	-	-1.30536	-	-	0.0270451	DMR	-	DEG
ATP13A3	A0A0D9R929	ATPase 13A3	late endosome membrane [GO:0031902]; ATP binding [GO:0005524]; ATP hydrolysis activity [GO:0016887]; ATPase-coupled monoatomic cation transmembrane transporter activity [GO:0019829]; P-type ion transporter activity [GO:0015662]; polyamine transmembrane transporter activity [GO:0015203]; intracellular calcium ion homeostasis [GO:0006874]	-	-	-	exon (XM_008009563.2, exon 11 of 33)	1.13511	-	-	4.98531e-19	-	-	-	-	-	-	-	-	DMR	-	-
ATP13A3	A0A0D9R929	ATPase 13A3	late endosome membrane [GO:0031902]; ATP binding [GO:0005524]; ATP hydrolysis activity [GO:0016887]; ATPase-coupled monoatomic cation transmembrane transporter activity [GO:0019829]; P-type ion transporter activity [GO:0015662]; polyamine transmembrane transporter activity [GO:0015203]; intracellular calcium ion homeostasis [GO:0006874]	-	-	-	exon (XM_008009563.2, exon 33 of 33)	-	1.18497	-	-	2.23762e-05	-	-	-	-	-	-	-	-	DMR	-
ATP13A3	A0A0D9R929	ATPase 13A3	late endosome membrane [GO:0031902]; ATP binding [GO:0005524]; ATP hydrolysis activity [GO:0016887]; ATPase-coupled monoatomic cation transmembrane transporter activity [GO:0019829]; P-type ion transporter activity [GO:0015662]; polyamine transmembrane transporter activity [GO:0015203]; intracellular calcium ion homeostasis [GO:0006874]	-	-	-	exon (XM_008009563.2, exon 4 of 33)	1.19635	-	-	0.000110062	-	-	-	-	-	-	-	-	DMR	-	-
ATP1A1	A0A0D9S647	Sodium/potassium-transporting ATPase subunit alpha	apical plasma membrane [GO:0016324]; basolateral plasma membrane [GO:0016323]; lateral plasma membrane [GO:0016328]; organelle membrane [GO:0031090]; postsynaptic density [GO:0014069]; sodium:potassium-exchanging ATPase complex [GO:0005890]; sperm flagellum [GO:0036126]; T-tubule [GO:0030315]; ATP binding [GO:0005524]; ATP hydrolysis activity [GO:0016887]; metal ion binding [GO:0046872]; P-type s…	This is the catalytic component of the active enzyme, which catalyzes the hydrolysis of ATP coupled with the exchange of sodium and potassium ions across the plasma membrane. This action creates the electrochemical gradient of sodium and potassium ions, providing the energy for active transport of various nutrients. Could also be part of an osmosensory signaling pathway that senses body-fluid sod…	-	-	-	-	-	-	-	-	-	-	-	-2.15715	-	-	7.93304e-07	-	-	DEG
ATP1B1	A0A0D9RF94	Sodium/potassium-transporting ATPase subunit beta	apical plasma membrane [GO:0016324]; basolateral plasma membrane [GO:0016323]; intercalated disc [GO:0014704]; lateral plasma membrane [GO:0016328]; organelle membrane [GO:0031090]; sodium:potassium-exchanging ATPase complex [GO:0005890]; sperm flagellum [GO:0036126]; T-tubule [GO:0030315]; ATPase activator activity [GO:0001671]; ATPase binding [GO:0051117]; P-type sodium:potassium-exchanging tra…	Involved in cell adhesion and establishing epithelial cell polarity. {ECO:0000256|ARBA:ARBA00003825}.; This is the non-catalytic component of the active enzyme, which catalyzes the hydrolysis of ATP coupled with the exchange of Na(+) and K(+) ions across the plasma membrane. {ECO:0000256|RuleBase:RU362099}.	-	-	-	-	-	-	-	-	-	-	-	-2.61612	-	-	4.54194e-24	-	-	DEG
ATP1B3	A0A0D9RFQ9	Sodium/potassium-transporting ATPase subunit beta	apical plasma membrane [GO:0016324]; basolateral plasma membrane [GO:0016323]; cytoplasm [GO:0005737]; sodium:potassium-exchanging ATPase complex [GO:0005890]; sperm flagellum [GO:0036126]; ATPase activator activity [GO:0001671]; ATPase binding [GO:0051117]; protein-macromolecule adaptor activity [GO:0030674]; intracellular potassium ion homeostasis [GO:0030007]; intracellular sodium ion homeosta…	This is the non-catalytic component of the active enzyme, which catalyzes the hydrolysis of ATP coupled with the exchange of Na(+) and K(+) ions across the plasma membrane. The exact function of the beta-3 subunit is not known. {ECO:0000256|ARBA:ARBA00037667}.	-	-	-	-	-	-	-	-	-	-	-	-1.96252	-	-	6.45714e-06	-	-	DEG
ATP2B4	A0A0D9RPG9	Calcium-transporting ATPase (EC 7.2.2.10)	intracellular membrane-bounded organelle [GO:0043231]; membrane raft [GO:0045121]; sperm flagellum [GO:0036126]; T-tubule [GO:0030315]; Z disc [GO:0030018]; ATP binding [GO:0005524]; ATP hydrolysis activity [GO:0016887]; calmodulin binding [GO:0005516]; nitric-oxide synthase binding [GO:0050998]; nitric-oxide synthase inhibitor activity [GO:0036487]; P-type calcium transporter activity [GO:000538…	Catalyzes the hydrolysis of ATP coupled with the transport of calcium. {ECO:0000256|RuleBase:RU361146}.	-	-	exon (XM_007988869.2, exon 21 of 21)	1.6043	-	-	1.67009e-07	-	-	-	-	-	-	-	-	DMR	-	-
ATP5F1A	A0A0D9RZE8	ATP synthase subunit alpha	COP9 signalosome [GO:0008180]; mitochondrial inner membrane [GO:0005743]; plasma membrane [GO:0005886]; proton-transporting ATP synthase complex, catalytic core F(1) [GO:0045261]; ADP binding [GO:0043531]; angiostatin binding [GO:0043532]; ATP binding [GO:0005524]; MHC class I protein binding [GO:0042288]; proton-transporting ATP synthase activity, rotational mechanism [GO:0046933]; lipid metabol…	Produces ATP from ADP in the presence of a proton gradient across the membrane. {ECO:0000256|RuleBase:RU003551}.	-	-	-	-	-	-	-	-	-	-	-	-2.15363	-	-	8.7179e-08	-	-	DEG
ATP5F1B	A0A0D9QYB1	ATP synthase subunit beta (EC 7.1.2.2)	cell surface [GO:0009986]; mitochondrial membrane [GO:0031966]; mitochondrial nucleoid [GO:0042645]; plasma membrane [GO:0005886]; proton-transporting ATP synthase complex, catalytic core F(1) [GO:0045261]; angiostatin binding [GO:0043532]; ATP binding [GO:0005524]; ATP hydrolysis activity [GO:0016887]; MHC class I protein binding [GO:0042288]; proton-transporting ATP synthase activity, rotationa…	Mitochondrial membrane ATP synthase (F(1)F(0) ATP synthase or Complex V) produces ATP from ADP in the presence of a proton gradient across the membrane which is generated by electron transport complexes of the respiratory chain. F-type ATPases consist of two structural domains, F(1) - containing the extramembraneous catalytic core, and F(0) - containing the membrane proton channel, linked togethe…	-	-	-	-	-	-	-	-	-	-	-	-2.19216	-	-	2.40361e-06	-	-	DEG
ATP5F1D	A0A0D9RIK3	ATP synthase F1 subunit delta	mitochondrial inner membrane [GO:0005743]; proton-transporting ATP synthase complex, catalytic core F(1) [GO:0045261]; proton-transporting ATP synthase activity, rotational mechanism [GO:0046933]; mitochondrial proton-transporting ATP synthase complex assembly [GO:0033615]; proton motive force-driven mitochondrial ATP synthesis [GO:0042776]	Mitochondrial membrane ATP synthase (F(1)F(0) ATP synthase or Complex V) produces ATP from ADP in the presence of a proton gradient across the membrane which is generated by electron transport complexes of the respiratory chain. F-type ATPases consist of two structural domains, F(1) - containing the extramembraneous catalytic core, and F(0) - containing the membrane proton channel, linked togethe…	-	-	-	-	-	-	-	-	-	-	-	-2.91241	-	-	1.39496e-05	-	-	DEG
ATP5F1E	A0A0D9RSU6	ATP synthase F1 subunit epsilon	mitochondrial inner membrane [GO:0005743]; proton-transporting ATP synthase complex, catalytic core F(1) [GO:0045261]; proton-transporting ATP synthase activity, rotational mechanism [GO:0046933]; proton motive force-driven mitochondrial ATP synthesis [GO:0042776]	Mitochondrial membrane ATP synthase (F(1)F(0) ATP synthase or Complex V) produces ATP from ADP in the presence of a proton gradient across the membrane which is generated by electron transport complexes of the respiratory chain. F-type ATPases consist of two structural domains, F(1) - containing the extramembraneous catalytic core, and F(0) - containing the membrane proton channel, linked togethe…	-	-	-	-	-	-	-	-	-	-	-	-2.39096	-	-	1.18115e-11	-	-	DEG
ATP5IF1	-	-	-	-	-	-	-	-	-	-	-	-	-	-	-	-2.18036	-	-	4.01312e-15	-	-	DEG
ATP5MC1	A0A0D9S3V6	ATP synthase lipid-binding protein (ATPase protein 9) (ATPase subunit c)	mitochondrion [GO:0005739]; proton-transporting ATP synthase complex, coupling factor F(o) [GO:0045263]; lipid binding [GO:0008289]; proton transmembrane transporter activity [GO:0015078]; proton motive force-driven ATP synthesis [GO:0015986]	Mitochondrial membrane ATP synthase (F(1)F(0) ATP synthase or Complex V) produces ATP from ADP in the presence of a proton gradient across the membrane which is generated by electron transport complexes of the respiratory chain. F-type ATPases consist of two structural domains, F(1) - containing the extramembraneous catalytic core and F(0) - containing the membrane proton channel, linked together…	-	-	-	-	-	-	-	-	-	-	-	-2.02038	-	-	0.000126157	-	-	DEG
ATP5MC2	-	-	-	-	-	-	-	-	-	-	-	-	-	-	-	-1.79098	-	-	1.33671e-05	-	-	DEG
ATP5MC3	-	-	-	-	-	-	-	-	-	-	-	-	-	-	-	-2.00686	-	-	0.000622379	-	-	DEG
ATP5MF	-	-	-	-	-	-	-	-	-	-	-	-	-	-	-	-2.12543	-	-	0.0244981	-	-	DEG
ATP5MG	-	-	-	-	-	-	-	-	-	-	-	-	-	-	-	-1.52232	-	-	0.0424424	-	-	DEG
ATP5MJ	A0A0D9RBV4	ATP synthase membrane subunit j	membrane [GO:0016020]; mitochondrion [GO:0005739]	-	-	-	-	-	-	-	-	-	-	-	-	-1.86772	-	-	0.00239301	-	-	DEG
ATP5MK	A0A0D9QZ74	ATP synthase membrane subunit K, mitochondrial	mitochondrial membrane [GO:0031966]; proton-transporting ATP synthase complex [GO:0045259]	Mitochondrial membrane ATP synthase (F(1)F(0) ATP synthase or Complex V) produces ATP from ADP in the presence of a proton gradient across the membrane which is generated by electron transport complexes of the respiratory chain. F-type ATPases consist of two structural domains, F(1) - containing the extramembraneous catalytic core and F(0) - containing the membrane proton channel, linked together…	-	-	-	-	-	-	-	-	-	-	-	-2.18299	-	-	0.000247945	-	-	DEG
ATP5PD	-	-	-	-	-	-	-	-	-	-	-	-	-	-	-	-1.99436	-	-	7.61553e-06	-	-	DEG
ATP5PF	A0A0D9R9G2	ATP synthase-coupling factor 6, mitochondrial (ATPase subunit F6)	mitochondrial inner membrane [GO:0005743]; proton-transporting ATP synthase complex, coupling factor F(o) [GO:0045263]; proton-transporting ATP synthase activity, rotational mechanism [GO:0046933]; proton motive force-driven mitochondrial ATP synthesis [GO:0042776]	Mitochondrial membrane ATP synthase (F(1)F(0) ATP synthase or Complex V) produces ATP from ADP in the presence of a proton gradient across the membrane which is generated by electron transport complexes of the respiratory chain. F-type ATPases consist of two structural domains, F(1) - containing the extramembraneous catalytic core and F(0) - containing the membrane proton channel, linked together…	-	-	-	-	-	-	-	-	-	-	-	-2.03963	-	-	3.80722e-05	-	-	DEG
ATP5PO	-	-	-	-	-	-	-	-	-	-	-	-	-	-	-	-2.09755	-	-	3.17028e-07	-	-	DEG
ATP6AP1	A0A0D9RYR3	ATPase H+ transporting accessory protein 1	endosome membrane [GO:0010008]; presynapse [GO:0098793]; proton-transporting V-type ATPase complex [GO:0033176]; ATPase activator activity [GO:0001671]; small GTPase binding [GO:0031267]; transporter activator activity [GO:0141109]; cellular response to increased oxygen levels [GO:0036295]; endosome to plasma membrane protein transport [GO:0099638]; intracellular iron ion homeostasis [GO:0006879]…	-	-	-	-	-	-	-	-	-	-	-	-	-1.03526	-	-	0.0325966	-	-	DEG
ATP6AP2	A0A0D9RNF5	Renin receptor (ATPase H(+)-transporting lysosomal accessory protein 2) (ATPase H(+)-transporting lysosomal-interacting protein 2) (Renin/prorenin receptor)	autophagosome membrane [GO:0000421]; clathrin-coated vesicle membrane [GO:0030665]; dendritic spine membrane [GO:0032591]; endoplasmic reticulum membrane [GO:0005789]; endosome membrane [GO:0010008]; external side of plasma membrane [GO:0009897]; lysosomal membrane [GO:0005765]; synaptic vesicle membrane [GO:0030672]; vacuolar proton-transporting V-type ATPase complex [GO:0016471]; signaling rece…	Multifunctional protein which functions as a renin, prorenin cellular receptor and is involved in the assembly of the lysosomal proton-transporting V-type ATPase (V-ATPase) and the acidification of the endo-lysosomal system. May mediate renin-dependent cellular responses by activating ERK1 and ERK2. By increasing the catalytic efficiency of renin in AGT/angiotensinogen conversion to angiotensin I…	-	-	-	-	-	-	-	-	-	-	-	-2.35024	-	-	1.57194e-10	-	-	DEG
ATP6V0C	A0A0D9RDM9	V-type proton ATPase proteolipid subunit	clathrin-coated vesicle membrane [GO:0030665]; proton-transporting V-type ATPase, V0 domain [GO:0033179]; synaptic vesicle membrane [GO:0030672]; vacuolar membrane [GO:0005774]; proton-transporting ATPase activity, rotational mechanism [GO:0046961]; ubiquitin protein ligase binding [GO:0031625]; positive regulation of Wnt signaling pathway [GO:0030177]	Proton-conducting pore forming of the V0 complex of vacuolar(H+)-ATPase (V-ATPase), a multisubunit enzyme composed of a peripheral complex (V1) that hydrolyzes ATP and a membrane integral complex (V0) that translocates protons. V-ATPase is responsible for acidifying and maintaining the pH of intracellular compartments and in some cell types, is targeted to the plasma membrane, where it is respons…	-	-	-	-	-	-	-	-	-	-	-	-1.5304	-	-	0.0043503	-	-	DEG
ATP6V0E1	A0A0D9RB20	V-type proton ATPase subunit	proton-transporting V-type ATPase, V0 domain [GO:0033179]; proton-transporting ATPase activity, rotational mechanism [GO:0046961]	Subunit of the V0 complex of vacuolar(H+)-ATPase (V-ATPase), a multisubunit enzyme composed of a peripheral complex (V1) that hydrolyzes ATP and a membrane integral complex (V0) that translocates protons. V-ATPase is responsible for acidifying and maintaining the pH of intracellular compartments and in some cell types, is targeted to the plasma membrane, where it is responsible for acidifying the…	-	-	-	-	-	-	-	-	-	-	-	-1.20915	-	-	0.0321638	-	-	DEG
ATP6V1A	A0A0D9R392	V-type proton ATPase catalytic subunit A (EC 7.1.2.2) (V-ATPase 69 kDa subunit) (Vacuolar proton pump subunit alpha)	apical plasma membrane [GO:0016324]; clathrin-coated vesicle membrane [GO:0030665]; cytosol [GO:0005829]; lysosomal membrane [GO:0005765]; microvillus [GO:0005902]; nucleoplasm [GO:0005654]; presynapse [GO:0098793]; secretory granule [GO:0030141]; vacuolar proton-transporting V-type ATPase, V1 domain [GO:0000221]; ATP binding [GO:0005524]; ATP hydrolysis activity [GO:0016887]; proton-transporting…	Catalytic subunit of the V1 complex of vacuolar(H+)-ATPase (V-ATPase), a multisubunit enzyme composed of a peripheral complex (V1) that hydrolyzes ATP and a membrane integral complex (V0) that translocates protons. V-ATPase is responsible for acidifying and maintaining the pH of intracellular compartments and in some cell types, is targeted to the plasma membrane, where it is responsible for acid…	-	-	exon (XM_007985774.2, exon 14 of 15)	1.17622	-	-	3.49436e-13	-	-	-	-	-1.53975	-	-	5.54601e-09	DMR	-	DEG
ATP6V1D	-	-	-	-	-	-	-	-	-	-	-	-	-	-	-	-1.7467	-	-	0.00014598	-	-	DEG
ATP6V1F	A0A0D9RC77	V-type proton ATPase subunit F	presynapse [GO:0098793]; proton-transporting V-type ATPase, V1 domain [GO:0033180]; vacuolar proton-transporting V-type ATPase complex [GO:0016471]; proton-transporting ATPase activity, rotational mechanism [GO:0046961]; synaptic vesicle lumen acidification [GO:0097401]	Subunit of the V1 complex of vacuolar(H+)-ATPase (V-ATPase), a multisubunit enzyme composed of a peripheral complex (V1) that hydrolyzes ATP and a membrane integral complex (V0) that translocates protons. V-ATPase is responsible for acidifying and maintaining the pH of intracellular compartments. {ECO:0000256|PIRNR:PIRNR015945}.	-	-	-	-	-	-	-	-	-	-	-	-1.71509	-	-	0.00242271	-	-	DEG
ATP6V1G1	A0A0D9RKJ3	V-type proton ATPase subunit G	plasma membrane [GO:0005886]; synaptic vesicle membrane [GO:0030672]; vacuolar proton-transporting V-type ATPase, V1 domain [GO:0000221]; ATP hydrolysis activity [GO:0016887]; ATPase binding [GO:0051117]; proton-transporting ATPase activity, rotational mechanism [GO:0046961]; cellular response to increased oxygen levels [GO:0036295]; intracellular iron ion homeostasis [GO:0006879]; synaptic vesic…	Subunit of the V1 complex of vacuolar(H+)-ATPase (V-ATPase), a multisubunit enzyme composed of a peripheral complex (V1) that hydrolyzes ATP and a membrane integral complex (V0) that translocates protons. V-ATPase is responsible for acidifying and maintaining the pH of intracellular compartments and in some cell types, is targeted to the plasma membrane, where it is responsible for acidifying the…	-	-	exon (XM_007968295.2, exon 3 of 3)	-	1.43667	-	-	1.42848e-12	-	-	-	-1.24852	-	-	0.0105587	-	DMR	DEG
ATP9A	A0A0D9RRW5	Phospholipid-transporting ATPase (EC 7.6.2.1)	early endosome membrane [GO:0031901]; late endosome [GO:0005770]; perinuclear region of cytoplasm [GO:0048471]; plasma membrane [GO:0005886]; recycling endosome membrane [GO:0055038]; trans-Golgi network membrane [GO:0032588]; ATP binding [GO:0005524]; ATP hydrolysis activity [GO:0016887]; ATPase-coupled intramembrane lipid transporter activity [GO:0140326]; magnesium ion binding [GO:0000287]; pr…	-	-	-	-	-	-	-	-	-	-	-	-	1.11137	-	-	0.00330913	-	-	DEG
ATR	A0A0D9RFU3	Serine/threonine-protein kinase ATR (EC 2.7.11.1)	ATR-ATRIP complex [GO:0070310]; Golgi apparatus [GO:0005794]; nuclear envelope [GO:0005635]; PML body [GO:0016605]; site of DNA damage [GO:0090734]; 3-phosphoinositide-dependent protein kinase activity [GO:0004676]; AMP-activated protein kinase activity [GO:0004679]; ATP binding [GO:0005524]; DNA binding [GO:0003677]; DNA-dependent protein kinase activity [GO:0004677]; eukaryotic translation init…	-	-	-	exon (XM_008008852.2, exon 29 of 47)	1.16998	-	-	0.0156599	-	-	-	-	-	-	-	-	DMR	-	-
ATRAID	A0A0D9RBB1	All-trans retinoic acid induced differentiation factor	lysosomal membrane [GO:0005765]; nuclear envelope [GO:0005635]; perinuclear region of cytoplasm [GO:0048471]; xenobiotic transmembrane transporter activity [GO:0042910]; negative regulation of osteoblast proliferation [GO:0033689]; negative regulation of protein catabolic process [GO:0042177]; positive regulation of bone mineralization [GO:0030501]; positive regulation of osteoblast differentiati…	-	-	-	-	-	-	-	-	-	-	-	-	-1.89834	-	-	0.000411985	-	-	DEG
ATXN7L1	A0A0D9RG98	Ataxin 7 like 1	0	-	-	-	-	-	-	-	-	-	-	-	-	1.27685	-	-	0.0180411	-	-	DEG
ATXN7L3	A0A0D9S103	Ataxin-7-like protein 3 (SAGA-associated factor 11 homolog)	DUBm complex [GO:0071819]; SAGA complex [GO:0000124]; nuclear receptor coactivator activity [GO:0030374]; zinc ion binding [GO:0008270]; chromatin organization [GO:0006325]; regulation of transcription by RNA polymerase II [GO:0006357]	Component of the transcription regulatory histone acetylation (HAT) complex SAGA, a multiprotein complex that activates transcription by remodeling chromatin and mediating histone acetylation and deubiquitination. Within the SAGA complex, participates in a subcomplex that specifically deubiquitinates both histones H2A and H2B. The SAGA complex is recruited to specific gene promoters by activators…	-	-	exon (XM_008012436.2, exon 4 of 12)	-	-1.327	-	-	1.89493e-13	-	-	-	-	-	-	-	-	DMR	-
ATXN7L3	A0A0D9S103	Ataxin-7-like protein 3 (SAGA-associated factor 11 homolog)	DUBm complex [GO:0071819]; SAGA complex [GO:0000124]; nuclear receptor coactivator activity [GO:0030374]; zinc ion binding [GO:0008270]; chromatin organization [GO:0006325]; regulation of transcription by RNA polymerase II [GO:0006357]	Component of the transcription regulatory histone acetylation (HAT) complex SAGA, a multiprotein complex that activates transcription by remodeling chromatin and mediating histone acetylation and deubiquitination. Within the SAGA complex, participates in a subcomplex that specifically deubiquitinates both histones H2A and H2B. The SAGA complex is recruited to specific gene promoters by activators…	-	-	promoter-TSS (XM_008012436.2)	-	-1.00147	-	-	0.000908627	-	-	-	-	-	-	-	-	DMR	-
AURKA	A0A0D9RS62	non-specific serine/threonine protein kinase (EC 2.7.11.1) (Aurora/IPL1-related kinase 1) (Serine/threonine-protein kinase aurora-A)	axon hillock [GO:0043203]; ciliary basal body [GO:0036064]; cytosol [GO:0005829]; germinal vesicle [GO:0042585]; glutamatergic synapse [GO:0098978]; meiotic spindle [GO:0072687]; mitotic spindle pole [GO:0097431]; nucleoplasm [GO:0005654]; perinuclear region of cytoplasm [GO:0048471]; postsynaptic density [GO:0014069]; pronucleus [GO:0045120]; spindle microtubule [GO:0005876]; spindle pole centro…	-	-	-	-	-	-	-	-	-	-	-	-	-1.42197	-	-	0.0181247	-	-	DEG
AURKAIP1	A0A0D9S8Y1	Small ribosomal subunit protein mS38	mitochondrial matrix [GO:0005759]; nucleoplasm [GO:0005654]; positive regulation of proteolysis [GO:0045862]	-	-	-	-	-	-	-	-	-	-	-	-	-1.34394	-	-	0.00140844	-	-	DEG
AURKB	A0A0D9RE88	non-specific serine/threonine protein kinase (EC 2.7.11.1)	chromocenter [GO:0010369]; chromosome passenger complex [GO:0032133]; kinetochore [GO:0000776]; midbody [GO:0030496]; mitotic spindle midzone [GO:1990023]; mitotic spindle pole [GO:0097431]; nucleoplasm [GO:0005654]; 3-phosphoinositide-dependent protein kinase activity [GO:0004676]; AMP-activated protein kinase activity [GO:0004679]; ATP binding [GO:0005524]; DNA-dependent protein kinase activity…	-	-	-	-	-	-	-	-	-	-	-	-	-1.4176	-	-	0.00274429	-	-	DEG
AVIL	A0A0D9QX36	Advillin	actin filament [GO:0005884]; cytoplasm [GO:0005737]; focal adhesion [GO:0005925]; lamellipodium [GO:0030027]; actin filament binding [GO:0051015]; Arp2/3 complex binding [GO:0071933]; phosphatidylinositol-4,5-bisphosphate binding [GO:0005546]; actin filament severing [GO:0051014]; actin polymerization or depolymerization [GO:0008154]; barbed-end actin filament capping [GO:0051016]; cilium assembl…	-	-	-	-	-	-	-	-	-	-	-	-	2.87354	-	-	0.00098648	-	-	DEG
AVPR1B	A0A0D9RQV4	Vasopressin V1b receptor	Golgi apparatus [GO:0005794]; plasma membrane [GO:0005886]; peptide binding [GO:0042277]; vasopressin receptor activity [GO:0005000]; cellular response to hormone stimulus [GO:0032870]; phospholipase C-activating G protein-coupled receptor signaling pathway [GO:0007200]; positive regulation of arachidonate secretion [GO:0090238]; positive regulation of inositol phosphate biosynthetic process [GO:…	Receptor for arginine vasopressin. The activity of this receptor is mediated by G proteins which activate a phosphatidyl-inositol-calcium second messenger system. {ECO:0000256|RuleBase:RU046427}.	-	GO:0051701~biological process involved in interaction with host	-	-	-	-	-	-	-	-	-	2.8176	-	-	0.0142231	-	-	DEG
AXIN1	A0A0D9RK83	Axin-1 (Axis inhibition protein 1)	beta-catenin destruction complex [GO:0030877]; cell cortex [GO:0005938]; cytoplasmic vesicle [GO:0031410]; lateral plasma membrane [GO:0016328]; microtubule cytoskeleton [GO:0015630]; nucleolus [GO:0005730]; perinuclear region of cytoplasm [GO:0048471]; Wnt signalosome [GO:1990909]; beta-catenin binding [GO:0008013]; I-SMAD binding [GO:0070411]; p53 binding [GO:0002039]; protein domain specific b…	-	-	-	exon (XM_037990080.1, exon 8 of 9)	-1.22654	-	-	1.45225e-08	-	-	-	-	1.26582	-	-	0.0114049	DMR	-	DEG
AXIN1	A0A0D9RK83	Axin-1 (Axis inhibition protein 1)	beta-catenin destruction complex [GO:0030877]; cell cortex [GO:0005938]; cytoplasmic vesicle [GO:0031410]; lateral plasma membrane [GO:0016328]; microtubule cytoskeleton [GO:0015630]; nucleolus [GO:0005730]; perinuclear region of cytoplasm [GO:0048471]; Wnt signalosome [GO:1990909]; beta-catenin binding [GO:0008013]; I-SMAD binding [GO:0070411]; p53 binding [GO:0002039]; protein domain specific b…	-	-	-	exon (XM_037990080.1, exon 1 of 9)	-1.17802	-	-	2.03375e-22	-	-	-	-	1.26582	-	-	0.0114049	DMR	-	DEG
AXIN2	A0A0D9QVR2	Axin 2	beta-catenin destruction complex [GO:0030877]; centrosome [GO:0005813]; cytoplasm [GO:0005737]; nucleus [GO:0005634]; plasma membrane [GO:0005886]; beta-catenin binding [GO:0008013]; I-SMAD binding [GO:0070411]; molecular adaptor activity [GO:0060090]; protein kinase binding [GO:0019901]; ubiquitin protein ligase binding [GO:0031625]; aortic valve morphogenesis [GO:0003180]; bone mineralization […	-	-	-	-	-	-	-	-	-	-	-	-	2.025	-	-	0.00492973	-	-	DEG
AXL	A0A0D9S0W1	receptor protein-tyrosine kinase (EC 2.7.10.1)	actin cytoskeleton [GO:0015629]; cell surface [GO:0009986]; extracellular space [GO:0005615]; intracellular membrane-bounded organelle [GO:0043231]; plasma membrane [GO:0005886]; receptor complex [GO:0043235]; ATP binding [GO:0005524]; boss receptor activity [GO:0008288]; brain-derived neurotrophic factor receptor activity [GO:0060175]; epidermal growth factor receptor activity [GO:0005006]; fibr…	-	-	-	-	-	-	-	-	-	-	-	-	-1.65517	-	-	0.0128814	-	-	DEG
B2M	A0A0D9RB74	Beta-2-microglobulin	cytosol [GO:0005829]; external side of plasma membrane [GO:0009897]; extracellular region [GO:0005576]; Golgi apparatus [GO:0005794]; HFE-transferrin receptor complex [GO:1990712]; MHC class I peptide loading complex [GO:0042824]; MHC class I protein complex [GO:0042612]; protein homodimerization activity [GO:0042803]; structural molecule activity [GO:0005198]; amyloid fibril formation [GO:199000…	-	-	GO:0002682~regulation of immune system process;GO:0002376~immune system process;GO:0002684~positive regulation of immune system process;GO:0006955~immune response;GO:0002456~T cell mediated immunity;GO:0002705~positive regulation of leukocyte mediated immunity;GO:0002708~positive regulation of lymphocyte mediated immunity;GO:0002520~immune system development;GO:0002250~adaptive immune response;GO…	-	-	-	-	-	-	-	-	-	-3.05908	-	-	5.48322e-18	-	-	DEG
B3GALT6	A0A0D9S935	Hexosyltransferase (EC 2.4.1.-)	Golgi medial cisterna [GO:0005797]; Golgi membrane [GO:0000139]; galactosylxylosylprotein 3-beta-galactosyltransferase activity [GO:0047220]; glycosaminoglycan biosynthetic process [GO:0006024]; protein O-linked glycosylation [GO:0006493]; proteoglycan biosynthetic process [GO:0030166]	-	-	-	exon (XM_007981053.2, exon 1 of 1)	-1.3803	-	-	3.19865e-06	-	-	-	-	-	-	-	-	DMR	-	-
B3GAT3	A0A0D9R2S2	Galactosylgalactosylxylosylprotein 3-beta-glucuronosyltransferase (EC 2.4.1.135)	cis-Golgi network [GO:0005801]; Golgi membrane [GO:0000139]; galactosylgalactosylxylosylprotein 3-beta-glucuronosyltransferase activity [GO:0015018]; metal ion binding [GO:0046872]; protein phosphatase activator activity [GO:0072542]; carbohydrate metabolic process [GO:0005975]; chondroitin sulfate proteoglycan biosynthetic process [GO:0050650]; dermatan sulfate proteoglycan biosynthetic process …	-	-	-	exon (XM_007995472.2, exon 3 of 5)	-1.12135	-	-	0.00561715	-	-	-	-	-	-	-	-	DMR	-	-
B3GAT3	A0A0D9R2S2	Galactosylgalactosylxylosylprotein 3-beta-glucuronosyltransferase (EC 2.4.1.135)	cis-Golgi network [GO:0005801]; Golgi membrane [GO:0000139]; galactosylgalactosylxylosylprotein 3-beta-glucuronosyltransferase activity [GO:0015018]; metal ion binding [GO:0046872]; protein phosphatase activator activity [GO:0072542]; carbohydrate metabolic process [GO:0005975]; chondroitin sulfate proteoglycan biosynthetic process [GO:0050650]; dermatan sulfate proteoglycan biosynthetic process …	-	-	-	exon (XM_007995472.2, exon 4 of 5)	-1.20017	-	-	0.00983467	-	-	-	-	-	-	-	-	DMR	-	-
B3GLCT	A0A0D9RZC2	Beta 3-glucosyltransferase	endomembrane system [GO:0012505]; membrane [GO:0016020]; glycosyltransferase activity [GO:0016757]; brain development [GO:0007420]; camera-type eye development [GO:0043010]; cilium assembly [GO:0060271]; cranial skeletal system development [GO:1904888]; gene expression [GO:0010467]; limb development [GO:0060173]; protein secretion [GO:0009306]; roof of mouth development [GO:0060021]; skeletal sys…	-	-	-	-	-	-	-	-	-	-	-	-	-2.20846	-	-	1.50769e-05	-	-	DEG
B3GNT9	A0A0D9SAX4	Hexosyltransferase (EC 2.4.1.-)	Golgi membrane [GO:0000139]; hexosyltransferase activity [GO:0016758]; UDP-glycosyltransferase activity [GO:0008194]; poly-N-acetyllactosamine biosynthetic process [GO:0030311]; protein O-linked glycosylation [GO:0006493]	-	-	-	-	-	-	-	-	-	-	-	-	2.38598	-	-	0.0132506	-	-	DEG
B4GALT1	A0A0D9RC00	Beta-1,4-galactosyltransferase (Beta-1,4-GalTase) (EC 2.4.1.-)	basolateral plasma membrane [GO:0016323]; brush border membrane [GO:0031526]; desmosome [GO:0030057]; external side of plasma membrane [GO:0009897]; Golgi cisterna membrane [GO:0032580]; Golgi membrane [GO:0000139]; Golgi trans cisterna [GO:0000138]; protein-containing complex [GO:0032991]; beta-N-acetylglucosaminylglycopeptide beta-1,4-galactosyltransferase activity [GO:0003831]; cytoskeletal pr…	Responsible for the synthesis of complex-type N-linked oligosaccharides in many glycoproteins as well as the carbohydrate moieties of glycolipids. {ECO:0000256|RuleBase:RU368121}.	-	-	-	-	-	-	-	-	-	-	-	-1.65776	-	-	0.00963293	-	-	DEG
B4GALT4	A0A0D9R3V1	Beta-1,4-galactosyltransferase (Beta-1,4-GalTase) (EC 2.4.1.-)	Golgi cisterna membrane [GO:0032580]; Golgi membrane [GO:0000139]; metal ion binding [GO:0046872]; N-acetyllactosamine synthase activity [GO:0003945]; carbohydrate metabolic process [GO:0005975]; keratan sulfate biosynthetic process [GO:0018146]; lactosylceramide biosynthetic process [GO:0001572]; protein glycosylation [GO:0006486]	Responsible for the synthesis of complex-type N-linked oligosaccharides in many glycoproteins as well as the carbohydrate moieties of glycolipids. {ECO:0000256|RuleBase:RU368121}.	-	-	-	-	-	-	-	-	-	-	-	-1.03006	-	-	0.0198721	-	-	DEG
B4GAT1	A0A0D9R765	Beta-1,4-glucuronyltransferase 1 (I-beta-1,3-N-acetylglucosaminyltransferase) (N-acetyllactosaminide beta-1,3-N-acetylglucosaminyltransferase) (Poly-N-acetyllactosamine extension enzyme) (UDP-GlcNAc:betaGal beta-1,3-N-acetylglucosaminyltransferase 1)	Golgi membrane [GO:0000139]; glucuronosyltransferase activity [GO:0015020]; metal ion binding [GO:0046872]; axon guidance [GO:0007411]; protein O-linked mannosylation [GO:0035269]	-	-	-	exon (XM_007975766.2, exon 1 of 2)	-1.21348	-1.08112	-	0.00234496	0.000119887	-	-	-	-1.91985	-	-	0.0200148	DMR	DMR	DEG
BABAM2	A0A0D9RD11	BRISC and BRCA1-A complex member 2	BRCA1-A complex [GO:0070531]; BRISC complex [GO:0070552]; cytosol [GO:0005829]; nuclear ubiquitin ligase complex [GO:0000152]; polyubiquitin modification-dependent protein binding [GO:0031593]; tumor necrosis factor receptor binding [GO:0005164]; apoptotic process [GO:0006915]; cell division [GO:0051301]; cellular response to ionizing radiation [GO:0071479]; chromatin organization [GO:0006325]; d…	May play a role in homeostasis or cellular differentiation in cells of neural, epithelial and germline origins. May also act as a death receptor-associated anti-apoptotic protein, which inhibits the mitochondrial apoptotic pathway. {ECO:0000256|RuleBase:RU368019}.	-	-	-	-	-	-	-	-	-	-	-	-1.07063	-	-	0.0310303	-	-	DEG
BACH2	A0A0D9RXG9	BTB domain and CNC homolog 2	cytosol [GO:0005829]; nucleoplasm [GO:0005654]; RNA polymerase II transcription regulator complex [GO:0090575]; DNA-binding transcription repressor activity, RNA polymerase II-specific [GO:0001227]; RNA polymerase II cis-regulatory region sequence-specific DNA binding [GO:0000978]; import into nucleus [GO:0051170]; primary adaptive immune response involving T cells and B cells [GO:0090721]	-	-	GO:0002460~adaptive immune response based on somatic recombination of immune receptors built from immunoglobulin superfamily domains;GO:0002250~adaptive immune response	-	-	-	-	-	-	-	-	-	2.75148	-	-	7.81039e-05	-	-	DEG
BAD	A0A0D9R491	BCL2 associated agonist of cell death	BAD-BCL-2 complex [GO:0097138]; cytosol [GO:0005829]; mitochondrial outer membrane [GO:0005741]; cysteine-type endopeptidase activator activity involved in apoptotic process [GO:0008656]; phospholipid binding [GO:0005543]; protein kinase binding [GO:0019901]; protein phosphatase binding [GO:0019903]; ADP metabolic process [GO:0046031]; ATP metabolic process [GO:0046034]; cellular response to hypo…	-	-	GO:0002520~immune system development;GO:0002376~immune system process;GO:0002682~regulation of immune system process;GO:0002684~positive regulation of immune system process	exon (XM_007994027.2, exon 3 of 4)	-1.37341	-	-	2.75383e-06	-	-	-	-	-1.38179	-	-	0.0385949	DMR	-	DEG
BAD	A0A0D9R491	BCL2 associated agonist of cell death	BAD-BCL-2 complex [GO:0097138]; cytosol [GO:0005829]; mitochondrial outer membrane [GO:0005741]; cysteine-type endopeptidase activator activity involved in apoptotic process [GO:0008656]; phospholipid binding [GO:0005543]; protein kinase binding [GO:0019901]; protein phosphatase binding [GO:0019903]; ADP metabolic process [GO:0046031]; ATP metabolic process [GO:0046034]; cellular response to hypo…	-	-	GO:0002520~immune system development;GO:0002376~immune system process;GO:0002682~regulation of immune system process;GO:0002684~positive regulation of immune system process	TTS (XM_007994037.2)	-1.32636	-	-	2.94426e-07	-	-	-	-	-1.38179	-	-	0.0385949	DMR	-	DEG
BAG2	A0A0D9RLU6	BAG cochaperone 2	axon [GO:0030424]; dendritic microtubule [GO:1901588]; protein folding chaperone complex [GO:0101031]; adenyl-nucleotide exchange factor activity [GO:0000774]; heat shock protein binding [GO:0031072]; identical protein binding [GO:0042802]; protein-folding chaperone binding [GO:0051087]; tau protein binding [GO:0048156]; transmembrane transporter binding [GO:0044325]; ubiquitin protein ligase bin…	-	-	-	exon (XM_008013635.2, exon 3 of 3)	1.95229	-	-	9.29812e-08	-	-	-	-	-	-	-	-	DMR	-	-
BAG3	A0A0D9QXG8	BAG cochaperone 3	cytosol [GO:0005829]; membrane [GO:0016020]; nucleoplasm [GO:0005654]; protein folding chaperone complex [GO:0101031]; Z disc [GO:0030018]; adenyl-nucleotide exchange factor activity [GO:0000774]; protein-containing complex binding [GO:0044877]; protein-folding chaperone binding [GO:0051087]; cellular response to heat [GO:0034605]; cellular response to mechanical stimulus [GO:0071260]; cellular r…	-	-	-	-	-	-	-	-	-	-	-	-	4.24698	-	-	7.87801e-08	-	-	DEG
BAG6	-	-	-	-	-	-	-	-	-	-	-	-	-	-	-	-1.23489	-	-	0.0210602	-	-	DEG
BAHD1	A0A0D9R5B0	Bromo adjacent homology domain containing 1	chromatin silencing complex [GO:0005677]; nucleoplasm [GO:0005654]; chromatin binding [GO:0003682]; transcription cis-regulatory region binding [GO:0000976]; heterochromatin formation [GO:0031507]; negative regulation of DNA-templated transcription [GO:0045892]	-	-	-	promoter-TSS (XM_008017023.2)	-1.32282	-	-	2.19945e-05	-	-	-	-	1.58805	-	-	0.00137531	DMR	-	DEG
BAIAP2	A0A0D9S4E8	BAR/IMD domain-containing adapter protein 2 (Brain-specific angiogenesis inhibitor 1-associated protein 2)	actin cytoskeleton [GO:0015629]; cytosol [GO:0005829]; filopodium [GO:0030175]; neuron projection [GO:0043005]; nucleoplasm [GO:0005654]; plasma membrane [GO:0005886]; ruffle [GO:0001726]; Schaffer collateral - CA1 synapse [GO:0098685]; cytoskeletal anchor activity [GO:0008093]; identical protein binding [GO:0042802]; proline-rich region binding [GO:0070064]; actin crosslink formation [GO:0051764…	Adapter protein that links membrane-bound small G-proteins to cytoplasmic effector proteins. Necessary for CDC42-mediated reorganization of the actin cytoskeleton and for RAC1-mediated membrane ruffling. Involved in the regulation of the actin cytoskeleton by WASF family members and the Arp2/3 complex. Plays a role in neurite growth. Acts syngeristically with ENAH to promote filipodia formation. …	-	-	-	-	-	-	-	-	-	-	-	1.77362	-	-	8.79896e-05	-	-	DEG
BANF1	A0A0D9R6W3	Barrier-to-autointegration factor	chromatin [GO:0000785]; condensed chromosome [GO:0000793]; cytosol [GO:0005829]; nuclear envelope [GO:0005635]; nucleoplasm [GO:0005654]; double-stranded DNA binding [GO:0003690]; protein homodimerization activity [GO:0042803]; chromatin organization [GO:0006325]; chromosome organization [GO:0051276]; DNA integration [GO:0015074]; mitotic nuclear membrane reassembly [GO:0007084]; negative regulat…	-	-	GO:0045069~regulation of viral genome replication;GO:0019079~viral genome replication	-	-	-	-	-	-	-	-	-	-1.26715	-	-	0.0325106	-	-	DEG
BATF3	A0A0D9RSB1	Basic leucine zipper ATF-like transcription factor 3	cytosol [GO:0005829]; nucleolus [GO:0005730]; nucleoplasm [GO:0005654]; RNA polymerase II transcription regulator complex [GO:0090575]; DNA-binding transcription repressor activity, RNA polymerase II-specific [GO:0001227]; RNA polymerase II cis-regulatory region sequence-specific DNA binding [GO:0000978]; myeloid dendritic cell differentiation [GO:0043011]; response to virus [GO:0009615]	-	-	-	intron (XR_005236071.1, intron 4 of 4)	-1.05403	-	-	3.62181e-06	-	-	-	-	-	-	-	-	DMR	-	-
BAX	A0A0D9S330	BCL2 associated X, apoptosis regulator	BAK complex [GO:0097145]; BAX complex [GO:0097144]; cell periphery [GO:0071944]; cytosol [GO:0005829]; endoplasmic reticulum membrane [GO:0005789]; mitochondrial outer membrane [GO:0005741]; mitochondrial permeability transition pore complex [GO:0005757]; nuclear envelope [GO:0005635]; BH3 domain binding [GO:0051434]; channel activity [GO:0015267]; Hsp70 protein binding [GO:0030544]; lipid bindin…	-	-	-	-	-	-	-	-	-	-	-	-	-1.36746	-	-	0.0102867	-	-	DEG
BBC3	A0A0D9S2H2	BCL2 binding component 3	mitochondrion [GO:0005739]; cellular response to hypoxia [GO:0071456]; cellular response to ionizing radiation [GO:0071479]; determination of adult lifespan [GO:0008340]; execution phase of apoptosis [GO:0097194]; fibroblast apoptotic process [GO:0044346]; intrinsic apoptotic signaling pathway in response to DNA damage by p53 class mediator [GO:0042771]; intrinsic apoptotic signaling pathway in r…	-	-	-	exon (XM_007997337.2, exon 1 of 4)	-	-1.56525	-	-	0.00113389	-	-	-	-	-	-	-	-	DMR	-
BBS2	A0A0D9QYK6	Bardet-Biedl syndrome 2 protein homolog	BBSome [GO:0034464]; centriolar satellite [GO:0034451]; ciliary basal body [GO:0036064]; ciliary membrane [GO:0060170]; cytoplasm [GO:0005737]; microvillus [GO:0005902]; motile cilium [GO:0031514]; stereocilium [GO:0032420]; RNA polymerase II-specific DNA-binding transcription factor binding [GO:0061629]; adult behavior [GO:0030534]; artery smooth muscle contraction [GO:0014824]; brain morphogene…	-	-	-	-	-	-	-	-	-	-	-	-	-1.27082	-	-	0.0411508	-	-	DEG
BCAM	A0A0D9S1Q3	Basal cell adhesion molecule (Lutheran blood group)	cell surface [GO:0009986]; plasma membrane [GO:0005886]; laminin binding [GO:0043236]; laminin receptor activity [GO:0005055]; cell-matrix adhesion [GO:0007160]	-	-	-	exon (XM_007997149.2, exon 15 of 15)	-	1.11303	-	-	0.000360339	-	-	-	-3.61641	-	-	6.10586e-22	-	DMR	DEG
BCKDK	A0A0D9R0A5	Protein-serine/threonine kinase (EC 2.7.11.-)	mitochondrial matrix [GO:0005759]; ATP binding [GO:0005524]; protein serine/threonine phosphatase activity [GO:0004722]; pyruvate dehydrogenase (acetyl-transferring) kinase activity [GO:0004740]; lipid biosynthetic process [GO:0008610]; regulation of glucose metabolic process [GO:0010906]	-	-	-	-	-	-	-	-	-	-	-	-	-1.24705	-	-	0.00545408	-	-	DEG
BCL2	A0A0D9S017	Apoptosis regulator Bcl-2	BAD-BCL-2 complex [GO:0097138]; cytosol [GO:0005829]; endoplasmic reticulum membrane [GO:0005789]; mitochondrial outer membrane [GO:0005741]; myelin sheath [GO:0043209]; nuclear membrane [GO:0031965]; pore complex [GO:0046930]; BH3 domain binding [GO:0051434]; channel activity [GO:0015267]; channel inhibitor activity [GO:0016248]; DNA-binding transcription factor binding [GO:0140297]; identical p…	Suppresses apoptosis in a variety of cell systems including factor-dependent lymphohematopoietic and neural cells. Regulates cell death by controlling the mitochondrial membrane permeability. Appears to function in a feedback loop system with caspases. Inhibits caspase activity either by preventing the release of cytochrome c from the mitochondria and/or by binding to the apoptosis-activating fac…	-	GO:0050778~positive regulation of immune response;GO:0002253~activation of immune response;GO:0051607~defense response to virus;GO:0045069~regulation of viral genome replication;GO:0002764~immune response-regulating signaling pathway;GO:0009615~response to virus;GO:0002429~immune response-activating cell surface receptor signaling pathway;GO:0002757~immune response-activating signal transduction;…	-	-	-	-	-	-	-	-	-	-1.75482	-	-	0.0325966	-	-	DEG
BCL2L1	A0A0D9RJZ8	Bcl-2-like protein 1 (Apoptosis regulator Bcl-X)	Bcl-2 family protein complex [GO:0097136]; centrosome [GO:0005813]; cytosol [GO:0005829]; endoplasmic reticulum [GO:0005783]; mitochondrial matrix [GO:0005759]; mitochondrial outer membrane [GO:0005741]; nuclear membrane [GO:0031965]; synaptic vesicle membrane [GO:0030672]; BH3 domain binding [GO:0051434]; identical protein binding [GO:0042802]; protein kinase binding [GO:0019901]; apoptotic proc…	-	-	GO:0009615~response to virus;GO:0051607~defense response to virus	exon (XM_008020087.2, exon 3 of 3)	-	-1.12497	-	-	1.26659e-05	-	-	-	-	-	-	-	-	DMR	-
BCL3	A0A0D9S1P4	BCL3 transcription coactivator	Bcl3-Bcl10 complex [GO:0032996]; Bcl3/NF-kappaB2 complex [GO:0033257]; cytosol [GO:0005829]; midbody [GO:0030496]; nucleoplasm [GO:0005654]; plasma membrane [GO:0005886]; histone deacetylase binding [GO:0042826]; NF-kappaB binding [GO:0051059]; transcription coactivator activity [GO:0003713]; transcription corepressor activity [GO:0003714]; antimicrobial humoral response [GO:0019730]; canonical N…	-	-	-	-	-	-	-	-	-	-	-	-	-1.85047	-	-	0.00121671	-	-	DEG
BCL7C	A0A0D9R0I7	BAF chromatin remodeling complex subunit BCL7C	SWI/SNF complex [GO:0016514]	-	-	-	-	-	-	-	-	-	-	-	-	-2.00609	-	-	6.30877e-05	-	-	DEG
BCLAF3	A0A0D9RQ14	BCLAF1 and THRAP3 family member 3	mediator complex [GO:0016592]; DNA binding [GO:0003677]; transcription coregulator activity [GO:0003712]; positive regulation of transcription by RNA polymerase II [GO:0045944]	-	-	-	exon (XM_007991231.2, exon 5 of 12)	1.29595	-	-	0.0126314	-	-	-	-	-	-	-	-	DMR	-	-
BCLAF3	A0A0D9RQ14	BCLAF1 and THRAP3 family member 3	mediator complex [GO:0016592]; DNA binding [GO:0003677]; transcription coregulator activity [GO:0003712]; positive regulation of transcription by RNA polymerase II [GO:0045944]	-	-	-	exon (XM_007991231.2, exon 8 of 12)	1.00742	-	-	0.000427658	-	-	-	-	-	-	-	-	DMR	-	-
BCOR	A0A0D9RNG3	BCL6 corepressor	BCOR complex [GO:0140261]; nucleoplasm [GO:0005654]; DNA-binding transcription factor binding [GO:0140297]; heat shock protein binding [GO:0031072]; histone deacetylase binding [GO:0042826]; RNA polymerase II transcription regulatory region sequence-specific DNA binding [GO:0000977]; transcription corepressor activity [GO:0003714]; ubiquitin-protein transferase activity [GO:0004842]; blastocyst h…	-	-	-	exon (XM_007991407.2, exon 15 of 15)	-	1.22346	-	-	0.002786	-	-	-	-	-	-	-	-	DMR	-
BCOR	A0A0D9RNG3	BCL6 corepressor	BCOR complex [GO:0140261]; nucleoplasm [GO:0005654]; DNA-binding transcription factor binding [GO:0140297]; heat shock protein binding [GO:0031072]; histone deacetylase binding [GO:0042826]; RNA polymerase II transcription regulatory region sequence-specific DNA binding [GO:0000977]; transcription corepressor activity [GO:0003714]; ubiquitin-protein transferase activity [GO:0004842]; blastocyst h…	-	-	-	exon (XM_007991407.2, exon 4 of 15)	-1.23528	-	-	4.74354e-16	-	-	-	-	-	-	-	-	DMR	-	-
BCOR	A0A0D9RNG3	BCL6 corepressor	BCOR complex [GO:0140261]; nucleoplasm [GO:0005654]; DNA-binding transcription factor binding [GO:0140297]; heat shock protein binding [GO:0031072]; histone deacetylase binding [GO:0042826]; RNA polymerase II transcription regulatory region sequence-specific DNA binding [GO:0000977]; transcription corepressor activity [GO:0003714]; ubiquitin-protein transferase activity [GO:0004842]; blastocyst h…	-	-	-	exon (XM_007991413.2, exon 1 of 15)	-	1.33807	-	-	0.00591415	-	-	-	-	-	-	-	-	DMR	-
BCORL1	A0A0D9R6N9	BCL6 corepressor like 1	nucleoplasm [GO:0005654]; plasma membrane [GO:0005886]; transcription corepressor activity [GO:0003714]; negative regulation of transcription by RNA polymerase II [GO:0000122]	-	-	-	exon (XM_007992663.2, exon 4 of 14)	-	1.35081	-	-	2.91368e-05	-	-	-	-	-	-	-	-	DMR	-
BDH2	A0A0D9QVK4	Dehydrogenase/reductase SDR family member 6 (EC 1.1.1.104) (EC 1.1.1.30) ((R)-beta-hydroxybutyrate dehydrogenase) (3-hydroxybutyrate dehydrogenase type 2) (4-oxo-L-proline reductase) (Oxidoreductase UCPA) (Short chain dehydrogenase/reductase family 15C member 1)	cytosol [GO:0005829]; 3-hydroxybutyrate dehydrogenase activity [GO:0003858]; NAD binding [GO:0051287]; epithelial cell differentiation [GO:0030855]; fatty acid beta-oxidation [GO:0006635]; siderophore biosynthetic process [GO:0019290]	-	-	-	-	-	-	-	-	-	-	-	-	-2.2156	-	-	2.61802e-06	-	-	DEG
BDNF	A0A0D9SD87	Brain-derived neurotrophic factor (proBDNF)	axon [GO:0030424]; dendrite [GO:0030425]; extracellular space [GO:0005615]; synaptic vesicle [GO:0008021]; growth factor activity [GO:0008083]; nerve growth factor receptor binding [GO:0005163]; cell surface receptor protein tyrosine kinase signaling pathway [GO:0007169]; collateral sprouting [GO:0048668]; modulation of chemical synaptic transmission [GO:0050804]; negative regulation of neuron ap…	During development, promotes the survival and differentiation of selected neuronal populations of the peripheral and central nervous systems. Participates in axonal growth, pathfinding and in the modulation of dendritic growth and morphology. Major regulator of synaptic transmission and plasticity at adult synapses in many regions of the CNS. {ECO:0000256|RuleBase:RU364086}.; Important signaling …	-	-	exon (XM_008003703.2, exon 2 of 2)	1.13378	-1.71714	-	1.29251e-08	1.81103e-10	-	-	-	-	-	-	-	DMR	DMR	-
BEGAIN	A0A0D9RD67	Brain enriched guanylate kinase associated	membrane [GO:0016020]; synapse [GO:0045202]	-	-	-	-	-	-	-	-	-	-	-	-	2.82385	-	-	0.033367	-	-	DEG
BEND5	A0A0D9S7B9	BEN domain containing 5	Golgi apparatus [GO:0005794]; DNA binding [GO:0003677]; negative regulation of DNA-templated transcription [GO:0045892]	-	-	-	intron (XM_038003780.1, intron 3 of 4)	-	-2.36205	-	-	0.00171788	-	-	-	-	-	-	-	-	DMR	-
BEX1	A0A0D9RB04	Brain expressed X-linked 1	cytoplasm [GO:0005737]; nucleus [GO:0005634]; transcription regulator complex [GO:0005667]; RNA polymerase II-specific DNA-binding transcription factor binding [GO:0061629]; signaling receptor binding [GO:0005102]; positive regulation of transcription by RNA polymerase II [GO:0045944]; signal transduction [GO:0007165]	-	-	-	-	-	-	-	-	-	-	-	-	-2.35557	-	-	3.34847e-06	-	-	DEG
BEX3	A0A0D9RAT3	Brain expressed X-linked 3	cytosol [GO:0005829]; death receptor binding [GO:0005123]; identical protein binding [GO:0042802]; molecular function inhibitor activity [GO:0140678]; extrinsic apoptotic signaling pathway via death domain receptors [GO:0008625]; negative regulation of protein ubiquitination [GO:0031397]	-	-	-	-	-	-	-	-	-	-	-	-	-2.08894	-	-	6.4038e-09	-	-	DEG
BHLHB9	-	-	-	-	-	-	-	-	-	-	-	-	-	-	-	3.23318	-	-	9.81459e-15	-	-	DEG
BHLHE40	A0A0D9RET7	Basic helix-loop-helix family member e40	cytoplasm [GO:0005737]; nuclear body [GO:0016604]; DNA-binding transcription repressor activity, RNA polymerase II-specific [GO:0001227]; E-box binding [GO:0070888]; MRF binding [GO:0043426]; protein domain specific binding [GO:0019904]; protein heterodimerization activity [GO:0046982]; protein homodimerization activity [GO:0042803]; RNA polymerase II-specific DNA-binding transcription factor bin…	-	-	-	exon (XM_007985061.2, exon 1 of 5)	-	-1.41029	-	-	2.45265e-19	-	-	-	-	-	-	-	-	DMR	-
BICC1	A0A0D9R4M7	BicC family RNA binding protein 1	cytoplasm [GO:0005737]; RNA binding [GO:0003723]; determination of left/right symmetry [GO:0007368]; heart development [GO:0007507]; kidney development [GO:0001822]; negative regulation of canonical Wnt signaling pathway [GO:0090090]	-	-	-	-	-	-	-	-	-	-	-	-	-2.09683	-	-	7.20517e-22	-	-	DEG
BICD1	A0A0D9R4X8	BICD cargo adaptor 1	centrosome [GO:0005813]; cytoplasmic microtubule [GO:0005881]; cytosol [GO:0005829]; membrane [GO:0016020]; perinuclear region of cytoplasm [GO:0048471]; secretory vesicle [GO:0099503]; trans-Golgi network [GO:0005802]; cytoskeletal anchor activity [GO:0008093]; dynactin binding [GO:0034452]; dynein complex binding [GO:0070840]; dynein intermediate chain binding [GO:0045505]; protein kinase bindi…	-	-	GO:0016032~viral process	-	-	-	-	-	-	-	-	-	1.15007	-	-	0.0280989	-	-	DEG
BIN1	A0A0D9RW81	Bridging integrator 1	axon [GO:0030424]; cytoskeleton [GO:0005856]; cytosol [GO:0005829]; dendrite [GO:0030425]; glutamatergic synapse [GO:0098978]; lipid tube [GO:0060987]; nuclear envelope [GO:0005635]; postsynapse [GO:0098794]; RNA polymerase II transcription repressor complex [GO:0090571]; synaptic vesicle [GO:0008021]; T-tubule [GO:0030315]; actin filament binding [GO:0051015]; aspartic-type endopeptidase inhibit…	-	-	-	-	-	-	-	-	-	-	-	-	-1.47268	-	-	0.0185396	-	-	DEG
BIRC5	-	-	-	-	-	-	-	-	-	-	-	-	-	-	-	-2.12823	-	-	9.56854e-12	-	-	DEG
BIVM	A0A0D9RY21	Basic, immunoglobulin-like variable motif containing	nucleus [GO:0005634]; DNA endonuclease activity [GO:0004520]; single-stranded DNA binding [GO:0003697]	-	-	-	promoter-TSS (XM_007960833.2)	-	-1.01554	-	-	1.62017e-20	-	-	-	-2.0376	-	-	1.48773e-12	-	DMR	DEG
BLMH	A0A0D9R3B0	Bleomycin hydrolase (EC 3.4.22.40)	cytoplasm [GO:0005737]; cysteine-type aminopeptidase activity [GO:0070005]; cysteine-type endopeptidase activity [GO:0004197]; identical protein binding [GO:0042802]; homocysteine catabolic process [GO:0043418]; proteolysis [GO:0006508]; response to toxic substance [GO:0009636]; response to xenobiotic stimulus [GO:0009410]	-	-	-	-	-	-	-	-	-	-	-	-	-1.10855	-	-	0.00563317	-	-	DEG
BLOC1S1	-	-	-	-	-	-	-	-	-	-	-	-	-	-	-	-2.27015	-	-	8.06289e-05	-	-	DEG
BLOC1S2	A0A0D9R009	Biogenesis of lysosomal organelles complex 1 subunit 2	axon cytoplasm [GO:1904115]; BLOC-1 complex [GO:0031083]; BORC complex [GO:0099078]; cytosol [GO:0005829]; gamma-tubulin complex [GO:0000930]; mitochondrion [GO:0005739]; gamma-tubulin binding [GO:0043015]; anterograde synaptic vesicle transport [GO:0048490]; endosomal transport [GO:0016197]; extrinsic apoptotic signaling pathway via death domain receptors [GO:0008625]; lysosome localization [GO:…	-	-	-	-	-	-	-	-	-	-	-	-	1.44566	-	-	0.00507106	-	-	DEG
BLVRA	A0A0D9RSE1	Biliverdin reductase A (BVR A) (EC 1.3.1.24)	cytosol [GO:0005829]; biliberdin reductase (NAD+) activity [GO:0106276]; biliverdin reductase (NADP+) activity [GO:0106277]; nucleotide binding [GO:0000166]; zinc ion binding [GO:0008270]; heme catabolic process [GO:0042167]	Reduces the gamma-methene bridge of the open tetrapyrrole, biliverdin IXalpha, to bilirubin with the concomitant oxidation of a NADH or NADPH cofactor. Does not reduce bilirubin IXbeta. Uses the reactants NADH or NADPH depending on the pH; NADH is used at the acidic pH range (6-6.9) and NADPH at the alkaline range (8.5-8.7). NADPH, however, is the probable reactant in biological systems. {ECO:000…	-	-	promoter-TSS (XM_007981499.2)	1.31177	-	-	5.07263e-25	-	-	-	-	-2.00061	-	-	0.000510821	DMR	-	DEG
BLVRB	A0A0D9QUQ4	Biliverdin reductase B	cytosol [GO:0005829]; nucleoplasm [GO:0005654]; plasma membrane [GO:0005886]; biliverdin reductase [NAD(P)+] activity [GO:0004074]; peptidyl-cysteine S-nitrosylase activity [GO:0035605]; riboflavin reductase (NADPH) activity [GO:0042602]; heme catabolic process [GO:0042167]; megakaryocyte differentiation [GO:0030219]; negative regulation of insulin receptor signaling pathway [GO:0046627]	-	-	-	-	-	-	-	-	-	-	-	-	-1.60974	-	-	0.00278158	-	-	DEG
BLZF1	A0A0D9RFA2	Basic leucine zipper nuclear factor 1	Golgi membrane [GO:0000139]; nucleoplasm [GO:0005654]; ubiquitin protein ligase binding [GO:0031625]; Golgi organization [GO:0007030]; Golgi to plasma membrane protein transport [GO:0043001]	-	-	-	promoter-TSS (XM_007989601.2)	1.202	-	-	5.91616e-10	-	-	-	-	-	-	-	-	DMR	-	-
BMF	A0A0D9R4R5	Bcl2 modifying factor	myosin complex [GO:0016459]; anoikis [GO:0043276]; cellular response to UV [GO:0034644]; negative regulation of autophagy [GO:0010507]; positive regulation of apoptotic process [GO:0043065]	-	-	-	exon (XM_008017071.2, exon 6 of 6)	-	-1.031	-	-	0.00806506	-	-	-2.14086	-2.37914	-	3.9419e-06	0.000166761	-	DMEG	DEG
BMP2	A0A0D9RM38	Bone morphogenetic protein 2	BMP receptor complex [GO:0070724]; cell surface [GO:0009986]; extracellular space [GO:0005615]; intracellular membrane-bounded organelle [GO:0043231]; BMP receptor binding [GO:0070700]; co-receptor binding [GO:0039706]; cytokine activity [GO:0005125]; growth factor activity [GO:0008083]; phosphatase activator activity [GO:0019211]; protein serine/threonine kinase activator activity [GO:0043539]; …	-	-	-	exon (XM_008018529.2, exon 1 of 3)	-	2.14211	-	-	6.17097e-05	-	-	-	-	-	-	-	-	DMR	-
BMP4	A0A0D9RQR1	Bone morphogenetic protein 4	extracellular space [GO:0005615]; BMP receptor binding [GO:0070700]; chemoattractant activity [GO:0042056]; co-receptor binding [GO:0039706]; cytokine activity [GO:0005125]; growth factor activity [GO:0008083]; heparin binding [GO:0008201]; ameloblast differentiation [GO:0036305]; anterior/posterior axis specification [GO:0009948]; aortic valve morphogenesis [GO:0003180]; blood vessel endothelial…	-	-	GO:0002683~negative regulation of immune system process;GO:0002520~immune system development;GO:0002682~regulation of immune system process;GO:0002376~immune system process	exon (XM_007986722.2, exon 4 of 4)	1.6538	-	-	0.0234122	-	-	-	-	-	-	-	-	DMR	-	-
BMPR2	A0A0D9RDM2	receptor protein serine/threonine kinase (EC 2.7.11.30)	adherens junction [GO:0005912]; axon [GO:0030424]; caveola [GO:0005901]; cell body [GO:0044297]; cell surface [GO:0009986]; clathrin-coated pit [GO:0005905]; dendrite [GO:0030425]; nucleoplasm [GO:0005654]; postsynaptic density [GO:0014069]; receptor complex [GO:0043235]; activin receptor activity, type I [GO:0016361]; activin receptor activity, type II [GO:0016362]; ATP binding [GO:0005524]; BMP…	-	-	-	exon (XM_007965886.2, exon 13 of 13)	-	1.54861	-	-	1.37476e-11	-	-	-	-	-	-	-	-	DMR	-
BNIP2	A0A0D9RI03	BCL2 interacting protein 2	cytosol [GO:0005829]; nuclear envelope [GO:0005635]; nucleolus [GO:0005730]; apoptotic process [GO:0006915]	-	-	-	exon (XM_008016398.2, exon 10 of 10)	1.02607	-	-	0.000359779	-	-	-	-	-	-	-	-	DMR	-	-
BNIP3	A0A0D9QWK3	BCL2 interacting protein 3	endoplasmic reticulum membrane [GO:0005789]; mitochondrial outer membrane [GO:0005741]; nuclear envelope [GO:0005635]; postsynaptic density [GO:0014069]; endoplasmic reticulum-autophagosome adaptor activity [GO:0140506]; GTPase binding [GO:0051020]; mitochondrion autophagosome adaptor activity [GO:0140580]; protein homodimerization activity [GO:0042803]; brown fat cell differentiation [GO:0050873…	-	-	GO:0051607~defense response to virus;GO:0009615~response to virus	exon (XM_007964452.2, exon 7 of 7)	1.7879	-	-	1.53283e-09	-	-	-	-	-	-	-	-	DMR	-	-
BNIP3L	A0A0D9RU41	BCL2 interacting protein 3 like	endoplasmic reticulum [GO:0005783]; mitochondrial outer membrane [GO:0005741]; nuclear envelope [GO:0005635]; nuclear speck [GO:0016607]; lamin binding [GO:0005521]; protein homodimerization activity [GO:0042803]; cellular response to hypoxia [GO:0071456]; defense response to virus [GO:0051607]; mitochondrial outer membrane permeabilization [GO:0097345]; mitochondrial protein catabolic process [G…	-	-	GO:0009615~response to virus	exon (XM_007961972.2, exon 6 of 6)	-	1.13513	-	-	6.76789e-08	-	-	-	-	-	-	-	-	DMR	-
BNIPL	A0A0D9RZJ2	BCL2 interacting protein like	cytosol [GO:0005829]; nucleus [GO:0005634]; identical protein binding [GO:0042802]; apoptotic process [GO:0006915]; negative regulation of cell population proliferation [GO:0008285]; regulation of growth rate [GO:0040009]	-	-	-	-	-	-	-	-	-	-	-	-	2.23302	-	-	0.00134825	-	-	DEG
BOD1	-	-	-	-	-	-	TTS (XM_008015320.2)	-1.14455	-	-	3.70847e-13	-	-	-	-	-	-	-	-	DMR	-	-
BOLA3	A0A0D9RSL9	BolA family member 3	iron-sulfur cluster assembly complex [GO:1990229]; mitochondrial matrix [GO:0005759]; nuclear body [GO:0016604]; protein maturation by [4Fe-4S] cluster transfer [GO:0106035]	-	-	-	-	-	-	-	-	-	-	-	-	-1.81785	-	-	0.0107117	-	-	DEG
BORCS6	A0A0D9S9A1	BLOC-1 related complex subunit 6	BORC complex [GO:0099078]; identical protein binding [GO:0042802]; lysosome localization [GO:0032418]	-	-	-	exon (XM_008010268.2, exon 1 of 1)	-1.54406	-	-	0.000274031	-	-	-	-	-	-	-	-	DMR	-	-
BPGM	A0A0D9RA10	Phosphoglycerate mutase (EC 5.4.2.11) (EC 5.4.2.4)	2,3-bisphosphoglycerate-dependent phosphoglycerate mutase activity [GO:0046538]; bisphosphoglycerate mutase activity [GO:0004082]; hydrolase activity [GO:0016787]; cellular response to stress [GO:0033554]; defense response to protozoan [GO:0042832]; erythrocyte development [GO:0048821]; establishment of blood-brain barrier [GO:0060856]; glycolytic process [GO:0006096]; neuroinflammatory response …	-	-	-	-	-	-	-	-	-	-	-	-	-1.85767	-	-	0.00375241	-	-	DEG
BPNT2	A0A0D9RPY1	Golgi-resident adenosine 3',5'-bisphosphate 3'-phosphatase (EC 3.1.3.7) (3'(2'), 5'-bisphosphate nucleotidase 2) (Inositol monophosphatase domain-containing protein 1) (Myo-inositol monophosphatase A3) (Phosphoadenosine phosphate 3'-nucleotidase)	cytosol [GO:0005829]; nuclear body [GO:0016604]; trans-Golgi network membrane [GO:0032588]; 3',5'-nucleotide bisphosphate phosphatase activity [GO:0097657]; 3'-nucleotidase activity [GO:0008254]; metal ion binding [GO:0046872]; chondrocyte development [GO:0002063]; chondroitin sulfate metabolic process [GO:0030204]; embryonic digit morphogenesis [GO:0042733]; endochondral ossification [GO:0001958…	Exhibits 3'-nucleotidase activity toward adenosine 3',5'-bisphosphate (PAP), namely hydrolyzes adenosine 3',5'-bisphosphate into adenosine 5'-monophosphate (AMP) and a phosphate. May play a role in the formation of skeletal elements derived through endochondral ossification, possibly by clearing adenosine 3',5'-bisphosphate produced by Golgi sulfotransferases during glycosaminoglycan sulfation. H…	-	-	exon (XM_008000697.2, exon 5 of 5)	-	1.02542	-	-	0.000363772	-	-	-	-1.15566	-	-	0.000781713	-	DMR	DEG
BRD1	A0A0D9QYK2	Bromodomain containing 1	histone H3-K14 acetyltransferase complex [GO:0036409]; MOZ/MORF histone acetyltransferase complex [GO:0070776]; nuclear speck [GO:0016607]; histone binding [GO:0042393]; histone H3K14 acetyltransferase activity [GO:0036408]; histone H4K12 acetyltransferase activity [GO:0043997]; histone H4K5 acetyltransferase activity [GO:0043995]; histone H4K8 acetyltransferase activity [GO:0043996]; histone rea…	-	-	-	-	-	-	-	-	-	-	-	-	1.26465	-	-	0.00901409	-	-	DEG
BRD3OS	-	-	-	-	-	-	promoter-TSS (XR_005236615.1)	1.16116	-	-	0.000663196	-	-	-	-	-1.34369	-	-	0.0149673	DMR	-	DEG
BRD3OS	-	-	-	-	-	-	exon (XM_037986992.1, exon 3 of 3)	-1.01382	-	-	9.90366e-08	-	-	-	-	-1.34369	-	-	0.0149673	DMR	-	DEG
BRD7	A0A0D9QZ78	Bromodomain containing 7	cytosol [GO:0005829]; nucleoplasm [GO:0005654]; lysine-acetylated histone binding [GO:0070577]; p53 binding [GO:0002039]; transcription cis-regulatory region binding [GO:0000976]; transcription coactivator activity [GO:0003713]; transcription corepressor activity [GO:0003714]; negative regulation of G1/S transition of mitotic cell cycle [GO:2000134]; regulation of transcription by RNA polymerase …	-	-	-	-	-	-	-	-	-	-	-	-	-1.00498	-	-	0.00558959	-	-	DEG
BRF1	A0A0D9RAZ4	B-related factor 1	nucleus [GO:0005634]; transcription factor TFIIIB complex [GO:0000126]; transcription preinitiation complex [GO:0097550]; RNA polymerase III general transcription initiation factor activity [GO:0000995]; RNA polymerase III type 3 promoter sequence-specific DNA binding [GO:0001006]; TBP-class protein binding [GO:0017025]; transcription preinitiation complex assembly [GO:0070897]	-	-	-	exon (XM_007988038.2, exon 10 of 18)	-1.2273	-	-	2.19382e-06	-	-	-	-	-	-	-	-	DMR	-	-
BRF1	A0A0D9RAZ4	B-related factor 1	nucleus [GO:0005634]; transcription factor TFIIIB complex [GO:0000126]; transcription preinitiation complex [GO:0097550]; RNA polymerase III general transcription initiation factor activity [GO:0000995]; RNA polymerase III type 3 promoter sequence-specific DNA binding [GO:0001006]; TBP-class protein binding [GO:0017025]; transcription preinitiation complex assembly [GO:0070897]	-	-	-	exon (XM_007988038.2, exon 11 of 18)	-2.00542	-	-	8.07182e-09	-	-	-	-	-	-	-	-	DMR	-	-
BRF1	A0A0D9RAZ4	B-related factor 1	nucleus [GO:0005634]; transcription factor TFIIIB complex [GO:0000126]; transcription preinitiation complex [GO:0097550]; RNA polymerase III general transcription initiation factor activity [GO:0000995]; RNA polymerase III type 3 promoter sequence-specific DNA binding [GO:0001006]; TBP-class protein binding [GO:0017025]; transcription preinitiation complex assembly [GO:0070897]	-	-	-	exon (XM_007988038.2, exon 17 of 18)	-1.28064	-	-	1.14021e-12	-	-	-	-	-	-	-	-	DMR	-	-
BRF1	A0A0D9RAZ4	B-related factor 1	nucleus [GO:0005634]; transcription factor TFIIIB complex [GO:0000126]; transcription preinitiation complex [GO:0097550]; RNA polymerase III general transcription initiation factor activity [GO:0000995]; RNA polymerase III type 3 promoter sequence-specific DNA binding [GO:0001006]; TBP-class protein binding [GO:0017025]; transcription preinitiation complex assembly [GO:0070897]	-	-	-	exon (XM_007988038.2, exon 18 of 18)	-1.16086	-	-	0.0080962	-	-	-	-	-	-	-	-	DMR	-	-
BRF2	A0A0D9RSN2	Transcription factor IIIB 50 kDa subunit (B-related factor 2)	nucleus [GO:0005634]; transcription factor TFIIIB complex [GO:0000126]; transcription preinitiation complex [GO:0097550]; RNA polymerase III type 3 promoter sequence-specific DNA binding [GO:0001006]; TBP-class protein binding [GO:0017025]; cellular response to oxidative stress [GO:0034599]; regulation of transcription by RNA polymerase III [GO:0006359]; transcription preinitiation complex assemb…	General activator of RNA polymerase III transcription. Factor exclusively required for RNA polymerase III transcription of genes with promoter elements upstream of the initiation sites. Contributes to the regulation of gene expression; functions as activator in the absence of oxidative stress. Down-regulates expression of target genes in response to oxidative stress. Overexpression protects cells…	-	-	-	-	-	-	-	-	-	-	-	1.728	-	-	0.00127154	-	-	DEG
BRICD5	A0A0D9REP6	BRICHOS domain containing 5	membrane [GO:0016020]	-	-	-	TTS (XM_007982422.2)	-1.35216	-	-	0.000548407	-	-	-	-	-	-	-	-	DMR	-	-
BRINP1	A0A0D9RL29	BMP/retinoic acid-inducible neural-specific protein 1	cytoplasm [GO:0005737]; dendrite [GO:0030425]; glutamatergic synapse [GO:0098978]; neuronal cell body [GO:0043025]; behavioral fear response [GO:0001662]; brain development [GO:0007420]; cell population proliferation [GO:0008283]; cellular response to retinoic acid [GO:0071300]; central nervous system neuron development [GO:0021954]; exploration behavior [GO:0035640]; gene expression [GO:0010467]…	-	-	-	exon (XM_007968244.2, exon 8 of 8)	1.54587	-	-	0.00564997	-	-	-	-	-	-	-	-	DMR	-	-
BRIP1	A0A0D9R0T4	BRCA1 interacting helicase 1	BRCA1-B complex [GO:0070532]; cytoplasm [GO:0005737]; nuclear membrane [GO:0031965]; nucleoplasm [GO:0005654]; replication fork [GO:0005657]; 5'-3' DNA helicase activity [GO:0043139]; ATP binding [GO:0005524]; DNA binding [GO:0003677]; hydrolase activity, acting on acid anhydrides, in phosphorus-containing anhydrides [GO:0016818]; iron-sulfur cluster binding [GO:0051536]; isomerase activity [GO:0…	-	-	-	exon (XM_008011223.2, exon 9 of 20)	2.12598	-	-	0.00518042	-	-	-	-	-	-	-	-	DMR	-	-
BRIP1	A0A0D9R0T4	BRCA1 interacting helicase 1	BRCA1-B complex [GO:0070532]; cytoplasm [GO:0005737]; nuclear membrane [GO:0031965]; nucleoplasm [GO:0005654]; replication fork [GO:0005657]; 5'-3' DNA helicase activity [GO:0043139]; ATP binding [GO:0005524]; DNA binding [GO:0003677]; hydrolase activity, acting on acid anhydrides, in phosphorus-containing anhydrides [GO:0016818]; iron-sulfur cluster binding [GO:0051536]; isomerase activity [GO:0…	-	-	-	intron (XM_037993751.1, intron 5 of 15)	2.3542	-	-	0.0016501	-	-	-	-	-	-	-	-	DMR	-	-
BRIX1	A0A0D9RX15	Ribosome biogenesis protein BRX1 homolog (Brix domain-containing protein 2)	chromosome [GO:0005694]; nucleolus [GO:0005730]; rRNA binding [GO:0019843]; ribosomal large subunit assembly [GO:0000027]; rRNA processing [GO:0006364]	Required for biogenesis of the 60S ribosomal subunit. {ECO:0000256|ARBA:ARBA00003439}.	-	-	exon (XM_007961333.2, exon 6 of 10)	1.12041	-	-	0.00155845	-	-	-	-	-	-	-	-	DMR	-	-
BRK1	-	-	-	-	-	-	-	-	-	-	-	-	-	-	-	-1.72263	-	-	0.000201689	-	-	DEG
BRMS1	A0A0D9R759	BRMS1 transcriptional repressor and anoikis regulator	cytoplasm [GO:0005737]; nucleoplasm [GO:0005654]; NF-kappaB binding [GO:0051059]; negative regulation of DNA-templated transcription [GO:0045892]; positive regulation of anoikis [GO:2000210]; positive regulation of protein deacetylation [GO:0090312]	-	-	-	exon (XM_007976133.2, exon 8 of 9)	-1.58752	-1.35312	-	3.72476e-05	0.000330218	-	-	-	-1.02678	-	-	0.0365439	DMR	DMR	DEG
BRMS1	A0A0D9R759	BRMS1 transcriptional repressor and anoikis regulator	cytoplasm [GO:0005737]; nucleoplasm [GO:0005654]; NF-kappaB binding [GO:0051059]; negative regulation of DNA-templated transcription [GO:0045892]; positive regulation of anoikis [GO:2000210]; positive regulation of protein deacetylation [GO:0090312]	-	-	-	exon (XM_007976133.2, exon 7 of 9)	-1.40362	-1.58445	-	7.09337e-14	7.84453e-16	-	-	-	-1.02678	-	-	0.0365439	DMR	DMR	DEG
BRMS1L	A0A0D9RSI8	BRMS1 like transcriptional repressor	nucleoplasm [GO:0005654]	-	-	-	-	-	-	-	-	-	-	-	-	-1.20201	-	-	0.00738634	-	-	DEG
BROX	A0A0D9RTX6	BRO1 domain-containing protein BROX (BRO1 domain- and CAAX motif-containing protein)	nuclear envelope [GO:0005635]; mitotic nuclear membrane reassembly [GO:0007084]	-	-	-	exon (XM_007988370.2, exon 6 of 13)	1.02299	-	-	6.13213e-12	-	-	-	-	-	-	-	-	DMR	-	-
BRPF1	A0A0D9RE58	Bromodomain and PHD finger containing 1	cytosol [GO:0005829]; MOZ/MORF histone acetyltransferase complex [GO:0070776]; nucleus [GO:0005634]; plasma membrane [GO:0005886]; acetyltransferase activator activity [GO:0010698]; histone H4K12 acetyltransferase activity [GO:0043997]; histone H4K5 acetyltransferase activity [GO:0043995]; histone H4K8 acetyltransferase activity [GO:0043996]; positive regulation of DNA-templated transcription [GO…	-	-	-	-	-	-	-	-	-	-	-	-	1.23994	-	-	0.0202706	-	-	DEG
BRSK1	A0A0D9S5Z3	BR serine/threonine kinase 1	centrosome [GO:0005813]; cytoplasm [GO:0005737]; nucleoplasm [GO:0005654]; presynapse [GO:0098793]; ATP binding [GO:0005524]; gamma-tubulin binding [GO:0043015]; magnesium ion binding [GO:0000287]; protein kinase binding [GO:0019901]; protein serine/threonine kinase activity [GO:0004674]; tau-protein kinase activity [GO:0050321]; associative learning [GO:0008306]; axonogenesis [GO:0007409]; centr…	-	-	-	-	-	-	-	-	-	-	-	-	1.95471	-	-	6.20982e-05	-	-	DEG
BRWD1	A0A0D9R7U4	Bromodomain and WD repeat domain containing 1	axoneme [GO:0005930]; cytosol [GO:0005829]; motile cilium [GO:0031514]; nucleolus [GO:0005730]; cytoskeleton organization [GO:0007010]; regulation of cell shape [GO:0008360]; regulation of transcription by RNA polymerase II [GO:0006357]	-	-	-	exon (XM_007968190.2, exon 29 of 41)	1.05024	-	-	0.00271126	-	-	-	-	1.36624	-	-	2.35514e-07	DMR	-	DEG
BSCL2	A0A0D9R2W3	Seipin	endoplasmic reticulum membrane [GO:0005789]; lipid droplet [GO:0005811]; phospholipid binding [GO:0005543]; lipid droplet formation [GO:0140042]; lipid metabolic process [GO:0006629]	-	-	-	-	-	-	-	-	-	-	-	-	1.36648	-	-	0.027922	-	-	DEG
BSDC1	A0A0D9S7W8	BSD domain containing 1	cytoplasm [GO:0005737]	-	-	-	exon (XM_007979580.2, exon 11 of 11)	-	-1.18621	-	-	0.000131946	-	-	-	-	-	-	-	-	DMR	-
BSG	A0A0D9RKP4	Basigin	acrosomal membrane [GO:0002080]; axon [GO:0030424]; basolateral plasma membrane [GO:0016323]; endoplasmic reticulum membrane [GO:0005789]; photoreceptor inner segment [GO:0001917]; cell-cell adhesion mediator activity [GO:0098632]; D-mannose binding [GO:0005537]; axon guidance [GO:0007411]; dendrite self-avoidance [GO:0070593]; homophilic cell adhesion via plasma membrane adhesion molecules [GO:0…	-	-	GO:0002376~immune system process	-	-	-	-	-	-	-	-	-	-2.70157	-	-	5.36621e-15	-	-	DEG
BTAF1	A0A0D9R2N4	B-TFIID TATA-box binding protein associated factor 1	nucleoplasm [GO:0005654]; ATP binding [GO:0005524]; ATP hydrolysis activity [GO:0016887]; ATP-dependent activity, acting on DNA [GO:0008094]; DNA binding [GO:0003677]; helicase activity [GO:0004386]; TBP-class protein binding [GO:0017025]; transcription coregulator activity [GO:0003712]; negative regulation of DNA-templated transcription [GO:0045892]	-	-	-	exon (XM_007963543.2, exon 9 of 38)	-	1.03777	-	-	0.00869765	-	-	-	1.11312	-	-	0.00134184	-	DMR	DEG
BTAF1	A0A0D9R2N4	B-TFIID TATA-box binding protein associated factor 1	nucleoplasm [GO:0005654]; ATP binding [GO:0005524]; ATP hydrolysis activity [GO:0016887]; ATP-dependent activity, acting on DNA [GO:0008094]; DNA binding [GO:0003677]; helicase activity [GO:0004386]; TBP-class protein binding [GO:0017025]; transcription coregulator activity [GO:0003712]; negative regulation of DNA-templated transcription [GO:0045892]	-	-	-	exon (XM_007963538.2, exon 26 of 38)	1.10344	-	-	0.0124047	-	-	-	-	1.11312	-	-	0.00134184	DMR	-	DEG
BTBD1	A0A0D9RXJ4	BTB domain containing 1	cytosol [GO:0005829]; nucleoplasm [GO:0005654]; P-body [GO:0000932]; protein-containing complex [GO:0032991]; cullin family protein binding [GO:0097602]; identical protein binding [GO:0042802]; neurogenesis [GO:0022008]	-	-	-	exon (XM_007990227.2, exon 8 of 8)	-	1.45016	-	-	0.00406391	-	-	-	-	-	-	-	-	DMR	-
BTD	A0A0D9RCL2	Biotinidase (EC 3.5.1.12)	hydrolase activity, acting on carbon-nitrogen (but not peptide) bonds, in linear amides [GO:0016811]; biotin metabolic process [GO:0006768]	Catalytic release of biotin from biocytin, the product of biotin-dependent carboxylases degradation. {ECO:0000256|ARBA:ARBA00037073}.	-	-	exon (XM_008009189.2, exon 4 of 4)	-1.04769	-	-	0.0158002	-	-	-	-	-	-	-	-	DMR	-	-
BTF3	A0A0D9RSK8	Transcription factor BTF3	cytosol [GO:0005829]; nascent polypeptide-associated complex [GO:0005854]; in utero embryonic development [GO:0001701]; negative regulation of protein localization to endoplasmic reticulum [GO:1905551]	-	-	-	-	-	-	-	-	-	-	-	-	-1.37837	-	-	0.0057214	-	-	DEG
BTG1	A0A0D9QUR1	Protein BTG1 (B-cell translocation gene 1 protein)	cytoplasm [GO:0005737]; nucleus [GO:0005634]; enzyme binding [GO:0019899]; cell population proliferation [GO:0008283]; negative regulation of cell population proliferation [GO:0008285]; positive regulation of angiogenesis [GO:0045766]; positive regulation of endothelial cell differentiation [GO:0045603]; positive regulation of fibroblast apoptotic process [GO:2000271]; positive regulation of myob…	Anti-proliferative protein. {ECO:0000256|ARBA:ARBA00004004}.	-	-	-	-	-	-	-	-	-	-	-	-1.96494	-	-	0.000873032	-	-	DEG
BTG2	A0A0D9RPD4	BTG anti-proliferation factor 2	cytoplasm [GO:0005737]; nucleus [GO:0005634]; anterior/posterior pattern specification [GO:0009952]; associative learning [GO:0008306]; central nervous system neuron development [GO:0021954]; dentate gyrus development [GO:0021542]; DNA damage response [GO:0006974]; negative regulation of neuroblast proliferation [GO:0007406]; negative regulation of translation [GO:0017148]; neuroblast proliferati…	-	-	-	exon (XM_007988885.2, exon 1 of 2)	1.18262	-	-	0.00131667	-	-	-	-	-	-	-	-	DMR	-	-
BTG2	A0A0D9RPD4	BTG anti-proliferation factor 2	cytoplasm [GO:0005737]; nucleus [GO:0005634]; anterior/posterior pattern specification [GO:0009952]; associative learning [GO:0008306]; central nervous system neuron development [GO:0021954]; dentate gyrus development [GO:0021542]; DNA damage response [GO:0006974]; negative regulation of neuroblast proliferation [GO:0007406]; negative regulation of translation [GO:0017148]; neuroblast proliferati…	-	-	-	exon (XM_007988885.2, exon 2 of 2)	1.67575	-	-	0.00171806	-	-	-	-	-	-	-	-	DMR	-	-
BTN2A2	-	-	-	-	-	-	-	-	-	-	-	-	-	-	-	1.04376	-	-	0.00343234	-	-	DEG
BUB1	A0A0D9RWF5	BUB1 mitotic checkpoint serine/threonine kinase	cytosol [GO:0005829]; nucleoplasm [GO:0005654]; outer kinetochore [GO:0000940]; ATP binding [GO:0005524]; histone H2A kinase activity [GO:0140995]; protein serine/threonine kinase activity [GO:0004674]; meiotic sister chromatid cohesion, centromeric [GO:0051754]; mitotic spindle assembly checkpoint signaling [GO:0007094]; positive regulation of maintenance of mitotic sister chromatid cohesion, ce…	-	-	-	-	-	-	-	-	-	-	-	-	-1.4546	-	-	0.0211129	-	-	DEG
BUB1B	A0A0D9R4T1	BUB1 mitotic checkpoint serine/threonine kinase B	cytosol [GO:0005829]; mitotic checkpoint complex [GO:0033597]; outer kinetochore [GO:0000940]; perinuclear region of cytoplasm [GO:0048471]; spindle [GO:0005819]; protein kinase activity [GO:0004672]; meiotic sister chromatid cohesion, centromeric [GO:0051754]; metaphase/anaphase transition of mitotic cell cycle [GO:0007091]; mitotic spindle assembly checkpoint signaling [GO:0007094]; protein loc…	-	-	-	-	-	-	-	-	-	-	-	-	-1.05368	-	-	0.0116499	-	-	DEG
BUD13	A0A0D9S382	BUD13 homolog	nucleoplasm [GO:0005654]; RES complex [GO:0070274]; U2-type precatalytic spliceosome [GO:0071005]; RNA binding [GO:0003723]; mRNA splicing, via spliceosome [GO:0000398]	-	-	-	exon (XM_008020968.2, exon 4 of 10)	-	-1.59133	-	-	0.000322682	-	-	-	-	-	-	-	-	DMR	-
BUD23	A0A0D9S007	BUD23 rRNA methyltransferase and ribosome maturation factor	nucleolus [GO:0005730]; nucleoplasm [GO:0005654]; perinuclear region of cytoplasm [GO:0048471]; protein heterodimerization activity [GO:0046982]; rRNA (guanine) methyltransferase activity [GO:0016435]; positive regulation of rRNA processing [GO:2000234]; rRNA (guanine-N7)-methylation [GO:0070476]	-	-	-	promoter-TSS (XM_008018342.2)	-1.15678	-	-	0.000935726	-	-	-	-	-	-	-	-	DMR	-	-
BZW1	A0A0D9REY7	Basic leucine zipper and W2 domains 1	cytoplasm [GO:0005737]; membrane [GO:0016020]; regulation of translational initiation [GO:0006446]	-	-	-	-	-	-	-	-	-	-	-	-	-1.3772	-	-	0.00020904	-	-	DEG
BZW2	A0A0D9RLZ6	eIF5-mimic protein 1 (Basic leucine zipper and W2 domain-containing protein 2)	cytoplasm [GO:0005737]; membrane [GO:0016020]; regulation of translational initiation [GO:0006446]	Translation initiation regulator which represses non-AUG initiated translation and repeat-associated non-AUG (RAN) initiated translation by acting as a competitive inhibitor of eukaryotic translation initiation factor 5 (EIF5) function. Increases the accuracy of translation initiation by impeding EIF5-dependent translation from non-AUG codons by competing with it for interaction with EIF2S2 withi…	-	-	-	-	-	-	-	-	-	-	-	-1.82316	-	-	0.00108312	-	-	DEG
C1GALT1C1	A0A0D9SDN9	C1GALT1 specific chaperone 1	membrane [GO:0016020]; glycoprotein-N-acetylgalactosamine 3-beta-galactosyltransferase activity [GO:0016263]; core 1 O-glycan biosynthetic process [GO:0016267]; platelet activation [GO:0030168]; platelet morphogenesis [GO:0036344]	-	-	-	-	-	-	-	-	-	-	-	-	-2.05884	-	-	0.00897915	-	-	DEG
C1QTNF6	A0A0D9R5B4	C1q and TNF related 6	extracellular space [GO:0005615]; membrane [GO:0016020]; protein-containing complex [GO:0032991]; identical protein binding [GO:0042802]	-	-	-	-	-	-	-	-	-	-	-	-	-3.16632	-	-	3.45423e-05	-	-	DEG
CA11	A0A0D9S2X6	Carbonic anhydrase-related protein 11 (CA-RP XI)	basolateral plasma membrane [GO:0016323]; extracellular region [GO:0005576]; carbonate dehydratase activity [GO:0004089]; zinc ion binding [GO:0008270]; one-carbon metabolic process [GO:0006730]	Does not have a catalytic activity. {ECO:0000256|ARBA:ARBA00002258}.	-	-	-	-	-	-	-	-	-	-	-	-1.86934	-	-	0.0014982	-	-	DEG
CA12	A0A0D9RIT7	Carbonic anhydrase (EC 4.2.1.1)	plasma membrane [GO:0005886]; carbonate dehydratase activity [GO:0004089]; zinc ion binding [GO:0008270]; chloride ion homeostasis [GO:0055064]	Reversible hydration of carbon dioxide. {ECO:0000256|RuleBase:RU367011}.	-	-	-	-	-	-	-	-	-	-	-	-2.63463	-	-	6.00847e-05	-	-	DEG
CACHD1	A0A0D9S729	Cache domain containing 1	voltage-gated calcium channel complex [GO:0005891]; voltage-gated calcium channel activity [GO:0005245]	-	-	-	-	-	-	-	-	-	-	-	-	-1.93015	-	-	0.000589912	-	-	DEG
CACNA1B	A0A0D9RWC5	Voltage-dependent N-type calcium channel subunit alpha	neuronal cell body [GO:0043025]; synapse [GO:0045202]; voltage-gated calcium channel complex [GO:0005891]; calcium ion binding [GO:0005509]; high voltage-gated calcium channel activity [GO:0008331]; calcium ion import across plasma membrane [GO:0098703]; chemical synaptic transmission [GO:0007268]; modulation of chemical synaptic transmission [GO:0050804]; response to amyloid-beta [GO:1904645]	Voltage-sensitive calcium channels (VSCC) mediate the entry of calcium ions into excitable cells and are also involved in a variety of calcium-dependent processes, including muscle contraction, hormone or neurotransmitter release, gene expression, cell motility, cell division and cell death. This alpha-1B subunit gives rise to N-type calcium currents. N-type calcium channels belong to the 'high-v…	-	-	exon (XM_008005415.2, exon 20 of 49)	-	2.32954	-	-	0.00149757	-	-	-	-	-	-	-	-	DMR	-
CACNA1B	A0A0D9RWC5	Voltage-dependent N-type calcium channel subunit alpha	neuronal cell body [GO:0043025]; synapse [GO:0045202]; voltage-gated calcium channel complex [GO:0005891]; calcium ion binding [GO:0005509]; high voltage-gated calcium channel activity [GO:0008331]; calcium ion import across plasma membrane [GO:0098703]; chemical synaptic transmission [GO:0007268]; modulation of chemical synaptic transmission [GO:0050804]; response to amyloid-beta [GO:1904645]	Voltage-sensitive calcium channels (VSCC) mediate the entry of calcium ions into excitable cells and are also involved in a variety of calcium-dependent processes, including muscle contraction, hormone or neurotransmitter release, gene expression, cell motility, cell division and cell death. This alpha-1B subunit gives rise to N-type calcium currents. N-type calcium channels belong to the 'high-v…	-	-	intron (XM_008005423.2, intron 18 of 47)	-	1.68424	-	-	0.0272196	-	-	-	-	-	-	-	-	DMR	-
CACNA1G	A0A0D9QZI8	Voltage-dependent T-type calcium channel subunit alpha	cytoplasm [GO:0005737]; synapse [GO:0045202]; voltage-gated calcium channel complex [GO:0005891]; high voltage-gated calcium channel activity [GO:0008331]; low voltage-gated calcium channel activity [GO:0008332]; metal ion binding [GO:0046872]; scaffold protein binding [GO:0097110]; action potential [GO:0001508]; calcium ion import across plasma membrane [GO:0098703]; chemical synaptic transmissi…	Voltage-sensitive calcium channels (VSCC) mediate the entry of calcium ions into excitable cells and are also involved in a variety of calcium-dependent processes, including muscle contraction, hormone or neurotransmitter release, gene expression, cell motility, cell division and cell death. This channel gives rise to T-type calcium currents. T-type calcium channels belong to the "low-voltage act…	-	-	-	-	-	-	-	-	-	-	-	1.79763	-	-	0.0193686	-	-	DEG
CACNA2D1	A0A0D9RHZ3	Calcium voltage-gated channel auxiliary subunit alpha2delta 1	GABA-ergic synapse [GO:0098982]; L-type voltage-gated calcium channel complex [GO:1990454]; neuronal dense core vesicle [GO:0098992]; presynaptic active zone membrane [GO:0048787]; sarcoplasmic reticulum [GO:0016529]; voltage-gated calcium channel activity involved in bundle of His cell action potential [GO:0086057]; cardiac muscle cell action potential involved in contraction [GO:0086002]; cellu…	-	-	-	exon (XM_007982343.2, exon 30 of 40)	1.10307	-	-	0.00899143	-	-	-	-	-	-	-	-	DMR	-	-
CACNA2D1	A0A0D9RHZ3	Calcium voltage-gated channel auxiliary subunit alpha2delta 1	GABA-ergic synapse [GO:0098982]; L-type voltage-gated calcium channel complex [GO:1990454]; neuronal dense core vesicle [GO:0098992]; presynaptic active zone membrane [GO:0048787]; sarcoplasmic reticulum [GO:0016529]; voltage-gated calcium channel activity involved in bundle of His cell action potential [GO:0086057]; cardiac muscle cell action potential involved in contraction [GO:0086002]; cellu…	-	-	-	exon (XM_007982343.2, exon 26 of 40)	-	1.17789	-	-	0.0298773	-	-	-	-	-	-	-	-	DMR	-
CACNB1	A0A0D9S3D2	Voltage-dependent L-type calcium channel subunit beta-1 (Calcium channel voltage-dependent subunit beta 1)	sarcolemma [GO:0042383]; voltage-gated calcium channel complex [GO:0005891]; calcium channel regulator activity [GO:0005246]; voltage-gated calcium channel activity [GO:0005245]; cellular response to amyloid-beta [GO:1904646]; regulation of calcium ion transmembrane transport via high voltage-gated calcium channel [GO:1902514]	Regulatory subunit of L-type calcium channels. Regulates the activity of L-type calcium channels that contain CACNA1A as pore-forming subunit. Regulates the activity of L-type calcium channels that contain CACNA1C as pore-forming subunit and increases the presence of the channel complex at the cell membrane. Required for functional expression L-type calcium channels that contain CACNA1D as pore-f…	-	-	-	-	-	-	-	-	-	-	-	1.32222	-	-	0.0458788	-	-	DEG
CACTIN	A0A0D9RFE0	Splicing factor Cactin	catalytic step 2 spliceosome [GO:0071013]; cytosol [GO:0005829]; nuclear speck [GO:0016607]; cellular response to interleukin-1 [GO:0071347]; cellular response to lipopolysaccharide [GO:0071222]; cellular response to tumor necrosis factor [GO:0071356]; mRNA cis splicing, via spliceosome [GO:0045292]; negative regulation of canonical NF-kappaB signal transduction [GO:0043124]; negative regulation …	-	-	-	exon (XM_007994789.2, exon 3 of 10)	-1.29758	-1.19703	-	3.09119e-06	0.000824082	-	-	-	-	-	-	-	DMR	DMR	-
CADM2	A0A0D9R0T3	Cell adhesion molecule 2	neuronal cell body membrane [GO:0032809]; homophilic cell adhesion via plasma membrane adhesion molecules [GO:0007156]	-	-	-	-	-	-	-	-	-	-	-	-	-2.22432	-	-	0.0403831	-	-	DEG
CALCOCO1	A0A0D9QZI6	Calcium-binding and coiled-coil domain-containing protein 1	chromatin [GO:0000785]; cytosol [GO:0005829]; nucleus [GO:0005634]; beta-catenin binding [GO:0008013]; chromatin binding [GO:0003682]; metal ion binding [GO:0046872]; nuclear receptor coactivator activity [GO:0030374]; RNA polymerase II cis-regulatory region sequence-specific DNA binding [GO:0000978]; nuclear receptor-mediated steroid hormone signaling pathway [GO:0030518]; positive regulation of…	Functions as a coactivator for aryl hydrocarbon and nuclear receptors (NR). Recruited to promoters through its contact with the N-terminal basic helix-loop-helix-Per-Arnt-Sim (PAS) domain of transcription factors or coactivators, such as NCOA2. During ER-activation acts synergistically in combination with other NCOA2-binding proteins, such as EP300, CREBBP and CARM1. Involved in the transcription…	-	-	exon (XM_008003478.2, exon 10 of 16)	-1.06688	-	-	5.86427e-05	-	-	-	-	-	-	-	-	DMR	-	-
CALCOCO1	A0A0D9QZI6	Calcium-binding and coiled-coil domain-containing protein 1	chromatin [GO:0000785]; cytosol [GO:0005829]; nucleus [GO:0005634]; beta-catenin binding [GO:0008013]; chromatin binding [GO:0003682]; metal ion binding [GO:0046872]; nuclear receptor coactivator activity [GO:0030374]; RNA polymerase II cis-regulatory region sequence-specific DNA binding [GO:0000978]; nuclear receptor-mediated steroid hormone signaling pathway [GO:0030518]; positive regulation of…	Functions as a coactivator for aryl hydrocarbon and nuclear receptors (NR). Recruited to promoters through its contact with the N-terminal basic helix-loop-helix-Per-Arnt-Sim (PAS) domain of transcription factors or coactivators, such as NCOA2. During ER-activation acts synergistically in combination with other NCOA2-binding proteins, such as EP300, CREBBP and CARM1. Involved in the transcription…	-	-	exon (XM_008003478.2, exon 11 of 16)	-	-1.2418	-	-	1.3791e-07	-	-	-	-	-	-	-	-	DMR	-
CALCOCO2	A0A0D9S3U8	Calcium-binding and coiled-coil domain-containing protein 2 (Nuclear domain 10 protein NDP52)	autophagosome membrane [GO:0000421]; cytoplasmic vesicle [GO:0031410]; cytoskeleton [GO:0005856]; cytosol [GO:0005829]; perinuclear region of cytoplasm [GO:0048471]; PML body [GO:0016605]; metal ion binding [GO:0046872]; protein homodimerization activity [GO:0042803]; positive regulation of autophagosome maturation [GO:1901098]; response to type II interferon [GO:0034341]; xenophagy [GO:0098792]	-	-	-	-	-	-	-	-	-	-	-	-	-1.04344	-	-	0.00010306	-	-	DEG
CALM2	-	-	-	-	-	-	-	-	-	-	-	-	-	-	-	-1.65636	-	-	9.69718e-05	-	-	DEG
CALM3	-	-	-	-	-	-	-	-	-	-	-	-	-	-	-	-2.81971	-	-	3.45657e-21	-	-	DEG
CALR	A0A0D9R2H5	Calreticulin	cortical granule [GO:0060473]; cytosol [GO:0005829]; endoplasmic reticulum quality control compartment [GO:0044322]; external side of plasma membrane [GO:0009897]; extracellular space [GO:0005615]; MHC class I peptide loading complex [GO:0042824]; nuclear envelope [GO:0005635]; perinuclear region of cytoplasm [GO:0048471]; ribosome [GO:0005840]; sarcoplasmic reticulum lumen [GO:0033018]; calcium …	-	-	GO:0002682~regulation of immune system process;GO:0002376~immune system process;GO:0002684~positive regulation of immune system process	-	-	-	-	-	-	-	-	-	-3.22541	-	-	1.80112e-08	-	-	DEG
CALU	A0A0D9RCF2	Calumenin	endoplasmic reticulum membrane [GO:0005789]; extracellular region [GO:0005576]; Golgi apparatus [GO:0005794]; melanosome [GO:0042470]; sarcoplasmic reticulum lumen [GO:0033018]; calcium ion binding [GO:0005509]	-	-	-	-	-	-	-	-	-	-	-	-	-1.57609	-	-	3.68147e-06	-	-	DEG
CAMK1D	A0A0D9RLA9	Calcium/calmodulin dependent protein kinase ID	cytoplasm [GO:0005737]; nucleus [GO:0005634]; ATP binding [GO:0005524]; calcium/calmodulin-dependent protein kinase activity [GO:0004683]; negative regulation of apoptotic process [GO:0043066]; positive regulation of apoptotic process [GO:0043065]; positive regulation of neuron projection development [GO:0010976]; positive regulation of neutrophil chemotaxis [GO:0090023]; positive regulation of p…	-	-	-	-	-	-	-	-	-	-	-	-	1.52235	-	-	0.0349526	-	-	DEG
CAMK2B	A0A0D9RSU7	calcium/calmodulin-dependent protein kinase (EC 2.7.11.17)	calcium- and calmodulin-dependent protein kinase complex [GO:0005954]; ATP binding [GO:0005524]; calcium/calmodulin-dependent protein kinase activity [GO:0004683]; calmodulin binding [GO:0005516]; protein homodimerization activity [GO:0042803]; regulation of neuron migration [GO:2001222]	-	-	-	-	-	-	-	-	-	-	-	-	1.61254	-	-	0.0051124	-	-	DEG
CAMK2G	A0A0D9R9D2	calcium/calmodulin-dependent protein kinase (EC 2.7.11.17)	ATP binding [GO:0005524]; calcium/calmodulin-dependent protein kinase activity [GO:0004683]; calmodulin binding [GO:0005516]	-	-	-	exon (XM_007962968.2, exon 23 of 23)	-	-1.04222	-	-	0.00351047	-	-	-	-	-	-	-	-	DMR	-
CAMK2N2	A0A0D9RMJ5	Calcium/calmodulin-dependent protein kinase II inhibitor 2	cytosol [GO:0005829]; nucleus [GO:0005634]; synapse [GO:0045202]; calcium-dependent protein kinase inhibitor activity [GO:0008427]; protein kinase binding [GO:0019901]	Potent and specific cellular inhibitor of CaM-kinase II (CAMK2). Traps Ca(2+)/calmodulin on CAMK2. {ECO:0000256|ARBA:ARBA00046078}.	-	-	exon (XM_007971907.2, exon 1 of 2)	-	1.76034	-	-	0.0171524	-	-	-	-	-	-	-	-	DMR	-
CAMKK1	A0A0D9RM19	calcium/calmodulin-dependent protein kinase (EC 2.7.11.17)	ATP binding [GO:0005524]; protein serine/threonine kinase activity [GO:0004674]; CAMKK-AMPK signaling cascade [GO:0061762]	-	-	-	-	-	-	-	-	-	-	-	-	1.701	-	-	0.0192814	-	-	DEG
CAMLG	A0A0D9RLY0	Guided entry of tail-anchored proteins factor (Calcium signal-modulating cyclophilin ligand)	endoplasmic reticulum membrane [GO:0005789]; GET complex [GO:0043529]; ubiquitin protein ligase binding [GO:0031625]; negative regulation of proteasomal ubiquitin-dependent protein catabolic process [GO:0032435]; negative regulation of protein ubiquitination [GO:0031397]; protein stabilization [GO:0050821]; tail-anchored membrane protein insertion into ER membrane [GO:0071816]	Required for the post-translational delivery of tail-anchored (TA) proteins to the endoplasmic reticulum. Together with GET1/WRB, acts as a membrane receptor for soluble GET3/TRC40, which recognizes and selectively binds the transmembrane domain of TA proteins in the cytosol. Required for the stability of GET1. Stimulates calcium signaling in T cells through its involvement in elevation of intrac…	-	-	-	-	-	-	-	-	-	-	-	-1.31217	-	-	0.00299514	-	-	DEG
CAMSAP1	A0A0D9RT62	Calmodulin regulated spectrin associated protein 1	microtubule minus-end [GO:0036449]; calmodulin binding [GO:0005516]; microtubule minus-end binding [GO:0051011]; spectrin binding [GO:0030507]; cytoplasmic microtubule organization [GO:0031122]; negative regulation of microtubule depolymerization [GO:0007026]; neuron projection development [GO:0031175]; regulation of cell morphogenesis [GO:0022604]; regulation of microtubule polymerization [GO:00…	-	-	-	exon (XM_008005665.2, exon 10 of 17)	-1.01727	-	-	0.000837671	-	-	-	-	-	-	-	-	DMR	-	-
CAMSAP1	A0A0D9RT62	Calmodulin regulated spectrin associated protein 1	microtubule minus-end [GO:0036449]; calmodulin binding [GO:0005516]; microtubule minus-end binding [GO:0051011]; spectrin binding [GO:0030507]; cytoplasmic microtubule organization [GO:0031122]; negative regulation of microtubule depolymerization [GO:0007026]; neuron projection development [GO:0031175]; regulation of cell morphogenesis [GO:0022604]; regulation of microtubule polymerization [GO:00…	-	-	-	exon (XM_008005665.2, exon 11 of 17)	-1.68723	-	-	1.27749e-05	-	-	-	-	-	-	-	-	DMR	-	-
CAMSAP1	A0A0D9RT62	Calmodulin regulated spectrin associated protein 1	microtubule minus-end [GO:0036449]; calmodulin binding [GO:0005516]; microtubule minus-end binding [GO:0051011]; spectrin binding [GO:0030507]; cytoplasmic microtubule organization [GO:0031122]; negative regulation of microtubule depolymerization [GO:0007026]; neuron projection development [GO:0031175]; regulation of cell morphogenesis [GO:0022604]; regulation of microtubule polymerization [GO:00…	-	-	-	exon (XM_008005665.2, exon 13 of 17)	-1.01454	-	-	0.00529739	-	-	-	-	-	-	-	-	DMR	-	-
CAMSAP2	A0A0D9RMX0	Calmodulin regulated spectrin associated protein family member 2	centrosome [GO:0005813]; cytosol [GO:0005829]; Golgi apparatus [GO:0005794]; microtubule minus-end [GO:0036449]; calmodulin binding [GO:0005516]; microtubule minus-end binding [GO:0051011]; spectrin binding [GO:0030507]; axon development [GO:0061564]; cytoplasmic microtubule organization [GO:0031122]; negative regulation of microtubule depolymerization [GO:0007026]; regulation of dendrite develop…	-	-	-	exon (XM_007989015.2, exon 18 of 18)	-	1.1248	-	-	0.0132983	-	-	-	-	-	-	-	-	DMR	-
CAMSAP3	A0A0D9R7M8	Calmodulin regulated spectrin associated protein family member 3	axoneme [GO:0005930]; centrosome [GO:0005813]; ciliary basal body [GO:0036064]; microtubule minus-end [GO:0036449]; motile cilium [GO:0031514]; zonula adherens [GO:0005915]; actin filament binding [GO:0051015]; calmodulin binding [GO:0005516]; microtubule minus-end binding [GO:0051011]; spectrin binding [GO:0030507]; cilium movement [GO:0003341]; cytoplasmic microtubule organization [GO:0031122];…	-	-	-	exon (XM_007995055.2, exon 13 of 19)	-	1.63732	-	-	0.0220146	-	-	-	-	-	-	-	-	DMR	-
CAMTA1	A0A0D9S8R5	Calmodulin binding transcription activator 1	cytosol [GO:0005829]; nucleolus [GO:0005730]; double-stranded DNA binding [GO:0003690]; sequence-specific DNA binding [GO:0043565]; transcription coregulator activity [GO:0003712]; neuromuscular process controlling balance [GO:0050885]; positive regulation of calcineurin-NFAT signaling cascade [GO:0070886]; positive regulation of transcription by RNA polymerase II [GO:0045944]	-	-	-	exon (XM_007980706.2, exon 22 of 23)	-1.24212	-	-	0.0176621	-	-	-	-	-	-	-	-	DMR	-	-
CANX	A0A0D9R7Q1	Calnexin	endoplasmic reticulum membrane [GO:0005789]; endoplasmic reticulum quality control compartment [GO:0044322]; melanosome membrane [GO:0033162]; mitochondria-associated endoplasmic reticulum membrane contact site [GO:0044233]; mitochondrial membrane [GO:0031966]; nuclear membrane [GO:0031965]; presynapse [GO:0098793]; calcium ion binding [GO:0005509]; carbohydrate binding [GO:0030246]; unfolded pro…	Calcium-binding protein that interacts with newly synthesized monoglucosylated glycoproteins in the endoplasmic reticulum. It may act in assisting protein assembly and/or in the retention within the ER of unassembled protein subunits. It seems to play a major role in the quality control apparatus of the ER by the retention of incorrectly folded proteins. Associated with partial T-cell antigen rec…	-	-	-	-	-	-	-	-	-	-	-	-1.85755	-	-	6.35653e-06	-	-	DEG
CAP1	A0A0D9S7N5	Adenylyl cyclase-associated protein	cortical actin cytoskeleton [GO:0030864]; glutamatergic synapse [GO:0098978]; plasma membrane [GO:0005886]; postsynapse [GO:0098794]; presynapse [GO:0098793]; actin binding [GO:0003779]; adenylate cyclase binding [GO:0008179]; actin filament organization [GO:0007015]; ameboidal-type cell migration [GO:0001667]; cAMP-mediated signaling [GO:0019933]; cell morphogenesis [GO:0000902]; modification of…	Directly regulates filament dynamics and has been implicated in a number of complex developmental and morphological processes, including mRNA localization and the establishment of cell polarity. {ECO:0000256|ARBA:ARBA00003250}.	-	-	-	-	-	-	-	-	-	-	-	-1.79197	-	-	0.00235306	-	-	DEG
CAP2	A0A0D9R5I4	Adenylyl cyclase-associated protein	cytoplasm [GO:0005737]; plasma membrane [GO:0005886]; postsynaptic density [GO:0014069]; actin binding [GO:0003779]; adenylate cyclase binding [GO:0008179]; identical protein binding [GO:0042802]; actin filament organization [GO:0007015]; cAMP-mediated signaling [GO:0019933]; cell morphogenesis [GO:0000902]; presynaptic actin cytoskeleton organization [GO:0099140]	-	-	-	-	-	-	-	-	-	-	-	-	1.53794	-	-	0.0239249	-	-	DEG
CAPN1	A0A0D9R5U5	Calpain-1 catalytic subunit (EC 3.4.22.52) (Calcium-activated neutral proteinase 1) (Calpain mu-type) (Calpain-1 large subunit) (Micromolar-calpain)	cornified envelope [GO:0001533]; cytosol [GO:0005829]; lysosome [GO:0005764]; mitochondrion [GO:0005739]; calcium ion binding [GO:0005509]; calcium-dependent cysteine-type endopeptidase activity [GO:0004198]; mammary gland involution [GO:0060056]; receptor catabolic process [GO:0032801]; self proteolysis [GO:0097264]	-	-	-	-	-	-	-	-	-	-	-	-	-1.60101	-	-	0.00360034	-	-	DEG
CAPN2	A0A0D9RUD1	Calpain-2 catalytic subunit (EC 3.4.22.53) (Calcium-activated neutral proteinase 2) (Calpain M-type) (Calpain-2 large subunit) (Millimolar-calpain)	calpain complex [GO:0110158]; chromatin [GO:0000785]; cytosol [GO:0005829]; Golgi apparatus [GO:0005794]; lysosome [GO:0005764]; membrane raft [GO:0045121]; nucleus [GO:0005634]; perinuclear endoplasmic reticulum [GO:0097038]; plasma membrane [GO:0005886]; postsynapse [GO:0098794]; presynapse [GO:0098793]; pseudopodium [GO:0031143]; calcium ion binding [GO:0005509]; calcium-dependent cysteine-typ…	-	-	-	-	-	-	-	-	-	-	-	-	-1.96458	-	-	0.00173949	-	-	DEG
CAPN5	A0A0D9QV50	Calpain 5	cell surface [GO:0009986]; cytoplasm [GO:0005737]; synapse [GO:0045202]; calcium-dependent cysteine-type endopeptidase activity [GO:0004198]; proteolysis [GO:0006508]	-	-	-	-	-	-	-	-	-	-	-	-	-1.74968	-	-	0.00852569	-	-	DEG
CAPNS1	A0A0D9QW63	Calpain small subunit 1	calpain complex [GO:0110158]; cytosol [GO:0005829]; endomembrane system [GO:0012505]; membrane [GO:0016020]; calcium ion binding [GO:0005509]; calcium-dependent cysteine-type endopeptidase activity [GO:0004198]	-	-	-	-	-	-	-	-	-	-	-	-	-3.44237	-	-	1.84685e-07	-	-	DEG
CAPRIN1	A0A0D9QZA0	Cell cycle associated protein 1	cell leading edge [GO:0031252]; cytoplasmic stress granule [GO:0010494]; cytosol [GO:0005829]; dendrite [GO:0030425]; synapse [GO:0045202]; ATP binding [GO:0005524]; molecular condensate scaffold activity [GO:0140693]; molecular function activator activity [GO:0140677]; mRNA binding [GO:0003729]; signaling adaptor activity [GO:0035591]; generation of neurons [GO:0048699]; intracellular mRNA local…	-	-	-	-	-	-	-	-	-	-	-	-	-1.42299	-	-	0.000117538	-	-	DEG
CAPZA2	A0A0D9RET3	F-actin-capping protein subunit alpha	brush border [GO:0005903]; cortical cytoskeleton [GO:0030863]; F-actin capping protein complex [GO:0008290]; membrane [GO:0016020]; actin filament binding [GO:0051015]; actin cytoskeleton organization [GO:0030036]; barbed-end actin filament capping [GO:0051016]	F-actin-capping proteins bind in a Ca(2+)-independent manner to the fast growing ends of actin filaments (barbed end) thereby blocking the exchange of subunits at these ends. Unlike other capping proteins (such as gelsolin and severin), these proteins do not sever actin filaments. {ECO:0000256|ARBA:ARBA00025389, ECO:0000256|RuleBase:RU365077}.	-	-	exon (XM_007982680.2, exon 10 of 10)	1.02204	-	-	0.000110985	-	-	-	-	-	-	-	-	DMR	-	-
CAPZB	A0A0D9S8D8	F-actin-capping protein subunit beta	brush border [GO:0005903]; cortical cytoskeleton [GO:0030863]; F-actin capping protein complex [GO:0008290]; hippocampal mossy fiber to CA3 synapse [GO:0098686]; lamellipodium [GO:0030027]; membrane [GO:0016020]; postsynaptic density [GO:0014069]; sarcomere [GO:0030017]; Schaffer collateral - CA1 synapse [GO:0098685]; sperm head-tail coupling apparatus [GO:0120212]; WASH complex [GO:0071203]; act…	F-actin-capping proteins bind in a Ca(2+)-independent manner to the fast growing ends of actin filaments (barbed end) thereby blocking the exchange of subunits at these ends. Unlike other capping proteins (such as gelsolin and severin), these proteins do not sever actin filaments. Plays a role in the regulation of cell morphology and cytoskeletal organization. Forms, with CAPZB, the barbed end of…	-	-	-	-	-	-	-	-	-	-	-	-1.25994	-	-	0.0301771	-	-	DEG
CARMIL1	A0A0D9R674	Capping protein regulator and myosin 1 linker 1	cytosol [GO:0005829]; filamentous actin [GO:0031941]; lamellipodium [GO:0030027]; macropinosome [GO:0044354]; nuclear speck [GO:0016607]; plasma membrane [GO:0005886]; protein-containing complex binding [GO:0044877]; actin filament network formation [GO:0051639]; barbed-end actin filament uncapping [GO:0051638]; cell migration [GO:0016477]; lamellipodium assembly [GO:0030032]; macropinocytosis [G…	-	-	-	-	-	-	-	-	-	-	-	-	-1.06254	-	-	0.0211129	-	-	DEG
CASK	-	-	-	-	-	-	-	-	-	-	-	-	-	-	-	-1.35528	-	-	0.0387424	-	-	DEG
CASP2	A0A0D9R4J0	Caspase 2	cytoplasm [GO:0005737]; endopeptidase complex [GO:1905369]; nucleus [GO:0005634]; cysteine-type endopeptidase activity [GO:0004197]; identical protein binding [GO:0042802]; protein domain specific binding [GO:0019904]; cellular response to mechanical stimulus [GO:0071260]; DNA damage response, signal transduction by p53 class mediator resulting in cell cycle arrest [GO:0006977]; ectopic germ cell…	-	-	-	promoter-TSS (XM_037991194.1)	-1.40044	-	-	0.00121035	-	-	-	-	-	-	-	-	DMR	-	-
CASP3	A0A0D9S2F1	Caspase-3 (EC 3.4.22.56)	cytosol [GO:0005829]; death-inducing signaling complex [GO:0031264]; glutamatergic synapse [GO:0098978]; nucleus [GO:0005634]; postsynaptic density [GO:0014069]; aspartic-type endopeptidase activity [GO:0004190]; cyclin-dependent protein serine/threonine kinase inhibitor activity [GO:0004861]; cysteine-type endopeptidase activity [GO:0004197]; anterior neural tube closure [GO:0061713]; B cell hom…	-	-	GO:0002520~immune system development;GO:0002683~negative regulation of immune system process;GO:0002376~immune system process;GO:0002682~regulation of immune system process	exon (XM_008000391.2, exon 4 of 7)	-	1.34597	-	-	0.00173274	-	-	-	-	-	-	-	-	DMR	-
CASP6	A0A0D9QVA5	Caspase-6 (EC 3.4.22.59)	cytosol [GO:0005829]; nucleoplasm [GO:0005654]; cysteine-type endopeptidase activity [GO:0004197]; identical protein binding [GO:0042802]; activation of innate immune response [GO:0002218]; cellular response to staurosporine [GO:0072734]; epithelial cell differentiation [GO:0030855]; hepatocyte apoptotic process [GO:0097284]; intrinsic apoptotic signaling pathway by p53 class mediator [GO:0072332…	-	-	-	-	-	-	-	-	-	-	-	-	-1.5389	-	-	0.00975163	-	-	DEG
CASP7	A0A0D9QYH9	Caspase 7	cytosol [GO:0005829]; extracellular space [GO:0005615]; nucleus [GO:0005634]; aspartic-type endopeptidase activity [GO:0004190]; cysteine-type endopeptidase activity [GO:0004197]; RNA binding [GO:0003723]; cellular response to lipopolysaccharide [GO:0071222]; cellular response to staurosporine [GO:0072734]; defense response to bacterium [GO:0042742]; execution phase of apoptosis [GO:0097194]; fib…	-	-	-	-	-	-	-	-	-	-	-	-	-1.95189	-	-	0.000651938	-	-	DEG
CASP8	A0A0D9REG4	Caspase 8	CD95 death-inducing signaling complex [GO:0031265]; lamellipodium [GO:0030027]; nucleoplasm [GO:0005654]; ripoptosome [GO:0097342]; cysteine-type endopeptidase activity [GO:0004197]; death effector domain binding [GO:0035877]; identical protein binding [GO:0042802]; scaffold protein binding [GO:0097110]; ubiquitin protein ligase binding [GO:0031625]; cellular response to mechanical stimulus [GO:0…	-	-	-	-	-	-	-	-	-	-	-	-	-1.71272	-	-	0.0057092	-	-	DEG
CAST	A0A0D9RPB8	Calpastatin (Calpain inhibitor)	cytosol [GO:0005829]; endoplasmic reticulum [GO:0005783]; membrane [GO:0016020]; calcium-dependent cysteine-type endopeptidase inhibitor activity [GO:0010859]; negative regulation of type B pancreatic cell apoptotic process [GO:2000675]	Specific inhibition of calpain (calcium-dependent cysteine protease). Plays a key role in postmortem tenderization of meat and have been proposed to be involved in muscle protein degradation in living tissue. {ECO:0000256|ARBA:ARBA00002637}.	-	-	-	-	-	-	-	-	-	-	-	-2.21683	-	-	0.00173087	-	-	DEG
CASZ1	-	-	-	-	-	-	-	-	-	-	-	-	-	-	-	1.1577	-	-	0.0116495	-	-	DEG
CAT	A0A0D9QZD7	Catalase (EC 1.11.1.6)	catalase complex [GO:0062151]; mitochondrion [GO:0005739]; peroxisomal matrix [GO:0005782]; peroxisomal membrane [GO:0005778]; aminoacylase activity [GO:0004046]; catalase activity [GO:0004096]; enzyme binding [GO:0019899]; heme binding [GO:0020037]; metal ion binding [GO:0046872]; NADP binding [GO:0050661]; protein homodimerization activity [GO:0042803]; aerobic respiration [GO:0009060]; cellula…	Catalyzes the degradation of hydrogen peroxide (H(2)O(2)) generated by peroxisomal oxidases to water and oxygen, thereby protecting cells from the toxic effects of hydrogen peroxide. Promotes growth of cells including T-cells, B-cells, myeloid leukemia cells, melanoma cells, mastocytoma cells and normal and transformed fibroblast cells. {ECO:0000256|ARBA:ARBA00046257}.	-	-	-	-	-	-	-	-	-	-	-	-2.41897	-	-	3.4921e-09	-	-	DEG
CAV2	A0A0D9REV3	Caveolin	acrosomal membrane [GO:0002080]; caveolar macromolecular signaling complex [GO:0002095]; focal adhesion [GO:0005925]; Golgi membrane [GO:0000139]; perinuclear region of cytoplasm [GO:0048471]; sarcolemma [GO:0042383]; transport vesicle [GO:0030133]; protein heterodimerization activity [GO:0046982]; protein homodimerization activity [GO:0042803]; protein kinase binding [GO:0019901]; protein-macrom…	May act as a scaffolding protein within caveolar membranes. Interacts directly with G-protein alpha subunits and can functionally regulate their activity. Acts as an accessory protein in conjunction with CAV1 in targeting to lipid rafts and driving caveolae formation. The Ser-36 phosphorylated form has a role in modulating mitosis in endothelial cells. Positive regulator of cellular mitogenesis o…	-	GO:0051701~biological process involved in interaction with host;GO:0019058~viral life cycle;GO:0016032~viral process	exon (XM_007982673.2, exon 3 of 3)	1.7127	1.19554	-	7.31552e-11	2.67976e-12	-	-	-	-	-	-	-	DMR	DMR	-
CAVIN1	A0A0D9S1T8	Caveolae associated protein 1	caveola [GO:0005901]; cytosol [GO:0005829]; endoplasmic reticulum [GO:0005783]; mitochondrion [GO:0005739]; nucleus [GO:0005634]; protein-containing complex [GO:0032991]; identical protein binding [GO:0042802]; rRNA primary transcript binding [GO:0042134]; positive regulation of cell motility [GO:2000147]; protein secretion [GO:0009306]; rRNA transcription [GO:0009303]; termination of RNA polymer…	-	-	-	-	-	-	-	-	-	-	-	-	-2.1888	-	-	0.00539184	-	-	DEG
CBFB	A0A0D9QUQ5	Core-binding factor subunit beta	core-binding factor complex [GO:0016513]; sequence-specific DNA binding [GO:0043565]; transcription coactivator activity [GO:0003713]; protein polyubiquitination [GO:0000209]; regulation of transcription by RNA polymerase II [GO:0006357]	-	-	-	exon (XM_007994062.2, exon 6 of 6)	-	1.68901	-	-	1.10482e-05	-	-	-	-	-	-	-	-	DMR	-
CBR4	A0A0D9S226	3-ketoacyl-[acyl-carrier-protein] reductase beta subunit (Quinone reductase CBR4)	mitochondrial matrix [GO:0005759]; oxidoreductase complex [GO:1990204]; 3-oxoacyl-[acyl-carrier-protein] reductase (NADPH) activity [GO:0004316]; NADPH binding [GO:0070402]; NADPH dehydrogenase (quinone) activity [GO:0008753]; quinone binding [GO:0048038]; daunorubicin metabolic process [GO:0044597]; doxorubicin metabolic process [GO:0044598]; fatty acid biosynthetic process [GO:0006633]; protein…	-	-	-	TTS (XM_037993692.1)	2.08929	-	-	2.45081e-53	-	-	-	-	-1.82761	-	-	0.0143113	DMR	-	DEG
CBX1	A0A0D9S3Q7	Chromobox 1	chromocenter [GO:0010369]; chromosome, telomeric region [GO:0000781]; female pronucleus [GO:0001939]; male pronucleus [GO:0001940]; nuclear body [GO:0016604]; pericentric heterochromatin [GO:0005721]; site of DNA damage [GO:0090734]; spindle [GO:0005819]; histone methyltransferase binding [GO:1990226]; identical protein binding [GO:0042802]; DNA damage response [GO:0006974]; negative regulation o…	-	-	-	-	-	-	-	-	-	-	-	-	-1.71435	-	-	8.75782e-11	-	-	DEG
CBX3	-	-	-	-	-	-	-	-	-	-	-	-	-	-	-	-1.25088	-	-	0.000407901	-	-	DEG
CBX5	A0A0D9QZG1	Chromobox 5	chromocenter [GO:0010369]; chromosome, telomeric region [GO:0000781]; histone deacetylase complex [GO:0000118]; histone methyltransferase complex [GO:0035097]; kinetochore [GO:0000776]; nucleolus [GO:0005730]; pericentric heterochromatin [GO:0005721]; PML body [GO:0016605]; ribonucleoprotein complex [GO:1990904]; site of DNA damage [GO:0090734]; transcription repressor complex [GO:0017053]; chrom…	-	-	-	-	-	-	-	-	-	-	-	-	-1.45381	-	-	7.55584e-06	-	-	DEG
CBX8	A0A0D9S4A1	Chromobox 8	heterochromatin [GO:0000792]; nucleoplasm [GO:0005654]; PRC1 complex [GO:0035102]; chromatin binding [GO:0003682]; methylated histone binding [GO:0035064]; single-stranded RNA binding [GO:0003727]; ubiquitin-protein transferase activator activity [GO:0097027]; negative regulation of transcription by RNA polymerase II [GO:0000122]	-	-	-	exon (XM_008013158.2, exon 5 of 5)	-	-1.36721	-	-	0.0357231	-	-	-	-	-	-	-	-	DMR	-
CCDC102A	A0A0D9QXX0	Coiled-coil domain-containing protein 102A	myosin complex [GO:0016459]	-	-	-	exon (XM_007993443.2, exon 5 of 9)	-1.06266	-	-	2.54266e-29	-	-	-	-	-	-	-	-	DMR	-	-
CCDC107	A0A0D9RDD7	Coiled-coil domain containing 107	0	-	-	-	-	-	-	-	-	-	-	-	-	-1.54193	-	-	0.0108767	-	-	DEG
CCDC115	A0A0D9RWI2	Coiled-coil domain containing 115	COPI-coated vesicle [GO:0030137]; endoplasmic reticulum [GO:0005783]; endoplasmic reticulum-Golgi intermediate compartment [GO:0005793]; lysosome [GO:0005764]; vacuolar proton-transporting V-type ATPase complex [GO:0016471]; unfolded protein binding [GO:0051082]; cellular response to increased oxygen levels [GO:0036295]; intracellular iron ion homeostasis [GO:0006879]; lysosomal lumen acidificati…	-	-	-	-	-	-	-	-	-	-	-	-	-2.34771	-	-	9.35467e-09	-	-	DEG
CCDC116	A0A0D9RLW0	Coiled-coil domain containing 116	centrosome [GO:0005813]	-	-	-	-	-	-	-	-	-	-	-	-	2.65718	-	-	0.00263149	-	-	DEG
CCDC117	A0A0D9RC54	Coiled-coil domain containing 117	mitotic spindle [GO:0072686]; positive regulation of cell population proliferation [GO:0008284]; positive regulation of DNA repair [GO:0045739]	-	-	-	-	-	-	-	-	-	-	-	-	1.61192	-	-	3.94888e-06	-	-	DEG
CCDC124	A0A0D9QZI2	Coiled-coil domain containing 124	cytosol [GO:0005829]; midbody [GO:0030496]; nucleus [GO:0005634]; plasma membrane [GO:0005886]; transcription coactivator activity [GO:0003713]; transcription by RNA polymerase II [GO:0006366]	-	-	-	-	-	-	-	-	-	-	-	-	-2.26035	-	-	1.90676e-05	-	-	DEG
CCDC127	A0A0D9RXY3	Coiled-coil domain containing 127	0	-	-	-	intron (XM_037996025.1, intron 1 of 2)	-	-1.35951	-	-	4.63841e-09	-	-	-	-	-	-	-	-	DMR	-
CCDC130	-	-	-	-	-	-	-	-	-	-	-	-	-	-	-	1.22039	-	-	0.0472084	-	-	DEG
CCDC136	A0A0D9RC98	Coiled-coil domain containing 136	acrosomal membrane [GO:0002080]; acrosome assembly [GO:0001675]; single fertilization [GO:0007338]	-	-	-	-	-	-	-	-	-	-	-	-	1.06601	-	-	0.00204635	-	-	DEG
CCDC15	A0A0D9S4C0	Coiled-coil domain containing 15	centrosome [GO:0005813]	-	-	-	-	-	-	-	-	-	-	-	-	1.91036	-	-	0.00424642	-	-	DEG
CCDC167	A0A0D9RDN6	Coiled-coil domain-containing protein 167	membrane [GO:0016020]	-	-	-	TTS (XM_038006033.1)	-1.20471	-	-	0.00278672	-	-	-	-	-1.65724	-	-	0.00238898	DMR	-	DEG
CCDC17	A0A0D9S7F6	Coiled-coil domain containing 17	0	-	-	-	-	-	-	-	-	-	-	-	-	2.53619	-	-	0.000411985	-	-	DEG
CCDC181	A0A0D9RFA6	Coiled-coil domain-containing protein 181	cytoplasm [GO:0005737]; manchette [GO:0002177]; microtubule [GO:0005874]; sperm flagellum [GO:0036126]; microtubule binding [GO:0008017]	Microtubule-binding protein that localizes to the microtubular manchette of elongating spermatids. {ECO:0000256|ARBA:ARBA00002213}.	-	-	exon (XM_007989585.2, exon 3 of 6)	1.30891	-	-	0.00245522	-	-	-	-	-	-	-	-	DMR	-	-
CCDC183	-	-	-	-	-	-	TTS (XM_008005573.2)	-1.49723	-	-	7.44166e-24	-	-	-	-	-	-	-	-	DMR	-	-
CCDC25	-	-	-	-	-	-	-	-	-	-	-	-	-	-	-	-1.01094	-	-	0.00549451	-	-	DEG
CCDC32	A0A0D9R5A9	Coiled-coil domain containing 32	clathrin-coated pit [GO:0005905]; cilium organization [GO:0044782]; head development [GO:0060322]; regulation of clathrin-dependent endocytosis [GO:2000369]	-	-	-	exon (XM_008017016.2, exon 4 of 4)	-1.31995	-	-	1.47288e-07	-	-	-	-	-	-	-	-	DMR	-	-
CCDC34	A0A0D9QYT3	Coiled-coil domain containing 34	sperm midpiece [GO:0097225]; spermatogenesis [GO:0007283]	-	-	-	-	-	-	-	-	-	-	-	-	-1.61815	-	-	0.000857917	-	-	DEG
CCDC6	A0A0D9R4S8	Coiled-coil domain containing 6	cytosol [GO:0005829]; identical protein binding [GO:0042802]	-	-	-	-	-	-	-	-	-	-	-	-	-1.61682	-	-	6.62906e-08	-	-	DEG
CCDC62	A0A0D9S507	Coiled-coil domain containing 62	acrosomal vesicle [GO:0001669]; nucleus [GO:0005634]; nuclear estrogen receptor binding [GO:0030331]; nuclear receptor coactivator activity [GO:0030374]; blastocyst hatching [GO:0001835]; cellular response to estradiol stimulus [GO:0071392]; positive regulation of transcription by RNA polymerase II [GO:0045944]; spermatid development [GO:0007286]	-	-	-	-	-	-	-	-	-	-	-	-	2.62833	-	-	1.87702e-07	-	-	DEG
CCDC69	A0A0D9RF19	Coiled-coil domain containing 69	cytoplasm [GO:0005737]; midbody [GO:0030496]; nucleus [GO:0005634]; spindle midzone [GO:0051233]; microtubule binding [GO:0008017]; spindle midzone assembly [GO:0051255]	-	-	-	-	-	-	-	-	-	-	-	-	-2.04489	-	-	0.0164754	-	-	DEG
CCDC81	A0A0D9QUH6	Coiled-coil domain containing 81	centrosome [GO:0005813]	-	-	-	-	-	-	-	-	-	-	-	-	2.35766	-	-	0.0431686	-	-	DEG
CCDC85B	A0A0D9SCU1	Coiled-coil domain containing 85B	adherens junction [GO:0005912]; centrosome [GO:0005813]; nucleus [GO:0005634]; delta-catenin binding [GO:0070097]; negative regulation of cell growth [GO:0030308]; negative regulation of DNA-templated transcription [GO:0045892]; negative regulation of fat cell differentiation [GO:0045599]	-	-	-	-	-	-	-	-	-	-	-	-	-2.05321	-	-	0.00292931	-	-	DEG
CCDC90B	A0A0D9QUM6	Coiled-coil domain containing 90B	membrane [GO:0016020]; mitochondrion [GO:0005739]	-	-	-	exon (XM_008020324.2, exon 1 of 10)	1.26434	-	-	1.88089e-06	-	-	-	-	-1.79965	-	-	0.00108087	DMR	-	DEG
CCDC91	A0A0D9R5E2	Coiled-coil domain containing 91	cytosol [GO:0005829]; nucleoplasm [GO:0005654]; trans-Golgi network [GO:0005802]; identical protein binding [GO:0042802]; Golgi to lysosome transport [GO:0090160]	-	-	-	exon (XM_007968040.2, exon 4 of 11)	1.13873	-	-	0.000447137	-	-	-	-	-	-	-	-	DMR	-	-
CCDC96	-	-	-	-	-	-	exon (XM_008017997.2, exon 1 of 1)	-	1.23115	-	-	0.0104149	-	-	-	-	-	-	-	-	DMR	-
CCDC9B	A0A0D9R531	Coiled-coil domain containing 9B	0	-	-	-	promoter-TSS (XM_008017036.2)	1.76805	-	-	0.00535636	-	-	-	-	-	-	-	-	DMR	-	-
CCER2	A0A0D9QVA9	Coiled-coil glutamate rich protein 2	0	-	-	-	-	-	-	-	-	-	-	-	-	2.23318	-	-	0.0158435	-	-	DEG
CCL25	-	-	-	-	-	-	-	-	-	-	-	-	-	-	-	1.46304	-	-	0.00202155	-	-	DEG
CCM2	A0A0D9RT55	CCM2 scaffold protein	mitochondrion [GO:0005739]; protein-containing complex [GO:0032991]; blood vessel endothelial cell differentiation [GO:0060837]; cell-cell junction organization [GO:0045216]; endothelial cell development [GO:0001885]; endothelial tube morphogenesis [GO:0061154]; in utero embryonic development [GO:0001701]; inner ear development [GO:0048839]; multicellular organism growth [GO:0035264]; pericardium…	-	-	-	exon (XM_007981402.2, exon 10 of 10)	-	-1.3606	-	-	5.87588e-08	-	-	-	-	-	-	-	-	DMR	-
CCM2	A0A0D9RT55	CCM2 scaffold protein	mitochondrion [GO:0005739]; protein-containing complex [GO:0032991]; blood vessel endothelial cell differentiation [GO:0060837]; cell-cell junction organization [GO:0045216]; endothelial cell development [GO:0001885]; endothelial tube morphogenesis [GO:0061154]; in utero embryonic development [GO:0001701]; inner ear development [GO:0048839]; multicellular organism growth [GO:0035264]; pericardium…	-	-	-	exon (XM_007981402.2, exon 2 of 10)	-	-1.10052	-	-	0.000730834	-	-	-	-	-	-	-	-	DMR	-
CCM2	A0A0D9RT55	CCM2 scaffold protein	mitochondrion [GO:0005739]; protein-containing complex [GO:0032991]; blood vessel endothelial cell differentiation [GO:0060837]; cell-cell junction organization [GO:0045216]; endothelial cell development [GO:0001885]; endothelial tube morphogenesis [GO:0061154]; in utero embryonic development [GO:0001701]; inner ear development [GO:0048839]; multicellular organism growth [GO:0035264]; pericardium…	-	-	-	exon (XM_007981402.2, exon 7 of 10)	-	-1.89132	-	-	4.22905e-05	-	-	-	-	-	-	-	-	DMR	-
CCM2	A0A0D9RT55	CCM2 scaffold protein	mitochondrion [GO:0005739]; protein-containing complex [GO:0032991]; blood vessel endothelial cell differentiation [GO:0060837]; cell-cell junction organization [GO:0045216]; endothelial cell development [GO:0001885]; endothelial tube morphogenesis [GO:0061154]; in utero embryonic development [GO:0001701]; inner ear development [GO:0048839]; multicellular organism growth [GO:0035264]; pericardium…	-	-	-	exon (XM_007981402.2, exon 8 of 10)	-	-1.71596	-	-	0.000528424	-	-	-	-	-	-	-	-	DMR	-
CCM2	A0A0D9RT55	CCM2 scaffold protein	mitochondrion [GO:0005739]; protein-containing complex [GO:0032991]; blood vessel endothelial cell differentiation [GO:0060837]; cell-cell junction organization [GO:0045216]; endothelial cell development [GO:0001885]; endothelial tube morphogenesis [GO:0061154]; in utero embryonic development [GO:0001701]; inner ear development [GO:0048839]; multicellular organism growth [GO:0035264]; pericardium…	-	-	-	intron (XM_037988255.1, intron 4 of 7)	-1.88424	-	-	0.00343626	-	-	-	-	-	-	-	-	DMR	-	-
CCNA2	A0A0D9QUN1	Cyclin-A2	cyclin A2-CDK1 complex [GO:0097122]; cyclin A2-CDK2 complex [GO:0097124]; cytosol [GO:0005829]; female pronucleus [GO:0001939]; male pronucleus [GO:0001940]; nucleoplasm [GO:0005654]; cyclin-dependent protein serine/threonine kinase regulator activity [GO:0016538]; protein domain specific binding [GO:0019904]; protein kinase binding [GO:0019901]; cell cycle G1/S phase transition [GO:0044843]; cel…	-	-	-	-	-	-	-	-	-	-	-	-	-1.08089	-	-	0.0173836	-	-	DEG
CCNB1	A0A0D9RTK5	G2/mitotic-specific cyclin-B1	centrosome [GO:0005813]; cyclin B1-CDK1 complex [GO:0097125]; cytosol [GO:0005829]; membrane [GO:0016020]; mitochondrial matrix [GO:0005759]; nucleus [GO:0005634]; outer kinetochore [GO:0000940]; spindle pole [GO:0000922]; cyclin-dependent protein serine/threonine kinase activator activity [GO:0061575]; patched binding [GO:0005113]; protein kinase binding [GO:0019901]; ubiquitin-like protein liga…	Essential for the control of the cell cycle at the G2/M (mitosis) transition. {ECO:0000256|ARBA:ARBA00003222}.	-	-	-	-	-	-	-	-	-	-	-	-1.72922	-	-	5.62302e-05	-	-	DEG
CCNB2	A0A0D9RHX3	Cyclin B2	centrosome [GO:0005813]; cytosol [GO:0005829]; membrane [GO:0016020]; cyclin-dependent protein serine/threonine kinase regulator activity [GO:0016538]; cell division [GO:0051301]; G2/MI transition of meiotic cell cycle [GO:0008315]; in utero embryonic development [GO:0001701]; mitotic cell cycle phase transition [GO:0044772]; regulation of growth [GO:0040008]; spindle assembly involved in female …	-	-	GO:0002376~immune system process;GO:0002520~immune system development	-	-	-	-	-	-	-	-	-	-2.17174	-	-	0.00150695	-	-	DEG
CCND1	A0A0D9RA90	Cyclin D1	bicellular tight junction [GO:0005923]; cyclin D1-CDK4 complex [GO:0097128]; cyclin D1-CDK6 complex [GO:0097131]; cytoplasm [GO:0005737]; nucleoplasm [GO:0005654]; transcription repressor complex [GO:0017053]; cyclin-dependent protein serine/threonine kinase activator activity [GO:0061575]; histone deacetylase binding [GO:0042826]; proline-rich region binding [GO:0070064]; protein kinase activity…	-	-	-	exon (XM_008018194.2, exon 5 of 5)	1.1332	-	-	3.40833e-06	-	-	-	-	-	-	-	-	DMR	-	-
CCNE2	A0A0D9RJA8	Cyclin E2	cyclin E2-CDK2 complex [GO:0097135]; cyclin-dependent protein serine/threonine kinase regulator activity [GO:0016538]; cell division [GO:0051301]; DNA replication initiation [GO:0006270]; homologous chromosome pairing at meiosis [GO:0007129]; regulation of cell cycle [GO:0051726]; regulation of protein localization [GO:0032880]; telomere maintenance [GO:0000723]	-	-	-	-	-	-	-	-	-	-	-	1.34819	-	-	0.0191795	-	-	DEG	-
CCNI	-	-	-	-	-	-	-	-	-	-	-	-	-	-	-	-1.61938	-	-	0.00250409	-	-	DEG
CCNJL	A0A0D9RDD6	Cyclin J like	0	-	-	-	promoter-TSS (XM_038005280.1)	-	-1.52816	-	-	0.00089666	-	-	-	-	-	-	-	-	DMR	-
CCNL1	A0A0D9RI22	Cyclin L1	cyclin-dependent protein kinase holoenzyme complex [GO:0000307]; nuclear speck [GO:0016607]; cyclin-dependent protein serine/threonine kinase regulator activity [GO:0016538]; regulation of RNA splicing [GO:0043484]; regulation of transcription by RNA polymerase II [GO:0006357]	-	-	-	-	-	-	-	-	-	-	-	-	1.7019	-	-	6.04733e-05	-	-	DEG
CCNQ	A0A0D9R3N1	Cyclin-Q (Cyclin-related protein FAM58A)	cyclin-dependent protein kinase holoenzyme complex [GO:0000307]; cyclin-dependent protein serine/threonine kinase regulator activity [GO:0016538]; regulation of cell cycle G2/M phase transition [GO:1902749]; regulation of transcription by RNA polymerase II [GO:0006357]	-	-	-	exon (XM_007993063.2, exon 5 of 5)	-1.09449	-	-	9.11261e-20	-	-	-	-	-	-	-	-	DMR	-	-
CCT2	A0A0D9QW25	T-complex protein 1 subunit beta (CCT-beta)	cell body [GO:0044297]; chaperonin-containing T-complex [GO:0005832]; microtubule [GO:0005874]; zona pellucida receptor complex [GO:0002199]; ATP binding [GO:0005524]; ATP hydrolysis activity [GO:0016887]; ATP-dependent protein folding chaperone [GO:0140662]; ubiquitin protein ligase binding [GO:0031625]; unfolded protein binding [GO:0051082]; binding of sperm to zona pellucida [GO:0007339]; chap…	Component of the chaperonin-containing T-complex (TRiC), a molecular chaperone complex that assists the folding of proteins upon ATP hydrolysis. The TRiC complex mediates the folding of WRAP53/TCAB1, thereby regulating telomere maintenance. As part of the TRiC complex may play a role in the assembly of BBSome, a complex involved in ciliogenesis regulating transports vesicles to the cilia. The TRi…	-	-	promoter-TSS (XM_008003989.2)	1.28285	-	-	5.88278e-21	-	-	-	-	-	-	-	-	DMR	-	-
CCT3	A0A0D9S4W9	T-complex protein 1 subunit gamma	cell body [GO:0044297]; chaperonin-containing T-complex [GO:0005832]; microtubule [GO:0005874]; zona pellucida receptor complex [GO:0002199]; ATP binding [GO:0005524]; ATP hydrolysis activity [GO:0016887]; ATP-dependent protein folding chaperone [GO:0140662]; unfolded protein binding [GO:0051082]; binding of sperm to zona pellucida [GO:0007339]; chaperone mediated protein folding independent of c…	Component of the chaperonin-containing T-complex (TRiC), a molecular chaperone complex that assists the folding of proteins upon ATP hydrolysis. The TRiC complex mediates the folding of WRAP53/TCAB1, thereby regulating telomere maintenance. As part of the TRiC complex may play a role in the assembly of BBSome, a complex involved in ciliogenesis regulating transports vesicles to the cilia. The TRi…	-	-	exon (XM_007976768.2, exon 13 of 14)	-1.16757	-1.08702	-	6.94278e-08	1.25339e-05	-	-	-	-	-	-	-	DMR	DMR	-
CCT3	A0A0D9S4W9	T-complex protein 1 subunit gamma	cell body [GO:0044297]; chaperonin-containing T-complex [GO:0005832]; microtubule [GO:0005874]; zona pellucida receptor complex [GO:0002199]; ATP binding [GO:0005524]; ATP hydrolysis activity [GO:0016887]; ATP-dependent protein folding chaperone [GO:0140662]; unfolded protein binding [GO:0051082]; binding of sperm to zona pellucida [GO:0007339]; chaperone mediated protein folding independent of c…	Component of the chaperonin-containing T-complex (TRiC), a molecular chaperone complex that assists the folding of proteins upon ATP hydrolysis. The TRiC complex mediates the folding of WRAP53/TCAB1, thereby regulating telomere maintenance. As part of the TRiC complex may play a role in the assembly of BBSome, a complex involved in ciliogenesis regulating transports vesicles to the cilia. The TRi…	-	-	exon (XM_007976768.2, exon 14 of 14)	-1.12637	-	-	3.90996e-09	-	-	-	-	-	-	-	-	DMR	-	-
CCT8	A0A0D9R9Y5	T-complex protein 1 subunit theta (CCT-theta)	cell body [GO:0044297]; cell projection [GO:0042995]; centrosome [GO:0005813]; chaperonin-containing T-complex [GO:0005832]; intermediate filament cytoskeleton [GO:0045111]; microtubule [GO:0005874]; nucleoplasm [GO:0005654]; zona pellucida receptor complex [GO:0002199]; ATP binding [GO:0005524]; ATP hydrolysis activity [GO:0016887]; ATP-dependent protein folding chaperone [GO:0140662]; unfolded …	Component of the chaperonin-containing T-complex (TRiC), a molecular chaperone complex that assists the folding of proteins upon ATP hydrolysis. The TRiC complex mediates the folding of WRAP53/TCAB1, thereby regulating telomere maintenance. As part of the TRiC complex may play a role in the assembly of BBSome, a complex involved in ciliogenesis regulating transports vesicles to the cilia. The TRi…	-	-	exon (XM_007965666.2, exon 15 of 15)	-	1.13521	-	-	0.0236935	-	-	-	-	-	-	-	-	DMR	-
CD101	A0A0D9S641	CD101 molecule	membrane [GO:0016020]; hydrolase activity, acting on carbon-nitrogen (but not peptide) bonds, in cyclic amides [GO:0016812]; positive regulation of myeloid leukocyte differentiation [GO:0002763]	-	-	-	-	-	-	-	-	-	-	-	-	2.41831	-	-	0.0140768	-	-	DEG
CD109	A0A0D9RNK9	CD109 molecule	cytosol [GO:0005829]; extracellular space [GO:0005615]; plasma membrane [GO:0005886]; serine-type endopeptidase inhibitor activity [GO:0004867]; hair follicle development [GO:0001942]; keratinocyte proliferation [GO:0043616]; negative regulation of keratinocyte proliferation [GO:0010839]; negative regulation of stem cell proliferation [GO:2000647]; negative regulation of transforming growth facto…	-	-	-	TTS (XM_037987090.1)	-	1.20015	-	-	3.4512e-05	-	-	-	-1.63562	-	-	4.59886e-05	-	DMR	DEG
CD151	A0A0D9RDR7	Tetraspanin	basement membrane [GO:0005604]; cell surface [GO:0009986]; plasma membrane [GO:0005886]; integrin binding [GO:0005178]; positive regulation of cell migration [GO:0030335]; positive regulation of endocytosis [GO:0045807]; T cell proliferation [GO:0042098]; wound healing, spreading of cells [GO:0044319]	-	-	GO:0002376~immune system process	-	-	-	-	-	-	-	-	-	-2.16612	-	-	0.00113483	-	-	DEG
CD164	A0A0D9RS23	CD164 molecule	endosome [GO:0005768]; lysosome [GO:0005764]; plasma membrane [GO:0005886]; heterophilic cell-cell adhesion via plasma membrane cell adhesion molecules [GO:0007157]	-	-	-	-	-	-	-	-	-	-	-	-	-1.39173	-	-	0.00422133	-	-	DEG
CD24	-	-	-	-	-	-	-	-	-	-	-	-	-	-	-	-4.1982	-	-	2.34298e-05	-	-	DEG
CD276	-	-	-	-	-	-	-	-	-	-	-	-	-	-	-	-1.46235	-	-	0.0114192	-	-	DEG
CD46	A0A0D9RRP8	Membrane cofactor protein	cell surface [GO:0009986]; extracellular region [GO:0005576]; inner acrosomal membrane [GO:0002079]; plasma membrane [GO:0005886]; cadherin binding [GO:0045296]; complement activation, classical pathway [GO:0006958]; negative regulation of gene expression [GO:0010629]; positive regulation of interleukin-10 production [GO:0032733]; positive regulation of memory T cell differentiation [GO:0043382];…	Acts as a cofactor for complement factor I, a serine protease which protects autologous cells against complement-mediated injury by cleaving C3b and C4b deposited on host tissue. May be involved in the fusion of the spermatozoa with the oocyte during fertilization. Also acts as a costimulatory factor for T-cells which induces the differentiation of CD4+ into T-regulatory 1 cells. T-regulatory 1 c…	-	-	-	-	-	-	-	-	-	-	-	-1.18177	-	-	0.0280243	-	-	DEG
CD59	A0A0D9QZ73	CD59 glycoprotein (MAC-inhibitory protein) (Membrane attack complex inhibition factor) (Protectin)	external side of plasma membrane [GO:0009897]; complement binding [GO:0001848]; negative regulation of activation of membrane attack complex [GO:0001971]; regulation of complement-dependent cytotoxicity [GO:1903659]	-	-	GO:0006959~humoral immune response;GO:0002252~immune effector process;GO:0050778~positive regulation of immune response;GO:0002253~activation of immune response;GO:0002697~regulation of immune effector process;GO:0002698~negative regulation of immune effector process;GO:0050777~negative regulation of immune response	-	-	-	-	-	-	-	-	-	-1.67828	-	-	1.12623e-09	-	-	DEG
CD68	A0A0D9RGA6	CD68 molecule	late endosome membrane [GO:0031902]; lysosomal membrane [GO:0005765]; plasma membrane [GO:0005886]; establishment of protein localization to organelle [GO:0072594]	-	-	-	-	-	-	-	-	-	-	-	-	-1.44656	-	-	0.0248749	-	-	DEG
CD81	A0A0D9RBI8	Tetraspanin	basolateral plasma membrane [GO:0016323]; extracellular exosome [GO:0070062]; immunological synapse [GO:0001772]; tetraspanin-enriched microdomain [GO:0097197]; cholesterol binding [GO:0015485]; integrin binding [GO:0005178]; MHC class II protein binding [GO:0042289]; transferrin receptor binding [GO:1990459]; virus receptor activity [GO:0001618]; CD4-positive, alpha-beta T cell costimulation [GO…	-	-	GO:0002682~regulation of immune system process;GO:0002376~immune system process;GO:0002684~positive regulation of immune system process;GO:0006955~immune response;GO:0002456~T cell mediated immunity;GO:0002705~positive regulation of leukocyte mediated immunity;GO:0002708~positive regulation of lymphocyte mediated immunity;GO:0001618~virus receptor activity;GO:0006959~humoral immune response;GO:00…	-	-	-	-	-	-	-	-	-	-1.99385	-	-	0.00348131	-	-	DEG
CD82	A0A0D9QZU3	Tetraspanin	plasma membrane [GO:0005886]	-	-	-	-	-	-	-	-	-	-	-	-	-2.23494	-	-	2.27079e-05	-	-	DEG
CD83	A0A0D9R5D4	CD83 molecule	external side of plasma membrane [GO:0009897]; CD4-positive, alpha-beta T cell differentiation [GO:0043367]; negative regulation of interleukin-4 production [GO:0032713]; positive regulation of CD4-positive, alpha-beta T cell differentiation [GO:0043372]; positive regulation of interleukin-10 production [GO:0032733]; positive regulation of interleukin-2 production [GO:0032743]; response to organi…	-	-	GO:0002520~immune system development	exon (XM_007973640.2, exon 5 of 5)	-1.08069	-	-	0.002905	-	-	-	-	-	-	-	-	DMR	-	-
CD9	A0A0D9RED0	Tetraspanin	external side of plasma membrane [GO:0009897]; extracellular exosome [GO:0070062]; protein-containing complex [GO:0032991]; integrin binding [GO:0005178]; cell adhesion [GO:0007155]; cell population proliferation [GO:0008283]; cellular response to low-density lipoprotein particle stimulus [GO:0071404]; fusion of sperm to egg plasma membrane involved in single fertilization [GO:0007342]; glial cel…	-	-	-	-	-	-	-	-	-	-	-	-	-1.79969	-	-	0.000293474	-	-	DEG
CDAN1	A0A0D9R928	Codanin 1	cytosol [GO:0005829]; endomembrane system [GO:0012505]; nucleus [GO:0005634]; plasma membrane [GO:0005886]; chromatin organization [GO:0006325]; import into nucleus [GO:0051170]; protein localization [GO:0008104]	-	-	-	-	-	-	-	-	-	-	-	-	1.14086	-	-	0.0431209	-	-	DEG
CDC16	A0A0D9RXT5	Cell division cycle 16	anaphase-promoting complex [GO:0005680]; centrosome [GO:0005813]; cytoplasm [GO:0005737]; mitotic spindle [GO:0072686]; anaphase-promoting complex-dependent catabolic process [GO:0031145]; cell division [GO:0051301]; positive regulation of mitotic metaphase/anaphase transition [GO:0045842]; protein branched polyubiquitination [GO:0141198]; protein K11-linked ubiquitination [GO:0070979]; protein K…	-	-	-	intron (XR_489849.2, intron 12 of 18)	1.00392	-	-	0.0247542	-	-	-	-	-	-	-	-	DMR	-	-
CDC20	A0A0D9S7J3	Cell division cycle 20	anaphase-promoting complex [GO:0005680]; centrosome [GO:0005813]; cytosol [GO:0005829]; kinetochore [GO:0000776]; mitotic checkpoint complex [GO:0033597]; nucleoplasm [GO:0005654]; anaphase-promoting complex binding [GO:0010997]; ubiquitin ligase activator activity [GO:1990757]; ubiquitin-like ligase-substrate adaptor activity [GO:1990756]; anaphase-promoting complex-dependent catabolic process […	-	-	-	-	-	-	-	-	-	-	-	-	-3.30554	-	-	6.21945e-15	-	-	DEG
CDC25B	A0A0D9RKK0	M-phase inducer phosphatase (EC 3.1.3.48)	centrosome [GO:0005813]; cytoplasm [GO:0005737]; nucleus [GO:0005634]; spindle pole [GO:0000922]; histone H2AXY142 phosphatase activity [GO:0140793]; non-membrane spanning protein tyrosine phosphatase activity [GO:0004726]; protein kinase binding [GO:0019901]; protein tyrosine phosphatase activity, metal-dependent [GO:0030946]; cell division [GO:0051301]; female meiosis I [GO:0007144]; G2/M trans…	Tyrosine protein phosphatase which functions as a dosage-dependent inducer of mitotic progression. {ECO:0000256|RuleBase:RU368028}.	-	-	-	-	-	-	-	-	-	-	-	-1.93257	-	-	0.000146353	-	-	DEG
CDC26	A0A0D9RJ08	Anaphase-promoting complex subunit CDC26 (Cell division cycle protein 26 homolog)	anaphase-promoting complex [GO:0005680]; anaphase-promoting complex-dependent catabolic process [GO:0031145]; cell division [GO:0051301]; protein branched polyubiquitination [GO:0141198]; protein K11-linked ubiquitination [GO:0070979]; protein K48-linked ubiquitination [GO:0070936]; regulation of mitotic cell cycle [GO:0007346]	Component of the anaphase promoting complex/cyclosome (APC/C), a cell cycle-regulated E3 ubiquitin ligase that controls progression through mitosis and the G1 phase of the cell cycle. The APC/C complex acts by mediating ubiquitination and subsequent degradation of target proteins: it mainly mediates the formation of 'Lys-11'-linked polyubiquitin chains and, to a lower extent, the formation of 'Ly…	-	-	exon (XM_007968370.2, exon 4 of 4)	-	1.67632	-	-	0.00116694	-	-	-	-	-	-	-	-	DMR	-
CDC27	A0A0D9QUY6	Cell division cycle protein 27 homolog	anaphase-promoting complex [GO:0005680]; centrosome [GO:0005813]; cytoplasm [GO:0005737]; mitotic spindle [GO:0072686]; nucleoplasm [GO:0005654]; protein phosphatase binding [GO:0019903]; anaphase-promoting complex-dependent catabolic process [GO:0031145]; cell division [GO:0051301]; metaphase/anaphase transition of mitotic cell cycle [GO:0007091]; protein branched polyubiquitination [GO:0141198]…	-	-	-	exon (XM_008012275.2, exon 15 of 19)	1.27849	-	-	0.000214826	-	-	-	-	-	-	-	-	DMR	-	-
CDC27	A0A0D9QUY6	Cell division cycle protein 27 homolog	anaphase-promoting complex [GO:0005680]; centrosome [GO:0005813]; cytoplasm [GO:0005737]; mitotic spindle [GO:0072686]; nucleoplasm [GO:0005654]; protein phosphatase binding [GO:0019903]; anaphase-promoting complex-dependent catabolic process [GO:0031145]; cell division [GO:0051301]; metaphase/anaphase transition of mitotic cell cycle [GO:0007091]; protein branched polyubiquitination [GO:0141198]…	-	-	-	TTS (XM_008012276.2)	1.06122	1.01542	-	0.000385571	7.60139e-05	-	-	-	-	-	-	-	DMR	DMR	-
CDC34	A0A0D9RKS4	Cell division cycle 34, ubiqiutin conjugating enzyme	cytosol [GO:0005829]; nuclear speck [GO:0016607]; ATP binding [GO:0005524]; ubiquitin conjugating enzyme activity [GO:0061631]; cellular response to interferon-beta [GO:0035458]; proteasome-mediated ubiquitin-dependent protein catabolic process [GO:0043161]; protein K48-linked ubiquitination [GO:0070936]	-	-	-	exon (XM_007994557.2, exon 3 of 5)	-1.80961	-	-	1.35021e-28	-	-	-	-	-	-	-	-	DMR	-	-
CDC34	A0A0D9RKS4	Cell division cycle 34, ubiqiutin conjugating enzyme	cytosol [GO:0005829]; nuclear speck [GO:0016607]; ATP binding [GO:0005524]; ubiquitin conjugating enzyme activity [GO:0061631]; cellular response to interferon-beta [GO:0035458]; proteasome-mediated ubiquitin-dependent protein catabolic process [GO:0043161]; protein K48-linked ubiquitination [GO:0070936]	-	-	-	exon (XM_007994557.2, exon 5 of 5)	-1.52689	-	-	1.9746e-08	-	-	-	-	-	-	-	-	DMR	-	-
CDC37	A0A0D9R4G5	Hsp90 co-chaperone Cdc37 (Hsp90 chaperone protein kinase-targeting subunit) [Cleaved into: Hsp90 co-chaperone Cdc37, N-terminally processed]	cytosol [GO:0005829]; HSP90-CDC37 chaperone complex [GO:1990565]; Hsp90 protein binding [GO:0051879]; protein kinase binding [GO:0019901]; protein kinase regulator activity [GO:0019887]; protein-folding chaperone binding [GO:0051087]; scaffold protein binding [GO:0097110]; unfolded protein binding [GO:0051082]; positive regulation of type 2 mitophagy [GO:1905091]; post-transcriptional regulation …	Co-chaperone that binds to numerous kinases and promotes their interaction with the Hsp90 complex, resulting in stabilization and promotion of their activity. {ECO:0000256|RuleBase:RU369110}.	-	-	-	-	-	-	-	-	-	-	-	-1.09131	-	-	0.00976826	-	-	DEG
CDC37L1	A0A0D9R8V8	Hsp90 co-chaperone Cdc37-like 1	cytosol [GO:0005829]; heat shock protein binding [GO:0031072]; protein-folding chaperone binding [GO:0051087]; unfolded protein binding [GO:0051082]; protein folding [GO:0006457]; protein stabilization [GO:0050821]	Co-chaperone that binds to numerous proteins and promotes their interaction with Hsp70 and Hsp90. {ECO:0000256|ARBA:ARBA00037145}.	-	-	exon (XM_007969349.2, exon 7 of 7)	-	1.03634	-	-	0.0143901	-	-	-	-	-	-	-	-	DMR	-
CDC40	A0A0D9RSF3	Cell division cycle 40	nuclear speck [GO:0016607]; U2-type catalytic step 2 spliceosome [GO:0071007]; mRNA binding [GO:0003729]; embryonic brain development [GO:1990403]; mRNA splicing, via spliceosome [GO:0000398]	-	-	-	exon (XM_038001018.1, exon 12 of 15)	1.16421	-	-	0.00364839	-	-	-	-	-	-	-	-	DMR	-	-
CDC42EP2	A0A0D9SCU3	CDC42 effector protein 2	cytosol [GO:0005829]; endomembrane system [GO:0012505]; microtubule cytoskeleton [GO:0015630]; phagocytic vesicle [GO:0045335]; plasma membrane [GO:0005886]; GTPase activator activity [GO:0005096]; opioid peptide activity [GO:0001515]; small GTPase binding [GO:0031267]; actin cytoskeleton organization [GO:0030036]; cellular response to type II interferon [GO:0071346]; positive regulation of actin…	-	-	GO:0045087~innate immune response	exon (XM_007987790.2, exon 2 of 2)	-	1.13379	-	-	0.00369287	-	-	-	1.48387	-	-	0.00508478	-	DMR	DEG
CDC42EP3	A0A0D9SDM6	CDC42 effector protein 3	actin cytoskeleton [GO:0015629]; cytoplasm [GO:0005737]; endomembrane system [GO:0012505]; plasma membrane [GO:0005886]; small GTPase binding [GO:0031267]; positive regulation of actin filament polymerization [GO:0030838]; positive regulation of pseudopodium assembly [GO:0031274]; regulation of cell shape [GO:0008360]; Rho protein signal transduction [GO:0007266]	-	-	-	-	-	-	-	-	-	-	-	1.18268	-	-	0.00434534	-	-	DEG	-
CDC73	A0A0D9RLU4	Cell division cycle 73	Cdc73/Paf1 complex [GO:0016593]; cytosol [GO:0005829]; RNA polymerase II complex binding [GO:0000993]; cellular response to lipopolysaccharide [GO:0071222]; endodermal cell fate commitment [GO:0001711]; mRNA 3'-end processing [GO:0031124]; negative regulation of apoptotic process [GO:0043066]; negative regulation of epithelial cell proliferation [GO:0050680]; negative regulation of fibroblast pro…	-	-	GO:0002520~immune system development;GO:0002376~immune system process;GO:0002682~regulation of immune system process;GO:0002520~immune system development;GO:0002682~regulation of immune system process;GO:0002376~immune system process	TTS (XM_037985782.1)	-	1.99464	-	-	5.69583e-06	-	-	-	-	-	-	-	-	DMR	-
CDCA7	A0A0D9RQC6	Cell division cycle associated 7	cytosol [GO:0005829]; nucleoplasm [GO:0005654]; regulation of cell population proliferation [GO:0042127]	-	-	-	exon (XM_038001915.1, exon 10 of 10)	2.25542	1.19598	-	7.03819e-07	2.2228e-07	-	-	1.37205	-	-	0.00949507	-	DMR	DMEG	-
CDCA7L	A0A0D9RN46	Cell division cycle associated 7 like	cytosol [GO:0005829]; fibrillar center [GO:0001650]; nucleoplasm [GO:0005654]; positive regulation of cell population proliferation [GO:0008284]; regulation of DNA-templated transcription [GO:0006355]	-	-	-	-	-	-	-	-	-	-	-	-	-1.29718	-	-	0.0281292	-	-	DEG
CDCA8	A0A0D9S7R1	Borealin (Cell division cycle-associated protein 8)	chromocenter [GO:0010369]; chromosome passenger complex [GO:0032133]; chromosome, centromeric region [GO:0000775]; intercellular bridge [GO:0045171]; midbody [GO:0030496]; nucleolus [GO:0005730]; nucleoplasm [GO:0005654]; spindle midzone [GO:0051233]; cell division [GO:0051301]; mitotic metaphase chromosome alignment [GO:0007080]	-	-	-	-	-	-	-	-	-	-	-	-	-1.23012	-	-	0.0164438	-	-	DEG
CDH2	A0A0D9RZ03	Cadherin-2 (Neural cadherin)	adherens junction [GO:0005912]; apical plasma membrane [GO:0016324]; apicolateral plasma membrane [GO:0016327]; basolateral plasma membrane [GO:0016323]; catenin complex [GO:0016342]; cell surface [GO:0009986]; cortical actin cytoskeleton [GO:0030864]; desmosome [GO:0030057]; fascia adherens [GO:0005916]; lamellipodium [GO:0030027]; neuron projection [GO:0043005]; plasma membrane raft [GO:0044853…	Cadherins are calcium-dependent cell adhesion proteins. {ECO:0000256|RuleBase:RU004357}.; Calcium-dependent cell adhesion protein; preferentially mediates homotypic cell-cell adhesion by dimerization with a CDH2 chain from another cell. Cadherins may thus contribute to the sorting of heterogeneous cell types. Acts as a regulator of neural stem cells quiescence by mediating anchorage of neural ste…	-	-	exon (XM_007974381.2, exon 6 of 16)	1.14658	-	-	2.17207e-11	-	-	-	-	-1.5381	-	-	0.00831683	DMR	-	DEG
CDHR2	A0A0D9RA47	Cadherin related family member 2	apical plasma membrane [GO:0016324]; brush border membrane [GO:0031526]; cell-cell junction [GO:0005911]; microvillus membrane [GO:0031528]; calcium ion binding [GO:0005509]; cell adhesion molecule binding [GO:0050839]; cell-cell adhesion mediated by cadherin [GO:0044331]; epithelial cell differentiation [GO:0030855]; homophilic cell adhesion via plasma membrane adhesion molecules [GO:0007156]; i…	-	-	-	exon (XM_008015383.2, exon 19 of 32)	-	1.64204	-	-	0.0226614	-	-	-	-	-	-	-	-	DMR	-
CDIPT	-	-	-	-	-	-	-	-	-	-	-	-	-	-	-	-1.66004	-	-	0.00207563	-	-	DEG
CDK1	-	-	-	-	-	-	-	-	-	-	-	-	-	-	-	-1.32412	-	-	0.00648652	-	-	DEG
CDK18	A0A0D9RQ71	Cyclin dependent kinase 18	cytoplasm [GO:0005737]; nucleus [GO:0005634]; ATP binding [GO:0005524]; cyclin-dependent protein serine/threonine kinase activity [GO:0004693]; positive regulation of myelination [GO:0031643]	-	-	-	-	-	-	-	-	-	-	-	-	1.37769	-	-	0.000970572	-	-	DEG
CDK2AP1	A0A0D9S531	Cyclin-dependent kinase 2-associated protein	cytosol [GO:0005829]; NuRD complex [GO:0016581]; perinuclear region of cytoplasm [GO:0048471]; DNA polymerase binding [GO:0070182]; regulation of transcription by RNA polymerase II [GO:0006357]	-	-	-	-	-	-	-	-	-	-	-	-	-2.00089	-	-	0.000186587	-	-	DEG
CDK2AP2	A0A0D9R8I9	Cyclin dependent kinase 2 associated protein 2	cytoplasm [GO:0005737]; microtubule [GO:0005874]; NuRD complex [GO:0016581]; negative regulation of G1/S transition of mitotic cell cycle [GO:2000134]; regulation of microtubule cytoskeleton organization [GO:0070507]; regulation of stem cell division [GO:2000035]	-	-	-	exon (XM_007964712.2, exon 3 of 4)	-	-1.17837	-	-	1.64861e-05	-	-	-	-2.17321	-	-	0.000728377	-	DMR	DEG
CDK4	A0A0D9QX74	Cyclin-dependent kinase 4 (EC 2.7.11.22) (Cell division protein kinase 4)	bicellular tight junction [GO:0005923]; chromatin [GO:0000785]; cyclin D1-CDK4 complex [GO:0097128]; cyclin D2-CDK4 complex [GO:0097129]; cyclin D3-CDK4 complex [GO:0097130]; cytosol [GO:0005829]; nuclear membrane [GO:0031965]; nucleolus [GO:0005730]; nucleoplasm [GO:0005654]; transcription regulator complex [GO:0005667]; ATP binding [GO:0005524]; cyclin binding [GO:0030332]; cyclin-dependent pro…	-	-	-	-	-	-	-	-	-	-	-	-	-1.86064	-	-	0.00114466	-	-	DEG
CDK5	-	-	-	-	-	-	-	-	-	-	-	-	-	-	-	-1.7118	-	-	0.00017609	-	-	DEG
CDK6	A0A0D9RJK6	Cyclin dependent kinase 6	centrosome [GO:0005813]; cyclin D1-CDK6 complex [GO:0097131]; cyclin D3-CDK6 complex [GO:0097133]; cytosol [GO:0005829]; nucleoplasm [GO:0005654]; ruffle [GO:0001726]; ATP binding [GO:0005524]; cyclin binding [GO:0030332]; cyclin-dependent protein serine/threonine kinase activity [GO:0004693]; FBXO family protein binding [GO:0098770]; cell dedifferentiation [GO:0043697]; G1/S transition of mitoti…	-	-	GO:0009615~response to virus	-	-	-	-	-	-	-	-	-	-1.62238	-	-	0.000119492	-	-	DEG
CDKL3	A0A0D9RMC2	Cyclin dependent kinase like 3	nucleus [GO:0005634]; ATP binding [GO:0005524]; protein serine/threonine kinase activity [GO:0004674]; dendrite extension [GO:0097484]; negative regulation of axon extension [GO:0030517]; positive regulation of dendrite morphogenesis [GO:0050775]	-	-	-	-	-	-	-	-	-	-	-	-	1.99162	-	-	0.000428535	-	-	DEG
CDKL5	A0A0D9RQF6	Cyclin dependent kinase like 5	centrosome [GO:0005813]; ciliary basal body [GO:0036064]; ciliary tip [GO:0097542]; dendrite cytoplasm [GO:0032839]; glutamatergic synapse [GO:0098978]; nucleoplasm [GO:0005654]; ATP binding [GO:0005524]; protein serine/threonine kinase activity [GO:0004674]; modulation of chemical synaptic transmission [GO:0050804]; positive regulation of axon extension [GO:0045773]; regulation of cilium assembl…	-	-	-	-	-	-	-	-	-	-	-	-	-1.1829	-	-	0.0167506	-	-	DEG
CDKN1B	A0A0D9R8A8	Cyclin-dependent kinase inhibitor 1B (Cyclin-dependent kinase inhibitor p27) (p27Kip1)	Cul4A-RING E3 ubiquitin ligase complex [GO:0031464]; cytosol [GO:0005829]; endosome [GO:0005768]; nucleoplasm [GO:0005654]; cyclin binding [GO:0030332]; cyclin-dependent protein serine/threonine kinase inhibitor activity [GO:0004861]; protein kinase binding [GO:0019901]; protein phosphatase binding [GO:0019903]; protein-containing complex binding [GO:0044877]; protein-folding chaperone binding [G…	Important regulator of cell cycle progression. Inhibits the kinase activity of CDK2 bound to cyclin A, but has little inhibitory activity on CDK2 bound to SPDYA. Involved in G1 arrest. Potent inhibitor of cyclin E- and cyclin A-CDK2 complexes. Forms a complex with cyclin type D-CDK4 complexes and is involved in the assembly, stability, and modulation of CCND1-CDK4 complex activation. Acts either …	-	-	-	-	-	-	-	-	-	-	-	1.0947	-	-	0.0310303	-	-	DEG
CDKN2AIPNL	A0A0D9RMB2	CDKN2A interacting protein N-terminal like	0	-	-	-	-	-	-	-	-	-	-	-	-	-2.00233	-	-	0.000411985	-	-	DEG
CDKN3	A0A0D9RQQ6	Cyclin-dependent kinase inhibitor 3 (EC 3.1.3.16) (EC 3.1.3.48)	cytosol [GO:0005829]; perinuclear region of cytoplasm [GO:0048471]; calmodulin-dependent protein phosphatase activity [GO:0033192]; histone H2AXS140 phosphatase activity [GO:0140791]; histone H2AXY142 phosphatase activity [GO:0140793]; MAP kinase serine/threonine phosphatase activity [GO:1990439]; myosin phosphatase activity [GO:0017018]; non-membrane spanning protein tyrosine phosphatase activit…	May play a role in cell cycle regulation. Dual specificity phosphatase active toward substrates containing either phosphotyrosine or phosphoserine residues. {ECO:0000256|PIRNR:PIRNR037322}.	-	-	-	-	-	-	-	-	-	-	-	-2.13887	-	-	0.0227233	-	-	DEG
CDR2	A0A0D9R3W6	Cerebellar degeneration related protein 2	cytoplasm [GO:0005737]	-	-	-	-	-	-	-	-	-	-	-	-	-2.71639	-	-	3.44047e-13	-	-	DEG
CDR2L	A0A0D9QX94	Cerebellar degeneration related protein 2 like	identical protein binding [GO:0042802]	-	-	-	exon (XM_008011802.2, exon 5 of 5)	1.24396	-	-	0.00442007	-	-	-	-	-	-	-	-	DMR	-	-
CDS2	A0A0D9RLS9	Phosphatidate cytidylyltransferase (EC 2.7.7.41)	endoplasmic reticulum membrane [GO:0005789]; phosphatidate cytidylyltransferase activity [GO:0004605]; CDP-diacylglycerol biosynthetic process [GO:0016024]; lipid droplet formation [GO:0140042]	Catalyzes the conversion of phosphatidic acid (PA) to CDP-diacylglycerol (CDP-DAG), an essential intermediate in the synthesis of phosphatidylglycerol, cardiolipin and phosphatidylinositol. {ECO:0000256|PIRNR:PIRNR018269}.	-	-	-	-	-	-	-	-	-	-	-	-1.06601	-	-	0.000265776	-	-	DEG
CDYL	A0A0D9R4M9	Chromodomain Y like	chromosome [GO:0005694]; cytoplasm [GO:0005737]; nuclear speck [GO:0016607]; chromatin binding [GO:0003682]; crotonyl-CoA hydratase activity [GO:0120092]; methylated histone binding [GO:0035064]; transcription corepressor activity [GO:0003714]; negative regulation of peptidyl-lysine crotonylation [GO:0120094]; random inactivation of X chromosome [GO:0060816]; spermatid development [GO:0007286]	-	-	-	exon (XM_007973803.2, exon 2 of 7)	-1.02341	-	-	4.21134e-14	-	-	-	-	-	-	-	-	DMR	-	-
CDYL2	A0A0D9S0T2	Chromodomain Y like 2	nucleus [GO:0005634]; methylated histone binding [GO:0035064]; transcription corepressor activity [GO:0003714]	-	-	-	-	-	-	-	-	-	-	-	-	1.16498	-	-	0.00944875	-	-	DEG
CEACAM19	A0A0D9S1N7	CEA cell adhesion molecule 19	membrane [GO:0016020]	-	-	-	-	-	-	-	-	-	-	-	-	3.58518	-	-	6.26987e-09	-	-	DEG
CEBPB	A0A0D9SBM9	CCAAT/enhancer-binding protein	C/EBP complex [GO:1990647]; CHOP-C/EBP complex [GO:0036488]; chromatin [GO:0000785]; condensed chromosome, centromeric region [GO:0000779]; cytoplasm [GO:0005737]; nuclear matrix [GO:0016363]; nucleoplasm [GO:0005654]; chromatin DNA binding [GO:0031490]; DNA-binding transcription activator activity, RNA polymerase II-specific [GO:0001228]; histone acetyltransferase binding [GO:0035035]; histone d…	-	-	GO:0002520~immune system development;GO:0002683~negative regulation of immune system process	exon (XM_008014278.2, exon 1 of 1)	-1.17248	-	-	1.02313e-13	-	-	-	-	-	-	-	-	DMR	-	-
CEBPD	-	-	-	-	-	-	exon (XM_008000561.2, exon 1 of 1)	-	1.92775	-	-	5.34376e-05	-	-	-1.75385	-2.32645	-	0.0177011	0.0052125	-	DMEG	DEG
CEL	A0A0D9RR87	Carboxylic ester hydrolase (EC 3.1.1.-)	membrane [GO:0016020]; cholinesterase activity [GO:0004104]; ceramide catabolic process [GO:0046514]; intestinal cholesterol absorption [GO:0030299]; pancreatic juice secretion [GO:0030157]	-	-	-	-	-	-	-	-	-	-	-	-	3.19846	-	-	0.00297293	-	-	DEG
CELF6	A0A0D9RMS3	CUGBP Elav-like family member 6	cytoplasm [GO:0005737]; nucleus [GO:0005634]; RNA binding [GO:0003723]; mRNA processing [GO:0006397]; regulation of alternative mRNA splicing, via spliceosome [GO:0000381]	-	-	-	-	-	-	-	-	-	-	-	-	2.71489	-	-	0.0149849	-	-	DEG
CELSR2	A0A0D9S6J7	Cadherin EGF LAG seven-pass G-type receptor 2	cytoplasm [GO:0005737]; plasma membrane [GO:0005886]; calcium ion binding [GO:0005509]; G protein-coupled receptor activity [GO:0004930]; cerebrospinal fluid secretion [GO:0033326]; cilium assembly [GO:0060271]; cilium movement [GO:0003341]; homophilic cell adhesion via plasma membrane adhesion molecules [GO:0007156]; motor neuron migration [GO:0097475]; neural plate anterior/posterior regionaliz…	Receptor that may have an important role in cell/cell signaling during nervous system formation. {ECO:0000256|ARBA:ARBA00002066}.	-	-	-	-	-	-	-	-	-	-	-	-1.04691	-	-	0.0107341	-	-	DEG
CEMIP2	A0A0D9R7H2	hyaluronoglucosaminidase (EC 3.2.1.35)	cytosol [GO:0005829]; nucleolus [GO:0005730]; plasma membrane [GO:0005886]; calcium ion binding [GO:0005509]; carbohydrate binding [GO:0030246]; hyalurononglucosaminidase activity [GO:0004415]; hyaluronan catabolic process [GO:0030214]	-	-	-	exon (XM_007969485.2, exon 2 of 24)	1.0443	-	-	3.628e-10	-	-	-	-	-	-	-	-	DMR	-	-
CEMIP2	A0A0D9R7H2	hyaluronoglucosaminidase (EC 3.2.1.35)	cytosol [GO:0005829]; nucleolus [GO:0005730]; plasma membrane [GO:0005886]; calcium ion binding [GO:0005509]; carbohydrate binding [GO:0030246]; hyalurononglucosaminidase activity [GO:0004415]; hyaluronan catabolic process [GO:0030214]	-	-	-	exon (XM_007969485.2, exon 23 of 24)	2.23773	-	-	4.27853e-16	-	-	-	-	-	-	-	-	DMR	-	-
CEMIP2	A0A0D9R7H2	hyaluronoglucosaminidase (EC 3.2.1.35)	cytosol [GO:0005829]; nucleolus [GO:0005730]; plasma membrane [GO:0005886]; calcium ion binding [GO:0005509]; carbohydrate binding [GO:0030246]; hyalurononglucosaminidase activity [GO:0004415]; hyaluronan catabolic process [GO:0030214]	-	-	-	exon (XM_007969485.2, exon 6 of 24)	1.342	-	-	9.58884e-07	-	-	-	-	-	-	-	-	DMR	-	-
CENPA	A0A0D9RAA4	Centromere protein A	CENP-A containing nucleosome [GO:0043505]; condensed chromosome, centromeric region [GO:0000779]; nucleoplasm [GO:0005654]; pericentric heterochromatin [GO:0005721]; DNA binding [GO:0003677]; protein heterodimerization activity [GO:0046982]; structural constituent of chromatin [GO:0030527]; CENP-A containing chromatin assembly [GO:0034080]; establishment of mitotic spindle orientation [GO:0000132…	-	-	-	-	-	-	-	-	-	-	-	-	-2.31213	-	-	0.000115709	-	-	DEG
CENPC	A0A0D9QYT1	Centromere protein C	inner kinetochore [GO:0000939]; midbody [GO:0030496]; nuclear body [GO:0016604]; pericentric heterochromatin [GO:0005721]; centromeric DNA binding [GO:0019237]; identical protein binding [GO:0042802]; attachment of mitotic spindle microtubules to kinetochore [GO:0051315]; kinetochore assembly [GO:0051382]; spindle attachment to meiosis I kinetochore [GO:0051455]	-	-	-	exon (XM_007998583.2, exon 8 of 19)	1.10074	-	-	4.44458e-08	-	-	-	-	-	-	-	-	DMR	-	-
CENPE	-	-	-	-	-	-	-	-	-	-	-	-	-	-	-	-1.36184	-	-	0.0279697	-	-	DEG
CENPF	A0A0D9RSQ0	Centromere protein F	axoneme [GO:0005930]; centrosome [GO:0005813]; ciliary basal body [GO:0036064]; ciliary transition fiber [GO:0097539]; cytosol [GO:0005829]; midbody [GO:0030496]; nuclear matrix [GO:0016363]; nuclear membrane [GO:0031965]; nucleoplasm [GO:0005654]; outer kinetochore [GO:0000940]; pronucleus [GO:0045120]; spindle pole [GO:0000922]; DNA-binding transcription factor binding [GO:0140297]; dynein comp…	-	-	-	-	-	-	-	-	-	-	-	-	-1.90162	-	-	3.09467e-06	-	-	DEG
CENPN	A0A0D9S0T8	Centromere protein N	inner kinetochore [GO:0000939]; nucleoplasm [GO:0005654]; CENP-A containing chromatin assembly [GO:0034080]; chromosome segregation [GO:0007059]	-	-	-	promoter-TSS (XM_007994169.2)	1.21767	-	-	2.93314e-12	-	-	-	-	-	-	-	-	DMR	-	-
CENPS	A0A0D9S8N8	Centromere protein S	chromatin [GO:0000785]; FANCM-MHF complex [GO:0071821]; Fanconi anaemia nuclear complex [GO:0043240]; inner kinetochore [GO:0000939]; chromatin binding [GO:0003682]; double-stranded DNA binding [GO:0003690]; protein heterodimerization activity [GO:0046982]; interstrand cross-link repair [GO:0036297]; replication fork processing [GO:0031297]; resolution of meiotic recombination intermediates [GO:0…	-	-	-	-	-	-	-	-	-	-	-	-	-1.62825	-	-	0.0212129	-	-	DEG
CENPV	A0A0D9R8V0	Centromere protein V	cytosol [GO:0005829]; kinetochore [GO:0000776]; midbody [GO:0030496]; nuclear membrane [GO:0031965]; nucleoplasm [GO:0005654]; spindle midzone [GO:0051233]; carbon-sulfur lyase activity [GO:0016846]; metal ion binding [GO:0046872]; ameboidal-type cell migration [GO:0001667]; centromere complex assembly [GO:0034508]; pericentric heterochromatin formation [GO:0031508]; positive regulation of cytoki…	-	-	-	-	-	-	-	-	-	-	-	-	-1.37489	-	-	0.0404774	-	-	DEG
CENPW	A0A0D9RUW9	Centromere protein W	inner kinetochore [GO:0000939]; nucleoplasm [GO:0005654]; DNA binding [GO:0003677]; protein heterodimerization activity [GO:0046982]; chromosome segregation [GO:0007059]; kinetochore assembly [GO:0051382]; mitotic cell cycle [GO:0000278]	-	-	-	-	-	-	-	-	-	-	-	-	-1.7305	-	-	1.72456e-05	-	-	DEG
CENPX	A0A0D9S4S4	Centromere protein X	chromatin [GO:0000785]; FANCM-MHF complex [GO:0071821]; Fanconi anaemia nuclear complex [GO:0043240]; inner kinetochore [GO:0000939]; double-stranded DNA binding [GO:0003690]; protein heterodimerization activity [GO:0046982]; interstrand cross-link repair [GO:0036297]; kinetochore assembly [GO:0051382]; replication fork processing [GO:0031297]; resolution of meiotic recombination intermediates [G…	-	-	-	promoter-TSS (XM_008013309.2)	-	-1.33891	-	-	0.000406498	-	-	-	-1.88044	-	-	0.00895012	-	DMR	DEG
CEP170B	A0A0D9RBF0	Centrosomal protein 170B	0	-	-	-	exon (XM_007988004.2, exon 9 of 19)	-1.11136	-	-	0.0158612	-	-	-	-	-	-	-	-	DMR	-	-
CEP192	A0A0D9RY34	Centrosomal protein 192	centriole [GO:0005814]; pericentriolar material [GO:0000242]; procentriole [GO:0120098]; procentriole replication complex [GO:0120099]; phosphatase binding [GO:0019902]; protein kinase binding [GO:0019901]; centrosome duplication [GO:0051298]; centrosome-templated microtubule nucleation [GO:0090222]; mitotic spindle assembly [GO:0090307]; protein localization to centrosome [GO:0071539]; response …	-	-	-	exon (XM_037982520.1, exon 30 of 45)	1.01538	-	-	0.00675309	-	-	-	-	-	-	-	-	DMR	-	-
CEP20	A0A0D9R6P4	Centrosomal protein 20	centriolar satellite [GO:0034451]; centriole [GO:0005814]; ciliary basal body [GO:0036064]; motile cilium [GO:0031514]; nucleoplasm [GO:0005654]; identical protein binding [GO:0042802]; cilium assembly [GO:0060271]; microtubule anchoring [GO:0034453]	-	-	-	exon (XM_007986537.2, exon 2 of 5)	1.15866	-	-	2.48459e-08	-	-	-	-	-	-	-	-	DMR	-	-
CEP295	A0A0D9S177	Centrosomal protein 295	centriole [GO:0005814]; centrosome [GO:0005813]; cytosol [GO:0005829]; mitotic spindle microtubule [GO:1990498]; plasma membrane [GO:0005886]; microtubule binding [GO:0008017]; centriole replication [GO:0007099]; positive regulation of centriole elongation [GO:1903724]; positive regulation of centrosome duplication [GO:0010825]; positive regulation of establishment of protein localization [GO:190…	-	-	-	exon (XM_008020534.2, exon 4 of 27)	1.25962	-	-	0.000230651	-	-	-	-	-	-	-	-	DMR	-	-
CEP295NL	A0A0D9SCG8	CEP295 N-terminal like	centriole [GO:0005814]; centrosome [GO:0005813]; cytosol [GO:0005829]; regulation of centriole replication [GO:0046599]	-	-	-	-	-	-	-	-	-	-	-	-	1.48163	-	-	0.00875137	-	-	DEG
CEP55	A0A0D9R1U4	Centrosomal protein 55	centrosome [GO:0005813]; cytoplasm [GO:0005737]; Flemming body [GO:0090543]; intercellular bridge [GO:0045171]; identical protein binding [GO:0042802]; cranial skeletal system development [GO:1904888]; establishment of protein localization [GO:0045184]; midbody abscission [GO:0061952]; regulation of phosphatidylinositol 3-kinase/protein kinase B signal transduction [GO:0051896]	-	-	-	exon (XM_038009269.1, exon 6 of 9)	1.10474	-	-	2.02112e-10	-	-	-	-	-	-	-	-	DMR	-	-
CEP72	A0A0D9RXW9	Centrosomal protein 72	centriolar satellite [GO:0034451]; cytosol [GO:0005829]; identical protein binding [GO:0042802]; centriole replication [GO:0007099]; gamma-tubulin complex localization [GO:0033566]; regulation of protein localization to centrosome [GO:1904779]; spindle organization [GO:0007051]	-	-	-	-	-	-	-	-	-	-	-	-	1.56265	-	-	0.00190963	-	-	DEG
CEP83	A0A0D9QUJ5	Centrosomal protein 83	centriole [GO:0005814]; centrosome [GO:0005813]; ciliary transition fiber [GO:0097539]; Golgi apparatus [GO:0005794]; cilium assembly [GO:0060271]; establishment of centrosome localization [GO:0051660]; protein localization to centrosome [GO:0071539]; vesicle docking [GO:0048278]	-	-	-	exon (XM_008004257.2, exon 14 of 18)	-	1.65654	-	-	0.00762683	-	-	-	-	-	-	-	-	DMR	-
CEP89	A0A0D9QXK9	Centrosomal protein 89	centriole [GO:0005814]; centrosome [GO:0005813]; ciliary transition fiber [GO:0097539]; cytosol [GO:0005829]; mitochondrial intermembrane space [GO:0005758]; motile cilium [GO:0031514]; non-motile cilium [GO:0097730]; spindle pole [GO:0000922]; synapse [GO:0045202]; chemical synaptic transmission [GO:0007268]; mitochondrion organization [GO:0007005]; non-motile cilium assembly [GO:1905515]	-	-	-	exon (XM_007996217.2, exon 18 of 19)	-	-1.36195	-	-	0.00083446	-	-	-	-	-	-	-	-	DMR	-
CERS2	A0A0D9RZK9	Ceramide synthase 2	endoplasmic reticulum membrane [GO:0005789]; nucleus [GO:0005634]; DNA binding [GO:0003677]; sphingosine N-acyltransferase activity [GO:0050291]; ceramide biosynthetic process [GO:0046513]; regulation of lipid metabolic process [GO:0019216]	-	-	-	-	-	-	-	-	-	-	-	-	-1.47566	-	-	0.00138224	-	-	DEG
CERS6	A0A0D9RS37	Ceramide synthase 6	endoplasmic reticulum membrane [GO:0005789]; nucleus [GO:0005634]; DNA binding [GO:0003677]; sphingosine N-acyltransferase activity [GO:0050291]; ceramide biosynthetic process [GO:0046513]	-	-	-	exon (XM_007965259.2, exon 11 of 11)	-	1.7727	-	-	0.0026574	-	-	-	-	-	-	-	-	DMR	-
CETN2	A0A0D9R3S7	Centrin 2	9+2 motile cilium [GO:0097729]; apical part of cell [GO:0045177]; centriole [GO:0005814]; centrosome [GO:0005813]; ciliary basal body [GO:0036064]; myosin II complex [GO:0016460]; nuclear pore nuclear basket [GO:0044615]; photoreceptor connecting cilium [GO:0032391]; transcription export complex 2 [GO:0070390]; XPC complex [GO:0071942]; calcium ion binding [GO:0005509]; G-protein beta/gamma-subun…	-	-	-	-	-	-	-	-	-	-	-	-	-3.43524	-	-	2.26315e-09	-	-	DEG
CFAP36	A0A0D9RNX1	Cilia- and flagella-associated protein 36 (Coiled-coil domain-containing protein 104)	axoneme [GO:0005930]; ciliary base [GO:0097546]; ciliary transition zone [GO:0035869]	-	-	-	-	-	-	-	-	-	-	-	-	-1.41736	-	-	5.36326e-06	-	-	DEG
CFAP410	A0A0D9R628	Cilia and flagella associated protein 410	ciliary basal body [GO:0036064]; cytosol [GO:0005829]; mitochondrion [GO:0005739]; photoreceptor connecting cilium [GO:0032391]; photoreceptor outer segment [GO:0001750]; plasma membrane [GO:0005886]; cilium assembly [GO:0060271]; cytoskeleton organization [GO:0007010]; regulation of cell shape [GO:0008360]; smoothened signaling pathway [GO:0007224]	-	-	-	-	-	-	-	-	-	-	-	-	-2.04663	-	-	0.0403831	-	-	DEG
CFAP43	A0A0D9QYX9	Cilia- and flagella-associated protein 43	9+2 motile cilium [GO:0097729]; axoneme [GO:0005930]; extracellular region [GO:0005576]; brain development [GO:0007420]; cell morphogenesis [GO:0000902]; cerebrospinal fluid circulation [GO:0090660]; establishment of localization in cell [GO:0051649]; mucociliary clearance [GO:0120197]; nucleus organization [GO:0006997]; regulation of cilium beat frequency [GO:0003356]; sperm axoneme assembly [GO…	-	-	-	exon (XM_007964038.2, exon 33 of 38)	-	1.40671	-	-	0.0019469	-	-	-	-	-	-	-	-	DMR	-
CFAP43	A0A0D9QYX9	Cilia- and flagella-associated protein 43	9+2 motile cilium [GO:0097729]; axoneme [GO:0005930]; extracellular region [GO:0005576]; brain development [GO:0007420]; cell morphogenesis [GO:0000902]; cerebrospinal fluid circulation [GO:0090660]; establishment of localization in cell [GO:0051649]; mucociliary clearance [GO:0120197]; nucleus organization [GO:0006997]; regulation of cilium beat frequency [GO:0003356]; sperm axoneme assembly [GO…	-	-	-	exon (XM_007964038.2, exon 34 of 38)	-	2.60934	-	-	1.99837e-05	-	-	-	-	-	-	-	-	DMR	-
CFAP53	-	-	-	-	-	-	-	-	-	-	-	-	-	-	-	2.47518	-	-	0.000611957	-	-	DEG
CFAP57	A0A0D9S7J7	Cilia and flagella associated protein 57	sperm flagellum [GO:0036126]; axonemal dynein complex assembly [GO:0070286]; single fertilization [GO:0007338]; sperm flagellum assembly [GO:0120316]	-	-	-	promoter-TSS (XM_007979113.2)	1.17214	-	-	4.73365e-08	-	-	-	-	-	-	-	-	DMR	-	-
CFAP69	A0A0D9RJ78	Cilia and flagella associated protein 69	cytoplasm [GO:0005737]; non-motile cilium [GO:0097730]; sperm midpiece [GO:0097225]; olfactory behavior [GO:0042048]; positive regulation of fertilization [GO:1905516]; positive regulation of flagellated sperm motility [GO:1902093]; response to odorant [GO:1990834]; sperm axoneme assembly [GO:0007288]	-	-	-	-	-	-	-	-	-	-	-	-	1.96508	-	-	0.0165066	-	-	DEG
CFB	-	-	-	-	-	-	-	-	-	-	-	-	-	-	-	-3.03841	-	-	9.56727e-07	-	-	DEG
CFH	A0A0D9RM75	Complement factor H	extracellular region [GO:0005576]; serine-type endopeptidase complex [GO:1905370]; symbiont cell surface [GO:0106139]; heparan sulfate proteoglycan binding [GO:0043395]; heparin binding [GO:0008201]; identical protein binding [GO:0042802]; complement activation [GO:0006956]; proteolysis [GO:0006508]; regulation of complement activation, alternative pathway [GO:0030451]; regulation of complement-d…	-	-	-	exon (XM_007989082.2, exon 5 of 22)	2.47468	-	-	1.91299e-09	-	-	-	-	-	-	-	-	DMR	-	-
CFL1	-	-	-	-	-	-	-	-	-	-	-	-	-	-	-	-2.9693	-	-	2.65799e-10	-	-	DEG
CFL2	-	-	-	-	-	-	promoter-TSS (XM_037983881.1)	1.45438	-	-	2.52996e-16	-	-	-	-	-	-	-	-	DMR	-	-
CGN	-	-	-	-	-	-	exon (XM_007977193.2, exon 2 of 21)	-	1.3854	-	-	0.00838808	-	-	-	-	-	-	-	-	DMR	-
CGNL1	A0A0D9RHM1	Cingulin like 1	bicellular tight junction [GO:0005923]; myosin complex [GO:0016459]; actin filament organization [GO:0007015]; negative regulation of small GTPase mediated signal transduction [GO:0051058]; negative regulation of stress fiber assembly [GO:0051497]; protein localization to cell-cell junction [GO:0150105]	-	-	-	-	-	-	-	-	-	-	-	-	-2.53882	-	-	0.00251811	-	-	DEG
CHAC1	A0A0D9R5J7	Gamma-glutamylcyclotransferase (EC 4.3.2.7)	cytosol [GO:0005829]; trans-Golgi network [GO:0005802]; gamma-glutamylcyclotransferase activity [GO:0003839]; glutathione specific gamma-glutamylcyclotransferase activity [GO:0061928]; Notch binding [GO:0005112]; glutathione catabolic process [GO:0006751]; intrinsic apoptotic signaling pathway in response to endoplasmic reticulum stress [GO:0070059]; negative regulation of Notch signaling pathway…	Catalyzes the cleavage of glutathione into 5-oxo-L-proline and a Cys-Gly dipeptide. Acts specifically on glutathione, but not on other gamma-glutamyl peptides. {ECO:0000256|RuleBase:RU363081}.	-	-	-	-	-	-	-	-	-	-	-	3.90944	-	-	1.85443e-05	-	-	DEG
CHADL	A0A0D9R0J9	Chondroadherin like	collagen-containing extracellular matrix [GO:0062023]; plasma membrane [GO:0005886]; collagen binding [GO:0005518]; collagen fibril binding [GO:0098633]; negative regulation of chondrocyte differentiation [GO:0032331]; negative regulation of collagen fibril organization [GO:1904027]	-	-	-	-	-	-	-	-	-	-	-	-	4.83587	-	-	9.76861e-07	-	-	DEG
CHCHD2	-	-	-	-	-	-	-	-	-	-	-	-	-	-	-	-2.15412	-	-	2.42045e-07	-	-	DEG
CHCHD5	A0A0D9RW42	Coiled-coil-helix-coiled-coil-helix domain containing 5	mitochondrial intermembrane space [GO:0005758]; cellular respiration [GO:0045333]	-	-	-	-	-	-	-	-	-	-	-	-	-2.23112	-	-	0.00218751	-	-	DEG
CHD2	A0A0D9RWR2	DNA helicase (EC 3.6.4.12)	chromatin [GO:0000785]; nucleus [GO:0005634]; ATP binding [GO:0005524]; ATP hydrolysis activity [GO:0016887]; ATP-dependent chromatin remodeler activity [GO:0140658]; chromatin binding [GO:0003682]; double-stranded DNA helicase activity [GO:0036121]; forked DNA-dependent helicase activity [GO:0061749]; four-way junction helicase activity [GO:0009378]; histone binding [GO:0042393]; RNA polymerase …	-	-	GO:0002520~immune system development;GO:0002376~immune system process;GO:0002376~immune system process	promoter-TSS (XM_037987650.1)	-1.31513	-1.17197	-	8.68443e-05	0.000659099	-	-	-	1.56618	-	-	1.12209e-05	DMR	DMR	DEG
CHD4	A0A0D9RDH2	DNA helicase (EC 3.6.4.12)	centrosome [GO:0005813]; chromosome, telomeric region [GO:0000781]; cytoplasm [GO:0005737]; NuRD complex [GO:0016581]; RNA polymerase II transcription regulator complex [GO:0090575]; site of DNA damage [GO:0090734]; ATP binding [GO:0005524]; ATP hydrolysis activity [GO:0016887]; ATP-dependent chromatin remodeler activity [GO:0140658]; chromatin binding [GO:0003682]; DNA binding [GO:0003677]; doub…	-	-	-	-	-	-	-	-	-	-	-	-	-1.93382	-	-	2.46129e-08	-	-	DEG
CHD5	A0A0D9S8T5	DNA helicase (EC 3.6.4.12)	cytosol [GO:0005829]; nuclear speck [GO:0016607]; NuRD complex [GO:0016581]; ATP binding [GO:0005524]; ATP hydrolysis activity [GO:0016887]; ATP-dependent chromatin remodeler activity [GO:0140658]; chromatin binding [GO:0003682]; DNA binding [GO:0003677]; double-stranded DNA helicase activity [GO:0036121]; forked DNA-dependent helicase activity [GO:0061749]; four-way junction helicase activity [G…	-	-	-	-	-	-	-	-	-	-	-	-	2.92653	-	-	7.70961e-07	-	-	DEG
CHD8	A0A0D9RVB3	Chromodomain-helicase-DNA-binding protein 8 (CHD-8) (EC 3.6.4.12) (ATP-dependent helicase CHD8)	MLL1 complex [GO:0071339]; ATP binding [GO:0005524]; ATP hydrolysis activity [GO:0016887]; ATP-dependent H2AZ histone chaperone activity [GO:0140849]; ATP-dependent H3-H4 histone complex chaperone activity [GO:0140665]; beta-catenin binding [GO:0008013]; chromatin binding [GO:0003682]; chromatin extrusion motor activity [GO:0140584]; cohesin loader activity [GO:0061775]; DNA binding [GO:0003677];…	DNA helicase that acts as a chromatin remodeling factor and regulates transcription. Acts as a transcription repressor by remodeling chromatin structure and recruiting histone H1 to target genes. Suppresses p53/TP53-mediated apoptosis by recruiting histone H1 and preventing p53/TP53 transactivation activity. Acts as a negative regulator of Wnt signaling pathway by regulating beta-catenin (CTNNB1)…	-	-	promoter-TSS (XM_007990747.2)	-1.05345	-	-	3.60021e-06	-	-	-	-	-	-	-	-	DMR	-	-
CHD9	A0A0D9QZ34	DNA helicase (EC 3.6.4.12)	cytosol [GO:0005829]; nucleoplasm [GO:0005654]; ATP binding [GO:0005524]; double-stranded DNA helicase activity [GO:0036121]; forked DNA-dependent helicase activity [GO:0061749]; four-way junction helicase activity [GO:0009378]; hydrolase activity [GO:0016787]; single-stranded 3'-5' DNA helicase activity [GO:1990518]; chromatin organization [GO:0006325]	-	-	-	exon (XM_007993228.2, exon 31 of 39)	-	-1.05259	-	-	0.0184759	-	-	-	-	-	-	-	-	DMR	-
CHD9	A0A0D9QZ34	DNA helicase (EC 3.6.4.12)	cytosol [GO:0005829]; nucleoplasm [GO:0005654]; ATP binding [GO:0005524]; double-stranded DNA helicase activity [GO:0036121]; forked DNA-dependent helicase activity [GO:0061749]; four-way junction helicase activity [GO:0009378]; hydrolase activity [GO:0016787]; single-stranded 3'-5' DNA helicase activity [GO:1990518]; chromatin organization [GO:0006325]	-	-	-	intron (XM_038008486.1, intron 1 of 38)	1.06093	-	-	0.00766675	-	-	-	-	-	-	-	-	DMR	-	-
CHIC2	-	-	-	-	-	-	-	-	-	-	-	-	-	-	-	1.30609	-	-	0.0140339	-	-	DEG
CHKB	A0A0D9QXM7	ethanolamine kinase (EC 2.7.1.82)	cytoplasm [GO:0005737]; choline kinase activity [GO:0004103]; ethanolamine kinase activity [GO:0004305]; muscle organ development [GO:0007517]; phosphatidylethanolamine biosynthetic process [GO:0006646]	-	-	-	-	-	-	-	-	-	-	-	-	1.20683	-	-	0.0220726	-	-	DEG
CHMP1A	A0A0D9S303	Charged multivesicular body protein 1A	amphisome membrane [GO:1904930]; condensed nuclear chromosome [GO:0000794]; early endosome [GO:0005769]; kinetochore [GO:0000776]; kinetochore microtubule [GO:0005828]; lysosomal membrane [GO:0005765]; microtubule organizing center [GO:0005815]; midbody [GO:0030496]; multivesicular body membrane [GO:0032585]; nuclear matrix [GO:0016363]; nuclear pore [GO:0005643]; plasma membrane [GO:0005886]; pr…	-	-	GO:0051701~biological process involved in interaction with host;GO:0044000~movement in host;GO:0019058~viral life cycle;GO:0016032~viral process	exon (XM_007994408.2, exon 7 of 7)	-	-1.38882	-	-	0.00547362	-	-	-	-	-	-	-	-	DMR	-
CHMP2A	A0A0D9S6F1	Charged multivesicular body protein 2A	amphisome membrane [GO:1904930]; chromatin [GO:0000785]; cytosol [GO:0005829]; ESCRT III complex [GO:0000815]; kinetochore [GO:0000776]; kinetochore microtubule [GO:0005828]; lysosomal membrane [GO:0005765]; membrane coat [GO:0030117]; midbody [GO:0030496]; multivesicular body membrane [GO:0032585]; nuclear pore [GO:0005643]; plasma membrane [GO:0005886]; phosphatidylcholine binding [GO:0031210];…	-	-	-	-	-	-	-	-	-	-	-	-	-1.48752	-	-	0.0157958	-	-	DEG
CHMP3	A0A0D9RUX3	Charged multivesicular body protein 3	amphisome membrane [GO:1904930]; ESCRT III complex [GO:0000815]; kinetochore [GO:0000776]; kinetochore microtubule [GO:0005828]; lysosomal membrane [GO:0005765]; midbody [GO:0030496]; multivesicular body membrane [GO:0032585]; nuclear pore [GO:0005643]; plasma membrane [GO:0005886]; phosphatidylcholine binding [GO:0031210]; ubiquitin-specific protease binding [GO:1990381]; autophagosome maturatio…	-	-	GO:0009615~response to virus	-	-	-	-	-	-	-	-	-	-1.57276	-	-	0.00528705	-	-	DEG
CHMP4A	A0A0D9RTW8	Charged multivesicular body protein 4A	amphisome membrane [GO:1904930]; cytoplasmic side of plasma membrane [GO:0009898]; ESCRT III complex [GO:0000815]; kinetochore [GO:0000776]; kinetochore microtubule [GO:0005828]; lysosomal membrane [GO:0005765]; membrane coat [GO:0030117]; midbody [GO:0030496]; multivesicular body membrane [GO:0032585]; nuclear pore [GO:0005643]; ATPase binding [GO:0051117]; protein homodimerization activity [GO:…	-	-	-	promoter-TSS (XM_007986303.2)	-	1.17214	-	-	6.41999e-05	-	-	-	-	-	-	-	-	DMR	-
CHMP7	A0A0D9RUP0	Charged multivesicular body protein 7 (Chromatin-modifying protein 7)	amphisome membrane [GO:1904930]; chromatin [GO:0000785]; cytoplasmic side of plasma membrane [GO:0009898]; cytosol [GO:0005829]; ESCRT III complex [GO:0000815]; kinetochore [GO:0000776]; kinetochore microtubule [GO:0005828]; lysosomal membrane [GO:0005765]; midbody [GO:0030496]; multivesicular body membrane [GO:0032585]; nuclear pore [GO:0005643]; nucleoplasm [GO:0005654]; autophagosome maturatio…	-	-	GO:0016032~viral process;GO:0019058~viral life cycle;GO:0051701~biological process involved in interaction with host;GO:0044000~movement in host;GO:0019058~viral life cycle	exon (XM_007961933.2, exon 6 of 11)	-	-1.1628	-	-	4.28965e-08	-	-	-	-	-	-	-	-	DMR	-
CHMP7	A0A0D9RUP0	Charged multivesicular body protein 7 (Chromatin-modifying protein 7)	amphisome membrane [GO:1904930]; chromatin [GO:0000785]; cytoplasmic side of plasma membrane [GO:0009898]; cytosol [GO:0005829]; ESCRT III complex [GO:0000815]; kinetochore [GO:0000776]; kinetochore microtubule [GO:0005828]; lysosomal membrane [GO:0005765]; midbody [GO:0030496]; multivesicular body membrane [GO:0032585]; nuclear pore [GO:0005643]; nucleoplasm [GO:0005654]; autophagosome maturatio…	-	-	GO:0016032~viral process;GO:0019058~viral life cycle;GO:0051701~biological process involved in interaction with host;GO:0044000~movement in host;GO:0019058~viral life cycle	exon (XM_007961933.2, exon 11 of 11)	-1.36207	-	-	0.0178118	-	-	-	-	-	-	-	-	DMR	-	-
CHMP7	A0A0D9RUP0	Charged multivesicular body protein 7 (Chromatin-modifying protein 7)	amphisome membrane [GO:1904930]; chromatin [GO:0000785]; cytoplasmic side of plasma membrane [GO:0009898]; cytosol [GO:0005829]; ESCRT III complex [GO:0000815]; kinetochore [GO:0000776]; kinetochore microtubule [GO:0005828]; lysosomal membrane [GO:0005765]; midbody [GO:0030496]; multivesicular body membrane [GO:0032585]; nuclear pore [GO:0005643]; nucleoplasm [GO:0005654]; autophagosome maturatio…	-	-	GO:0016032~viral process;GO:0019058~viral life cycle;GO:0051701~biological process involved in interaction with host;GO:0044000~movement in host;GO:0019058~viral life cycle	exon (XM_007961933.2, exon 7 of 11)	-	-1.3296	-	-	0.00201234	-	-	-	-	-	-	-	-	DMR	-
CHORDC1	A0A0D9S0Y5	Cysteine and histidine-rich domain-containing protein 1 (CHORD domain-containing protein 1)	ADP binding [GO:0043531]; ATP binding [GO:0005524]; Hsp90 protein binding [GO:0051879]; zinc ion binding [GO:0008270]; chaperone-mediated protein folding [GO:0061077]; regulation of cellular response to heat [GO:1900034]; regulation of centrosome duplication [GO:0010824]	Regulates centrosome duplication, probably by inhibiting the kinase activity of ROCK2. Proposed to act as co-chaperone for HSP90. May play a role in the regulation of NOD1 via a HSP90 chaperone complex. In vitro, has intrinsic chaperone activity. This function may be achieved by inhibiting association of ROCK2 with NPM1. Plays a role in ensuring the localization of the tyrosine kinase receptor EG…	-	-	-	-	-	-	-	-	-	-	-	3.98092	-	-	2.5876e-56	-	-	DEG
CHP1	A0A0D9R5N7	Calcineurin like EF-hand protein 1	cytoskeleton [GO:0005856]; endoplasmic reticulum [GO:0005783]; endoplasmic reticulum-Golgi intermediate compartment [GO:0005793]; membrane raft [GO:0045121]; nucleus [GO:0005634]; plasma membrane [GO:0005886]; transporter complex [GO:1990351]; calcium ion binding [GO:0005509]; calcium-dependent protein binding [GO:0048306]; protein kinase inhibitor activity [GO:0004860]; sodium:proton antiporter …	-	-	-	-	-	-	-	-	-	-	-	-	-2.09667	-	-	2.53992e-05	-	-	DEG
CHPF	A0A0D9R6I1	Hexosyltransferase (EC 2.4.1.-)	Golgi cisterna membrane [GO:0032580]; glucuronosyl-N-acetylgalactosaminyl-proteoglycan 4-beta-N-acetylgalactosaminyltransferase activity [GO:0047238]; N-acetylgalactosaminyl-proteoglycan 3-beta-glucuronosyltransferase activity [GO:0050510]; chondroitin sulfate biosynthetic process [GO:0030206]	-	-	-	exon (XM_007966414.2, exon 4 of 4)	-2.18446	-	-	4.10026e-23	-	-	-	-	-1.27432	-	-	0.0186931	DMR	-	DEG
CHPT1	A0A0D9S1G2	Cholinephosphotransferase 1 (EC 2.7.8.2) (Diacylglycerol cholinephosphotransferase 1)	endoplasmic reticulum membrane [GO:0005789]; Golgi membrane [GO:0000139]; diacylglycerol cholinephosphotransferase activity [GO:0004142]; platelet activating factor biosynthetic process [GO:0006663]	-	-	-	-	-	-	-	-	-	-	-	-	-1.3931	-	-	0.0129868	-	-	DEG
CHRAC1	A0A0D9RB44	Chromatin accessibility complex subunit 1	CHRAC [GO:0008623]; pericentric heterochromatin [GO:0005721]; protein heterodimerization activity [GO:0046982]; DNA-templated DNA replication [GO:0006261]; nucleosome assembly [GO:0006334]; regulation of DNA replication [GO:0006275]	-	-	-	-	-	-	-	-	-	-	-	-	-1.42295	-	-	0.0128509	-	-	DEG
CHRDL1	A0A0D9R8Y6	Chordin like 1	extracellular space [GO:0005615]; plasma membrane [GO:0005886]; synapse [GO:0045202]; BMP binding [GO:0036122]; transforming growth factor beta binding [GO:0050431]; AMPA glutamate receptor clustering [GO:0097113]; BMP signaling pathway [GO:0030509]; cell differentiation [GO:0030154]; embryonic axis specification [GO:0000578]; excitatory chemical synaptic transmission [GO:0098976]; eye developmen…	-	-	-	exon (XM_007992568.2, exon 13 of 13)	-1.46493	-	-	4.59862e-11	-	-	-	-	-3.54379	-	-	1.06578e-11	DMR	-	DEG
CHRNA10	A0A0D9QW40	Cholinergic receptor nicotinic alpha 10 subunit	postsynaptic membrane [GO:0045211]; acetylcholine-gated monoatomic cation-selective channel activity [GO:0022848]; transmembrane signaling receptor activity [GO:0004888]; detection of mechanical stimulus involved in sensory perception of sound [GO:0050910]; inner ear morphogenesis [GO:0042472]; membrane depolarization [GO:0051899]; positive regulation of cytosolic calcium ion concentration [GO:00…	-	-	-	-	-	-	-	-	-	-	-	-	2.93809	-	-	0.00985958	-	-	DEG
CHRNB1	A0A0D9RH30	Cholinergic receptor nicotinic beta 1 subunit	acetylcholine-gated channel complex [GO:0005892]; neuromuscular junction [GO:0031594]; postsynaptic specialization membrane [GO:0099634]; acetylcholine binding [GO:0042166]; acetylcholine receptor activity [GO:0015464]; acetylcholine-gated monoatomic cation-selective channel activity [GO:0022848]; behavioral response to nicotine [GO:0035095]; muscle cell development [GO:0055001]; muscle contracti…	-	-	-	exon (XM_008010142.2, exon 11 of 11)	-1.94057	-	-	6.6625e-07	-	-	-	-	-	-	-	-	DMR	-	-
CHRNB1	A0A0D9RH30	Cholinergic receptor nicotinic beta 1 subunit	acetylcholine-gated channel complex [GO:0005892]; neuromuscular junction [GO:0031594]; postsynaptic specialization membrane [GO:0099634]; acetylcholine binding [GO:0042166]; acetylcholine receptor activity [GO:0015464]; acetylcholine-gated monoatomic cation-selective channel activity [GO:0022848]; behavioral response to nicotine [GO:0035095]; muscle cell development [GO:0055001]; muscle contracti…	-	-	-	TTS (XM_008010143.2)	-1.48635	-	-	2.70906e-06	-	-	-	-	-	-	-	-	DMR	-	-
CHST10	A0A0D9RX85	Carbohydrate sulfotransferase (EC 2.8.2.-)	Golgi membrane [GO:0000139]; sulfotransferase activity [GO:0008146]; androgen metabolic process [GO:0008209]; carbohydrate biosynthetic process [GO:0016051]; estrogen metabolic process [GO:0008210]; learning [GO:0007612]; long-term memory [GO:0007616]; proteoglycan biosynthetic process [GO:0030166]	-	-	-	exon (XM_008008180.2, exon 7 of 7)	-1.20853	-	-	7.31863e-12	-	-	-	-	-	-	-	-	DMR	-	-
CHTF8	A0A0D9QVS4	Chromosome transmission fidelity factor 8	Ctf18 RFC-like complex [GO:0031390]; DNA binding [GO:0003677]; DNA clamp loader activity [GO:0003689]; single-stranded DNA helicase activity [GO:0017116]; DNA replication [GO:0006260]; mitotic sister chromatid cohesion [GO:0007064]	-	-	-	exon (XM_007993827.2, exon 4 of 4)	-1.28679	-	-	2.05146e-10	-	-	-	-	-	-	-	-	DMR	-	-
CHUK	A0A0D9R033	Inhibitor of nuclear factor kappa-B kinase subunit alpha (EC 2.7.11.10) (Nuclear factor NF-kappa-B inhibitor kinase alpha)	IkappaB kinase complex [GO:0008385]; nucleoplasm [GO:0005654]; ATP binding [GO:0005524]; IkappaB kinase activity [GO:0008384]; protein heterodimerization activity [GO:0046982]; protein homodimerization activity [GO:0042803]; scaffold protein binding [GO:0097110]; transferrin receptor binding [GO:1990459]; cellular response to virus [GO:0098586]; non-canonical NF-kappaB signal transduction [GO:003…	-	-	GO:0009615~response to virus	exon (XM_007963830.2, exon 3 of 21)	1.26197	-	-	0.00944404	-	-	-	-	-	-	-	-	DMR	-	-
CIAO2A	-	-	-	-	-	-	-	-	-	-	-	-	-	-	-	-1.32395	-	-	0.000495286	-	-	DEG
CIART	A0A0D9RZR7	Circadian associated repressor of transcription	nucleus [GO:0005634]; E-box binding [GO:0070888]; circadian regulation of gene expression [GO:0032922]; locomotor rhythm [GO:0045475]; negative regulation of DNA-templated transcription [GO:0045892]	-	-	-	-	-	-	-	-	-	-	-	-	1.76275	-	-	0.00257297	-	-	DEG
CIB1	A0A0D9RX03	Calcium and integrin-binding protein 1 (Calmyrin)	apical plasma membrane [GO:0016324]; centrosome [GO:0005813]; endoplasmic reticulum [GO:0005783]; filopodium tip [GO:0032433]; growth cone [GO:0030426]; lamellipodium [GO:0030027]; nucleoplasm [GO:0005654]; perikaryon [GO:0043204]; perinuclear region of cytoplasm [GO:0048471]; ruffle membrane [GO:0032587]; sarcolemma [GO:0042383]; calcium ion binding [GO:0005509]; calcium-dependent protein kinase…	-	-	GO:0002682~regulation of immune system process;GO:0002376~immune system process;GO:0002520~immune system development	-	-	-	-	-	-	-	-	-	-2.0786	-	-	0.000585322	-	-	DEG
CIC	-	-	-	-	-	-	exon (XM_007996977.2, exon 2 of 21)	1.22979	-	-	0.000610658	-	-	-	-	-	-	-	-	DMR	-	-
CILK1	A0A0D9RL19	Ciliogenesis associated kinase 1	ciliary basal body [GO:0036064]; ciliary base [GO:0097546]; ciliary tip [GO:0097542]; fibrillar center [GO:0001650]; ATP binding [GO:0005524]; magnesium ion binding [GO:0000287]; protein serine/threonine kinase activity [GO:0004674]; cilium assembly [GO:0060271]; intracellular signal transduction [GO:0035556]; intraciliary anterograde transport [GO:0035720]; intraciliary retrograde transport [GO:…	-	-	-	-	-	-	-	-	-	-	-	-	-1.67797	-	-	0.0387424	-	-	DEG
CISD2	A0A0D9QVL4	CDGSH iron-sulfur domain-containing protein 2	endoplasmic reticulum membrane [GO:0005789]; mitochondrial outer membrane [GO:0005741]; perinuclear endoplasmic reticulum [GO:0097038]; protein-containing complex [GO:0032991]; 2 iron, 2 sulfur cluster binding [GO:0051537]; metal ion binding [GO:0046872]; protein homodimerization activity [GO:0042803]; autophagy of mitochondrion [GO:0000422]; regulation of autophagy [GO:0010506]	Regulator of autophagy that contributes to antagonize BECN1-mediated cellular autophagy at the endoplasmic reticulum. Participates in the interaction of BCL2 with BECN1 and is required for BCL2-mediated depression of endoplasmic reticulum Ca(2+) stores during autophagy. {ECO:0000256|RuleBase:RU369084}.	-	-	-	-	-	-	-	-	-	-	-	-1.41875	-	-	0.000295031	-	-	DEG
CISD3	A0A0D9S3G4	CDGSH iron sulfur domain 3	mitochondrion [GO:0005739]; 2 iron, 2 sulfur cluster binding [GO:0051537]; metal ion binding [GO:0046872]; protein maturation by [2Fe-2S] cluster transfer [GO:0106034]	-	-	-	-	-	-	-	-	-	-	-	-	-2.50402	-	-	5.17797e-05	-	-	DEG
CIT	A0A0D9S4G6	Citron Rho-interacting kinase (EC 2.7.11.1)	cytosol [GO:0005829]; 3-phosphoinositide-dependent protein kinase activity [GO:0004676]; AMP-activated protein kinase activity [GO:0004679]; ATP binding [GO:0005524]; DNA-dependent protein kinase activity [GO:0004677]; eukaryotic translation initiation factor 2alpha kinase activity [GO:0004694]; histone H2AS1 kinase activity [GO:0044024]; histone H2AS121 kinase activity [GO:0072371]; histone H2AT…	Plays a role in cytokinesis. Displays serine/threonine protein kinase activity. {ECO:0000256|PIRNR:PIRNR038145}.	-	-	-	-	-	-	-	-	-	-	-	-1.43164	-	-	0.000956952	-	-	DEG
CITED2	A0A0D9SAC0	Cbp/p300-interacting transactivator 2	chromatin [GO:0000785]; cytosol [GO:0005829]; nucleoplasm [GO:0005654]; protein-containing complex [GO:0032991]; chromatin binding [GO:0003682]; histone acetyltransferase binding [GO:0035035]; LBD domain binding [GO:0050693]; RNA polymerase II-specific DNA-binding transcription factor binding [GO:0061629]; SMAD binding [GO:0046332]; transcription coactivator activity [GO:0003713]; transcription c…	-	-	GO:0002376~immune system process;GO:0002520~immune system development	exon (XM_008006844.2, exon 2 of 2)	-1.00156	-	-	3.42326e-37	-	-	-	-	-2.36402	-	-	0.0105231	DMR	-	DEG
CITED2	A0A0D9SAC0	Cbp/p300-interacting transactivator 2	chromatin [GO:0000785]; cytosol [GO:0005829]; nucleoplasm [GO:0005654]; protein-containing complex [GO:0032991]; chromatin binding [GO:0003682]; histone acetyltransferase binding [GO:0035035]; LBD domain binding [GO:0050693]; RNA polymerase II-specific DNA-binding transcription factor binding [GO:0061629]; SMAD binding [GO:0046332]; transcription coactivator activity [GO:0003713]; transcription c…	-	-	GO:0002520~immune system development	exon (XM_008006844.2, exon 2 of 2)	-1.00156	-	-	3.42326e-37	-	-	-	-	-2.36402	-	-	0.0105231	DMR	-	DEG
CKAP2	A0A0D9RYK4	Cytoskeleton associated protein 2	centrosome [GO:0005813]; cytoplasm [GO:0005737]; mitotic spindle [GO:0072686]; mitotic cytokinesis [GO:0000281]; negative regulation of microtubule depolymerization [GO:0007026]; positive regulation of transcription by RNA polymerase II [GO:0045944]	-	-	-	exon (XM_007960477.2, exon 9 of 9)	1.20898	-	-	0.0073895	-	-	-	-	-1.71879	-	-	0.000399507	DMR	-	DEG
CKAP2L	A0A0D9RW34	Cytoskeleton associated protein 2 like	centrosome [GO:0005813]; cytosol [GO:0005829]; mitotic spindle [GO:0072686]	-	-	-	exon (XM_008008412.2, exon 9 of 9)	1.80418	-	-	0.00511687	-	-	-	-	-	-	-	-	DMR	-	-
CKAP4	A0A0D9S2I7	Cytoskeleton associated protein 4	lipid droplet [GO:0005811]; plasma membrane [GO:0005886]; rough endoplasmic reticulum [GO:0005791]	-	-	-	-	-	-	-	-	-	-	-	-	-2.44251	-	-	0.00359396	-	-	DEG
CKAP5	A0A0D9R056	Cytoskeleton associated protein 5	centrosome [GO:0005813]; cytoplasm [GO:0005737]; kinetochore [GO:0000776]; microtubule plus-end [GO:0035371]; nucleolus [GO:0005730]; plasma membrane [GO:0005886]; protein-containing complex [GO:0032991]; spindle pole [GO:0000922]; microtubule plus end polymerase [GO:0061863]; microtubule plus-end binding [GO:0051010]; ribonucleoprotein complex binding [GO:0043021]; centrosome cycle [GO:0007098];…	-	-	-	-	-	-	-	-	-	-	-	-	-1.22442	-	-	1.26301e-06	-	-	DEG
CKLF	A0A0D9QXA2	Chemokine like factor	extracellular region [GO:0005576]; membrane [GO:0016020]; chemokine activity [GO:0008009]; lymphocyte chemotaxis [GO:0048247]; macrophage chemotaxis [GO:0048246]; neutrophil chemotaxis [GO:0030593]; secretion by cell [GO:0032940]	-	-	-	-	-	-	-	-	-	-	-	-	-1.41874	-	-	0.026635	-	-	DEG
CLBA1	A0A0D9RBA1	Clathrin binding box of aftiphilin containing 1	AP-1 adaptor complex [GO:0030121]; trans-Golgi network membrane [GO:0032588]; clathrin binding [GO:0030276]; intracellular transport [GO:0046907]	-	-	-	exon (XM_007988016.2, exon 5 of 5)	-1.50464	-	-	0.00671877	-	-	-	-	-	-	-	-	DMR	-	-
CLCC1	-	-	-	-	-	-	-	-	-	-	-	-	-	-	-	-1.29081	-	-	0.00476629	-	-	DEG
CLCF1	A0A0D9R849	Cardiotrophin like cytokine factor 1	CNTFR-CLCF1 complex [GO:0097059]; CRLF-CLCF1 complex [GO:0097058]; extracellular space [GO:0005615]; ciliary neurotrophic factor receptor binding [GO:0005127]; cytokine activity [GO:0005125]; B cell differentiation [GO:0030183]; cell surface receptor signaling pathway via JAK-STAT [GO:0007259]; negative regulation of neuron apoptotic process [GO:0043524]; positive regulation of astrocyte differen…	-	-	-	exon (XM_007967590.2, exon 3 of 3)	-1.06673	-	-	1.21134e-05	-	-	-	-	-	-	-	-	DMR	-	-
CLCN6	A0A0D9S8L6	Chloride channel protein	lysosomal membrane [GO:0005765]; antiporter activity [GO:0015297]; voltage-gated chloride channel activity [GO:0005247]	-	-	-	-	-	-	-	-	-	-	-	-	1.03379	-	-	0.00275398	-	-	DEG
CLDN1	A0A0D9R9I2	Claudin	apical plasma membrane [GO:0016324]; basolateral plasma membrane [GO:0016323]; bicellular tight junction [GO:0005923]; lateral plasma membrane [GO:0016328]; protein-containing complex [GO:0032991]; identical protein binding [GO:0042802]; structural molecule activity [GO:0005198]; virus receptor activity [GO:0001618]; bicellular tight junction assembly [GO:0070830]; calcium-independent cell-cell a…	Claudins function as major constituents of the tight junction complexes that regulate the permeability of epithelia. {ECO:0000256|RuleBase:RU060637}.	-	GO:0001618~virus receptor activity	-	-	-	-	-	-	-	-	-	-2.68335	-	-	4.14671e-06	-	-	DEG
CLDN2	A0A0D9RA61	Claudin	bicellular tight junction [GO:0005923]; plasma membrane [GO:0005886]; identical protein binding [GO:0042802]; paracellular tight junction channel activity [GO:0160187]; structural molecule activity [GO:0005198]; calcium-independent cell-cell adhesion via plasma membrane cell-adhesion molecules [GO:0016338]; innate immune response in mucosa [GO:0002227]; paracellular transport [GO:0160184]; regula…	Claudins function as major constituents of the tight junction complexes that regulate the permeability of epithelia. {ECO:0000256|RuleBase:RU060637}.	-	-	exon (XM_007992474.2, exon 2 of 2)	-1.4302	-	-	2.70844e-301	-	-	-	-	-3.8779	-	-	0.00103747	DMR	-	DEG
CLDN22	A0A0D9SAK6	Claudin	bicellular tight junction [GO:0005923]; plasma membrane [GO:0005886]; structural molecule activity [GO:0005198]	Claudins function as major constituents of the tight junction complexes that regulate the permeability of epithelia. {ECO:0000256|RuleBase:RU060637}.	-	-	promoter-TSS (XM_037994019.1)	-1.20294	1.17743	-	6.98082e-06	3.85206e-05	-	-	-	-	-	-	-	DMR	DMR	-
CLDN23	A0A0D9SB18	Claudin 23	bicellular tight junction [GO:0005923]; plasma membrane [GO:0005886]; structural molecule activity [GO:0005198]	-	-	-	exon (XM_007961690.2, exon 1 of 1)	-1.20967	-	-	0.00630711	-	-	-	-	-	-	-	-	DMR	-	-
CLDN4	A0A0D9SDP6	Claudin	bicellular tight junction [GO:0005923]; chloride channel complex [GO:0034707]; plasma membrane [GO:0005886]; chloride channel activity [GO:0005254]; structural molecule activity [GO:0005198]; establishment of skin barrier [GO:0061436]; positive regulation of cell migration [GO:0030335]; positive regulation of wound healing [GO:0090303]; regulation of cell morphogenesis [GO:0022604]	Claudins function as major constituents of the tight junction complexes that regulate the permeability of epithelia. {ECO:0000256|RuleBase:RU060637}.	-	-	exon (XM_008018331.2, exon 1 of 1)	-1.12247	-	-	1.60507e-43	-	-	-	-	-	-	-	-	DMR	-	-
CLDND1	A0A0D9R118	Claudin domain containing 1	apical plasma membrane [GO:0016324]	-	-	-	intron (XM_038003217.1, intron 1 of 4)	-	1.69131	-	-	3.10634e-07	-	-	-	-	-	-	-	-	DMR	-
CLEC16A	A0A0D9R7S7	C-type lectin domain containing 16A	cytosol [GO:0005829]; Golgi apparatus [GO:0005794]; late endosome [GO:0005770]; cellular response to starvation [GO:0009267]; endosomal transport [GO:0016197]; mitophagy [GO:0000423]; negative regulation of autophagosome maturation [GO:1901097]; positive regulation of TORC1 signaling [GO:1904263]; vacuolar transport [GO:0007034]	-	-	-	exon (XM_007985727.2, exon 24 of 24)	-	1.63282	-	-	0.00569578	-	-	-	-	-	-	-	-	DMR	-
CLEC18C	-	-	-	-	-	-	-	-	-	-	-	-	-	-	-	3.04508	-	-	0.00671344	-	-	DEG
CLHC1	A0A0D9RNQ4	Clathrin heavy chain linker domain-containing protein 1	0	-	-	-	exon (XM_007970598.2, exon 5 of 12)	1.35234	-	-	0.00295254	-	-	-	-	-	-	-	-	DMR	-	-
CLIC1	A0A0D9R8K1	Chloride intracellular channel protein	chloride channel complex [GO:0034707]; endoplasmic reticulum [GO:0005783]; extracellular exosome [GO:0070062]; mitochondrion [GO:0005739]; nuclear membrane [GO:0031965]; perinuclear region of cytoplasm [GO:0048471]; plasma membrane [GO:0005886]; chloride channel activity [GO:0005254]; oxidoreductase activity [GO:0016491]; positive regulation of osteoblast differentiation [GO:0045669]; regulation …	In the soluble state, catalyzes glutaredoxin-like thiol disulfide exchange reactions with reduced glutathione as electron donor. Reduces selenite and dehydroascorbate and may act as an antioxidant during oxidative stress response. Can insert into membranes and form voltage-dependent multi-ion conductive channels. Membrane insertion seems to be redox-regulated and may occur only under oxidizing co…	-	-	-	-	-	-	-	-	-	-	-	-1.33353	-	-	0.00125104	-	-	DEG
CLK1	A0A0D9REN9	dual-specificity kinase (EC 2.7.12.1)	nucleus [GO:0005634]; ATP binding [GO:0005524]; protein serine/threonine kinase activity [GO:0004674]; protein tyrosine kinase activity [GO:0004713]; regulation of RNA splicing [GO:0043484]	-	-	-	exon (XM_007965798.2, exon 7 of 13)	1.13851	-	-	0.00656462	-	-	-	-	1.96251	-	-	8.10496e-06	DMR	-	DEG
CLK1	A0A0D9REN9	dual-specificity kinase (EC 2.7.12.1)	nucleus [GO:0005634]; ATP binding [GO:0005524]; protein serine/threonine kinase activity [GO:0004674]; protein tyrosine kinase activity [GO:0004713]; regulation of RNA splicing [GO:0043484]	-	-	-	exon (XM_007965798.2, exon 10 of 13)	1.09495	-	-	1.18885e-05	-	-	-	-	1.96251	-	-	8.10496e-06	DMR	-	DEG
CLK4	A0A0D9R8C1	dual-specificity kinase (EC 2.7.12.1)	nucleus [GO:0005634]; ATP binding [GO:0005524]; protein serine/threonine kinase activity [GO:0004674]; protein tyrosine kinase activity [GO:0004713]; regulation of RNA splicing [GO:0043484]	-	-	-	-	-	-	-	-	-	-	-	-	2.06245	-	-	0.000157507	-	-	DEG
CLMN	A0A0D9RE49	Calmin	cytoplasm [GO:0005737]; meiotic nuclear membrane microtubule tethering complex [GO:0034993]; nuclear outer membrane [GO:0005640]; actin filament binding [GO:0051015]; negative regulation of cell population proliferation [GO:0008285]; neuron projection development [GO:0031175]; nuclear migration [GO:0007097]	-	-	-	-	-	-	-	-	-	-	-	-	1.83723	-	-	0.00254757	-	-	DEG
CLN6	A0A0D9RM00	CLN6 transmembrane ER protein	early endosome [GO:0005769]; endoplasmic reticulum lumen [GO:0005788]; membrane raft [GO:0045121]; nucleolus [GO:0005730]; lysophosphatidic acid binding [GO:0035727]; protein homodimerization activity [GO:0042803]; sulfatide binding [GO:0120146]; cholesterol metabolic process [GO:0008203]; ganglioside metabolic process [GO:0001573]; glycosaminoglycan metabolic process [GO:0030203]; locomotion inv…	-	-	-	-	-	-	-	-	-	-	-	-	-1.86976	-	-	0.00194512	-	-	DEG
CLNS1A	A0A0D9QUZ6	Methylosome subunit pICln (Chloride channel, nucleotide sensitive 1A) (Chloride conductance regulatory protein ICln)	cytosol [GO:0005829]; methylosome [GO:0034709]; nucleoplasm [GO:0005654]; pICln-Sm protein complex [GO:0034715]; plasma membrane [GO:0005886]; spliceosomal complex [GO:0005681]; cell volume homeostasis [GO:0006884]; chloride transport [GO:0006821]; mRNA cis splicing, via spliceosome [GO:0045292]; spliceosomal snRNP assembly [GO:0000387]	Involved in both the assembly of spliceosomal snRNPs and the methylation of Sm proteins. Chaperone that regulates the assembly of spliceosomal U1, U2, U4 and U5 small nuclear ribonucleoproteins (snRNPs), the building blocks of the spliceosome, and thereby plays an important role in the splicing of cellular pre-mRNAs. Most spliceosomal snRNPs contain a common set of Sm proteins SNRPB, SNRPD1, SNRP…	-	-	-	-	-	-	-	-	-	-	-	-1.37738	-	-	0.0013699	-	-	DEG
CLOCK	A0A0D9QYA2	Circadian locomoter output cycles protein kaput (EC 2.3.1.48)	chromatoid body [GO:0033391]; chromosome [GO:0005694]; CLOCK-BMAL transcription complex [GO:1990513]; cytosol [GO:0005829]; nucleoplasm [GO:0005654]; chromatin DNA binding [GO:0031490]; DNA-binding transcription activator activity, RNA polymerase II-specific [GO:0001228]; E-box binding [GO:0070888]; histone acetyltransferase activity [GO:0004402]; protein dimerization activity [GO:0046983]; cellu…	-	-	-	exon (XM_007998672.2, exon 13 of 23)	1.48461	-	-	0.000111562	-	-	-	-	-	-	-	-	DMR	-	-
CLPTM1L	A0A0D9RXR3	Lipid scramblase CLPTM1L (Cisplatin resistance-related protein 9) (Cleft lip and palate transmembrane protein 1-like protein)	endoplasmic reticulum membrane [GO:0005789]; phospholipid scramblase activity [GO:0017128]	Scramblase that mediates the translocation of glucosaminylphosphatidylinositol (alpha-D-GlcN-(1-6)-(1,2-diacyl-sn-glycero-3-phospho)-1D-myo-inositol, GlcN-PI) across the endoplasmic reticulum (ER) membrane, from the cytosolic leaflet to the luminal leaflet of the ER membrane, where it participates in the biosynthesis of glycosylphosphatidylinositol (GPI). GPI is a lipid glycoconjugate involved in…	-	-	exon (XM_007961141.2, exon 17 of 17)	-1.49665	-	-	0.00366416	-	-	-	-	-	-	-	-	DMR	-	-
CLSPN	-	-	-	-	-	-	exon (XM_007979433.2, exon 8 of 25)	1.10196	-	-	7.09252e-05	-	-	-	-	-	-	-	-	DMR	-	-
CLSTN1	A0A0D9S8P6	Calsyntenin 1	cell surface [GO:0009986]; endoplasmic reticulum membrane [GO:0005789]; extracellular region [GO:0005576]; glutamatergic synapse [GO:0098978]; Golgi membrane [GO:0000139]; neuron projection [GO:0043005]; postsynaptic density [GO:0014069]; postsynaptic endosome [GO:0098845]; postsynaptic membrane [GO:0045211]; amyloid-beta binding [GO:0001540]; calcium ion binding [GO:0005509]; kinesin binding [GO…	-	-	-	-	-	-	-	-	-	-	-	-	-2.08379	-	-	2.09844e-10	-	-	DEG
CLTA	A0A0D9RE73	Clathrin light chain	clathrin coat of coated pit [GO:0030132]; clathrin coat of trans-Golgi network vesicle [GO:0030130]; clathrin complex [GO:0071439]; postsynaptic endocytic zone cytoplasmic component [GO:0099631]; synaptic vesicle membrane [GO:0030672]; clathrin heavy chain binding [GO:0032050]; structural molecule activity [GO:0005198]; clathrin coat assembly [GO:0048268]; clathrin-dependent endocytosis [GO:00725…	Clathrin is the major protein of the polyhedral coat of coated pits and vesicles. {ECO:0000256|RuleBase:RU363137}.	-	-	-	-	-	-	-	-	-	-	-	-1.82933	-	-	0.00155717	-	-	DEG
CLTB	A0A0D9RAG9	Clathrin light chain	ciliary membrane [GO:0060170]; clathrin coat of coated pit [GO:0030132]; clathrin coat of trans-Golgi network vesicle [GO:0030130]; cytosol [GO:0005829]; postsynaptic endocytic zone cytoplasmic component [GO:0099631]; synaptic vesicle membrane [GO:0030672]; trans-Golgi network [GO:0005802]; clathrin heavy chain binding [GO:0032050]; structural molecule activity [GO:0005198]; clathrin-dependent en…	Clathrin is the major protein of the polyhedral coat of coated pits and vesicles. {ECO:0000256|RuleBase:RU363137}.	-	-	exon (XM_008015371.2, exon 5 of 5)	-1.19158	-	-	1.05906e-18	-	-	-	-	-	-	-	-	DMR	-	-
CLTC	A0A0D9R0N5	Clathrin heavy chain	clathrin coat of coated pit [GO:0030132]; clathrin coat of trans-Golgi network vesicle [GO:0030130]; clathrin complex [GO:0071439]; clathrin-coated endocytic vesicle [GO:0045334]; cytosol [GO:0005829]; endosome [GO:0005768]; extracellular exosome [GO:0070062]; lysosome [GO:0005764]; mitotic spindle microtubule [GO:1990498]; clathrin light chain binding [GO:0032051]; disordered domain specific bin…	Clathrin is the major protein of the polyhedral coat of coated pits and vesicles. {ECO:0000256|PIRNR:PIRNR002290}.	-	-	-	-	-	-	-	-	-	-	-	-1.04515	-	-	0.000551159	-	-	DEG
CLU	A0A0D9RTW6	Clusterin	apical dendrite [GO:0097440]; cell periphery [GO:0071944]; cell surface [GO:0009986]; chromaffin granule [GO:0042583]; cytoskeleton [GO:0005856]; cytosol [GO:0005829]; mitochondrial inner membrane [GO:0005743]; neurofibrillary tangle [GO:0097418]; nucleus [GO:0005634]; perinuclear endoplasmic reticulum lumen [GO:0099020]; spherical high-density lipoprotein particle [GO:0034366]; synapse [GO:00452…	-	-	-	exon (XM_007961997.2, exon 3 of 9)	-	-1.08225	-	-	9.80305e-85	-	-	-	-1.84024	-	-	0.00945192	-	DMR	DEG
CMPK1	-	-	-	-	-	-	-	-	-	-	-	-	-	-	-	-1.77808	-	-	9.52017e-05	-	-	DEG
CMTM3	A0A0D9QX82	CKLF like MARVEL transmembrane domain containing 3	cytoplasmic vesicle [GO:0031410]; cytosol [GO:0005829]; membrane [GO:0016020]	-	-	-	-	-	-	-	-	-	-	-	-	-2.11865	-	-	2.76518e-06	-	-	DEG
CMTM4	A0A0D9QX78	CKLF like MARVEL transmembrane domain containing 4	membrane [GO:0016020]	-	-	-	-	-	-	-	-	-	-	-	-	-1.0702	-	-	0.000469716	-	-	DEG
CMTM6	A0A0D9RB56	CKLF like MARVEL transmembrane domain containing 6	early endosome membrane [GO:0031901]; plasma membrane [GO:0005886]; recycling endosome membrane [GO:0055038]; endocytic recycling [GO:0032456]; protein transport [GO:0015031]; regulation of protein stability [GO:0031647]	-	-	-	-	-	-	-	-	-	-	-	-	-1.558	-	-	1.54196e-07	-	-	DEG
CMYA5	A0A0D9RRR1	Cardiomyopathy associated 5	cytosol [GO:0005829]; nuclear speck [GO:0016607]; plasma membrane [GO:0005886]	-	-	-	-	-	-	-	-	-	-	-	-	2.36977	-	-	0.0351804	-	-	DEG
CNDP2	A0A0D9S055	Cytosolic non-specific dipeptidase (EC 3.4.13.18) (CNDP dipeptidase 2) (Threonyl dipeptidase)	cytosol [GO:0005829]; nucleoplasm [GO:0005654]; carboxypeptidase activity [GO:0004180]; metal ion binding [GO:0046872]; metallodipeptidase activity [GO:0070573]; proteolysis [GO:0006508]	Catalyzes the peptide bond hydrolysis in dipeptides, displaying a non-redundant activity toward threonyl dipeptides. Mediates threonyl dipeptide catabolism in a tissue-specific way. Has high dipeptidase activity toward cysteinylglycine, an intermediate metabolite in glutathione metabolism. Metabolizes N-lactoyl-amino acids, both through hydrolysis to form lactic acid and amino acids, as well as t…	-	-	-	-	-	-	-	-	-	-	-	-1.21528	-	-	0.0104125	-	-	DEG
CNGA3	A0A0D9RXE1	Cyclic nucleotide gated channel subunit alpha 3	intracellular cyclic nucleotide activated cation channel complex [GO:0017071]; plasma membrane [GO:0005886]; cGMP binding [GO:0030553]; intracellularly cAMP-activated cation channel activity [GO:0005222]; intracellularly cGMP-activated cation channel activity [GO:0005223]; protein-containing complex binding [GO:0044877]	-	-	-	exon (XM_008008086.2, exon 7 of 7)	-1.54081	-	-	8.87697e-05	-	-	-	-	-	-	-	-	DMR	-	-
CNIH1	A0A0D9RQQ0	Cornichon family AMPA receptor auxiliary protein 1	membrane [GO:0016020]; vesicle-mediated transport [GO:0016192]	-	-	-	-	-	-	-	-	-	-	-	-	-1.81704	-	-	4.23607e-05	-	-	DEG
CNN2	-	-	-	-	-	-	-	-	-	-	-	-	-	-	-	-2.51392	-	-	0.00102997	-	-	DEG
CNN3	A0A0D9S6P9	Calponin	actin cytoskeleton [GO:0015629]; cytosol [GO:0005829]; actin filament binding [GO:0051015]; calmodulin binding [GO:0005516]; actin filament organization [GO:0007015]; actomyosin structure organization [GO:0031032]; epithelial cell differentiation [GO:0030855]	Thin filament-associated protein that is implicated in the regulation and modulation of smooth muscle contraction. It is capable of binding to actin, calmodulin and tropomyosin. The interaction of calponin with actin inhibits the actomyosin Mg-ATPase activity. {ECO:0000256|ARBA:ARBA00025109, ECO:0000256|RuleBase:RU361224}.	-	-	TTS (XM_007977894.2)	1.09731	1.13618	-	1.72739e-20	5.0211e-25	-	-	-	-2.79255	-	-	5.91171e-05	DMR	DMR	DEG
CNNM3	A0A0D9RXK6	Metal transporter	plasma membrane [GO:0005886]; transmembrane transporter activity [GO:0022857]; magnesium ion homeostasis [GO:0010960]	Metal transporter. {ECO:0000256|RuleBase:RU369091}.	-	-	exon (XM_008008035.2, exon 1 of 8)	-1.48269	-	-	1.3002e-09	-	-	-	-	-	-	-	-	DMR	-	-
CNNM4	A0A0D9RXL3	Metal transporter	basolateral plasma membrane [GO:0016323]; protein-containing complex [GO:0032991]; magnesium ion transmembrane transporter activity [GO:0015095]; sodium ion transmembrane transporter activity [GO:0015081]; enamel mineralization [GO:0070166]; intracellular monoatomic cation homeostasis [GO:0030003]; magnesium ion homeostasis [GO:0010960]	Metal transporter. {ECO:0000256|RuleBase:RU369091}.	-	-	exon (XM_008008033.2, exon 1 of 7)	-1.01789	-	-	0.00127488	-	-	-	-	-	-	-	-	DMR	-	-
CNOT2	A0A0D9QVZ5	CCR4-NOT transcription complex subunit 2	CCR4-NOT core complex [GO:0030015]; cytosol [GO:0005829]; nucleoplasm [GO:0005654]; plasma membrane [GO:0005886]; poly(A)-specific ribonuclease activity [GO:0004535]; transcription corepressor binding [GO:0001222]; negative regulation of intracellular estrogen receptor signaling pathway [GO:0033147]; negative regulation of transcription by RNA polymerase II [GO:0000122]; positive regulation of cy…	-	-	-	promoter-TSS (XM_008004004.2)	1.13256	-	-	3.12269e-07	-	-	-	-	-	-	-	-	DMR	-	-
CNOT4	A0A0D9R9Q8	CCR4-NOT transcription complex subunit 4	CCR4-NOT complex [GO:0030014]; metal ion binding [GO:0046872]; RNA binding [GO:0003723]; ubiquitin-protein transferase activity [GO:0004842]; protein autoubiquitination [GO:0051865]; regulation of megakaryocyte differentiation [GO:0045652]; ubiquitin-dependent protein catabolic process [GO:0006511]	-	-	-	-	-	-	-	-	-	-	-	-	1.05274	-	-	0.0192814	-	-	DEG
CNOT6L	A0A0D9QX23	poly(A)-specific ribonuclease (EC 3.1.13.4)	CCR4-NOT complex [GO:0030014]; cytosol [GO:0005829]; nucleus [GO:0005634]; metal ion binding [GO:0046872]; poly(A)-specific ribonuclease activity [GO:0004535]; mRNA processing [GO:0006397]; nuclear-transcribed mRNA catabolic process, deadenylation-dependent decay [GO:0000288]; positive regulation of cell population proliferation [GO:0008284]; positive regulation of cytoplasmic mRNA processing bod…	-	-	-	exon (XM_007998981.2, exon 12 of 12)	1.10504	-	-	0.00620366	-	-	-	-	-	-	-	-	DMR	-	-
CNOT7	A0A0D9RW45	poly(A)-specific ribonuclease (EC 3.1.13.4)	CCR4-NOT complex [GO:0030014]; nuclear speck [GO:0016607]; P-body [GO:0000932]; DNA-binding transcription factor binding [GO:0140297]; piRNA binding [GO:0034584]; poly(A)-specific ribonuclease activity [GO:0004535]; transcription corepressor activity [GO:0003714]; deadenylation-dependent decapping of nuclear-transcribed mRNA [GO:0000290]; defense response to virus [GO:0051607]; miRNA-mediated gen…	-	-	GO:0045070~positive regulation of viral genome replication;GO:0045069~regulation of viral genome replication;GO:0019079~viral genome replication;GO:0045824~negative regulation of innate immune response;GO:0050777~negative regulation of immune response	-	-	-	-	-	-	-	-	-	-1.30489	-	-	0.00539265	-	-	DEG
CNOT9	A0A0D9R8X3	CCR4-NOT transcription complex subunit 9 (Cell differentiation protein RQCD1 homolog)	CCR4-NOT complex [GO:0030014]; P-body [GO:0000932]; epidermal growth factor receptor binding [GO:0005154]; kinase binding [GO:0019900]; nuclear receptor coactivator activity [GO:0030374]; protein domain specific binding [GO:0019904]; protein homodimerization activity [GO:0042803]; cytokine-mediated signaling pathway [GO:0019221]; mRNA catabolic process [GO:0006402]; negative regulation of intrace…	-	-	-	exon (XM_007966279.2, exon 8 of 8)	-1.29642	-	-	9.18624e-05	-	-	-	-	-	-	-	-	DMR	-	-
CNPY3	A0A0D9RGG3	Protein canopy homolog 3	signaling receptor binding [GO:0005102]	-	-	-	exon (XM_007972536.2, exon 4 of 6)	-1.08097	-	-	7.03785e-44	-	-	-	-	-2.61539	-	-	1.30442e-13	DMR	-	DEG
CNR1	A0A0D9SAB2	Cannabinoid receptor 1	actin cytoskeleton [GO:0015629]; GABA-ergic synapse [GO:0098982]; glutamatergic synapse [GO:0098978]; growth cone [GO:0030426]; mitochondrial outer membrane [GO:0005741]; presynaptic membrane [GO:0042734]; cannabinoid receptor activity [GO:0004949]; identical protein binding [GO:0042802]; adenylate cyclase-modulating G protein-coupled receptor signaling pathway [GO:0007188]; axonal fasciculation …	G-protein coupled receptor for cannabinoids, including endocannabinoids (eCBs), such as N-arachidonoylethanolamide (also called anandamide or AEA) and 2-arachidonoylglycerol (2-AG). Signaling typically involves reduction in cyclic AMP. {ECO:0000256|PIRNR:PIRNR037995}.	-	-	exon (XM_008006566.2, exon 2 of 2)	-	-3.73663	-	-	0.0149722	-	-	-	-	-	-	-	-	DMR	-
CNTF	A0A0D9R138	Ciliary neurotrophic factor	axon [GO:0030424]; cytoplasm [GO:0005737]; extracellular space [GO:0005615]; ciliary neurotrophic factor receptor binding [GO:0005127]; cytokine activity [GO:0005125]; growth factor activity [GO:0008083]; interleukin-6 receptor binding [GO:0005138]; protein-containing complex binding [GO:0044877]; astrocyte activation [GO:0048143]; cell surface receptor signaling pathway via STAT [GO:0097696]; ci…	CNTF is a survival factor for various neuronal cell types. Seems to prevent the degeneration of motor axons after axotomy. {ECO:0000256|ARBA:ARBA00025427}.	-	-	exon (XM_007997690.2, exon 2 of 2)	2.17304	-	-	0.00142244	-	-	-	-	1.01671	-	-	0.0362541	DMR	-	DEG
CNTFR	A0A0D9RCM9	Ciliary neurotrophic factor receptor subunit alpha	apical plasma membrane [GO:0016324]; ciliary neurotrophic factor receptor complex [GO:0070110]; CNTFR-CLCF1 complex [GO:0097059]; external side of plasma membrane [GO:0009897]; ciliary neurotrophic factor receptor activity [GO:0004897]; interleukin-11 binding [GO:0019970]; interleukin-11 receptor activity [GO:0004921]; signaling receptor binding [GO:0005102]; brainstem development [GO:0003360]; m…	-	-	-	-	-	-	-	-	-	-	-	-	2.97004	-	-	0.00905319	-	-	DEG
CNTNAP2	-	-	-	-	-	-	exon (XM_037991094.1, exon 10 of 10)	1.28927	-	-	1.09559e-08	-	-	-	-	-2.822	-	-	5.47493e-07	DMR	-	DEG
COA1	A0A0D9RSD3	Cytochrome c oxidase assembly factor 1	cytosol [GO:0005829]; mitochondrial inner membrane [GO:0005743]; mitochondrial cytochrome c oxidase assembly [GO:0033617]; mitochondrial respiratory chain complex I assembly [GO:0032981]	-	-	-	-	-	-	-	-	-	-	-	-	-1.40378	-	-	0.0121635	-	-	DEG
COA3	-	-	-	-	-	-	-	-	-	-	-	-	-	-	-	-1.78312	-	-	0.00022414	-	-	DEG
COA4	A0A0D9QVM6	Cytochrome c oxidase assembly factor 4 homolog	mitochondrial intermembrane space [GO:0005758]; mitochondrial cytochrome c oxidase assembly [GO:0033617]	-	-	-	exon (XM_008020114.2, exon 2 of 2)	-	-1.09458	-	-	0.000374671	-	-	-	-	-	-	-	-	DMR	-
COA5	A0A0D9RXD4	Cytochrome c oxidase assembly factor 5	mitochondrion [GO:0005739]; leukocyte differentiation [GO:0002521]; mitochondrial cytochrome c oxidase assembly [GO:0033617]; multicellular organism growth [GO:0035264]; spleen development [GO:0048536]; thymus development [GO:0048538]	Involved in an early step of the mitochondrial complex IV assembly process. {ECO:0000256|ARBA:ARBA00003186}.	-	-	TTS (XM_038004181.1)	-1.18105	-	-	4.33527e-06	-	-	-	-	-	-	-	-	DMR	-	-
COASY	A0A0D9S1S2	Coenzyme A synthase	mitochondrial matrix [GO:0005759]; mitochondrial outer membrane [GO:0005741]; ATP binding [GO:0005524]; dephospho-CoA kinase activity [GO:0004140]; pantetheine-phosphate adenylyltransferase activity [GO:0004595]; coenzyme A biosynthetic process [GO:0015937]; purine nucleoside bisphosphate biosynthetic process [GO:0034033]; purine ribonucleotide biosynthetic process [GO:0009152]; ribonucleoside bi…	-	-	-	exon (XM_008012625.2, exon 1 of 9)	-1.20099	-	-	0.024923	-	-	-	-	-	-	-	-	DMR	-	-
COASY	A0A0D9S1S2	Coenzyme A synthase	mitochondrial matrix [GO:0005759]; mitochondrial outer membrane [GO:0005741]; ATP binding [GO:0005524]; dephospho-CoA kinase activity [GO:0004140]; pantetheine-phosphate adenylyltransferase activity [GO:0004595]; coenzyme A biosynthetic process [GO:0015937]; purine nucleoside bisphosphate biosynthetic process [GO:0034033]; purine ribonucleotide biosynthetic process [GO:0009152]; ribonucleoside bi…	-	-	-	exon (XM_008012625.2, exon 5 of 9)	-	-1.54019	-	-	0.00124498	-	-	-	-	-	-	-	-	DMR	-
COBL	A0A0D9RU13	Cordon-bleu WH2 repeat protein	actin filament [GO:0005884]; axonal growth cone [GO:0044295]; dendritic growth cone [GO:0044294]; neuronal cell body [GO:0043025]; perinuclear region of cytoplasm [GO:0048471]; plasma membrane [GO:0005886]; ruffle [GO:0001726]; terminal web [GO:1990357]; actin monomer binding [GO:0003785]; actin filament network formation [GO:0051639]; actin filament polymerization [GO:0030041]; collateral sprout…	-	-	-	exon (XM_007981295.2, exon 14 of 14)	-1.5907	-	-	0.0237233	-	-	-	-	-	-	-	-	DMR	-	-
COL12A1	A0A0D9RNM7	Collagen type XII alpha 1 chain	collagen trimer [GO:0005581]; endoplasmic reticulum lumen [GO:0005788]; extracellular region [GO:0005576]; cell adhesion [GO:0007155]; endodermal cell differentiation [GO:0035987]	-	-	-	exon (XM_008013471.2, exon 10 of 66)	1.09747	-	-	0.00716255	-	-	-	-	-	-	-	-	DMR	-	-
COL12A1	A0A0D9RNM7	Collagen type XII alpha 1 chain	collagen trimer [GO:0005581]; endoplasmic reticulum lumen [GO:0005788]; extracellular region [GO:0005576]; cell adhesion [GO:0007155]; endodermal cell differentiation [GO:0035987]	-	-	-	exon (XM_008013471.2, exon 5 of 66)	1.39312	-	-	6.44737e-07	-	-	-	-	-	-	-	-	DMR	-	-
COL18A1	-	-	-	-	-	-	-	-	-	-	-	-	-	-	-	-1.87879	-	-	0.00252131	-	-	DEG
COL20A1	A0A0D9RUT8	Collagen type XX alpha 1 chain	collagen trimer [GO:0005581]; endoplasmic reticulum lumen [GO:0005788]; extracellular region [GO:0005576]	-	-	-	-	-	-	-	-	-	-	-	-	3.22884	-	-	0.0139582	-	-	DEG
COL27A1	A0A0D9RJJ0	Collagen type XXVII alpha 1 chain	endoplasmic reticulum lumen [GO:0005788]; extracellular region [GO:0005576]; fibrillar collagen trimer [GO:0005583]; extracellular matrix structural constituent [GO:0005201]; extracellular matrix organization [GO:0030198]; growth plate cartilage chondrocyte development [GO:0003431]	-	-	-	exon (XM_007968312.2, exon 61 of 61)	-	1.84774	-	-	0.000446989	-	-	-	1.09297	-	-	0.0119952	-	DMR	DEG
COL5A1	A0A0D9RSU9	Collagen type V alpha 1 chain	basement membrane [GO:0005604]; collagen type V trimer [GO:0005588]; endoplasmic reticulum lumen [GO:0005788]; extracellular space [GO:0005615]; extracellular matrix structural constituent conferring tensile strength [GO:0030020]; heparin binding [GO:0008201]; platelet-derived growth factor binding [GO:0048407]; proteoglycan binding [GO:0043394]; blood vessel development [GO:0001568]; cell adhesi…	-	-	-	exon (XM_037986995.1, exon 42 of 68)	1.37556	-	-	4.89718e-56	-	-	-	-	-	-	-	-	DMR	-	-
COL5A1	A0A0D9RSU9	Collagen type V alpha 1 chain	basement membrane [GO:0005604]; collagen type V trimer [GO:0005588]; endoplasmic reticulum lumen [GO:0005788]; extracellular space [GO:0005615]; extracellular matrix structural constituent conferring tensile strength [GO:0030020]; heparin binding [GO:0008201]; platelet-derived growth factor binding [GO:0048407]; proteoglycan binding [GO:0043394]; blood vessel development [GO:0001568]; cell adhesi…	-	-	-	exon (XM_037986995.1, exon 43 of 68)	1.44802	-	-	1.27501e-83	-	-	-	-	-	-	-	-	DMR	-	-
COL5A1	A0A0D9RSU9	Collagen type V alpha 1 chain	basement membrane [GO:0005604]; collagen type V trimer [GO:0005588]; endoplasmic reticulum lumen [GO:0005788]; extracellular space [GO:0005615]; extracellular matrix structural constituent conferring tensile strength [GO:0030020]; heparin binding [GO:0008201]; platelet-derived growth factor binding [GO:0048407]; proteoglycan binding [GO:0043394]; blood vessel development [GO:0001568]; cell adhesi…	-	-	-	exon (XM_037986995.1, exon 67 of 68)	2.64128	-	-	3.56355e-113	-	-	-	-	-	-	-	-	DMR	-	-
COL5A2	A0A0D9RJ27	Collagen type V alpha 2 chain	collagen type V trimer [GO:0005588]; endoplasmic reticulum lumen [GO:0005788]; extracellular space [GO:0005615]; extracellular matrix structural constituent [GO:0005201]; metal ion binding [GO:0046872]; SMAD binding [GO:0046332]; cellular response to amino acid stimulus [GO:0071230]; collagen fibril organization [GO:0030199]; eye morphogenesis [GO:0048592]; negative regulation of endodermal cell …	-	-	-	exon (XM_007965604.2, exon 43 of 54)	-1.03037	-	-	4.53664e-59	-	-	-	-	-	-	-	-	DMR	-	-
COL7A1	A0A0D9RSP0	Collagen type VII alpha 1 chain	collagen trimer [GO:0005581]; serine-type endopeptidase inhibitor activity [GO:0004867]; endodermal cell differentiation [GO:0035987]	-	-	-	exon (XM_007984132.2, exon 47 of 118)	1.14424	-	-	4.19095e-33	-	-	-	-	-	-	-	-	DMR	-	-
COL8A1	A0A0D9R128	Collagen type VIII alpha 1 chain	collagen trimer [GO:0005581]; extracellular region [GO:0005576]; camera-type eye morphogenesis [GO:0048593]; endodermal cell differentiation [GO:0035987]; endothelial cell proliferation [GO:0001935]; positive regulation of cell-substrate adhesion [GO:0010811]	-	-	-	-	-	-	-	-	-	-	-	-	-3.36943	-	-	2.0492e-07	-	-	DEG
COL9A3	-	-	-	-	-	-	-	-	-	-	-	-	-	-	-	3.6472	-	-	0.00217248	-	-	DEG
COLEC12	A0A0D9RYG4	Collectin-12	collagen trimer [GO:0005581]; membrane [GO:0016020]; carbohydrate binding [GO:0030246]; low-density lipoprotein particle binding [GO:0030169]; pattern recognition receptor activity [GO:0038187]; scavenger receptor activity [GO:0005044]; cellular response to exogenous dsRNA [GO:0071360]; defense response to bacterium [GO:0042742]; innate immune response [GO:0045087]; phagocytosis, recognition [GO:…	-	-	-	TTS (XM_007974491.2)	-1.16843	-	-	1.27253e-13	-	-	-	-	-	-	-	-	DMR	-	-
COLGALT1	A0A0D9QZT4	procollagen galactosyltransferase (EC 2.4.1.50)	endoplasmic reticulum lumen [GO:0005788]; procollagen galactosyltransferase activity [GO:0050211]; positive regulation of collagen fibril organization [GO:1904028]	-	-	-	-	-	-	-	-	-	-	-	-	-1.71355	-	-	4.31926e-05	-	-	DEG
COLQ	-	-	-	-	-	-	-	-	-	-	-	-	-	-	-	2.70201	-	-	0.00901313	-	-	DEG
COMMD2	A0A0D9RGH2	COMM domain containing 2	0	-	-	-	exon (XM_008008745.2, exon 4 of 5)	1.32086	-	-	1.98799e-11	-	-	-	-	-	-	-	-	DMR	-	-
COMMD2	A0A0D9RGH2	COMM domain containing 2	0	-	-	-	exon (XM_008008745.2, exon 5 of 5)	1.0456	-	-	0.0018698	-	-	-	-	-	-	-	-	DMR	-	-
COMMD3	-	-	-	-	-	-	-	-	-	-	-	-	-	-	-	-1.11173	-	-	0.0350813	-	-	DEG
COMMD4	A0A0D9RPH0	COMM domain containing 4	cytosol [GO:0005829]; intracellular membrane-bounded organelle [GO:0043231]; plasma membrane [GO:0005886]	-	-	-	-	-	-	-	-	-	-	-	-	-1.79356	-	-	0.00346503	-	-	DEG
COMMD6	A0A0D9RYD8	COMM domain-containing protein 6	NF-kappaB binding [GO:0051059]	-	-	-	-	-	-	-	-	-	-	-	-	-1.3358	-	-	0.00258571	-	-	DEG
COPE	A0A0D9QYY6	Coatomer subunit epsilon	COPI vesicle coat [GO:0030126]; Golgi membrane [GO:0000139]; nucleoplasm [GO:0005654]; structural molecule activity [GO:0005198]; endoplasmic reticulum to Golgi vesicle-mediated transport [GO:0006888]; intra-Golgi vesicle-mediated transport [GO:0006891]; protein localization to axon [GO:0099612]; protein transport [GO:0015031]; retrograde vesicle-mediated transport, Golgi to endoplasmic reticulum…	The coatomer is a cytosolic protein complex that binds to dilysine motifs and reversibly associates with Golgi non-clathrin-coated vesicles, which further mediate biosynthetic protein transport from the ER, via the Golgi up to the trans Golgi network. The coatomer complex is required for budding from Golgi membranes, and is essential for the retrograde Golgi-to-ER transport of dilysine-tagged pro…	-	-	exon (XM_007995843.2, exon 7 of 10)	-	-1.19198	-	-	4.10926e-08	-	-	-	-1.73569	-	-	0.00123235	-	DMR	DEG
COPE	A0A0D9QYY6	Coatomer subunit epsilon	COPI vesicle coat [GO:0030126]; Golgi membrane [GO:0000139]; nucleoplasm [GO:0005654]; structural molecule activity [GO:0005198]; endoplasmic reticulum to Golgi vesicle-mediated transport [GO:0006888]; intra-Golgi vesicle-mediated transport [GO:0006891]; protein localization to axon [GO:0099612]; protein transport [GO:0015031]; retrograde vesicle-mediated transport, Golgi to endoplasmic reticulum…	The coatomer is a cytosolic protein complex that binds to dilysine motifs and reversibly associates with Golgi non-clathrin-coated vesicles, which further mediate biosynthetic protein transport from the ER, via the Golgi up to the trans Golgi network. The coatomer complex is required for budding from Golgi membranes, and is essential for the retrograde Golgi-to-ER transport of dilysine-tagged pro…	-	-	exon (XM_007995843.2, exon 4 of 10)	-	-1.05724	-	-	3.69975e-07	-	-	-	-1.73569	-	-	0.00123235	-	DMR	DEG
COPG1	A0A0D9R8Z8	Coatomer subunit gamma	COPI vesicle coat [GO:0030126]; endoplasmic reticulum [GO:0005783]; endoplasmic reticulum-Golgi intermediate compartment [GO:0005793]; Golgi membrane [GO:0000139]; structural molecule activity [GO:0005198]; endoplasmic reticulum to Golgi vesicle-mediated transport [GO:0006888]; intra-Golgi vesicle-mediated transport [GO:0006891]; intracellular protein transport [GO:0006886]; organelle transport a…	The coatomer is a cytosolic protein complex that binds to dilysine motifs and reversibly associates with Golgi non-clathrin-coated vesicles, which further mediate biosynthetic protein transport from the ER, via the Golgi up to the trans Golgi network. Coatomer complex is required for budding from Golgi membranes, and is essential for the retrograde Golgi-to-ER transport of dilysine-tagged protein…	-	-	-	-	-	-	-	-	-	-	-	-1.8269	-	-	0.000651938	-	-	DEG
COPG2	A0A0D9RBF1	Coatomer subunit gamma	COPI vesicle coat [GO:0030126]; endoplasmic reticulum [GO:0005783]; endoplasmic reticulum-Golgi intermediate compartment [GO:0005793]; Golgi membrane [GO:0000139]; growth cone [GO:0030426]; structural molecule activity [GO:0005198]; endoplasmic reticulum to Golgi vesicle-mediated transport [GO:0006888]; intra-Golgi vesicle-mediated transport [GO:0006891]; intracellular protein transport [GO:00068…	The coatomer is a cytosolic protein complex that binds to dilysine motifs and reversibly associates with Golgi non-clathrin-coated vesicles, which further mediate biosynthetic protein transport from the ER, via the Golgi up to the trans Golgi network. Coatomer complex is required for budding from Golgi membranes, and is essential for the retrograde Golgi-to-ER transport of dilysine-tagged protein…	-	-	-	-	-	-	-	-	-	-	-	-1.32255	-	-	0.0229191	-	-	DEG
COPS6	A0A0D9RZ17	COP9 signalosome complex subunit 6	COP9 signalosome [GO:0008180]; cytoplasm [GO:0005737]; nucleoplasm [GO:0005654]; metallopeptidase activity [GO:0008237]; protein deneddylation [GO:0000338]	Component of the COP9 signalosome complex (CSN), a complex involved in various cellular and developmental processes. {ECO:0000256|RuleBase:RU367006}.	-	-	-	-	-	-	-	-	-	-	-	-1.69943	-	-	0.000725255	-	-	DEG
COPS9	-	-	-	-	-	-	-	-	-	-	-	-	-	-	-	-1.52659	-	-	0.00316822	-	-	DEG
COPZ1	A0A0D9QZD1	Coatomer subunit zeta	COPI vesicle coat [GO:0030126]; Golgi membrane [GO:0000139]; intra-Golgi vesicle-mediated transport [GO:0006891]; intracellular protein transport [GO:0006886]; retrograde vesicle-mediated transport, Golgi to endoplasmic reticulum [GO:0006890]	The coatomer is a cytosolic protein complex that binds to dilysine motifs and reversibly associates with Golgi non-clathrin-coated vesicles, which further mediate biosynthetic protein transport from the ER, via the Golgi up to the trans Golgi network. Coatomer complex is required for budding from Golgi membranes, and is essential for the retrograde Golgi-to-ER transport of dilysine-tagged protein…	-	-	-	-	-	-	-	-	-	-	-	-1.38044	-	-	0.00233096	-	-	DEG
COQ10A	A0A0D9QYR6	Coenzyme Q10A	mitochondrion [GO:0005739]; ubiquinone binding [GO:0048039]; cellular respiration [GO:0045333]	Required for the function of coenzyme Q in the respiratory chain. May serve as a chaperone or may be involved in the transport of Q6 from its site of synthesis to the catalytic sites of the respiratory complexes. {ECO:0000256|ARBA:ARBA00024947}.	-	-	-	-	-	-	-	-	-	-	-	-2.44312	-	-	0.0112006	-	-	DEG
COQ10B	A0A0D9RGE6	Coenzyme Q-binding protein COQ10 homolog B, mitochondrial	mitochondrial inner membrane [GO:0005743]; ubiquinone binding [GO:0048039]; cellular respiration [GO:0045333]	Required for the function of coenzyme Q in the respiratory chain. May serve as a chaperone or may be involved in the transport of Q6 from its site of synthesis to the catalytic sites of the respiratory complexes. {ECO:0000256|ARBA:ARBA00024947}.	-	-	intron (XM_007965741.2, intron 1 of 4)	1.08953	-	-	1.13099e-07	-	-	-	-	-	-	-	-	DMR	-	-
COQ2	A0A0D9QWL7	4-hydroxybenzoate polyprenyltransferase, mitochondrial (4-HB polyprenyltransferase) (EC 2.5.1.39) (Para-hydroxybenzoate--polyprenyltransferase) (PHB:PPT) (PHB:polyprenyltransferase)	mitochondrial inner membrane [GO:0005743]; 4-hydroxybenzoate polyprenyltransferase activity [GO:0008412]; glycerol metabolic process [GO:0006071]; isoprenoid biosynthetic process [GO:0008299]; ubiquinone biosynthetic process [GO:0006744]	Catalyzes the prenylation of para-hydroxybenzoate (PHB) with an all-trans polyprenyl group. Mediates the second step in the final reaction sequence of coenzyme Q (CoQ) biosynthesis, which is the condensation of the polyisoprenoid side chain with PHB, generating the first membrane-bound Q intermediate. {ECO:0000256|HAMAP-Rule:MF_03189}.	-	-	exon (XM_007999104.2, exon 8 of 8)	-1.26808	-	-	0.00164919	-	-	-	-	-2.45731	-	-	0.0144555	DMR	-	DEG
COQ5	A0A0D9S4J4	2-methoxy-6-polyprenyl-1,4-benzoquinol methylase, mitochondrial (EC 2.1.1.201) (Ubiquinone biosynthesis methyltransferase COQ5)	extrinsic component of mitochondrial inner membrane [GO:0031314]; mitochondrial matrix [GO:0005759]; ubiquinone biosynthesis complex [GO:0110142]; 2-polyprenyl-6-methoxy-1,4-benzoquinone methyltransferase activity [GO:0008425]; methylation [GO:0032259]	Methyltransferase required for the conversion of 2-polyprenyl-6-methoxy-1,4-benzoquinol (DDMQH2) to 2-polyprenyl-3-methyl-6-methoxy-1,4-benzoquinol (DMQH2). {ECO:0000256|HAMAP-Rule:MF_03191}.	-	-	exon (XM_008004947.1, exon 7 of 7)	-1.0665	-	-	1.76678e-06	-	-	-	-	-	-	-	-	DMR	-	-
COQ7	A0A0D9R654	5-demethoxyubiquinone hydroxylase, mitochondrial (DMQ hydroxylase) (EC 1.14.99.60) (Timing protein clk-1 homolog) (Ubiquinone biosynthesis monooxygenase COQ7)	extrinsic component of mitochondrial inner membrane [GO:0031314]; nucleus [GO:0005634]; ubiquinone biosynthesis complex [GO:0110142]; 3-demethoxyubiquinol 3-hydroxylase activity [GO:0008682]; metal ion binding [GO:0046872]; oxidoreductase activity, acting on paired donors, with incorporation or reduction of molecular oxygen, NAD(P)H as one donor, and incorporation of one atom of oxygen [GO:001670…	Catalyzes the hydroxylation of 2-polyprenyl-3-methyl-6-methoxy-1,4-benzoquinol (DMQH2) during ubiquinone biosynthesis. Has also a structural role in the COQ enzyme complex, stabilizing other COQ polypeptides. Involved in lifespan determination in a ubiquinone-independent manner. {ECO:0000256|HAMAP-Rule:MF_03194}.	-	-	-	-	-	-	-	-	-	-	-	-1.5719	-	-	1.36004e-05	-	-	DEG
COQ9	A0A0D9QXZ1	Ubiquinone biosynthesis protein	mitochondrial inner membrane [GO:0005743]; ubiquinone biosynthesis complex [GO:0110142]; lipid binding [GO:0008289]; protein homodimerization activity [GO:0042803]; mitochondrial electron transport, NADH to ubiquinone [GO:0006120]; ubiquinone biosynthetic process [GO:0006744]	Lipid-binding protein involved in the biosynthesis of coenzyme Q, also named ubiquinone, an essential lipid-soluble electron transporter for aerobic cellular respiration. {ECO:0000256|RuleBase:RU366063}.	-	-	exon (XM_007993436.2, exon 4 of 9)	-	-1.1527	-	-	4.38204e-15	-	-	-	-1.30172	-	-	0.00782363	-	DMR	DEG
CORO1B	A0A0D9R8C6	Coronin	actin filament [GO:0005884]; cytosol [GO:0005829]; glutamatergic synapse [GO:0098978]; lamellipodium [GO:0030027]; perinuclear region of cytoplasm [GO:0048471]; plasma membrane [GO:0005886]; stress fiber [GO:0001725]; actin filament binding [GO:0051015]; Arp2/3 complex binding [GO:0071933]; identical protein binding [GO:0042802]; actin filament branching [GO:0090135]; actin filament bundle assemb…	Regulates leading edge dynamics and cell motility in fibroblasts. May be involved in cytokinesis and signal transduction. {ECO:0000256|ARBA:ARBA00024891}.	-	-	exon (XM_007966072.2, exon 7 of 11)	-	-1.09069	-	-	8.18194e-05	-	-	-	-1.5159	-	-	0.00148784	-	DMR	DEG
COTL1	A0A0D9S1W8	Coactosin like F-actin binding protein 1	actin filament [GO:0005884]; cortical actin cytoskeleton [GO:0030864]; cytosol [GO:0005829]; site of polarized growth [GO:0030427]; actin filament binding [GO:0051015]; enzyme binding [GO:0019899]; defense response to fungus [GO:0050832]; regulation of actin filament polymerization [GO:0030833]	-	-	-	-	-	-	-	-	-	-	-	-	-4.49246	-	-	2.46299e-06	-	-	DEG
COX10	A0A0D9R9J0	Protoheme IX farnesyltransferase, mitochondrial (EC 2.5.1.-) (Heme O synthase)	cytochrome complex [GO:0070069]; cytosol [GO:0005829]; mitochondrial matrix [GO:0005759]; mitochondrial membrane [GO:0031966]; nucleolus [GO:0005730]; farnesyltranstransferase activity [GO:0004311]; protoheme IX farnesyltransferase activity [GO:0008495]; aerobic respiration [GO:0009060]; copper ion homeostasis [GO:0055070]; heme A biosynthetic process [GO:0006784]; heme O biosynthetic process [GO…	Converts protoheme IX and farnesyl diphosphate to heme O. {ECO:0000256|PIRNR:PIRNR001773}.	-	-	-	-	-	-	-	-	-	-	-	1.04208	-	-	0.00249787	-	-	DEG
COX16	A0A0D9RKP2	Cytochrome c oxidase assembly protein COX16 homolog, mitochondrial	mitochondrial inner membrane [GO:0005743]; mitochondrial cytochrome c oxidase assembly [GO:0033617]	-	-	-	-	-	-	-	-	-	-	-	-	-1.17004	-	-	0.0284482	-	-	DEG
COX20	A0A0D9RA41	Cytochrome c oxidase assembly protein COX20, mitochondrial	mitochondrial inner membrane [GO:0005743]; mitochondrial cytochrome c oxidase assembly [GO:0033617]	-	-	-	promoter-TSS (XM_007990008.2)	1.10227	-	-	7.10112e-08	-	-	-	-	-	-	-	-	DMR	-	-
COX5A	A0A0D9RPD6	Cytochrome c oxidase subunit 5A, mitochondrial (Cytochrome c oxidase polypeptide Va)	mitochondrial inner membrane [GO:0005743]; respiratory chain complex IV [GO:0045277]; metal ion binding [GO:0046872]; mitochondrial electron transport, cytochrome c to oxygen [GO:0006123]	Component of the cytochrome c oxidase, the last enzyme in the mitochondrial electron transport chain which drives oxidative phosphorylation. The respiratory chain contains 3 multisubunit complexes succinate dehydrogenase (complex II, CII), ubiquinol-cytochrome c oxidoreductase (cytochrome b-c1 complex, complex III, CIII) and cytochrome c oxidase (complex IV, CIV), that cooperate to transfer elect…	-	-	-	-	-	-	-	-	-	-	-	-2.11106	-	-	0.0037874	-	-	DEG
COX5B	A0A0D9RXI1	Cytochrome c oxidase subunit 5B, mitochondrial (Cytochrome c oxidase polypeptide Vb)	mitochondrial inner membrane [GO:0005743]; respiratory chain complex IV [GO:0045277]; metal ion binding [GO:0046872]; mitochondrial electron transport, cytochrome c to oxygen [GO:0006123]	-	-	-	-	-	-	-	-	-	-	-	-	-2.88406	-	-	6.60265e-19	-	-	DEG
COX6A1	-	-	-	-	-	-	-	-	-	-	-	-	-	-	-	-2.03814	-	-	8.54797e-06	-	-	DEG
COX7A2	A0A0D9RPS3	Cytochrome c oxidase subunit 7A2, mitochondrial (Cytochrome c oxidase subunit VIIa-liver/heart)	mitochondrial inner membrane [GO:0005743]; respiratory chain complex IV [GO:0045277]; oxidoreductase activity [GO:0016491]; mitochondrial electron transport, cytochrome c to oxygen [GO:0006123]; mitochondrial respirasome assembly [GO:0097250]; regulation of oxidative phosphorylation [GO:0002082]	-	-	-	-	-	-	-	-	-	-	-	-	-1.46426	-	-	0.0276109	-	-	DEG
COX7B	-	-	-	-	-	-	-	-	-	-	-	-	-	-	-	-3.02454	-	-	3.37104e-08	-	-	DEG
CPD	A0A0D9R396	Carboxypeptidase D (EC 3.4.17.22) (Metallocarboxypeptidase D)	extracellular space [GO:0005615]; membrane [GO:0016020]; metallocarboxypeptidase activity [GO:0004181]; zinc ion binding [GO:0008270]; peptide metabolic process [GO:0006518]; protein processing [GO:0016485]	-	-	-	exon (XM_037992668.1, exon 22 of 22)	-	1.12062	-	-	1.41902e-06	-	-	-	-1.85698	-	-	4.02679e-06	-	DMR	DEG
CPE	A0A0D9S1Y3	Carboxypeptidase E (EC 3.4.17.10) (Carboxypeptidase H) (Enkephalin convertase) (Prohormone-processing carboxypeptidase)	extracellular space [GO:0005615]; Golgi apparatus [GO:0005794]; transport vesicle membrane [GO:0030658]; cell adhesion molecule binding [GO:0050839]; metallocarboxypeptidase activity [GO:0004181]; neurexin family protein binding [GO:0042043]; zinc ion binding [GO:0008270]; cardiac left ventricle morphogenesis [GO:0003214]; peptide metabolic process [GO:0006518]; protein localization to membrane […	Sorting receptor that directs prohormones to the regulated secretory pathway. Acts also as a prohormone processing enzyme in neuro/endocrine cells, removing dibasic residues from the C-terminal end of peptide hormone precursors after initial endoprotease cleavage. {ECO:0000256|ARBA:ARBA00024011}.	-	-	exon (XM_008000209.2, exon 9 of 9)	1.92387	-	-	0.00786912	-	-	-	-	-2.66703	-	-	0.002677	DMR	-	DEG
CPEB3	A0A0D9R2M9	Cytoplasmic polyadenylation element binding protein 3	CCR4-NOT complex [GO:0030014]; cytosol [GO:0005829]; midbody [GO:0030496]; neuron projection [GO:0043005]; nucleoplasm [GO:0005654]; plasma membrane [GO:0005886]; synapse [GO:0045202]; mRNA 3'-UTR binding [GO:0003730]; mRNA regulatory element binding translation repressor activity [GO:0000900]; ribosome binding [GO:0043022]; translation factor activity, RNA binding [GO:0008135]; 3'-UTR-mediated m…	-	-	-	-	-	-	-	-	-	-	-	-	1.38063	-	-	0.0466631	-	-	DEG
CPEB4	A0A0D9RAY2	Cytoplasmic polyadenylation element binding protein 4	dendrite [GO:0030425]; endoplasmic reticulum [GO:0005783]; nucleus [GO:0005634]; postsynaptic density [GO:0014069]; mRNA 3'-UTR binding [GO:0003730]; mRNA regulatory element binding translation repressor activity [GO:0000900]; ribosome binding [GO:0043022]; translation factor activity, RNA binding [GO:0008135]; cellular response to amino acid stimulus [GO:0071230]; negative regulation of cytoplas…	-	-	-	-	-	-	-	-	-	-	-	-	1.40446	-	-	0.00693263	-	-	DEG
CPLX1	A0A0D9RS50	Complexin-1	calyx of Held [GO:0044305]; cytosol [GO:0005829]; glutamatergic synapse [GO:0098978]; postsynapse [GO:0098794]; Schaffer collateral - CA1 synapse [GO:0098685]; SNARE complex [GO:0031201]; terminal bouton [GO:0043195]; syntaxin binding [GO:0019905]; insulin secretion [GO:0030073]; regulation of exocytic insertion of neurotransmitter receptor to postsynaptic membrane [GO:0099145]; regulation of neu…	-	-	-	exon (XM_008018193.2, exon 3 of 4)	-	1.18763	-	-	6.8637e-10	-	-	-	-	-	-	-	-	DMR	-
CPNE2	A0A0D9QY22	Copine 2	cytoplasm [GO:0005737]; nucleus [GO:0005634]; plasma membrane [GO:0005886]; calcium-dependent phospholipid binding [GO:0005544]; cellular response to calcium ion [GO:0071277]	-	-	-	-	-	-	-	-	-	-	-	-	-1.27211	-	-	0.00909772	-	-	DEG
CPNE3	A0A0D9RKP8	Copine 3	cytosol [GO:0005829]; focal adhesion [GO:0005925]; mitochondrion [GO:0005739]; nucleolus [GO:0005730]; nucleoplasm [GO:0005654]; plasma membrane [GO:0005886]; calcium-dependent phospholipid binding [GO:0005544]; calcium-dependent protein binding [GO:0048306]; protein serine/threonine kinase activity [GO:0004674]; receptor tyrosine kinase binding [GO:0030971]; cellular response to calcium ion [GO:…	-	-	-	-	-	-	-	-	-	-	-	-	-1.76994	-	-	0.000116703	-	-	DEG
CPOX	A0A0D9R116	coproporphyrinogen oxidase (EC 1.3.3.3)	cytosol [GO:0005829]; membrane [GO:0016020]; mitochondrial intermembrane space [GO:0005758]; coproporphyrinogen oxidase activity [GO:0004109]; protein homodimerization activity [GO:0042803]; structural constituent of eye lens [GO:0005212]; heme A biosynthetic process [GO:0006784]; heme B biosynthetic process [GO:0006785]; heme O biosynthetic process [GO:0048034]; protoporphyrinogen IX biosyntheti…	-	-	-	-	-	-	-	-	-	-	-	-	-1.02789	-	-	0.0145704	-	-	DEG
CPPED1	A0A0D9R746	Serine/threonine-protein phosphatase CPPED1 (EC 3.1.3.16) (Calcineurin-like phosphoesterase domain-containing protein 1)	cytosol [GO:0005829]; plasma membrane [GO:0005886]; calmodulin-dependent protein phosphatase activity [GO:0033192]; histone H2AXS140 phosphatase activity [GO:0140791]; MAP kinase serine/threonine phosphatase activity [GO:1990439]; myosin phosphatase activity [GO:0017018]; RNA polymerase II CTD heptapeptide repeat S2 phosphatase activity [GO:0180006]; RNA polymerase II CTD heptapeptide repeat S5 p…	Protein phosphatase that dephosphorylates AKT family kinase specifically at 'Ser-473', blocking cell cycle progression and promoting cell apoptosis. May play an inhibitory role in glucose uptake by adipocytes. {ECO:0000256|ARBA:ARBA00024771}.	-	-	-	-	-	-	-	-	-	-	-	-1.9091	-	-	0.00288175	-	-	DEG
CPT1A	A0A0D9R9L7	Carnitine palmitoyltransferase 1A	mitochondrial outer membrane [GO:0005741]; carnitine O-palmitoyltransferase activity [GO:0004095]; protein-macromolecule adaptor activity [GO:0030674]; carnitine metabolic process [GO:0009437]; epithelial cell differentiation [GO:0030855]; fatty acid beta-oxidation [GO:0006635]; long-chain fatty acid metabolic process [GO:0001676]; positive regulation of innate immune response [GO:0045089]	-	-	-	-	-	-	-	-	-	-	-	-	-1.23136	-	-	0.0391102	-	-	DEG
CPT1B	A0A0D9QXN4	Carnitine O-palmitoyltransferase 1, muscle isoform (EC 2.3.1.21) (Carnitine O-palmitoyltransferase I, muscle isoform) (Carnitine palmitoyltransferase 1B)	mitochondrial outer membrane [GO:0005741]; carnitine O-palmitoyltransferase activity [GO:0004095]; carnitine metabolic process [GO:0009437]; fatty acid beta-oxidation [GO:0006635]; long-chain fatty acid transport [GO:0015909]; response to blue light [GO:0009637]	Catalyzes the transfer of the acyl group of long-chain fatty acid-CoA conjugates onto carnitine, an essential step for the mitochondrial uptake of long-chain fatty acids and their subsequent beta-oxidation in the mitochondrion. {ECO:0000256|ARBA:ARBA00043926}.	-	-	-	-	-	-	-	-	-	-	-	2.68584	-	-	1.46094e-07	-	-	DEG
CPT2	A0A0D9S789	Carnitine O-palmitoyltransferase 2, mitochondrial (EC 2.3.1.21) (Carnitine palmitoyltransferase II)	mitochondrial inner membrane [GO:0005743]; nucleolus [GO:0005730]; nucleoplasm [GO:0005654]; carnitine O-palmitoyltransferase activity [GO:0004095]; carnitine metabolic process [GO:0009437]; fatty acid beta-oxidation [GO:0006635]; in utero embryonic development [GO:0001701]; long-chain fatty acid metabolic process [GO:0001676]; positive regulation of cold-induced thermogenesis [GO:0120162]	Involved in the intramitochondrial synthesis of acylcarnitines from accumulated acyl-CoA metabolites. Reconverts acylcarnitines back into the respective acyl-CoA esters that can then undergo beta-oxidation, an essential step for the mitochondrial uptake of long-chain fatty acids and their subsequent beta-oxidation in the mitochondrion. Active with medium (C8-C12) and long-chain (C14-C18) acyl-CoA…	-	-	exon (XM_007978713.2, exon 4 of 5)	-1.87891	-	-	0.00277022	-	-	-	-	-	-	-	-	DMR	-	-
CRACDL	A0A0D9RXC9	CRACD like	0	-	-	-	exon (XM_038004182.1, exon 10 of 10)	-1.32873	-	-	0.00572498	-	-	-	-	-	-	-	-	DMR	-	-
CRAMP1	A0A0D9RGH6	Cramped chromatin regulator homolog 1	nucleus [GO:0005634]; chromatin binding [GO:0003682]; DNA binding [GO:0003677]; pattern specification process [GO:0007389]	-	-	-	exon (XM_007981571.2, exon 22 of 22)	-	1.22084	-	-	0.00187656	-	-	-	1.53236	-	-	9.80017e-05	-	DMR	DEG
CREBRF	A0A0D9RB16	CREB3 regulatory factor	nucleoplasm [GO:0005654]; DNA-binding transcription activator activity, RNA polymerase II-specific [GO:0001228]; RNA polymerase II transcription regulatory region sequence-specific DNA binding [GO:0000977]; response to unfolded protein [GO:0006986]	-	-	-	-	-	-	-	-	-	-	-	-	1.49761	-	-	0.0426925	-	-	DEG
CRELD2	A0A0D9QYJ2	protein disulfide-isomerase (EC 5.3.4.1)	endoplasmic reticulum [GO:0005783]; extracellular space [GO:0005615]; Golgi apparatus [GO:0005794]; calcium ion binding [GO:0005509]; protein disulfide isomerase activity [GO:0003756]	-	-	-	-	-	-	-	-	-	-	-	-	-1.60826	-	-	0.0243674	-	-	DEG
CREM	A0A0D9RG23	cAMP-responsive element modulator	ATF4-CREB1 transcription factor complex [GO:1990589]; DNA-binding transcription repressor activity, RNA polymerase II-specific [GO:0001227]; RNA polymerase II cis-regulatory region sequence-specific DNA binding [GO:0000978]	-	-	-	exon (XM_008002792.2, exon 8 of 9)	-	-1.30234	-	-	8.01776e-05	-	-	-	-	-	-	-	-	DMR	-
CREM	A0A0D9RG23	cAMP-responsive element modulator	ATF4-CREB1 transcription factor complex [GO:1990589]; DNA-binding transcription repressor activity, RNA polymerase II-specific [GO:0001227]; RNA polymerase II cis-regulatory region sequence-specific DNA binding [GO:0000978]	-	-	-	exon (XM_008002792.2, exon 9 of 9)	-	-1.18217	-	-	0.00910385	-	-	-	-	-	-	-	-	DMR	-
CREM	A0A0D9RG23	cAMP-responsive element modulator	ATF4-CREB1 transcription factor complex [GO:1990589]; DNA-binding transcription repressor activity, RNA polymerase II-specific [GO:0001227]; RNA polymerase II cis-regulatory region sequence-specific DNA binding [GO:0000978]	-	-	-	promoter-TSS (XM_008002808.2)	-	-1.67441	-	-	0.0128666	-	-	-	-	-	-	-	-	DMR	-
CRIP1	A0A0D9RAI2	Cysteine rich protein 1	cytoplasm [GO:0005737]; peptide binding [GO:0042277]; zinc ion binding [GO:0008270]; cellular response to antibiotic [GO:0071236]; cellular response to UV-B [GO:0071493]; immune response [GO:0006955]; intrinsic apoptotic signaling pathway in response to DNA damage [GO:0008630]; prostate gland stromal morphogenesis [GO:0060741]; regulation of gene expression [GO:0010468]; response to zinc ion [GO:…	-	-	GO:0002376~immune system process;GO:0006955~immune response	-	-	-	-	-	-	-	-	-	-2.40312	-	-	0.000164557	-	-	DEG
CRIP2	A0A0D9RAJ1	Cysteine-rich protein 2	cell cortex [GO:0005938]; metal ion binding [GO:0046872]; hemopoiesis [GO:0030097]; positive regulation of cell population proliferation [GO:0008284]	-	-	-	-	-	-	-	-	-	-	-	-	-1.43775	-	-	0.0362981	-	-	DEG
CRLF3	A0A0D9R2L0	Cytokine receptor like factor 3	cytosol [GO:0005829]; plasma membrane [GO:0005886]; identical protein binding [GO:0042802]; negative regulation of cell growth [GO:0030308]; negative regulation of G1/S transition of mitotic cell cycle [GO:2000134]; positive regulation of receptor signaling pathway via JAK-STAT [GO:0046427]; positive regulation of transcription by RNA polymerase II [GO:0045944]	-	-	-	-	-	-	-	-	-	-	-	-	-1.13534	-	-	0.00948713	-	-	DEG
CRTC1	A0A0D9QZ25	CREB regulated transcription coactivator 1	cytosol [GO:0005829]; nuclear body [GO:0016604]; plasma membrane [GO:0005886]; cAMP response element binding protein binding [GO:0008140]; energy homeostasis [GO:0097009]; entrainment of circadian clock by photoperiod [GO:0043153]; memory [GO:0007613]; negative regulation of membrane hyperpolarization [GO:1902631]; positive regulation of transcription by RNA polymerase II [GO:0045944]	-	-	-	-	-	-	-	-	-	-	-	-	1.58525	-	-	3.07873e-06	-	-	DEG
CRY1	A0A0D9S2M0	Cryptochrome-1	mitochondrion [GO:0005739]; nucleus [GO:0005634]; E-box binding [GO:0070888]; FAD binding [GO:0071949]; histone deacetylase binding [GO:0042826]; nuclear receptor binding [GO:0016922]; phosphatase binding [GO:0019902]; photoreceptor activity [GO:0009881]; protein kinase binding [GO:0019901]; circadian regulation of gene expression [GO:0032922]; entrainment of circadian clock by photoperiod [GO:00…	-	-	-	-	-	-	-	-	-	-	-	-	1.1924	-	-	0.0177576	-	-	DEG
CRYGS	A0A0D9RNN2	Gamma-crystallin S (Beta-crystallin S) (Gamma-S-crystallin)	structural constituent of eye lens [GO:0005212]; lens development in camera-type eye [GO:0002088]; morphogenesis of an epithelium [GO:0002009]; visual perception [GO:0007601]	Crystallins are the dominant structural components of the vertebrate eye lens. {ECO:0000256|ARBA:ARBA00003689}.	-	-	-	-	-	-	-	-	-	-	-	2.52037	-	-	0.0152582	-	-	DEG
CRYL1	A0A0D9RZT9	L-gulonate 3-dehydrogenase (EC 1.1.1.45) (L-gulonate 3-dehydrogenase)	cytosol [GO:0005829]; L-gulonate 3-dehydrogenase activity [GO:0050104]; NAD+ binding [GO:0070403]; protein homodimerization activity [GO:0042803]; D-glucuronate catabolic process to D-xylulose 5-phosphate [GO:0019640]; fatty acid metabolic process [GO:0006631]	-	-	-	exon (XM_008021666.2, exon 8 of 8)	-1.31164	-	-	0.00169605	-	-	-	-	-	-	-	-	DMR	-	-
CSDE1	A0A0D9S679	Cold shock domain containing E1	CRD-mediated mRNA stability complex [GO:0070937]; Golgi apparatus [GO:0005794]; mCRD-mediated mRNA stability complex [GO:0106002]; plasma membrane [GO:0005886]; lncRNA binding [GO:0106222]; RISC complex binding [GO:1905172]; RNA stem-loop binding [GO:0035613]; CRD-mediated mRNA stabilization [GO:0070934]; IRES-dependent viral translational initiation [GO:0075522]; negative regulation of nuclear-t…	-	-	-	-	-	-	-	-	-	-	-	-	-1.02721	-	-	0.0409435	-	-	DEG
CSE1L	A0A0D9RR42	Exportin-2 (Chromosome segregation 1-like protein) (Importin-alpha re-exporter)	cytosol [GO:0005829]; nuclear envelope [GO:0005635]; nucleoplasm [GO:0005654]; nuclear export signal receptor activity [GO:0005049]; small GTPase binding [GO:0031267]; protein export from nucleus [GO:0006611]; protein import into nucleus [GO:0006606]	-	-	-	exon (XM_008014586.2, exon 3 of 25)	1.06139	-	-	6.65386e-13	-	-	-	-	-	-	-	-	DMR	-	-
CSE1L	A0A0D9RR42	Exportin-2 (Chromosome segregation 1-like protein) (Importin-alpha re-exporter)	cytosol [GO:0005829]; nuclear envelope [GO:0005635]; nucleoplasm [GO:0005654]; nuclear export signal receptor activity [GO:0005049]; small GTPase binding [GO:0031267]; protein export from nucleus [GO:0006611]; protein import into nucleus [GO:0006606]	-	-	-	exon (XM_008014586.2, exon 7 of 25)	1.34807	-	-	0.000104386	-	-	-	-	-	-	-	-	DMR	-	-
CSGALNACT2	A0A0D9REZ1	Hexosyltransferase (EC 2.4.1.-)	Golgi cisterna membrane [GO:0032580]; glucuronosyl-N-acetylgalactosaminyl-proteoglycan 4-beta-N-acetylgalactosaminyltransferase activity [GO:0047238]; chondroitin sulfate biosynthetic process [GO:0030206]; dermatan sulfate proteoglycan biosynthetic process [GO:0050651]	-	-	-	exon (XM_007962435.2, exon 8 of 8)	-	1.37172	-	-	0.00803841	-	-	-	-	-	-	-	-	DMR	-
CSNK1D	A0A0D9S4V6	non-specific serine/threonine protein kinase (EC 2.7.11.1)	centrosome [GO:0005813]; ciliary basal body [GO:0036064]; Golgi apparatus [GO:0005794]; perinuclear region of cytoplasm [GO:0048471]; plasma membrane [GO:0005886]; spindle microtubule [GO:0005876]; ATP binding [GO:0005524]; protein serine kinase activity [GO:0106310]; protein serine/threonine kinase activity [GO:0004674]; tau-protein kinase activity [GO:0050321]; Golgi organization [GO:0007030]; …	-	-	-	exon (XM_008013349.2, exon 5 of 9)	-	-1.30733	-	-	3.24222e-11	-	-	-	-	-	-	-	-	DMR	-
CSNK1D	A0A0D9S4V6	non-specific serine/threonine protein kinase (EC 2.7.11.1)	centrosome [GO:0005813]; ciliary basal body [GO:0036064]; Golgi apparatus [GO:0005794]; perinuclear region of cytoplasm [GO:0048471]; plasma membrane [GO:0005886]; spindle microtubule [GO:0005876]; ATP binding [GO:0005524]; protein serine kinase activity [GO:0106310]; protein serine/threonine kinase activity [GO:0004674]; tau-protein kinase activity [GO:0050321]; Golgi organization [GO:0007030]; …	-	-	-	exon (XM_008013349.2, exon 7 of 9)	-	-1.02778	-	-	0.000505174	-	-	-	-	-	-	-	-	DMR	-
CSNK1G3	A0A0D9RPY8	non-specific serine/threonine protein kinase (EC 2.7.11.1)	cytoplasm [GO:0005737]; 3-phosphoinositide-dependent protein kinase activity [GO:0004676]; AMP-activated protein kinase activity [GO:0004679]; ATP binding [GO:0005524]; DNA-dependent protein kinase activity [GO:0004677]; eukaryotic translation initiation factor 2alpha kinase activity [GO:0004694]; histone H2AS1 kinase activity [GO:0044024]; histone H2AS121 kinase activity [GO:0072371]; histone H2…	-	-	-	intron (XM_038008494.1, intron 1 of 15)	-1.35462	-1.53126	-	0.00531802	0.00140527	-	-	-	-	-	-	-	DMR	DMR	-
CSNK2B	A0A0D9R898	Casein kinase II subunit beta (CK II beta)	chromatin [GO:0000785]; cytoplasm [GO:0005737]; PcG protein complex [GO:0031519]; plasma membrane [GO:0005886]; PML body [GO:0016605]; protein kinase CK2 complex [GO:0005956]; chromatin binding [GO:0003682]; identical protein binding [GO:0042802]; protein domain specific binding [GO:0019904]; protein kinase regulator activity [GO:0019887]; protein serine/threonine kinase activity [GO:0004674]; pr…	Regulatory subunit of casein kinase II/CK2. As part of the kinase complex regulates the basal catalytic activity of the alpha subunit a constitutively active serine/threonine-protein kinase that phosphorylates a large number of substrates containing acidic residues C-terminal to the phosphorylated serine or threonine. Participates in Wnt signaling. {ECO:0000256|ARBA:ARBA00045844, ECO:0000256|Rule…	-	-	-	-	-	-	-	-	-	-	-	-1.75155	-	-	0.000204694	-	-	DEG
CSRNP1	A0A0D9RQL3	Cysteine and serine rich nuclear protein 1	nucleus [GO:0005634]; DNA-binding transcription activator activity, RNA polymerase II-specific [GO:0001228]; sequence-specific DNA binding [GO:0043565]; apoptotic process [GO:0006915]; face morphogenesis [GO:0060325]; platelet-derived growth factor receptor signaling pathway [GO:0048008]; post-embryonic development [GO:0009791]; roof of mouth development [GO:0060021]; skeletal system morphogenesi…	-	-	-	exon (XM_007971714.2, exon 5 of 5)	-	1.527	-	-	0.00766756	-	1.88619	-	3.31249	0.0339041	-	6.71173e-06	DEG	DMR	DEG
CSRNP2	A0A0D9R0T0	Cysteine and serine rich nuclear protein 2	nucleus [GO:0005634]; DNA-binding transcription activator activity, RNA polymerase II-specific [GO:0001228]; phosphatase binding [GO:0019902]; sequence-specific DNA binding [GO:0043565]; apoptotic process [GO:0006915]	-	-	-	exon (XM_008003249.2, exon 3 of 5)	-1.28414	-	-	0.00960902	-	-	-	-	-	-	-	-	DMR	-	-
CSRP1	A0A0D9RNF7	Cysteine and glycine-rich protein 1 (Cysteine-rich protein 1)	nucleus [GO:0005634]; Z disc [GO:0030018]; actinin binding [GO:0042805]; metal ion binding [GO:0046872]; structural constituent of muscle [GO:0008307]; muscle tissue development [GO:0060537]; sarcomere organization [GO:0045214]	Could play a role in neuronal development. {ECO:0000256|ARBA:ARBA00037596}.	-	-	-	-	-	-	-	-	-	-	-	-2.43458	-	-	0.0136641	-	-	DEG
CST3	A0A0D9RF55	Cystatin C	extracellular space [GO:0005615]; Golgi apparatus [GO:0005794]; plasma membrane [GO:0005886]; vesicle [GO:0031982]; amyloid-beta binding [GO:0001540]; cysteine-type endopeptidase inhibitor activity [GO:0004869]; identical protein binding [GO:0042802]; protease binding [GO:0002020]; defense response [GO:0006952]; negative regulation of blood vessel remodeling [GO:0060313]; negative regulation of c…	-	-	-	-	-	-	-	-	-	-	-	-	-3.24003	-	-	8.24596e-06	-	-	DEG
CSTB	-	-	-	-	-	-	-	-	-	-	-	-	-	-	-	-1.39841	-	-	0.00189775	-	-	DEG
CTBP1	A0A0D9RST0	C-terminal binding protein 1	GABA-ergic synapse [GO:0098982]; glutamatergic synapse [GO:0098978]; nucleoplasm [GO:0005654]; presynaptic active zone cytoplasmic component [GO:0098831]; transcription repressor complex [GO:0017053]; chromatin binding [GO:0003682]; identical protein binding [GO:0042802]; NAD binding [GO:0051287]; oxidoreductase activity, acting on the CH-OH group of donors, NAD or NADP as acceptor [GO:0016616]; …	-	-	-	exon (XM_037983222.1, exon 3 of 9)	-	-1.71014	-	-	3.92836e-14	-	-	-	-	-	-	-	-	DMR	-
CTBP1	A0A0D9RST0	C-terminal binding protein 1	GABA-ergic synapse [GO:0098982]; glutamatergic synapse [GO:0098978]; nucleoplasm [GO:0005654]; presynaptic active zone cytoplasmic component [GO:0098831]; transcription repressor complex [GO:0017053]; chromatin binding [GO:0003682]; identical protein binding [GO:0042802]; NAD binding [GO:0051287]; oxidoreductase activity, acting on the CH-OH group of donors, NAD or NADP as acceptor [GO:0016616]; …	-	-	-	exon (XM_037983222.1, exon 4 of 9)	-1.43026	-1.20303	-	8.19838e-29	6.24964e-31	-	-	-	-	-	-	-	DMR	DMR	-
CTBP1	A0A0D9RST0	C-terminal binding protein 1	GABA-ergic synapse [GO:0098982]; glutamatergic synapse [GO:0098978]; nucleoplasm [GO:0005654]; presynaptic active zone cytoplasmic component [GO:0098831]; transcription repressor complex [GO:0017053]; chromatin binding [GO:0003682]; identical protein binding [GO:0042802]; NAD binding [GO:0051287]; oxidoreductase activity, acting on the CH-OH group of donors, NAD or NADP as acceptor [GO:0016616]; …	-	-	-	exon (XM_037983222.1, exon 6 of 9)	-1.4634	-	-	1.2001e-32	-	-	-	-	-	-	-	-	DMR	-	-
CTBP1	A0A0D9RST0	C-terminal binding protein 1	GABA-ergic synapse [GO:0098982]; glutamatergic synapse [GO:0098978]; nucleoplasm [GO:0005654]; presynaptic active zone cytoplasmic component [GO:0098831]; transcription repressor complex [GO:0017053]; chromatin binding [GO:0003682]; identical protein binding [GO:0042802]; NAD binding [GO:0051287]; oxidoreductase activity, acting on the CH-OH group of donors, NAD or NADP as acceptor [GO:0016616]; …	-	-	-	promoter-TSS (XM_037983222.1)	-	3.84559	-	-	3.17072e-26	-	-	-	-	-	-	-	-	DMR	-
CTBP1	A0A0D9RST0	C-terminal binding protein 1	GABA-ergic synapse [GO:0098982]; glutamatergic synapse [GO:0098978]; nucleoplasm [GO:0005654]; presynaptic active zone cytoplasmic component [GO:0098831]; transcription repressor complex [GO:0017053]; chromatin binding [GO:0003682]; identical protein binding [GO:0042802]; NAD binding [GO:0051287]; oxidoreductase activity, acting on the CH-OH group of donors, NAD or NADP as acceptor [GO:0016616]; …	-	-	-	promoter-TSS (XM_037983226.1)	-	1.80197	-	-	4.816e-19	-	-	-	-	-	-	-	-	DMR	-
CTBP2	-	-	-	-	-	-	exon (XM_007964350.2, exon 7 of 9)	-	-1.31002	-	-	2.28671e-43	-	-	-	-	-	-	-	-	DMR	-
CTCF	A0A0D9QV86	CCCTC-binding factor	chromosome, centromeric region [GO:0000775]; condensed chromosome [GO:0000793]; male germ cell nucleus [GO:0001673]; nucleolus [GO:0005730]; nucleoplasm [GO:0005654]; chromatin insulator sequence binding [GO:0043035]; chromatin loop anchoring activity [GO:0140587]; DNA-binding transcription repressor activity, RNA polymerase II-specific [GO:0001227]; metal ion binding [GO:0046872]; RNA polymerase…	-	-	-	exon (XM_007993953.2, exon 12 of 12)	-1.08433	-1.0398	-	0.0118024	0.00906367	-	-	-	-	-	-	-	DMR	DMR	-
CTDSPL2	A0A0D9RB48	CTD small phosphatase like 2	nucleoplasm [GO:0005654]; RNA polymerase II CTD heptapeptide repeat phosphatase activity [GO:0008420]; negative regulation of BMP signaling pathway [GO:0030514]; positive regulation of protein export from nucleus [GO:0046827]; protein export from nucleus [GO:0006611]	-	-	-	exon (XM_008016784.2, exon 13 of 13)	-	1.03429	-	-	0.0239859	-	-	-	-	-	-	-	-	DMR	-
CTNNB1	A0A0D9RWF4	Catenin beta 1	adherens junction [GO:0005912]; apical part of cell [GO:0045177]; apicolateral plasma membrane [GO:0016327]; basolateral plasma membrane [GO:0016323]; beta-catenin destruction complex [GO:0030877]; beta-catenin-ICAT complex [GO:1990711]; beta-catenin-TCF7L2 complex [GO:0070369]; bicellular tight junction [GO:0005923]; catenin complex [GO:0016342]; centrosome [GO:0005813]; cytosol [GO:0005829]; eu…	-	-	-	-	-	-	-	-	-	-	-	-	-1.24713	-	-	0.000123619	-	-	DEG
CTNND1	A0A0D9R121	Catenin delta 1	adherens junction [GO:0005912]; catenin complex [GO:0016342]; cell surface [GO:0009986]; cytosol [GO:0005829]; midbody [GO:0030496]; nucleus [GO:0005634]; cadherin binding [GO:0045296]; protein sequestering activity [GO:0140311]; signaling receptor binding [GO:0005102]; cell-cell adhesion mediated by cadherin [GO:0044331]; negative regulation of canonical Wnt signaling pathway [GO:0090090]; posit…	-	-	-	exon (XM_007998037.2, exon 21 of 21)	1.28045	-	-	0.000267329	-	-	-	-	-	-	-	-	DMR	-	-
CTNND1	A0A0D9R121	Catenin delta 1	adherens junction [GO:0005912]; catenin complex [GO:0016342]; cell surface [GO:0009986]; cytosol [GO:0005829]; midbody [GO:0030496]; nucleus [GO:0005634]; cadherin binding [GO:0045296]; protein sequestering activity [GO:0140311]; signaling receptor binding [GO:0005102]; cell-cell adhesion mediated by cadherin [GO:0044331]; negative regulation of canonical Wnt signaling pathway [GO:0090090]; posit…	-	-	-	exon (XM_007998037.2, exon 3 of 21)	-1.12827	-	-	1.35067e-05	-	-	-	-	-	-	-	-	DMR	-	-
CTPS1	A0A0D9S7M1	CTP synthase (EC 6.3.4.2) (UTP--ammonia ligase)	cytoophidium [GO:0097268]; cytoplasm [GO:0005737]; ATP binding [GO:0005524]; CTP synthase activity [GO:0003883]; identical protein binding [GO:0042802]; 'de novo' CTP biosynthetic process [GO:0044210]; B cell proliferation [GO:0042100]; glutamine metabolic process [GO:0006541]; pyrimidine nucleobase biosynthetic process [GO:0019856]; T cell proliferation [GO:0042098]	Catalyzes the ATP-dependent amination of UTP to CTP with either L-glutamine or ammonia as the source of nitrogen. {ECO:0000256|RuleBase:RU810713}.	-	-	exon (XM_007979227.2, exon 19 of 19)	-1.10331	-	-	0.0166461	-	-	-	-	-	-	-	-	DMR	-	-
CTSA	A0A0D9RQ15	Carboxypeptidase (EC 3.4.16.-)	intracellular membrane-bounded organelle [GO:0043231]; serine-type carboxypeptidase activity [GO:0004185]; negative regulation of chaperone-mediated autophagy [GO:1904715]; proteolysis [GO:0006508]; regulation of protein stability [GO:0031647]	-	-	-	-	-	-	-	-	-	-	-	-	-2.74783	-	-	8.4603e-18	-	-	DEG
CTSB	A0A0D9RWL1	Cathepsin B (EC 3.4.22.1)	apical plasma membrane [GO:0016324]; external side of plasma membrane [GO:0009897]; extracellular space [GO:0005615]; lysosome [GO:0005764]; peptidase inhibitor complex [GO:1904090]; perinuclear region of cytoplasm [GO:0048471]; collagen binding [GO:0005518]; cysteine-type endopeptidase activity [GO:0004197]; proteoglycan binding [GO:0043394]; cellular response to thyroid hormone stimulus [GO:009…	Thiol protease which is believed to participate in intracellular degradation and turnover of proteins. Cleaves matrix extracellular phosphoglycoprotein MEPE. Involved in the solubilization of cross-linked TG/thyroglobulin in the thyroid follicle lumen. Has also been implicated in tumor invasion and metastasis. {ECO:0000256|ARBA:ARBA00046089}.	-	GO:0046718~viral entry into host cell;GO:0044409~entry into host;GO:0051701~biological process involved in interaction with host;GO:0044000~movement in host;GO:0016032~viral process;GO:0019058~viral life cycle	-	-	-	-	-	-	-	-	-	-2.48822	-	-	1.00768e-24	-	-	DEG
CTSC	A0A0D9S0P4	Dipeptidyl peptidase 1 (EC 3.4.14.1) (Cathepsin C) (Cathepsin J) (Dipeptidyl peptidase I) (Dipeptidyl transferase)	centrosome [GO:0005813]; lysosome [GO:0005764]; nucleoplasm [GO:0005654]; cysteine-type peptidase activity [GO:0008234]; dipeptidyl-peptidase activity [GO:0008239]; peptidase activator activity involved in apoptotic process [GO:0016505]; serine-type endopeptidase activity [GO:0004252]; negative regulation of myelination [GO:0031642]; positive regulation of apoptotic signaling pathway [GO:2001235]…	Thiol protease. Has dipeptidylpeptidase activity. Active against a broad range of dipeptide substrates composed of both polar and hydrophobic amino acids. Proline cannot occupy the P1 position and arginine cannot occupy the P2 position of the substrate. Can act as both an exopeptidase and endopeptidase. Activates serine proteases such as elastase, cathepsin G and granzymes A and B. {ECO:0000256|A…	-	GO:0002682~regulation of immune system process;GO:0002376~immune system process;GO:0002684~positive regulation of immune system process;GO:0006955~immune response;GO:0002456~T cell mediated immunity;GO:0002250~adaptive immune response;GO:0002252~immune effector process;GO:0002449~lymphocyte mediated immunity;GO:0002460~adaptive immune response based on somatic recombination of immune receptors bu…	-	-	-	-	-	-	-	-	-	-3.22052	-	-	0.00129079	-	-	DEG
CTSD	A0A0D9RBZ8	Cathepsin D (EC 3.4.23.5)	cytosol [GO:0005829]; endosome membrane [GO:0010008]; lysosomal membrane [GO:0005765]; membrane raft [GO:0045121]; aspartic-type endopeptidase activity [GO:0004190]; execution phase of apoptosis [GO:0097194]; lipoprotein catabolic process [GO:0042159]; positive regulation of apoptotic process [GO:0043065]; proteolysis [GO:0006508]; regulation of establishment of protein localization [GO:0070201]	-	-	-	-	-	-	-	-	-	-	-	-	-3.27306	-	-	1.4763e-12	-	-	DEG
CTSF	A0A0D9R7K9	Cathepsin F	endoplasmic reticulum [GO:0005783]; lysosome [GO:0005764]; plasma membrane [GO:0005886]; cysteine-type peptidase activity [GO:0008234]; proteolysis [GO:0006508]	-	-	-	-	-	-	-	-	-	-	-	-	-2.25271	-	-	8.73687e-08	-	-	DEG
CTSH	A0A0D9RR74	Cathepsin H	alveolar lamellar body [GO:0097208]; cytoplasmic ribonucleoprotein granule [GO:0036464]; cytosol [GO:0005829]; extracellular space [GO:0005615]; lysosome [GO:0005764]; aminopeptidase activity [GO:0004177]; cysteine-type endopeptidase activator activity involved in apoptotic process [GO:0008656]; cysteine-type endopeptidase activity [GO:0004197]; HLA-A specific activating MHC class I receptor acti…	-	-	GO:0002250~adaptive immune response;GO:0002764~immune response-regulating signaling pathway;GO:0006955~immune response;GO:0050776~regulation of immune response;GO:0002376~immune system process;GO:0002682~regulation of immune system process	exon (XM_008015698.2, exon 10 of 12)	-1.90907	-	-	4.80335e-06	-	-	-	-	-	-	-	-	DMR	-	-
CTSH	A0A0D9RR74	Cathepsin H	alveolar lamellar body [GO:0097208]; cytoplasmic ribonucleoprotein granule [GO:0036464]; cytosol [GO:0005829]; extracellular space [GO:0005615]; lysosome [GO:0005764]; aminopeptidase activity [GO:0004177]; cysteine-type endopeptidase activator activity involved in apoptotic process [GO:0008656]; cysteine-type endopeptidase activity [GO:0004197]; HLA-A specific activating MHC class I receptor acti…	-	-	GO:0002250~adaptive immune response;GO:0002764~immune response-regulating signaling pathway;GO:0006955~immune response;GO:0050776~regulation of immune response;GO:0002376~immune system process;GO:0002682~regulation of immune system process	exon (XM_008015698.2, exon 12 of 12)	-1.47332	-	-	1.01291e-10	-	-	-	-	-	-	-	-	DMR	-	-
CTSK	A0A0D9RZM0	Cathepsin K	apical plasma membrane [GO:0016324]; external side of plasma membrane [GO:0009897]; extracellular space [GO:0005615]; lysosome [GO:0005764]; nucleoplasm [GO:0005654]; collagen binding [GO:0005518]; cysteine-type endopeptidase activity [GO:0004197]; fibronectin binding [GO:0001968]; proteoglycan binding [GO:0043394]; bone resorption [GO:0045453]; collagen catabolic process [GO:0030574]; negative r…	-	-	-	-	-	-	-	-	-	-	-	-	2.69938	-	-	0.000713919	-	-	DEG
CTSL	A0A0D9R4W3	Cathepsin L	extracellular space [GO:0005615]; Golgi apparatus [GO:0005794]; lysosome [GO:0005764]; multivesicular body [GO:0005771]; plasma membrane [GO:0005886]; collagen binding [GO:0005518]; cysteine-type endopeptidase activity [GO:0004197]; fibronectin binding [GO:0001968]; histone binding [GO:0042393]; proteoglycan binding [GO:0043394]; serpin family protein binding [GO:0097655]; adaptive immune respons…	-	-	GO:0046718~viral entry into host cell;GO:0044409~entry into host;GO:0051701~biological process involved in interaction with host;GO:0044000~movement in host;GO:0016032~viral process;GO:0002376~immune system process;GO:0019058~viral life cycle;GO:0006955~immune response;GO:0002250~adaptive immune response	-	-	-	-	-	-	-	-	-	-2.60408	-	-	2.43879e-06	-	-	DEG
CTSO	A0A0D9S1Q7	Cathepsin O	lysosome [GO:0005764]; cysteine-type peptidase activity [GO:0008234]; proteolysis [GO:0006508]	-	-	-	-	-	-	-	-	-	-	-	-	-2.30873	-	-	0.00194512	-	-	DEG
CTSS	A0A0D9RZM4	Cathepsin S	extracellular space [GO:0005615]; late endosome [GO:0005770]; lysosome [GO:0005764]; phagocytic vesicle [GO:0045335]; collagen binding [GO:0005518]; cysteine-type endopeptidase activity [GO:0004197]; fibronectin binding [GO:0001968]; laminin binding [GO:0043236]; proteoglycan binding [GO:0043394]; adaptive immune response [GO:0002250]; antigen processing and presentation of exogenous peptide anti…	-	-	GO:0002376~immune system process;GO:0002250~adaptive immune response;GO:0006955~immune response	-	-	-	-	-	-	-	-	-	4.29214	-	-	4.94204e-06	-	-	DEG
CTSZ	A0A0D9RST9	cathepsin X (EC 3.4.18.1)	cell cortex [GO:0005938]; cytoplasmic vesicle [GO:0031410]; endoplasmic reticulum [GO:0005783]; extracellular space [GO:0005615]; lysosome [GO:0005764]; cysteine-type carboxypeptidase activity [GO:0016807]; epithelial tube branching involved in lung morphogenesis [GO:0060441]; negative regulation of plasminogen activation [GO:0010757]; proteolysis [GO:0006508]	-	-	-	-	-	-	-	-	-	-	-	-	-2.19077	-	-	0.000579114	-	-	DEG
CTTN	A0A0D9RAH6	Cortactin	actin filament [GO:0005884]; cortical actin cytoskeleton [GO:0030864]; cytosol [GO:0005829]; Golgi apparatus [GO:0005794]; lamellipodium [GO:0030027]; mitotic spindle midzone [GO:1990023]; podosome [GO:0002102]; ruffle [GO:0001726]; site of polarized growth [GO:0030427]; voltage-gated potassium channel complex [GO:0008076]; actin filament binding [GO:0051015]; profilin binding [GO:0005522]; dendr…	-	-	-	-	-	-	-	-	-	-	-	-	-1.2077	-	-	0.0187492	-	-	DEG
CTXN1	A0A0D9SBV9	Cortexin 1	membrane [GO:0016020]	-	-	-	-	-	-	-	-	-	-	-	-	-3.34	-	-	5.15108e-05	-	-	DEG
CUBN	A0A0D9RJY2	Cubilin	apical plasma membrane [GO:0016324]; brush border [GO:0005903]; clathrin-coated pit [GO:0005905]; endocytic vesicle [GO:0030139]; endoplasmic reticulum [GO:0005783]; endosome [GO:0005768]; extracellular exosome [GO:0070062]; Golgi apparatus [GO:0005794]; microvillus membrane [GO:0031528]; receptor complex [GO:0043235]; calcium ion binding [GO:0005509]; cargo receptor activity [GO:0038024]; protei…	Endocytic receptor which plays a role in lipoprotein, vitamin and iron metabolism by facilitating their uptake. Acts together with LRP2 to mediate endocytosis of high-density lipoproteins, GC, hemoglobin, ALB, TF and SCGB1A1. Acts together with AMN to mediate endocytosis of the CBLIF-cobalamin complex. Binds to ALB, MB, Kappa and lambda-light chains, TF, hemoglobin, GC, SCGB1A1, APOA1, high densi…	-	-	-	-	-	-	-	-	-	-	-	2.00051	-	-	0.0123568	-	-	DEG
CUEDC2	A0A0D9QZF6	CUE domain containing 2	cytosol [GO:0005829]; nuclear membrane [GO:0031965]; nucleoplasm [GO:0005654]; ubiquitin binding [GO:0043130]; negative regulation of cytokine production involved in inflammatory response [GO:1900016]; negative regulation of macrophage cytokine production [GO:0010936]	-	-	GO:0006955~immune response;GO:0002376~immune system process;GO:0002252~immune effector process;GO:0002682~regulation of immune system process;GO:0002683~negative regulation of immune system process	TTS (XM_007963971.2)	-1.48191	-	-	0.0103585	-	-	-	-	-1.88646	-	-	0.00034553	DMR	-	DEG
CUEDC2	A0A0D9QZF6	CUE domain containing 2	cytosol [GO:0005829]; nuclear membrane [GO:0031965]; nucleoplasm [GO:0005654]; ubiquitin binding [GO:0043130]; negative regulation of cytokine production involved in inflammatory response [GO:1900016]; negative regulation of macrophage cytokine production [GO:0010936]	-	-	GO:0002252~immune effector process;GO:0002440~production of molecular mediator of immune response;GO:0002700~regulation of production of molecular mediator of immune response;GO:0002697~regulation of immune effector process;GO:0002698~negative regulation of immune effector process	TTS (XM_007963971.2)	-1.48191	-	-	0.0103585	-	-	-	-	-1.88646	-	-	0.00034553	DMR	-	DEG
CUL4B	A0A0D9S0F8	Cullin 4B	Cul4B-RING E3 ubiquitin ligase complex [GO:0031465]; cytosol [GO:0005829]; nucleoplasm [GO:0005654]; damaged DNA binding [GO:0003684]; ubiquitin protein ligase binding [GO:0031625]; astrocyte differentiation [GO:0048708]; gene expression [GO:0010467]; positive regulation of G1/S transition of mitotic cell cycle [GO:1900087]; positive regulation of protein catabolic process [GO:0045732]; proteasom…	-	-	-	exon (XM_008019464.2, exon 9 of 20)	1.21363	-	-	5.5231e-06	-	-	-	-	-1.19317	-	-	0.00332054	DMR	-	DEG
CUL5	A0A0D9S2E9	Cullin 5	Cul5-RING ubiquitin ligase complex [GO:0031466]; nucleus [GO:0005634]; site of DNA damage [GO:0090734]; ubiquitin ligase complex scaffold activity [GO:0160072]; ubiquitin protein ligase binding [GO:0031625]; proteasome-mediated ubiquitin-dependent protein catabolic process [GO:0043161]; protein K11-linked ubiquitination [GO:0070979]	-	-	-	exon (XM_008020745.2, exon 20 of 20)	-	1.09532	-	-	0.00336468	-	-	-	-	-	-	-	-	DMR	-
CUL7	A0A0D9RGM3	Cullin 7	3M complex [GO:1990393]; centrosome [GO:0005813]; Cul7-RING ubiquitin ligase complex [GO:0031467]; Golgi apparatus [GO:0005794]; perinuclear region of cytoplasm [GO:0048471]; ubiquitin protein ligase binding [GO:0031625]; epithelial to mesenchymal transition [GO:0001837]; microtubule cytoskeleton organization [GO:0000226]; mitotic cytokinesis [GO:0000281]; placenta development [GO:0001890]; posit…	-	-	-	exon (XM_007972506.2, exon 2 of 26)	-1.82606	-	-	2.37163e-05	-	-	-	-	-1.10639	-	-	0.0473012	DMR	-	DEG
CUNH11orf80	-	-	-	-	-	-	-	-	-	-	-	-	-	-	-	1.9087	-	-	0.00189314	-	-	DEG
CUNH11orf91	-	-	-	-	-	-	-	-	-	-	-	-	-	-	-	2.77023	-	-	4.5006e-08	-	-	DEG
CUNH11orf94	-	-	-	-	-	-	-	-	-	-	-	-	-	-	-	2.17197	-	-	0.0113826	-	-	DEG
CUNH11orf98	-	-	-	-	-	-	-	-	-	-	-	-	-	-	-	-2.88496	-	-	7.04814e-10	-	-	DEG
CUNH12orf66	-	-	-	-	-	-	-	-	-	-	-	-	-	-	-	1.19557	-	-	0.0274252	-	-	DEG
CUNH12orf75	-	-	-	-	-	-	-	-	-	-	-	-	-	-	-	-2.75082	-	-	6.55914e-10	-	-	DEG
CUNH13orf46	-	-	-	-	-	-	-	-	-	-	-	-	-	-	-	3.00165	-	-	0.0288985	-	-	DEG
CUNH14orf28	-	-	-	-	-	-	-	-	-	-	-	-	-	-	-	1.18906	-	-	0.020933	-	-	DEG
CUNH14orf93	-	-	-	-	-	-	exon (XM_007990805.2, exon 2 of 7)	-	-1.01421	-	-	0.00669279	-	-	-	-	-	-	-	-	DMR	-
CUNH14orf93	-	-	-	-	-	-	exon (XM_007990805.2, exon 5 of 7)	-1.87254	-1.33443	-	0.000536536	0.00334432	-	-	-	-	-	-	-	DMR	DMR	-
CUNH14orf93	-	-	-	-	-	-	exon (XM_007990805.2, exon 7 of 7)	-	-1.04616	-	-	0.00458188	-	-	-	-	-	-	-	-	DMR	-
CUNH15orf39	-	-	-	-	-	-	exon (XM_038010190.1, exon 1 of 3)	-	1.47111	-	-	0.00113464	-	-	-	-	-	-	-	-	DMR	-
CUNH15orf39	-	-	-	-	-	-	exon (XM_038010190.1, exon 2 of 3)	-	2.14092	-	-	0.000408846	-	-	-	-	-	-	-	-	DMR	-
CUNH15orf61	-	-	-	-	-	-	exon (XM_008016141.2, exon 1 of 2)	-1.04102	-	-	0.00344652	-	-	-	-	-2.30205	-	-	0.0137595	DMR	-	DEG
CUNH16orf95	-	-	-	-	-	-	-	-	-	-	-	-	-	-	-	1.54913	-	-	0.0171549	-	-	DEG
CUNH17orf49	-	-	-	-	-	-	-	-	-	-	-	-	-	-	-	-2.22198	-	-	0.0105734	-	-	DEG
CUNH17orf80	-	-	-	-	-	-	promoter-TSS (XM_008011937.2)	-	-1.04333	-	-	0.00271492	-	-	-	-	-	-	-	-	DMR	-
CUNH17orf98	-	-	-	-	-	-	-	-	-	-	-	-	-	-	-	1.634	-	-	0.0103124	-	-	DEG
CUNH18orf25	-	-	-	-	-	-	-	-	-	-	-	-	-	-	-	1.30968	-	-	0.000430272	-	-	DEG
CUNH19orf12	-	-	-	-	-	-	intron (XM_007996133.2, intron 1 of 2)	-	-1.03992	-	-	0.0252942	-	-	-	-	-	-	-	-	DMR	-
CUNH19orf53	-	-	-	-	-	-	-	-	-	-	-	-	-	-	-	-1.31466	-	-	0.0165414	-	-	DEG
CUNH19orf71	-	-	-	-	-	-	-	-	-	-	-	-	-	-	-	2.04336	-	-	0.00149928	-	-	DEG
CUNH1orf167	-	-	-	-	-	-	TTS (XM_007980545.2)	-1.94341	-	-	0.0149982	-	-	-	-	-	-	-	-	DMR	-	-
CUNH1orf52	-	-	-	-	-	-	-	-	-	-	-	-	-	-	-	1.577	-	-	3.58523e-05	-	-	DEG
CUNH1orf56	-	-	-	-	-	-	-	-	-	-	-	-	-	-	-	2.49407	-	-	0.0214173	-	-	DEG
CUNH2orf42	-	-	-	-	-	-	exon (XM_007970334.2, exon 3 of 10)	-1.07253	-	-	0.00570737	-	-	-	-	1.22052	-	-	0.0144852	DMR	-	DEG
CUNH3orf14	-	-	-	-	-	-	-	-	-	-	-	-	-	-	-	-2.05467	-	-	0.0225494	-	-	DEG
CUNH3orf38	-	-	-	-	-	-	-	-	-	-	-	-	-	-	-	2.27118	-	-	6.1765e-05	-	-	DEG
CUNH4orf3	-	-	-	-	-	-	-	-	-	-	-	-	-	-	-	-1.76297	-	-	0.00135017	-	-	DEG
CUNH4orf46	-	-	-	-	-	-	exon (XM_008000122.2, exon 2 of 2)	1.73017	1.44107	-	3.44857e-08	2.65786e-06	-	-	-	-2.48404	-	-	0.000911414	DMR	DMR	DEG
CUNH4orf48	-	-	-	-	-	-	-	-	-	-	-	-	-	-	-	-2.44278	-	-	0.00666573	-	-	DEG
CUNH5orf15	-	-	-	-	-	-	exon (XM_008014415.2, exon 3 of 3)	-	1.08123	-	-	1.23732e-11	-	-	-	-1.93901	-	-	1.04607e-09	-	DMR	DEG
CUNH5orf24	-	-	-	-	-	-	exon (XM_008014475.2, exon 2 of 2)	-	1.15169	-	-	0.0052041	-	-	-	-	-	-	-	-	DMR	-
CUNH5orf51	-	-	-	-	-	-	exon (XM_007961482.2, exon 1 of 6)	1.03326	-	-	4.23775e-08	-	-	-	-	-	-	-	-	DMR	-	-
CUNH5orf51	-	-	-	-	-	-	exon (XM_007961482.2, exon 3 of 6)	1.06425	-	-	0.000674841	-	-	-	-	-	-	-	-	DMR	-	-
CUNH5orf63	-	-	-	-	-	-	-	-	-	-	-	-	-	-	-	1.3805	-	-	0.00913056	-	-	DEG
CUNH7orf26	-	-	-	-	-	-	exon (XM_037995462.1, exon 4 of 6)	-1.17799	-	-	0.000938713	-	-	-	-	-	-	-	-	DMR	-	-
CUNH9orf116	-	-	-	-	-	-	-	-	-	-	-	-	-	-	-	-2.41376	-	-	0.00194512	-	-	DEG
CUNH9orf24	-	-	-	-	-	-	-	-	-	-	-	-	-	-	-	3.73056	-	-	0.0140199	-	-	DEG
CUNH9orf78	-	-	-	-	-	-	-	-	-	-	-	-	-	-	-	-1.61564	-	-	0.00417751	-	-	DEG
[truncated: 6,244 more rows]

## Sheet: Table S2
ID	ONTOLOGY	Description	P-value	FDR-adjusted P-value	Number of genes	List of genes	time point	differential gene expression
[truncated: 155 more rows]

[truncated: 4 more sheets: Table S3, Table S4, Table S5, Table S6]
