# Supplementary material for: Poxvirus Replication Remodels Host m⁶A Epitranscriptome to Advance Infection
Source: Research Square preprint supplement (doi:10.21203/rs.3.rs-8681681/v1), 2026-02-05
Supplement: Supplementary file [file 2de52b5d1b8de3f314940970.pdf]

Image Report: a-YTDHF1\_ 2025-06-26 HMEC\_VV\_siR\_Y

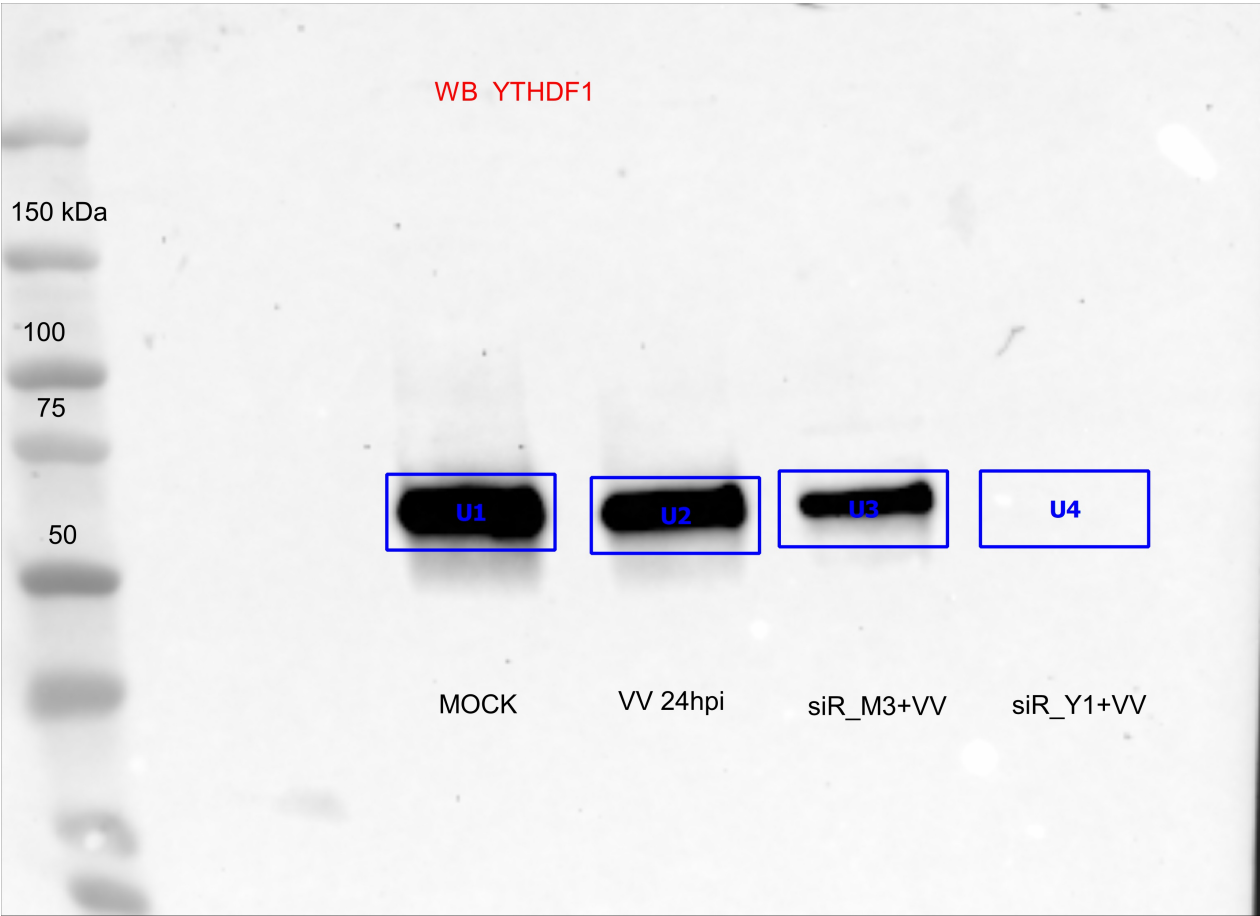

D:\YTHDF1-Images 2025-11-10\_Vero-VV\ a-YTDHF1\_ 2025-06-26 HMEC\_VV\_siR\_Y.scn

Acquisition Information

|        |              |
|--------|--------------|
| Imager | Merged Image |
|--------|--------------|

Image Information

|                  |                      |
|------------------|----------------------|
| Acquisition Date | 12/5/2025 4:16:14 PM |
| User Name        | 229740               |
| Image Area (mm)  | X: 50.0 Y: 36.3      |
| Pixel Size (µm)  | X: 131.0 Y: 131.0    |
| Data Range (Int) | 0 - 34785            |

Notes

Merged from:  
Image 1: a-YTDHF1\_ 2025-06-26 HMEC\_VV  
Image 2: sofiya 2025-06-26 21h24m47s

Use the merged image to estimate molecular weight only if sample was not moved between acquisition

of individual images.

## Analysis Settings

|                 |                                                                            |
|-----------------|----------------------------------------------------------------------------|
| Volume Analysis | Background subtraction method: Local<br>Quantity regression method: Linear |
|-----------------|----------------------------------------------------------------------------|

## Volume Analysis

| No. | Label | Type    | Volume (Int) | Adj. Vol. (Int) | Mean Bkgd. (Int) | Abs. Quant. | Rel. Quant. | # of Pixels | Min. Value (Int) | Max. Value (Int) | Mean Value (Int) | Std. Dev. | Area (mm2) |
|-----|-------|---------|--------------|-----------------|------------------|-------------|-------------|-------------|------------------|------------------|------------------|-----------|------------|
| 1   | U1    | Unknown | 28,267,585   | 20,995,132      | 6,199.9          | N/A         | N/A         | 1,173       | 1,384            | 34,701           | 24,098.5         | 11,737.5  | 20.1       |
| 2   | U2    | Unknown | 23,350,724   | 18,788,086      | 3,889.7          | N/A         | N/A         | 1,173       | 1,346            | 34,785           | 19,906.8         | 12,999.3  | 20.1       |
| 3   | U3    | Unknown | 15,614,517   | 13,150,090      | 2,101.0          | N/A         | N/A         | 1,173       | 1,116            | 34,522           | 13,311.6         | 12,846.2  | 20.1       |
| 4   | U4    | Unknown | 1,493,694    | -38,012         | 1,305.8          | N/A         | N/A         | 1,173       | 0                | 2,077            | 1,273.4          | 204.7     | 20.1       |
